# Supplementary material for: Pollen Number and Ribosome Gene Expression Altered in a Genome-Editing Mutant of REDUCED POLLEN NUMBER1 Gene
Source: Front Plant Sci. 2022 Jan 11;12:768584. doi: 10.3389/fpls.2021.768584 (PMC8787260; doi:10.3389/fpls.2021.768584)
Supplement: Supplementary Table 2 — List of differentially expressed genes (3020 genes) between wild-type and rdp1-3 plants. [file Table_2.XLSX]

## Sheet: Sheet1
Supplementary Table2. List of differentially expressed genes (3020 genes) between wild-type and rdp1-3 plants.
Identifier	WT_avg	rdp1-3_avg	Fold change	Up/Down	Gene Name	Description	FDR	WT_1 [FPKM]	WT_2 [FPKM]	WT_3 [FPKM]	WT_4 [FPKM]	rdp1-3_1 [FPKM]	rdp1-3_2 [FPKM]	rdp1-3_3 [FPKM]	rdp1-3_4 [FPKM]
AT5G55270	0.4457	12.765	28.6403	Up	DUF295 ORGANELLAR B 14 (ATDOB14)	hypothetical protein (DUF295);(source:Araport11)	3.2e-75	0.4304	0.3665	0.4861	0.4998	12.72	13.79	12.43	12.12
AT3G01600	1.0179	15.0375	14.7731	Up	NAC DOMAIN CONTAINING PROTEIN 44 (NAC044)	NAC domain containing protein 44;(source:Araport11)	1.445e-60	1.158	1.17	0.6836	1.06	13.29	14.36	15.9	16.6
AT5G53240	0.143295	10.9635	76.51	Up	DUF295 ORGANELLAR B 7 (ATDOB7)	hypothetical protein (DUF295);(source:Araport11)	7.803e-47	0.2956	0.2098	0.01269	0.05509	11.61	11.63	11.49	9.124
AT4G13680	0.110047	5.19975	47.2501	Up	DUF295 ORGANELLAR B 3 (ATDOB3)	hypothetical protein (DUF295);(source:Araport11)	2.751e-41	0.2139	0.1229	0.04958	0.05381	5.225	5.744	5.209	4.621
AT1G17960	0.971875	10.8648	11.1792	Up		Threonyl-tRNA synthetase;(source:Araport11)	5.468e-41	0.8047	1.175	0.8098	1.098	8.349	10.98	10.03	14.1
AT3G61630	6.7535	33.87	5.01518	Up	CYTOKININ RESPONSE FACTOR 6 (CRF6)	CRF6 encodes one of the six cytokinin response factors. CRF5 belongs to the AP2/ERF superfamily of the transcriptional factors. CRF proteins rapidly relocalize to the nucleus in response to cytokinin. Analysis of loos-of-function mutants revealed that the CRFs function redundantly to regulate the development of embryos, cotyledons and leaves.	9.772e-26	9.125	6.695	5.247	5.947	24.79	32.11	34.24	44.34
AT5G19120	11.7803	55.3625	4.6996	Up		Eukaryotic aspartyl protease family protein;(source:Araport11)	1.857e-24	13.46	9.691	10.71	13.26	38.37	51.62	60.17	71.29
AT5G46710	16.5975	60.6475	3.65401	Up		PLATZ transcription factor family protein;(source:Araport11)	1.174e-23	17.98	15.97	16.41	16.03	45.81	70.44	64.29	62.05
AT4G05370	1.44705	26.0425	17.997	Up			2.875e-22	0.889	1.605	2.523	0.7712	19.56	25.04	20.85	38.72
AT4G05380	0.424825	8.70875	20.4996	Up		P-loop nucleoside triphosphate hydrolase superfamily protein;(source:Araport11)	1.691e-21	0.6094	0.5661	0.2141	0.3097	4.963	9.471	6.431	13.97
AT1G11482	0.344375	4.58675	13.3191	Up		pseudogene of hypothetical protein (DUF295);(source:Araport11)	4.372e-21	0.3326	0.1888	0.257	0.5991	4	4.79	3.823	5.734
AT5G21940	13.5542	72.0375	5.31475	Up		hybrid signal transduction histidine kinase M-like protein;(source:Araport11)	8.694e-21	15.71	8.157	13.77	16.58	48.59	75.79	81.82	81.95
AT5G53230	0.9778	9.6265	9.84506	Up	DUF295 ORGANELLAR B 6 (ATDOB6)	hypothetical protein (DUF295);(source:Araport11)	9.269e-20	1.009	0.4242	1.407	1.071	8.921	9.221	9.294	11.07
AT1G25260	99.3775	28.47	0.286483	Down	REDUCED POLLEN NUMBER (RDP)	Involved in male gamete development. Trans-acting factor in the assembly of the pre-60S particle.	1.561e-18	112.5	102.2	69.31	113.5	25.17	36.68	27.82	24.21
AT5G28335	0.02559	0.390575	15.2628	Up		transposable_element_gene;(source:Araport11);gypsy-like retrotransposon family, has a 4.8e-178 P-value blast match to GB:AAD22153 polyprotein (Gypsy_Ty3-element) (Sorghum bicolor);(source:TAIR10)	3.361e-17	0.01935	0.04237	0.01282	0.02782	0.3576	0.3897	0.3243	0.4907
AT1G36180	3.78825	17.1375	4.52386	Up	ACETYL-COA CARBOXYLASE 2 (ACC2)	acetyl-CoA carboxylase 2 (ACC2) The mRNA is cell-to-cell mobile.	1.124e-15	3.925	4.532	2.982	3.714	13.11	11.95	14.7	28.79
AT2G04050	0.0568092	1.34982	23.7607	Up		MATE efflux family protein;(source:Araport11)	4.11e-15	0.009647	0.1355	0.03355	0.04854	0.9843	1.501	1.053	1.861
AT3G46600	5.636	17.4925	3.10371	Up		GRAS family transcription factor;(source:Araport11)	5.475e-14	5.734	5.437	4.934	6.439	12.07	17.29	17.49	23.12
AT4G37610	2.16825	16.6653	7.68604	Up	BTB AND TAZ DOMAIN PROTEIN 5 (bt5)	BTB and TAZ domain protein. Located in cytoplasm and expressed in fruit, flower and leaves.	1.71e-12	3.937	1.077	1.699	1.96	7.531	18.67	18.01	22.45
AT2G25900	21.93	71.2525	3.24909	Up	(ATCTH)	Encodes a protein with two tandem-arrayed CCCH-type zinc fingers that binds RNA and is involved in RNA turnover. The mRNA is cell-to-cell mobile.	6.994e-12	27.77	17.57	21.12	21.26	45.95	60.64	83.6	94.82
AT3G56400	11.3075	42.93	3.7966	Up	WRKY DNA-BINDING PROTEIN 70 (WRKY70)	Member of WRKY Transcription Factor; Group III. Function as activator of SA-dependent defense genes and a repressor of JA-regulated genes. WRKY70-controlled suppression of JA-signaling is partly executed by NPR1.	4.107e-11	10.23	11.9	12.59	10.51	26.17	55.88	29.35	60.32
AT2G20670	0.972775	7.38325	7.58988	Up		sugar phosphate exchanger, putative (DUF506);(source:Araport11)	4.451e-11	1.269	0.7612	0.8059	1.055	2.855	6.464	7.014	13.2
AT2G40000	1.38075	6.49375	4.70306	Up	ORTHOLOG OF SUGAR BEET HS1 PRO-1 2 (HSPRO2)	ortholog of sugar beet HS1 PRO-1 2;(source:Araport11)	3.457e-10	1.407	1.124	1.515	1.477	3.965	6.022	5.478	10.51
AT4G03510	8.614	24.3525	2.82708	Up	RING MEMBRANE-ANCHOR 1 (RMA1)	RMA1 encodes a novel 28 kDa protein with a RING finger motif and a C-terminal membrane-anchoring domain that is involved in the secretory pathway. Has E3 ubiquitin ligase activity.	3.722e-10	9.682	7.374	7.502	9.898	15.08	25.13	27.37	29.83
AT3G59940	7.35375	20.92	2.84481	Up	KISS ME DEADLY 4 (KMD4)	Encodes a member of a family of F-box proteins, called the KISS ME DEADLY (KMD) family, that targets type-B ARR proteins for degradation and is involved in the negative regulation of the cytokinin response. Also named as KFB50, a member of a group of Kelch repeat F-box proteins that negatively regulate phenylpropanoid biosynthesis by targeting the phenypropanoid biosynthesis enzyme phenylalanine …	5.217e-10	7.758	6.27	6.282	9.105	14.02	19.49	22.87	27.3
AT5G17165	32.4	9.9905	0.308349	Down		hypothetical protein;(source:Araport11)	1.232e-09	26.5	27.53	40.69	34.88	8.806	10.05	8.606	12.5
AT2G18720	0.449275	2.22075	4.94296	Up		Translation elongation factor EF1A/initiation factor IF2gamma family protein;(source:Araport11)	1.627e-09	0.3213	0.4586	0.3833	0.6339	2.118	1.952	2.091	2.722
AT5G07510	438.475	187.375	0.427333	Down	GLYCINE-RICH PROTEIN 14 (GRP14)	encodes a glycine-rich protein that is expressed in low abundance in stems and leaves, and very low abundance in flowers.	1.627e-09	373	453.8	400.3	526.8	192.8	205.6	195.6	155.5
AT1G80840	0.241435	3.0885	12.7923	Up	WRKY DNA-BINDING PROTEIN 40 (WRKY40)	Pathogen-induced transcription factor. Binds W-box sequences in vitro. Forms protein complexes with itself and with WRKY40 and WRKY60. Coexpression with WRKY18 or WRKY60 made plants more susceptible to both P. syringae and B. cinerea. WRKY18, WRKY40, and WRKY60 have partially redundant roles in response to the hemibiotrophic bacterial pathogen Pseudomonas syringae and the necrotrophic fungal path…	2.02e-09	0.3679	0.2202	0.3198	0.05784	1.272	4.387	2.023	4.672
AT4G32480	1.46437	7.609	5.19607	Up		sugar phosphate exchanger, putative (DUF506);(source:Araport11)	2.124e-09	1.888	1.453	0.7715	1.745	4	7.059	7.367	12.01
AT1G68520	8.91925	23.005	2.57925	Up	B-BOX DOMAIN PROTEIN 14 (BBX14)	B-box type zinc finger protein with CCT domain-containing protein;(source:Araport11)	3.871e-09	11.38	8.226	7.076	8.995	16.84	20.6	23.51	31.07
AT2G13410	0.038075	0.383075	10.0611	Up		pseudogene of myosin heavy chain-like protein;(source:Araport11)	6.745e-09	0.01792	0.05034	0.05399	0.03005	0.5716	0.2351	0.274	0.4516
AT5G58610	1.1144	3.87025	3.47295	Up		PHD finger transcription factor;(source:Araport11)	7.882e-09	1.285	1.162	1.114	0.8966	2.521	3.437	3.646	5.877
AT5G61600	0.30695	1.86925	6.08975	Up	ETHYLENE RESPONSE FACTOR 104 (ERF104)	encodes a member of the ERF (ethylene response factor) subfamily B-3 of ERF/AP2 transcription factor family. The protein contains one AP2 domain. There are 18 members in this subfamily including ATERF-1, ATERF-2, AND ATERF-5. Involved in regulating root architecture.	8.794e-09	0.2918	0.4744	0.2614	0.2002	1.258	2.225	2.186	1.808
AT3G15450	74.245	331.1	4.45956	Up		aluminum induced protein with YGL and LRDR motifs;(source:Araport11)	8.847e-09	132.8	42.99	67.21	53.98	180.7	297.5	377.7	468.5
AT4G29340	81.19	32.255	0.397278	Down	PROFILIN 4 (PRF4)	Profilin is a low-molecular weight, actin monomer-binding protein that regulates the organization of actin cytoskeleton in eukaryotes, including higher plants. PRF4 and PRF5 are late pollen-specific and are not detectable in other cell types of the plant body including microspores and root hairs. Immunocytochemical studies at the subcellular level reveal that both the constitutive and pollen-spec…	1.522e-08	74.21	96.74	55.37	98.44	37.88	31.3	32.84	27
AT2G38470	1.32275	6.377	4.82102	Up	WRKY DNA-BINDING PROTEIN 33 (WRKY33)	Member of the plant WRKY transcription factor family. Regulates the antagonistic relationship between defense pathways mediating responses to P. syringae and necrotrophic fungal pathogens. Located in nucleus. Involved in response to various abiotic stresses - especially salt stress. Regulates cytochrome P450 gene CYP94B1 to control apoplastic barrier formation in roots to confer salt tolerance.	1.983e-08	1.336	1.066	1.927	0.962	3.141	9.582	6.809	5.976
AT2G04460	9.672	3.38125	0.349592	Down		transposable_element_gene;(source:Araport11);similar to unknown protein [Arabidopsis thaliana] (TAIR:AT2G10090.1);(source:TAIR10)	2.469e-08	8.24	10.19	11.32	8.938	3.177	3.56	4.09	2.698
AT4G11280	2.7065	7.24825	2.67809	Up	1-AMINOCYCLOPROPANE-1-CARBOXYLIC ACID (ACC) SYNTHASE 6 (ACS6)	encodes a a member of the 1-aminocyclopropane-1-carboxylate (ACC) synthase (S-adenosyl-L-methionine methylthioadenosine-lyase, EC 4.4.1.14) gene family The mRNA is cell-to-cell mobile.	2.926e-08	2.948	3.131	2.01	2.737	5.324	8.622	7.281	7.766
AT3G10890	8.43775	2.053	0.243311	Down	ENDO-BETA-MANNANASE 3 (MAN3)	Encodes an endo beta mannanase that is localized to the apoplast and involved in glutathione mediated cadmium tolerance.	3.24e-08	6.675	14.08	6.577	6.419	2.574	1.974	2.205	1.459
AT1G21520	2.233	8.03325	3.59751	Up		hypothetical protein;(source:Araport11)	4.75e-08	2.82	2.105	1.861	2.146	6.702	10.07	6.49	8.871
AT5G17090	48.855	19.165	0.392283	Down		Cystatin/monellin superfamily protein;(source:Araport11)	5.705e-08	49.11	42.96	34.41	68.94	18.43	22.33	19.54	16.36
AT2G15890	39.6825	99.09	2.49707	Up	MATERNAL EFFECT EMBRYO ARREST 14 (MEE14)	Encodes CBP1, a regulator of transcription initiation in central cell-mediated pollen tube guidance.	1.575e-07	53.88	30.36	38.95	35.54	67.54	91.72	121	116.1
AT2G20800	0.77695	2.8925	3.72289	Up	NAD(P)H DEHYDROGENASE B4 (NDB4)	NAD(P)H dehydrogenase B4;(source:Araport11)	1.652e-07	0.686	0.8274	0.8658	0.7286	2.234	2.427	2.694	4.215
AT4G36040	131.51	309.175	2.35096	Up	DNAJ11 (J11)	Chaperone DnaJ-domain superfamily protein;(source:Araport11)	1.725e-07	146	90.74	140.4	148.9	241.2	333.4	352.9	309.2
AT4G17710	0.154455	0.92655	5.99883	Up	HOMEODOMAIN GLABROUS 4 (HDG4)	Encodes a homeobox-leucine zipper family protein belonging to the HD-ZIP IV family.	1.781e-07	0.2427	0.1305	0.05182	0.1928	0.7434	0.7917	0.9721	1.199
AT5G07520	63.575	31.9075	0.501888	Down	GLYCINE-RICH PROTEIN 18 (GRP18)	encodes a glycine-rich protein that is expressed only in flowers during a specific developmental stage (flower stage 12).	1.898e-07	62.37	69.03	54.62	68.28	29.7	35.4	32.97	29.56
AT1G05680	2.57975	7.0965	2.75085	Up	URIDINE DIPHOSPHATE GLYCOSYLTRANSFERASE 74E2 (UGT74E2)	Encodes a UDP-glucosyltransferase, UGT74E2, that acts on IBA (indole-3-butyric acid) and affects auxin homeostasis. The transcript and protein levels of this enzyme are strongly induced by H2O2 and may allow integration of ROS (reactive oxygen species) and auxin signaling. This enzyme can also transfer glycosyl groups to several compounds related to the explosive TNT when this synthetic compound …	2.486e-07	2.759	2.852	2.988	1.72	7.056	7.125	7.015	7.19
AT1G80920	27.3575	81.1625	2.96674	Up	(J8)	A nuclear encoded soluble protein found in the chloroplast stroma. Negatively regulated by light and has rapid turnover in darkness.	2.881e-07	36.71	20.49	20.48	31.75	49.05	71.35	78.15	126.1
AT1G49130	4.49925	12.9727	2.88331	Up	B-BOX DOMAIN PROTEIN 17 (BBX17)	Regulated by heat shock.	2.881e-07	6.214	4.946	3.844	2.993	9.531	11.81	14.37	16.18
AT3G44750	66.0225	121.05	1.83347	Up	HISTONE DEACETYLASE 3 (HDA3)	Encodes a histone deacetylase. Controls the development of adaxial/abaxial leaf polarity. Two lines with RNAi-directed against this gene show reduced Agrobacterium-mediated DNA transformation of the roots. Involved in development of the vascular tissue of the stem by affecting cell proliferation and differentiation.	2.999e-07	66.81	70.43	58.25	68.6	106.6	128.5	118.3	130.8
AT1G67870	46.385	21.83	0.470626	Down		glycine-rich protein;(source:Araport11)	3.724e-07	43.41	48.17	35.18	58.78	20.82	21.5	20.44	24.56
AT2G41225	7.867	1.88125	0.239132	Down	ORGAN SIZE RELATED 2 (OSR2)	Encodes a protein of unknown function that is involved in regulation of cell expansion. Based on sequence similarity OSR2 is localized to the plasma membrane. It is expressed in organs that are undergoing cell expansion. Over-expression modifies plant sensitivity to ethylene, leading to improved drought tolerance.	4.022e-07	5.681	8.982	6.375	10.43	2.116	1.753	2.187	1.469
AT1G79800	54.8475	22.0075	0.401249	Down	EARLY NODULIN-LIKE PROTEIN 7 (ENODL7)	early nodulin-like protein 7;(source:Araport11)	4.264e-07	50.68	46.28	69.48	52.95	20.75	24.9	26.08	16.3
AT2G41100	0.474675	2.89675	6.1026	Up	TOUCH 3 (TCH3)	encodes a calmodulin-like protein, with six potential calcium binding domains. Calcium binding shown by Ca(2+)-specific shift in electrophoretic mobility. Expression induced by touch and darkness. Expression may also be developmentally controlled. Expression in growing regions of roots, vascular tissue, root/shoot junctions, trichomes, branch points of the shoot, and regions of siliques and flowe…	6.234e-07	0.4245	0.6626	0.3963	0.4153	1.084	3.496	2.276	4.731
AT3G43652	0.14815	0.001829	0.0123456	Down		transposable_element_gene;(source:Araport11);CACTA-like transposase family (En/Spm), has a 5.2e-105 P-value blast match to GB:AAD55677 putative transposase protein (CACTA-element) transposon=Shooter (Zea mays);(source:TAIR10)	6.283e-07	0.1035	0.1384	0.1028	0.2479	0	0	0.007316	0
AT3G49540	26.25	8.66675	0.330162	Down		hypothetical protein;(source:Araport11)	6.33e-07	23.07	29.43	29.8	22.7	13.56	7.688	7.633	5.786
AT2G41905	1026.4	365.4	0.356002	Down		transmembrane protein;(source:Araport11)	6.39e-07	888.8	1075	874.8	1267	550.9	390.1	288.4	232.2
AT3G14210	4.43275	10.9097	2.46117	Up	EPITHIOSPECIFIER MODIFIER 1 (ESM1)	A semidominant QTL which has an epistatic effect on the Epithiospecifier gene. Represses nitrile formation and favors isothiocyanate production during glucosinolate hydrolysis. The functional allele deters the insect herbivory T. ni.	7.439e-07	5.378	5.179	3.328	3.846	9.537	12.28	13.43	8.392
AT1G75930	244.125	120.375	0.493088	Down	EXTRACELLULAR LIPASE 6 (EXL6)	member of Lipase proteins	7.601e-07	214	252.8	272.6	237.1	116.8	130.2	129.5	105
AT4G27010	3.59925	8.93475	2.48239	Up	EMBRYO DEFECTIVE 2788 (EMB2788)	ribosome 60S biogenesis amino-terminal protein;(source:Araport11)	8.407e-07	3.931	4.131	2.454	3.881	6.865	7.245	7.739	13.89
AT5G61440	4.19125	10.5845	2.52538	Up	ATYPICAL CYS HIS RICH THIOREDOXIN 5 (ACHT5)	Encodes a member of the thioredoxin family protein. Located in the chloroplast. The mRNA is cell-to-cell mobile.	1.074e-06	4.891	4.837	2.893	4.144	7.678	11.31	10.9	12.45
AT4G33355	626.45	294.175	0.469591	Down		Predicted to encode a PR (pathogenesis-related) protein. Belongs to the lipid transfer protein (PR-14) family with the following members: At2g38540/LTP1, At2g38530/LTP2, At5g59320/LTP3, At5g59310/LTP4, At3g51600/LTP5, At3g08770/LTP6, At2g15050/LTP7, At2g18370/LTP8, At2g15325/LTP9, At5g01870/LTP10, At4g33355/LTP11, At3g51590/LTP12, At5g44265/LTP13, At5g62065/LTP14, At4g08530/LTP15.	1.534e-06	589.7	646.4	618	651.7	299.2	323.4	345.9	208.2
AT3G06530	13.07	28.3225	2.16699	Up		ARM repeat superfamily protein;(source:Araport11)	1.808e-06	13.28	15.82	11.73	11.45	24.76	22.68	24.71	41.14
AT5G22800	5.3405	13.8125	2.58637	Up	EMBRYO DEFECTIVE 1030 (EMB1030)	A locus involved in embryogenesis. Mutations in this locus result in embryo lethality.	1.922e-06	5.843	5.945	4.446	5.128	9.35	11.57	11.4	22.93
AT4G04077	79.2825	35.265	0.444802	Down		Natural antisense transcript overlaps with AT4G04078;(source:Araport11)	2.258e-06	75.4	96.51	58.87	86.35	40.41	35.98	39.73	24.94
AT3G25050	75.6775	34.705	0.458591	Down	XYLOGLUCAN ENDOTRANSGLUCOSYLASE/HYDROLASE 3 (XTH3)	Encodes an endotransglucosylase that cleaves the beta-1,4-glucosidic linkage in amorphous cellulose and ligates the nascent reducing end to a non-reducing terminus of either cellulosic or xyloglucan oligosaccharide. Higher expression in flowers and in response to IAA treatment.	2.276e-06	91.63	81	51.92	78.16	31.41	39.31	41.05	27.05
AT5G14580	8.428	17.705	2.10074	Up		polyribonucleotide nucleotidyltransferase;(source:Araport11)	2.78e-06	8.475	9.706	7.359	8.172	15.05	14.63	15.97	25.17
AT5G57560	2.10625	7.52675	3.57353	Up	TOUCH 4 (TCH4)	Encodes a cell wall-modifying enzyme, rapidly upregulated in response to environmental stimuli.	3.581e-06	2.024	1.268	3.079	2.054	5.206	9.714	6.863	8.324
AT1G75910	408.3	210.2	0.514818	Down	EXTRACELLULAR LIPASE 4 (EXL4)	Member of Lipase proteins. Involved in lipid metabolism and pollen wall formation. DYT1 and bHLH089 specifically recognize the TCATGTGC box to activate expression.	4.671e-06	419.5	415.2	349.2	449.3	162	229.4	220.6	228.8
AT3G57690	1456	533.55	0.366449	Down	ARABINOGALACTAN PROTEIN 23 (AGP23)	Encodes a putative arabinogalactan-protein (AGP23).	4.961e-06	1442	1549	1254	1579	791.2	591.5	475.1	276.4
AT3G02480	274.875	114.89	0.417972	Down	ABA-RESPONSE PROTEIN (ABR)	Late embryogenesis abundant protein (LEA) family protein;(source:Araport11)	5.459e-06	193.1	327.2	265.5	313.7	157.7	110.1	109.1	82.66
AT1G75920	54.1375	27.8925	0.515216	Down	(EXL5)	GDSL-motif esterase/acyltransferase/lipase. Enzyme group with broad substrate specificity that may catalyze acyltransfer or hydrolase reactions with lipid and non-lipid substrates. The mRNA is cell-to-cell mobile.	5.513e-06	58.4	54.7	42.89	60.56	22.74	32.46	26.35	30.02
AT5G18670	23.965	56.3725	2.35228	Up	BETA-AMYLASE 3 (BMY3)	putative beta-amylase BMY3 (BMY3)	5.546e-06	30.41	22.73	17.63	25.09	31.02	60.63	60.52	73.32
AT1G13150	22.9425	11.7325	0.511387	Down	CYTOCHROME P450, FAMILY 86, SUBFAMILY C, POLYPEPTIDE 4 (CYP86C4)	member of CYP86C	5.546e-06	20.94	21.78	21.98	27.07	10.04	11.72	11.89	13.28
AT4G29780	0.60195	2.976	4.94393	Up		Expression of the gene is affected by multiple stresses. Knockout and overexpression lines show no obvious phenotypes.	5.546e-06	0.9933	0.5991	0.3758	0.4396	1.576	2.615	2.089	5.624
AT1G67120	3.89775	10.343	2.65358	Up	MIDASIN 1 (MDN1)	Represents a homolog of the yeast MDN gene, which encodes a non-ribosomal protein involved in the maturation and assembly of the 60S ribosomal subunit. In Arabidopsis, it is essential for female gametogenesis progression.	5.546e-06	4.03	4.825	3.006	3.73	7.372	7.833	7.807	18.36
AT5G18040	28.03	14.41	0.514092	Down	HEAT-INDUCED TAS1 TARGET 2 (HTT2)	target of trans acting-siR480/255 protein;(source:Araport11)	5.546e-06	29.25	27.95	23.81	31.11	13.46	16.42	15.37	12.39
AT2G05914	1.78943	5.666	3.16638	Up		Potential natural antisense gene, locus overlaps with AT2G05915	5.939e-06	1.598	2.421	2.14	0.9987	6.39	4.414	5.35	6.51
AT1G48953	31.91	6.23075	0.19526	Down		hypothetical protein;(source:Araport11)	5.987e-06	15.36	24.88	46.21	41.19	10.7	5.646	5.772	2.805
AT4G25950	107.817	43.775	0.40601	Down	VACUOLAR ATP SYNTHASE G3 (VATG3)	V-ATPase G-subunit like protein	7.92e-06	70.77	110.2	119.8	130.5	57.79	44.34	38.64	34.33
AT4G17490	0.50425	2.547	5.05107	Up	ETHYLENE RESPONSIVE ELEMENT BINDING FACTOR 6 (ERF6)	Encodes a member of the ERF (ethylene response factor) subfamily B-3 of ERF/AP2 transcription factor family (ATERF-6). The protein contains one AP2 domain. There are 18 members in this subfamily including ATERF-1, ATERF-2, AND ATERF-5. It is involved in the response to reactive oxygen species and light stress. Involved in regulating root architecture and the response to cold stress.	8.434e-06	0.4643	0.3219	0.8303	0.4005	1.658	3.965	2.177	2.388
AT1G50920	67.3125	119.375	1.77344	Up	(NOG1-1)	Putative GTPase involved in HA - and ABA-mediated signaling pathways, particularly during defense respnses to pathogens. Has paralog NOG1-2.	8.622e-06	69.9	75.38	59.83	64.14	114.2	105.1	122.9	135.3
AT3G05060	44.93	77.965	1.73525	Up		SAR DNA-binding protein, putative, strong similarity to SAR DNA-binding protein-1 (Pisum sativum) GI:3132696; contains Pfam profile PF01798: Putative snoRNA binding domain; encodes NOP58-like protein	1.023e-05	47.19	48.94	41.35	42.24	72.29	70.83	81	87.74
AT2G32670	10.962	4.9555	0.452062	Down	VESICLE-ASSOCIATED MEMBRANE PROTEIN 725 (VAMP725)	member of Synaptobrevin -like protein family	1.065e-05	10.01	9.488	10.74	13.61	4.464	4.818	4.757	5.783
ATCG00490	232.325	636.3	2.73884	Up	(RBCL)	large subunit of RUBISCO. Protein is tyrosine-phosphorylated and its phosphorylation state is modulated in response to ABA in Arabidopsis thaliana seeds.	1.085e-05	205	291.6	266.3	166.4	611.9	387.5	537.8	1008
ATCG00580	178.6	397.825	2.22746	Up	PHOTOSYSTEM II REACTION CENTER PROTEIN E (PSBE)	PSII cytochrome b559. There have been many speculations about the function of Cyt b559, but the most favored at present is that it plays a protective role by acting as an electron acceptor or electron donor under conditions when electron flow through PSII is not optimized.	1.085e-05	160.5	208.1	211.6	134.2	384	299.8	367.9	539.6
AT3G57150	45.5125	97.295	2.13776	Up	HOMOLOGUE OF NAP57 (NAP57)	Encodes a putative pseudouridine synthase (NAP57).	1.126e-05	45.03	46.38	34.94	55.7	79	78.53	86.55	145.1
AT3G12860	8.12875	17.1175	2.1058	Up		NOP56-like pre RNA processing ribonucleoprotein;(source:Araport11)	1.161e-05	8.98	8.93	5.135	9.47	14.12	15.83	16.39	22.13
AT5G65080	8.28275	1.66055	0.200483	Down	MADS AFFECTING FLOWERING 5 (MAF5)	Is upregulated during vernalization and regulates flowering time. Encodes MADS-domain protein. Two variants encoding proteins of 198 and 184 amino acids have been reported.	1.229e-05	6.577	5.484	7.74	13.33	3.231	1.192	1.393	0.8262
ATCG00740	23.03	70.3675	3.05547	Up	RNA POLYMERASE SUBUNIT ALPHA (RPOA)	RNA polymerase alpha subunit	1.316e-05	19.55	27.82	25.91	18.84	56.81	43.15	49.81	131.7
AT5G22920	41.2875	99.9325	2.42041	Up	RING ZINC-FINGER PROTEIN 34 (RZPF34)	Encodes a protein with sequence similarity to RING, zinc finger proteins. Loss of function mutations show reduced (15%) stomatal aperture under non stress conditions.	1.317e-05	62.64	39.35	29.39	33.77	59.63	101.6	102.6	135.9
AT2G03850	110.425	60.365	0.546661	Down		Late embryogenesis abundant protein (LEA) family protein;(source:Araport11)	1.362e-05	112.4	111.6	102.1	115.6	57.82	59.31	71.74	52.59
AT1G79780	159.15	74.0725	0.465426	Down	CASP-LIKE PROTEIN 3A2 (CASPL3A2)	Uncharacterized protein family (UPF0497);(source:Araport11)	1.372e-05	143.2	122.1	214.7	156.6	72.92	69.97	82.37	71.03
AT1G72920	0.281925	1.316	4.66791	Up		Toll-Interleukin-Resistance (TIR) domain family protein;(source:Araport11)	1.514e-05	0.2321	0.1976	0.3736	0.3244	1.075	1.943	0.986	1.26
AT3G14452	216.325	87.9775	0.406691	Down		transmembrane protein;(source:Araport11)	1.514e-05	214	211	155.3	285	70.32	126.7	93.93	60.96
AT3G55980	2.3985	6.15575	2.5665	Up	SALT-INDUCIBLE ZINC FINGER 1 (SZF1)	salt-inducible zinc finger 1;(source:Araport11)	1.751e-05	2.875	2.508	1.8	2.411	3.808	6.222	5.45	9.143
AT3G28780	127.82	40.83	0.319434	Down		transmembrane protein, putative (DUF1216);(source:Araport11)	2.049e-05	99.68	114.8	120	176.8	71.54	41.4	26.52	23.86
AT5G27120	31.68	65.26	2.05997	Up		SAR DNA-binding protein, putative, strong similarity to SAR DNA-binding protein-1 (Pisum sativum) GI:3132696; contains Pfam profile PF01798: Putative snoRNA binding domain; has similarity to MAR binding NOP58 protein The mRNA is cell-to-cell mobile.	2.049e-05	32.03	34.07	25.34	35.28	50.6	57.4	54.87	98.17
AT3G06100	28.24	13.2975	0.470875	Down	NOD26-LIKE INTRINSIC PROTEIN 7;1 (NIP7;1)	Encodes NIP7;1, an anther-specific boric acid transporter of the aquaporin superfamily regulated by an unusual tyrosine in helix 2 of the transport pore.	2.149e-05	31.6	29.37	19.69	32.3	10.92	16.54	10.12	15.61
ATCG00120	71.87	201.7	2.80646	Up	ATP SYNTHASE SUBUNIT ALPHA (ATPA)	Encodes the ATPase alpha subunit, which is a subunit of ATP synthase and part of the CF1 portion which catalyzes the conversion of ADP to ATP using the proton motive force. This complex is located in the thylakoid membrane of the chloroplast.	2.326e-05	62.94	86.13	82.24	56.17	165.7	123.7	154.9	362.5
AT2G31980	243.65	109.425	0.449107	Down	PHYTOCYSTATIN 2 (CYS2)	PHYTOCYSTATIN 2;(source:Araport11)	2.35e-05	164.2	268.5	231.3	310.6	141.4	96.72	110.8	88.78
AT5G58980	38.62	21.6675	0.561044	Down	NEUTRAL CERAMIDASE3 (ATNCER3)	Neutral/alkaline non-lysosomal ceramidase;(source:Araport11)	2.452e-05	42.34	37.52	33.93	40.69	20.73	23.04	24.06	18.84
AT5G53190	32	17.3575	0.542422	Down	(SWEET3)	Nodulin MtN3 family protein;(source:Araport11)	2.604e-05	31.04	31.19	31.71	34.06	17.66	19.25	17.3	15.22
AT3G03910	20.71	10.5853	0.511118	Down	GLUTAMATE DEHYDROGENASE 3 (GDH3)	GDH3 encodes a member of the glutamate dehydrogenease family. Its expression is upregulated in response to cytokinin and it may play a role in the control of nitrogen metabolism in leaf development.	2.604e-05	21	22.82	14.59	24.43	9.457	9.764	10.96	12.16
AT1G21130	0.1357	0.834625	6.15052	Up	INDOLE GLUCOSINOLATE O-METHYLTRANSFERASE 4 (IGMT4)	O-methyltransferase family protein;(source:Araport11)	2.61e-05	0.2348	0.09997	0.1588	0.04923	0.4218	0.9274	0.8063	1.183
ATCG00130	58.8975	185.075	3.14232	Up	(ATPF)	ATPase F subunit.	2.913e-05	53.02	77.02	54.02	51.53	145.5	107	116.8	371
AT5G44400	51.4	28.8125	0.560554	Down	(ATBBE26)	FAD-binding Berberine family protein;(source:Araport11)	2.943e-05	53.87	51.19	48.52	52.02	25.74	26.58	34.45	28.48
AT2G34655	31.82	14.3668	0.451501	Down		hypothetical protein;(source:Araport11)	2.957e-05	24.77	36.01	30.68	35.82	16.67	15.7	15.7	9.397
AT2G32890	6.43025	2.10775	0.327787	Down	RALF-LIKE 17 (RALFL17)	Member of a diversely expressed predicted peptide family showing sequence similarity to tobacco Rapid Alkalinization Factor (RALF), and is believed to play an essential role in the physiology of Arabidopsis. Consists of a single exon and is characterized by a conserved C-terminal motif and N-terminal signal peptide. This gene is contained within a highly AT-rich repetitive sequence region.	2.974e-05	3.754	7.4	5.494	9.073	2.676	2.275	1.807	1.673
AT1G55490	69.9625	126.8	1.8124	Up	CHAPERONIN 60 BETA (CPN60B)	encodes the beta subunit of the chloroplast chaperonin 60, a homologue of bacterial GroEL. Mutants in this gene develops lesions on its leaves, expresses systemic acquired resistance (SAR) and develops accelerated cell death to heat shock stress. The protein has molecular chaperone activity for suppressing protein aggregation in vitro.	3.469e-05	83.9	75.75	56.97	63.23	106.3	115.2	127.8	157.9
AT1G66850	1532.75	815.575	0.532099	Down		Bifunctional inhibitor/lipid-transfer protein/seed storage 2S albumin superfamily protein;(source:Araport11)	3.572e-05	1415	1491	1668	1557	811.2	829.3	910.7	711.1
AT2G33690	195.725	66.1125	0.337783	Down		Late embryogenesis abundant protein, group 6;(source:Araport11)	3.708e-05	115.1	185.5	271	211.3	101.8	61.56	61.88	39.21
AT5G56550	4.4045	10.3298	2.34527	Up	OXIDATIVE STRESS 3 (OXS3)	Encodes OXIDATIVE STRESS 3 (OXS3)， involved in tolerance to heavy metals and oxidative stress.	3.714e-05	4.333	3.97	3.922	5.393	7.349	10.94	10.86	12.17
AT4G26110	35.015	61.395	1.75339	Up	NUCLEOSOME ASSEMBLY PROTEIN1;1 (NAP1;1)	Encodes a member of a small gene family of proteins with similarity to nucleosome assembly proteins.May function in nucleotide excision repair. Loss of function mutations have no obvious visible phenotypes but do seem to affect transcription of NER related genes. The mRNA is cell-to-cell mobile. Plants mutated in three ubiquitously expressed NAP1 genes (NAP1;1~NAP1;3) and organ-specifically expre…	3.741e-05	35.85	41.97	24.61	37.63	62.02	57.69	58.25	67.62
AT1G33610	0.836575	2.80325	3.35087	Up		Leucine-rich repeat (LRR) family protein;(source:Araport11)	3.741e-05	1.005	0.5718	1.08	0.6895	1.759	3.131	3.127	3.196
AT2G25150	3.53225	1.23725	0.350272	Down		HXXXD-type acyl-transferase family protein;(source:Araport11)	5.389e-05	3.699	3.448	2.227	4.755	1.095	1.275	1.012	1.567
AT4G04460	114.703	62.4325	0.544299	Down	PUTATIVE ASPARTIC PROTEINASE A3 (PASPA3)	Saposin-like aspartyl protease family protein;(source:Araport11)	5.428e-05	93.31	132	108.4	125.1	67.7	55.09	68.11	58.83
AT5G09840	6.56175	11.8525	1.8063	Up	MITOCHONDRIAL NUCLEASE2 (MNU2)	Putative endonuclease or glycosyl hydrolase;(source:Araport11)	5.53e-05	6.612	7.715	5.648	6.272	10.56	10.87	11.03	14.95
AT4G25630	68.225	117.325	1.71968	Up	FIBRILLARIN 2 (FIB2)	encodes a fibrillarin, a key nucleolar protein in eukaryotes which associates with box C/D small nucleolar RNAs (snoRNAs) directing 2'-O-ribose methylation of the rRNA. This gene also encodes a novel box C/D snoRNA, U60.2f in its fifth intron that accumulates in seedlings and that their targeted residue on the 25 S rRNA is methylated. The mRNA is cell-to-cell mobile.	5.872e-05	72.47	73.51	50.39	76.53	104.3	127.8	107.3	129.9
AT1G54870	19.86	8.12575	0.409152	Down	CHLOROPLAST ALDEHYDE REDUCTASE (CHLADR)	ChlADR is an aldehyde reductase that catalyzes the reduction of the aldehyde carbonyl groups on saturated and alpha,beta-unsaturated aldehydes with more than 5 carbons in vitro. The N-terminal region of this protein directs GFP to the chloroplast where where ChlADR likely helps to maintain the photosynthetic process by detoxifying reactive carbonyls formed during lipid peroxidation. In addition, …	6.626e-05	11.82	24.06	18.69	24.87	10.9	6.381	7.839	7.383
AT1G63660	35.6775	60.325	1.69084	Up		GMP synthase (glutamine-hydrolyzing), putative / glutamine amidotransferase;(source:Araport11)	7.003e-05	38.34	38.76	29.69	35.92	53.06	54.5	61.54	72.2
AT1G23650	157.225	67.545	0.429607	Down		hypothetical protein;(source:Araport11)	7.093e-05	145.7	174.2	94.1	214.9	63.58	68.99	67.46	70.15
AT1G71030	72.3125	148.575	2.05462	Up	MYB-LIKE 2 (MYBL2)	Encodes a putative myb family transcription factor. In contrast to most other myb-like proteins its myb domain consists of a single repeat. A proline-rich region potentially involved in transactivation is found in the C-terminal part of the protein. Its transcript accumulates mainly in leaves.	7.51e-05	79.91	51.09	90.95	67.3	115.6	146.7	169.8	162.2
ATCG00650	5.5685	15.52	2.78711	Up	RIBOSOMAL PROTEIN S18 (RPS18)	chloroplast-encoded ribosomal protein S18	7.51e-05	5.681	7.946	4.337	4.31	14.9	12.05	15.3	19.83
AT3G27473	0.817275	0.10824	0.13244	Down		Cysteine/Histidine-rich C1 domain family protein;(source:Araport11)	7.609e-05	1.796	0.487	0.7071	0.279	0.08966	0.08424	0.1699	0.08916
AT5G24240	9.04675	4.4585	0.492829	Down	(AtPI4Kgamma3)	Encodes PI4Kc3, localizes to the nucleus and has autophosphorylation activity, but no lipid kinase activity. Overexpression mutants display late-flowering phenotype.	8.719e-05	7.877	8.913	11.27	8.127	5.048	4.114	4.14	4.532
AT4G23810	0.452025	2.07702	4.59493	Up	(WRKY53)	member of WRKY Transcription Factor; Group III	8.975e-05	0.4568	0.6884	0.4024	0.2605	0.8271	2.487	1.587	3.407
AT2G37690	6.7985	12.2375	1.80003	Up		phosphoribosylaminoimidazole carboxylase, putative / AIR carboxylase;(source:Araport11)	9.673e-05	7.453	7.15	5.189	7.402	11.2	10.87	11.51	15.37
ATCG00570	203.6	533.6	2.62083	Up	PHOTOSYSTEM II REACTION CENTER PROTEIN F (PSBF)	PSII cytochrome b559	9.697e-05	182.4	236.4	251.6	144	437.5	342.6	438.5	915.8
AT4G28280	20.4725	4.72975	0.231029	Down	LORELEI-LIKE-GPI ANCHORED PROTEIN 3 (LLG3)	LORELEI-LIKE-GPI ANCHORED PROTEIN 3;(source:Araport11)	9.848e-05	16.36	17.62	29.95	17.96	9.056	5.617	2.574	1.672
AT3G29772	0.264225	0.0137425	0.0520106	Down		transposable_element_gene;(source:Araport11);pseudogene, similar to B1129H01.3, blastp match of 51%25 identity and 1.2e-59 P-value to GP|20161194|dbj|BAB90121.1||AP003370 B1129H01.3 {Oryza sativa (japonica cultivar-group)};(source:TAIR10)	0.0001002	0.4184	0.2888	0.2359	0.1138	0	0.05497	0	0
AT1G64790	23.4	43.4225	1.85566	Up	ILITHYIA (ILA)	ILITHYIA (ILA) is a HEAT repeat protein involved in plant immunity. The gene is also involved in systemic acquired resistance induced by P. syringae expressing avrRps4. Loss-of-function mutants of ILA caused pleiotropic defects in the mutant plants. The mutant plants are smaller in size and the leaves are serrated and yellow to light green in color. Required for bacterium-triggered stomatal closu…	0.0001002	24.01	28.83	21.83	18.93	40.9	35.12	41.69	55.98
ATCG00790	46.3725	148.218	3.19624	Up	RIBOSOMAL PROTEIN L16 (RPL16)	chloroplast gene encoding a ribosomal protein L16, which is a constituent of 50S large ribosomal subunit	0.0001008	45.28	54.84	47.03	38.34	105.2	77.08	99.19	311.4
AT5G61605	26.5125	11.8075	0.445356	Down	POLLEN COAT PROTEIN B CLASS ALPHA (PCP-BALPHA)	EMBRYO SURROUNDING FACTOR-like protein;(source:Araport11). Expressed in pollen and involved in pollen hydration on the stigma.	0.0001062	17.99	30.66	31.09	26.31	12.1	11.45	12.75	10.93
AT5G34790	1.11308	3.2485	2.91849	Up		transposable_element_gene;(source:Araport11);CACTA-like transposase family (Ptta/En/Spm), has a 2.9e-11 P-value blast match to At5g36655.1/81-333 CACTA-like transposase family (Ptta/En/Spm) (CACTA-element) (Arabidopsis thaliana);(source:TAIR10)	0.0001076	1.34	1.169	0.9533	0.99	2.04	2.595	2.866	5.493
AT4G28450	12.585	24.54	1.94994	Up		This gene is predicted to encode a protein with a DWD motif. It can bind to DDB1a in Y2H assays and may be involved in the formation of a CUL4-based E3 ubiquitin ligase	0.0001076	12.94	13.73	10.34	13.33	20.36	20.86	21.03	35.91
AT4G13495	15.55	30.01	1.9299	Up		other_RNA;(source:Araport11)	0.0001076	21.57	13.48	14.22	12.93	24.97	34.43	30.11	30.53
AT1G01780	45.1925	24.225	0.53604	Down	PLIM2B (PLIM2b)	Encodes a member of the Arabidopsis LIM proteins: a family of actin bundlers with distinct expression patterns. WLIM1, WLIM2a, and WLIM2b are widely expressed, whereas PLIM2a, PLIM2b, and PLIM2c are predominantly expressed in pollen. Regulates actin cytoskeleton organization. The mRNA is cell-to-cell mobile.	0.0001092	37.73	45.8	47.2	50.04	28.33	23.32	21.71	23.54
AT5G09500	270.5	139.762	0.516682	Down		Ribosomal protein S19 family protein;(source:Araport11)	0.0001105	269.2	278	210.8	324	146.1	170.3	145.4	97.25
AT4G16630	7.345	14.0475	1.91253	Up		DEA(D/H)-box RNA helicase family protein;(source:Araport11)	0.0001105	7.419	7.399	6.966	7.596	11.67	11.86	12.56	20.1
AT5G14520	45.73	76.81	1.67964	Up	PESCADILLO (PES)	Encodes a nucleolar protein that plays an essential role in cell growth and survival through its regulation of ribosome biogenesis and mitotic progression.	0.0001105	46.46	48.6	44.83	43.03	71.32	70.36	72.42	93.14
AT1G23520	33.1425	17.09	0.515652	Down		hypothetical protein (DUF220);(source:Araport11)	0.0001105	30.48	36.78	28.19	37.12	19.59	17.59	19.05	12.13
AT5G39532	5.3925	0.8615	0.159759	Down		Pseudogene of AT3G59455	0.0001105	2.644	7.428	6.742	4.756	1.243	1.168	1.035	0
AT4G13960	12.3122	4.672	0.379459	Down		F-box/RNI-like superfamily protein;(source:Araport11)	0.0001121	7.715	16.67	9.594	15.27	5.658	5.055	5.027	2.948
AT4G08300	0.475875	0.0373975	0.0785868	Down	USUALLY MULTIPLE ACIDS MOVE IN AND OUT TRANSPORTERS 17 (UMAMIT17)	nodulin MtN21-like transporter family protein	0.0001145	0.1341	0.3059	0.6441	0.8194	0.01377	0.09314	0.04268	0
AT1G48920	231.325	435.95	1.88458	Up	NUCLEOLIN LIKE 1 (NUC-L1)	Encodes ATNUC-L1 (NUCLEOLIN LIKE 1), the predominant form of the two nucleolin proteins found in Arabidopsis. This protein is involved in rRNA processing, ribosome biosynthesis, and vascular pattern formation. PARL1 localizes to the nucleolus and parl1 mutants accumulate elevated levels of the unspliced 35S pre-rRNA. parl1 mutants also have defects in cotyledon, leaf, sepal, and petal vein patter…	0.0001222	232.2	267.7	174	251.4	393.9	377.4	379.7	592.8
AT1G62560	4.36425	9.197	2.10735	Up	FLAVIN-MONOOXYGENASE GLUCOSINOLATE S-OXYGENASE 3 (FMO GS-OX3)	belongs to the flavin-monooxygenase (FMO) family, encodes a glucosinolate S-oxygenase that catalyzes the conversion of methylthioalkyl glucosinolates to methylsulfinylalkyl glucosinolates The mRNA is cell-to-cell mobile.	0.0001235	4.147	4.193	2.864	6.253	8.595	9.783	8.596	9.814
AT2G29800	0.877775	0.226925	0.258523	Down		Galactose oxidase/kelch repeat superfamily protein;(source:Araport11)	0.0001235	0.8666	0.9939	0.82	0.8306	0.1779	0.3009	0.3152	0.1137
AT4G18440	10.1565	17.7225	1.74494	Up		L-Aspartase-like family protein;(source:Araport11)	0.0001235	11.33	11.33	9.594	8.372	18.39	17.96	19.08	15.46
AT1G69490	3.8405	10.4753	2.72757	Up	NAC-LIKE, ACTIVATED BY AP3/PI (NAP)	Encodes a member of the NAC transcription factor gene family. It is expressed in floral primordia and upregulated by AP3 and PI. Its expression is associated with leaf senescence. The mRNA is cell-to-cell mobile.	0.0001277	3.461	2.547	5.757	3.597	7.191	10.67	12.65	11.39
AT5G24280	5.56175	11.5418	2.0752	Up	GAMMA-IRRADIATION AND MITOMYCIN C INDUCED 1 (GMI1)	Encodes GMI1, a structural-maintenance-of-chromosomes-hinge domain-containing protein. Involved in somatic homologous recombination.	0.0001298	6.032	6.439	4.248	5.528	9.272	9.33	9.415	18.15
AT5G42170	14.7605	3.3125	0.224417	Down		SGNH hydrolase-type esterase superfamily protein;(source:Araport11)	0.0001318	8.302	16.14	12.98	21.62	6.59	3.715	1.698	1.247
AT4G19200	150.775	86.9	0.576355	Down	GLYCINE AND PROLINE RICH PROTEIN 3 (GPRP3)	Glycine and proline rich protein.Mutants have increased size.	0.0001358	140.7	143.4	138.6	180.4	96.56	86.68	79.04	85.32
AT4G15760	0.2755	1.1777	4.27477	Up	MONOOXYGENASE 1 (MO1)	Encodes a protein with similarity to monooxygenases that are known to degrade salicylic acid (SA).	0.0001358	0.4689	0.1612	0.2299	0.242	0.6738	1.074	1.131	1.832
AT1G30240	14.04	23.96	1.70655	Up		proline-, glutamic acid/leucine-rich protein;(source:Araport11)	0.0001389	14.98	14.93	12.94	13.31	22.69	21.12	22.51	29.52
AT3G57520	104.262	216.3	2.07457	Up	SEED IMBIBITION 2 (SIP2)	SIP2 encodes a raffinose-specific alpha-galactosidase that catalyzes the breakdown of raffinose into alpha-galatose and sucrose. This enzyme may function in unloading raffinose from the phloem as part of sink metabolism. Although it was originally predicted to act as a raffinose synthase (RS), that activity was not observed for recombinant SIP2.	0.000139	150.7	123.1	76.03	67.22	175.5	229.8	231.7	228.2
AT5G34795	2.836	8.21075	2.89519	Up		pseudogene of K-box region protein (DUF1985);(source:Araport11)	0.000139	2.827	3.105	3.276	2.136	5.074	7.034	6.045	14.69
AT1G28330	158.4	331.725	2.09422	Up	DORMANCY-ASSOCIATED PROTEIN-LIKE 1 (DYL1)	dormancy-associated protein (DRM1)	0.0001446	223.6	114.6	164.6	130.8	242.6	359.9	416.2	308.2
ATCG00560	79.6975	203.475	2.55309	Up	PHOTOSYSTEM II REACTION CENTER PROTEIN L (PSBL)	PSII L protein	0.0001489	71.1	87.95	95.67	64.07	171.5	128.7	163.7	350
AT5G07230	732.925	407.7	0.556264	Down	Bifunctional inhibitor/lipid-transfer protein/seed storage 2S albumin superfamily protein (araport11).	Tapetum specific gene.	0.0001532	845.3	676.9	605.7	803.8	391.8	496.1	396.4	346.5
AT4G30990	7.40675	15.7575	2.12745	Up		ARM repeat superfamily protein;(source:Araport11)	0.0001534	7.898	8.976	5.439	7.314	11.72	12.84	12.61	25.86
AT1G80160	23.925	9.42775	0.394054	Down	GLYOXYLASE I 7 (GLYI7)	Vicinal oxygen chelate (VOC) superfamily member.	0.0001534	21.64	18.82	36.39	18.85	12.62	10.19	8.163	6.738
AT5G49448	1.785	5.06	2.83473	Up			0.0001534	2.571	2.137	0.952	1.48	5.18	4.621	4.336	6.103
AT5G49450	1.785	5.06	2.83473	Up	BASIC LEUCINE-ZIPPER 1 (bZIP1)	Encodes a transcription activator is a positive regulator of plant tolerance to salt, osmotic and drought stresses.	0.0001534	2.571	2.137	0.952	1.48	5.18	4.621	4.336	6.103
AT1G21680	25.76	41.905	1.62675	Up		DPP6 N-terminal domain-like protein;(source:Araport11)	0.0001547	27.4	26.04	23.66	25.94	41.22	37.11	45.98	43.31
AT2G27840	27.3025	48.66	1.78225	Up	(HDT4)	Belongs to the plant specific HD2 type proteins; similar to nucleolar Zea mays histone deacetylase; HD2-p39	0.0001627	28.93	32.46	21.67	26.15	39.39	54.59	42.81	57.85
AT5G47635	42.6775	21.9675	0.514733	Down		Pollen Ole e 1 allergen and extensin family protein;(source:Araport11)	0.0001633	39.85	37.26	52.41	41.19	19.98	24.04	25.74	18.11
AT4G04940	16.3575	28.055	1.71512	Up		transducin family protein / WD-40 repeat family protein;(source:Araport11)	0.0001676	18.51	18.06	11	17.86	25.39	28.06	27.05	31.72
AT3G11830	47.3775	80.6275	1.70181	Up	CHAPERONIN CONTAINING T-COMPLEX POLYPEPTIDE-1 SUBUNIT 7 (CCT7)	TCP-1/cpn60 chaperonin family protein;(source:Araport11)	0.0001685	52.99	58.18	35	43.34	79.95	69.29	87.1	86.17
AT1G72910	0.333125	1.32193	3.96826	Up		Nucleotide-binding, leucine-rich repeat (NLR) gene regulated by nonsense-mediated mRNA decay (NMD) genes UPF1 and UPF3.	0.0001685	0.5926	0.2854	0.259	0.1955	0.8237	1.582	1.183	1.699
AT1G29900	20.9925	37.3625	1.7798	Up	CARBAMOYL PHOSPHATE SYNTHETASE B (CARB)	Encodes carbamoyl phosphate synthetase (CPS) large subunit (CARB), also named as VEN3. Heterologous expression of the Arabidopsis VEN3 and VEN6 genes in a CPS-deficient Escherichia coli strain fully restored bacterial growth in minimal medium, demonstrating the enzymatic activity of the VEN3 and VEN6 proteins.	0.0001689	22.41	24.17	16.49	20.9	31.99	30.11	37.24	50.11
AT3G20440	9.84925	19.755	2.00574	Up	EMBRYO DEFECTIVE 2729 (EMB2729)	Encodes BE1, a putative glycoside hydrolase. Involved in organogenesis and somatic embryogenesis by regulating carbohydrate metabolism. Mutation in BE1 has pleotrophic effect on the whole plant development.	0.0001689	13.33	10.86	6.23	8.977	15.45	18.47	18.1	27
ATCG00670	51.57	131.947	2.55861	Up	PLASTID-ENCODED CLP P (PCLPP)	Encodes the only ClpP (caseinolytic protease) encoded within the plastid genome. Contains a highly conserved catalytic triad of Ser-type proteases (Ser-His-Asp). Part of the 350 kDa chloroplast Clp complex. The name reflects nomenclature described in Adam et. al (2001).	0.0001689	50.56	58.97	50.51	46.24	101.2	84.31	92.08	250.2
AT3G19170	35.3275	60.615	1.7158	Up	PRESEQUENCE PROTEASE 1 (PREP1)	Zinc metalloprotease pitrilysin subfamily A. Signal peptide degrading enzyme targeted to mitochondria and chloroplasts. Expressed only in siliques and flowers	0.0001689	35.37	39.98	32.19	33.77	57.27	48.56	60.68	75.95
AT3G50930	0.3643	1.13865	3.12558	Up	CYTOCHROME BC1 SYNTHESIS (BCS1)	Encodes a protein that is present in a homo-multimeric protein complex on the outer mitochondrial membrane and plays a role in cell death and amplifying salicylic acid signalling. The mRNA is cell-to-cell mobile.	0.0001698	0.4599	0.4576	0.2492	0.2905	1.27	1.524	0.9311	0.8295
AT5G40730	214.55	69.175	0.322419	Down	ARABINOGALACTAN PROTEIN 24 (AGP24)	Encodes an arabinogalactan-protein (AGP24).	0.0001702	124.4	151.3	408	174.5	94.9	70.82	60.38	50.6
AT3G45730	0.264675	1.65068	6.23661	Up		hypothetical protein;(source:Araport11)	0.0001719	0.4118	0.2338	0.1061	0.307	0.6247	2.78	1.138	2.06
AT3G49300	7.86975	2.624	0.333429	Down		proline-rich family protein;(source:Araport11)	0.0001738	6.403	7.211	10.69	7.175	2.259	1.91	2.809	3.518
AT5G15960	148.075	83.21	0.561945	Down	(KIN1)	cold and ABA inducible protein kin1, possibly functions as an anti-freeze protein. Transcript level of this gene is induced by cold, ABA, dehydration and osmoticum (mannitol). However, protein activity of GUS fused to the promoter of this gene is inhibited by cold treatment, suggesting an inhibition of the protein by increased transcript level.	0.0001787	138	144.6	141	168.7	94.5	85.5	87.11	65.73
ATCG00510	20.985	59.895	2.85418	Up	PHOTSYSTEM I SUBUNIT I (PSAI)	Encodes subunit I of photosystem I.	0.0001787	22.27	25.81	21.04	14.82	57.91	36.47	49.33	95.87
AT1G15350	31.635	13.574	0.429082	Down		DUF4050 family protein;(source:Araport11)	0.000179	26.09	30.02	35.2	35.23	20.56	13.02	12.38	8.336
AT4G30850	47.515	22.5725	0.475061	Down	HEPTAHELICAL TRANSMEMBRANE PROTEIN2 (HHP2)	heptahelical transmembrane protein homologous to human adiponectin receptors and progestin receptors	0.0001791	33.96	50.73	55.79	49.58	29.75	21	22.69	16.85
AT1G29010	18.86	8.792	0.466172	Down	TCP INTERACTOR CONTAINING EAR MOTIF PROTEIN 3 (TIE3)	verprolin;(source:Araport11)	0.0001791	13.75	18.71	21.93	21.05	11.25	8.349	8.124	7.445
ATCG00065	67.02	188.7	2.81558	Up	RIBOSOMAL PROTEIN S12A (RPS12A)	chloroplast gene encoding ribosomal protein s12. The gene is located in three distinct loci on the chloroplast genome and is transpliced to make one transcript.	0.0001792	53.61	79.6	70.13	64.74	156.3	108.2	130.8	359.5
AT5G20410	7.787	3.035	0.389752	Down	MONOGALACTOSYLDIACYLGLYCEROL SYNTHASE 2 (MGD2)	Encodes a type B monogalactosyldiacylglycerol (MGDG) synthase. Strongly induced by phosphate deprivation, and in non-photosynthetic tissues. Does not contribute to galactolipid synthesis under Pi-sufficient conditions but does under Pi starvation.	0.0001826	6.384	6.744	10.14	7.88	4.097	3.614	2.635	1.794
AT1G52680	277.325	112.362	0.405165	Down		late embryogenesis abundant protein-related / LEA protein-like protein;(source:Araport11)	0.0001847	183.4	311.7	349.7	264.5	172	107.2	102.3	67.95
AT1G23570	130.175	76.645	0.588784	Down		hypothetical protein (DUF220);(source:Araport11)	0.0001901	143.1	146.3	103.7	127.6	75.28	82.21	82.04	67.05
ATCG00280	113.343	286.575	2.5284	Up	PHOTOSYSTEM II REACTION CENTER PROTEIN C (PSBC)	chloroplast gene encoding a CP43 subunit of the photosystem II reaction center. promoter contains a blue-light responsive element.	0.0001901	106.5	132.1	120.3	94.47	246	159.4	220.4	520.5
AT1G29940	14.0975	25.7275	1.82497	Up	NUCLEAR RNA POLYMERASE A2 (NRPA2)	Encodes a subunit of RNA polymerase 1 (aka RNA polymerase A).	0.0001929	15.11	16.73	10.45	14.1	21.62	22.93	22.47	35.89
AT2G34357	6.47525	12.0525	1.86132	Up		ARM repeat superfamily protein;(source:Araport11)	0.000195	6.781	7.983	5.265	5.872	10.72	10.13	10.59	16.77
AT1G74930	0.39885	1.7305	4.33872	Up	(ORA47)	encodes a member of the DREB subfamily A-5 of ERF/AP2 transcription factor family. The protein contains one AP2 domain. There are 15 members in this subfamily including RAP2.1, RAP2.9 and RAP2.10. The mRNA is cell-to-cell mobile.	0.0001952	0.3757	0.1152	0.3484	0.7561	1.792	2.082	1.618	1.43
AT4G03370	1.198	0.337725	0.281907	Down		Ubiquitin family protein;(source:Araport11)	0.0002004	1.274	1.29	1.134	1.094	0.2233	0.3021	0.346	0.4795
AT3G16150	13.0177	4.77075	0.36648	Down	ASPARAGINASE B1 (ASPGB1)	Encodes an asparaginase that catalyzes the degradation of L-asparagine to L-aspartic acid and ammonia. The mRNA is cell-to-cell mobile.	0.0002013	6.251	13.89	10.37	21.56	4.817	4.741	5.089	4.436
AT5G13990	6.79075	3.191	0.469904	Down	EXOCYST SUBUNIT EXO70 FAMILY PROTEIN C2 (EXO70C2)	A member of EXO70 gene family, putative exocyst subunits, conserved in land plants. Arabidopsis thaliana contains 23 putative EXO70 genes, which can be classified into eight clusters on the phylogenetic tree. This particular member is expressed in pollen and is involved in pollen tube elongation. Found in the cytoplasm and surprisingly, not found in the plasma membrane and is not found to colocal…	0.0002036	5.536	7.883	7.471	6.273	4.059	2.486	2.931	3.288
AT1G24600	130.582	69.3275	0.53091	Down		hypothetical protein;(source:Araport11)	0.0002036	153.2	124.1	90.83	154.2	63.6	80.05	75.49	58.17
AT3G23940	22.7175	39.72	1.74843	Up	DIHYDROXYACID DEHYDRATASE (DHAD)	Encodes a member of the dihydroxyacid dehydrates family of proteins that encode enzymes involved in branched chain amino acid biosynthesis. Loss of function mutations have significantly reduced transmission and fertility due to defects in male and female gametophyte development and embryo lethality. Mutants have increased sensitivity to abiotic stressors which may be partially compensated by addi…	0.0002036	26.57	24.56	21.24	18.5	34.57	33.82	41.07	49.42
AT2G18900	14.8525	26.1925	1.76351	Up		Transducin/WD40 repeat-like superfamily protein;(source:Araport11)	0.0002111	15.9	17.55	11.4	14.56	23.1	22.75	24.5	34.42
AT5G67550	14.0628	6.02075	0.428135	Down		transmembrane protein;(source:Araport11)	0.0002111	9.721	15.59	18.92	12.02	7.735	5.369	6.672	4.307
AT5G45880	164.45	59.78	0.363515	Down		Pollen Ole e 1 allergen and extensin family protein;(source:Araport11)	0.0002126	141.9	186.6	177.9	151.4	106.1	60.2	44.47	28.35
AT1G02040	11.6535	5.43825	0.466662	Down		C2H2-type zinc finger family protein;(source:Araport11)	0.0002155	9.494	13.01	11.3	12.81	6.71	5.777	4.717	4.549
AT3G25221	100.028	43.4275	0.434156	Down		hypothetical protein;(source:Araport11)	0.0002155	80.67	100.3	76.14	143	46.45	49.5	36.19	41.57
AT4G15200	9.88675	3.90025	0.394493	Down	FORMIN 3 (FH3)	Actin nucleation factor that directs the formation of actin cables in pollen tubes. Involved in cytoplasmic streaming and polarized growth in pollen tubes.	0.0002155	9.367	11.87	6.89	11.42	6.135	3.626	3.754	2.086
AT1G10490	13.0725	21.38	1.63549	Up		GNAT acetyltransferase (DUF699);(source:Araport11)	0.0002222	14.55	14.76	10.38	12.6	19.55	20.34	20.85	24.78
AT5G24090	11.7825	5.476	0.464757	Down	CHITINASE A (CHIA)	Chitinase A (class III) expressed exclusively under environmental stress conditions. Shown be a plant lysozyme involved in plant immunity.	0.0002222	12.04	10.89	12.99	11.21	6.805	5.196	6.035	3.868
AT3G15400	1708.75	890.125	0.520922	Down	ANTHER 20 (ATA20)	Encodes a protein with novel repeat sequences and a glycine-rich domain which has a 53% identity to GRP1, a petunia glycine-rich cell wall protein. DYT1 and bHLH089 specifically recognize the TCATGTGC box to activate expression.	0.0002222	1718	1640	1807	1670	929.1	930.3	1046	655.1
AT3G12143	46.375	22.6375	0.48814	Down		pseudogene of Leucine-rich repeat (LRR) family protein;(source:Araport11)	0.0002222	48.2	38.42	59.99	38.89	25.28	22	26.54	16.73
AT2G28355	35.9075	13.5105	0.376258	Down	LOW-MOLECULAR-WEIGHT CYSTEINE-RICH 5 (LCR5)	low-molecular-weight cysteine-rich 5;(source:Araport11)	0.0002257	21.85	39.4	35.92	46.46	21.27	10.7	9.022	13.05
AT3G52140	50.5225	87.9225	1.74026	Up	NON RESPONDING TO OXYLIPINS 38 (NOXY38)	Involved in regulating mitochondrial quality control. Regulates mitochondrial association time and thereby is involved in mitochondrial fusion. Mutants show unregulated autophagy and display transcriptomic markers of mitochondrial stress. Its activity can be modulated by Lys acetylation.	0.0002348	51.59	55.4	44.77	50.33	77.09	75.75	81.15	117.7
AT5G24105	112.032	37.9675	0.338897	Down	ARABINOGALACTAN PROTEIN 41 (AGP41)	Encodes a putative arabinogalactan-protein (AGP41).	0.0002348	108.2	101.8	141	97.13	63.71	40.22	33.59	14.35
ATCG00520	10.4755	33.7675	3.22347	Up	(YCF4)	Encodes a protein required for photosystem I assembly and stability. In cyanobacteria, loss of function mutation in this gene increases PSII/PSI ratio without any influence on photoautotrophic growth.	0.0002378	10.74	13.49	8.125	9.547	22.68	18.43	21.39	72.57
AT5G53048	7.14125	2.90275	0.406476	Down		Natural antisense transcript overlaps with AT5G53050;(source:Araport11)	0.0002455	8.062	5.308	7.705	7.49	2.139	3.403	3.491	2.578
AT1G78140	123.125	69.6525	0.565706	Down		S-adenosyl-L-methionine-dependent methyltransferases superfamily protein;(source:Araport11)	0.0002463	128.1	122.1	103.9	138.4	70.76	81.21	74.74	51.9
AT1G60350	0.38105	0.028565	0.0749639	Down	NAC DOMAIN CONTAINING PROTEIN 24 (NAC024)	NAC domain containing protein 24;(source:Araport11)	0.0002495	0.3725	0.4208	0.5147	0.2162	0.08235	0	0.03191	0
ATCG00170	6.33575	20.4175	3.22259	Up	(RPOC2)	RNA polymerase beta' subunit-2	0.0002519	6.109	7.777	6.516	4.941	13.04	10.81	12.72	45.1
AT3G41979	144.3	395.5	2.74082	Up		5.8SrRNA	0.0002568	67.8	209.1	151.9	148.4	428.3	269.5	274	610.2
AT2G40960	9.67025	16.495	1.70575	Up		Single-stranded nucleic acid binding R3H protein;(source:Araport11)	0.0002612	10.4	9.747	9.353	9.181	16.6	18.07	15.45	15.86
AT3G23770	89.14	45.6875	0.512536	Down		O-Glycosyl hydrolases family 17 protein;(source:Araport11)	0.0002645	97.11	84.39	100.4	74.66	37.14	52.79	32.34	60.48
AT5G64060	5.15175	9.1335	1.77289	Up	NAC DOMAIN CONTAINING PROTEIN 103 (NAC103)	NAC domain containing protein 103;(source:Araport11)	0.0002657	5.618	5.625	4.402	4.962	8.73	9.271	8.743	9.79
AT1G56110	132.875	240.775	1.81204	Up	HOMOLOG OF NUCLEOLAR PROTEIN NOP56 (NOP56)	NOP56-like protein	0.0002736	128.4	135.9	110.9	156.3	197.8	211	219	335.3
AT5G07550	5613.75	2498	0.444979	Down	GLYCINE-RICH PROTEIN 19 (GRP19)	member of Oleosin-like protein family	0.0002736	4973	5224	7637	4621	2808	2473	3057	1654
ATCG01130	1.74175	5.74875	3.30056	Up	(YCF1.2)	Ycf1 protein;(source:Araport11)	0.0002736	1.64	1.847	2.008	1.472	3.58	3.121	3.514	12.78
AT1G62280	0.315352	0.0092925	0.029467	Down	SLAC1 HOMOLOGUE 1 (SLAH1)	Encodes a protein with ten predicted transmembrane helices. The SLAH1 protein has similarity to the SLAC1 protein involved in ion homeostasis in guard cells. Although it is not expressed in guard cells, it can complement a slac1-2 mutant suggesting that it performs a similar function. SLAH1:GFP localizes to the plasma membrane.	0.0002736	0.4565	0.02591	0.5408	0.2382	0.01458	0	0.02259	0
ATCG00380	14.43	49.3475	3.41979	Up	CHLOROPLAST RIBOSOMAL PROTEIN S4 (RPS4)	Chloroplast encoded ribosomal protein S4	0.0002736	12.73	18.2	13.35	13.44	31.86	23.13	30.2	112.2
AT3G10530	8.06875	13.72	1.70039	Up		Transducin/WD40 repeat-like superfamily protein;(source:Araport11)	0.0002736	8.947	9.604	5.989	7.735	12.52	13.84	13.3	15.22
AT5G07560	4064.25	1700	0.418281	Down	GLYCINE-RICH PROTEIN 20 (GRP20)	Lipid-binding oleosins, glycine-rich protein.	0.0002736	3616	3696	5713	3232	1959	1688	2146	1007
AT3G05790	3.11675	6.0255	1.93326	Up	LON PROTEASE 4 (LON4)	Encodes a member of the Lon protease-like proteins (Lon1/At5g26860, Lon2/At5g47040, Lon3/At3g05780, Lon4/At3g05790). Lon is a multifunctional ATP-dependent protease which exists in bacteria, archaea and within organelles in eukaryotic cells. Lon proteases are responsible for the degradation of abnormal, damaged and unstable proteins.	0.0002736	3.544	3.592	2.486	2.845	4.876	5.095	6.044	8.087
AT5G61610	25.525	13.725	0.537708	Down		Oleosin family protein;(source:Araport11)	0.0002789	24.13	24.19	28.39	25.39	13.35	11.1	16.46	13.99
AT3G46750	21.105	7.7305	0.366288	Down		low-temperature-induced protein;(source:Araport11)	0.0002789	16.78	23.14	27.06	17.44	13.3	8.069	4.791	4.762
AT4G14040	17.2875	30.4775	1.76298	Up	SELENIUM-BINDING PROTEIN 2 (SBP2)	selenium-binding protein 2;(source:Araport11)	0.0002812	19.75	18.42	10.67	20.31	28.27	31.95	32.29	29.4
ATCG00100	89.97	253.85	2.8215	Up	(TRNG.1)	tRNA-Gly	0.0002821	80.28	129.7	85.95	63.95	211.7	142	192	469.7
AT1G35880	0.005155	0.294075	57.0466	Up		hypothetical protein;(source:Araport11)	0.000289	0.02062	0	0	0	0.4741	0.1002	0.3368	0.2652
AT3G52130	1527	712.65	0.466699	Down		Bifunctional inhibitor/lipid-transfer protein/seed storage 2S albumin superfamily protein;(source:Araport11)	0.000289	1537	1257	1714	1600	681.9	974	770.8	423.9
AT1G25440	6.61075	13.0723	1.97742	Up	B-BOX DOMAIN PROTEIN 15 (BBX15)	B-box type zinc finger protein with CCT domain-containing protein;(source:Araport11)	0.000289	7.324	6.706	5.233	7.18	9.973	9.896	13.75	18.67
AT3G01328	11.5585	2.35075	0.203378	Down		Encodes a ECA1 gametogenesis related family protein	0.0002957	7.445	13.09	7.259	18.44	5.098	1.703	1.138	1.464
AT1G18280	580.675	297.05	0.51156	Down	GLYCOSYLPHOSPHATIDYLINOSITOL-ANCHORED LIPID PROTEIN TRANSFER 3 (LTPG3)	Bifunctional inhibitor/lipid-transfer protein/seed storage 2S albumin superfamily protein;(source:Araport11)	0.0002957	459.8	627	632	603.9	364.3	285.7	327.8	210.4
AT5G45095	0.77625	2.03275	2.61868	Up		hypothetical protein;(source:Araport11)	0.0002992	0.9608	0.86	0.4854	0.7988	1.912	2.455	2.201	1.563
AT4G25590	38.2325	18.19	0.475773	Down	ACTIN DEPOLYMERIZING FACTOR 7 (ADF7)	actin depolymerizing factor 7;(source:Araport11)	0.0003005	31.94	44.86	43.59	32.54	24.84	13.87	18.95	15.1
AT5G55920	15.295	26.2075	1.71347	Up	OLIGOCELLULA 2 (OLI2)	Encodes a homolog of the S. cerevisiae Nop2 that is involved in ribosome biogenesis and plays a role on organ size control by promoting cell proliferation and preventing compensation in normal leaf development.	0.0003051	14.9	16.24	16.74	13.3	23.78	23.73	26.24	31.08
AT3G15630	29.26	56.635	1.93558	Up		plant/protein;(source:Araport11)	0.0003077	42.17	24.36	23.72	26.79	39.68	63.1	63.16	60.6
AT3G10020	21.1575	44.81	2.11793	Up	HYPOXIA RESPONSE UNKNOWN PROTEIN 26 (HUP26)	plant/protein;(source:Araport11)	0.0003077	30.72	15.61	17.21	21.09	30.96	40.43	44.77	63.08
AT5G37810	17.7175	8.26725	0.466615	Down	NOD26-LIKE INTRINSIC PROTEIN 4;1 (NIP4;1)	NOD26-like intrinsic protein 4;(source:Araport11)	0.0003077	14.56	17.97	18.22	20.12	10.35	8.146	8.992	5.581
AT2G16570	4.7535	8.55475	1.79967	Up	GLN PHOSPHORIBOSYL PYROPHOSPHATE AMIDOTRANSFERASE 1 (ASE1)	Amidophosphoribosyltransferase (ATase: EC 2.4.2.14) is a key enzyme in the pathway of purine nucleotide biosynthesis	0.0003083	4.603	5.44	4.75	4.221	8.162	7.442	9.528	9.087
AT4G33870	13.875	7.38725	0.532414	Down		Peroxidase superfamily protein;(source:Araport11)	0.0003097	14.58	12.87	15.87	12.18	6.767	7.205	7.483	8.094
AT1G30680	7.47325	14.085	1.88472	Up	ARABIDOPSIS TWINKLE HOMOLOG (ATH)	Twinkle is a dual localized (mitochondria and chloroplast) DNA primase-helicase. It synthesizes RNA primers from a 5′ -(G/C)GGA-3′ template, where the last two 3' nucleotides are cryptic. Mitochondrial protein involved in DNA replication which binds to DNA polymerases, Pol1A and Pol1B.	0.0003127	8.374	8.589	5.609	7.321	10.96	11.68	13.34	20.36
AT1G18960	20.565	10.5103	0.511075	Down		myb-like HTH transcriptional regulator family protein;(source:Araport11)	0.0003197	21.08	19.45	21.04	20.69	10.39	14.68	8.91	8.061
AT3G48450	15.295	6.451	0.421772	Down		RPM1-interacting protein 4 (RIN4) family protein;(source:Araport11)	0.0003197	16.49	11.75	17.72	15.22	7.819	7.607	4.433	5.945
AT5G51200	16.0525	26.405	1.64492	Up	EMBRYO DEFECTIVE 3142 (EMB3142)	Originally identified as EDS4, enhanced disease sensitive phenotype and subsequently cloned and identified as NUCLEOPORIN205. Affects circadian clock and downstream genes including those involved in defense response.	0.0003197	17.08	18.63	13.94	14.56	24.71	22.46	26.33	32.12
AT1G27730	2.029	5.745	2.83144	Up	SALT TOLERANCE ZINC FINGER (STZ)	Related to Cys2/His2-type zinc-finger proteins found in higher plants. Compensated for a subset of calcineurin deficiency in yeast. Salt tolerance produced by ZAT10 appeared to be partially dependent on ENA1/PMR2, a P-type ATPase required for Li+ and Na+ efflux in yeast. The protein is localized to the nucleus, acts as a transcriptional repressor and is responsive to chitin oligomers. Also involv…	0.0003223	2.04	1.681	2.485	1.91	4.483	8.625	3.711	6.161
AT2G38340	0.0475625	0.59335	12.4752	Up	DEHYDRATION RESPONSE ELEMENT-BINDING PROTEIN 19 (DREB19)	encodes a member of the DREB subfamily A-2 of ERF/AP2 transcription factor family. The protein contains one AP2 domain. There are eight members in this subfamily including DREB2A AND DREB2B that are involved in response to drought.	0.0003231	0.1386	0	0	0.05165	0.3983	0.8233	0.3201	0.8317
ATCG01100	25.2375	65.2175	2.58415	Up	(NDHA)	NADH dehydrogenase ND1	0.0003238	24.88	27.85	31.49	16.73	54.15	38.65	51.57	116.5
AT3G10690	13.985	23.49	1.67966	Up	DNA GYRASE A (GYRA)	Encodes a protein that when expressed together with GYRB2 generates an active supercoiling DNA gyrase enzyme that shares similar properties to its bacterial counterpart, including sensitivity to gyrase-specific antibiotics.	0.0003238	15.55	16.22	11.93	12.24	21.09	20.54	23.57	28.76
AT3G46270	0.352725	0.0794875	0.225353	Down		receptor protein kinase-like protein;(source:Araport11)	0.0003262	0.3552	0.422	0.2873	0.3464	0.07123	0.1004	0.06133	0.08499
ATCG00730	52.2725	125.36	2.3982	Up	PHOTOSYNTHETIC ELECTRON TRANSFER D (PETD)	A chloroplast gene encoding subunit IV of the cytochrome b6/f complex	0.0003289	44.73	59.93	65.82	38.61	109.8	78.44	104.3	208.9
AT5G61620	3.46075	1.27475	0.368345	Down		myb-like transcription factor family protein;(source:Araport11)	0.0003359	2.921	3.398	3.838	3.686	1.579	1.019	1.385	1.116
AT1G24620	1.3723	0.317995	0.231724	Down	CALMODULIN LIKE 25 (CML25)	Encodes a EF-hand calcium-binding protein family member. Mutants exhibit longer root hairs under phosphate-deficient conditions.	0.0003367	1.568	0.9422	1.432	1.547	0.5036	0.3586	0.3149	0.09488
AT5G63420	17.9825	32.22	1.79174	Up	EMBRYO DEFECTIVE 2746 (emb2746)	Encodes a member of the metallo-beta-lactamase protein family that plays a vital role in embryo morphogenesis and apical-basal pattern formation by regulating chloroplast development. In bacteria, RNase J plays an important role in rRNA maturation and in the 5′ stability of mRNA.	0.0003367	21.47	20.33	12.98	17.15	27.96	26.73	29.97	44.22
AT2G15080	0.123287	0.518925	4.20906	Up	RECEPTOR LIKE PROTEIN 19 (RLP19)	receptor like protein 19;(source:Araport11)	0.0003446	0.1777	0.09728	0.1472	0.07097	0.2737	0.4525	0.4461	0.9034
AT1G56160	0.6632	0.0929325	0.140127	Down	MYB DOMAIN PROTEIN 72 (MYB72)	Encodes a member of the R2R3 transcription factor gene family that is involved in mediating induced systemic resistance. Genetic analysis of loss of function mutants and overexpressor lines indicates MYB72 is necessary but not sufficient for ISR.Interacts in vivo with EIL3.	0.0003674	0.4822	0.8553	0.7762	0.5391	0.2117	0.1302	0.02983	0
AT5G17270	4.1455	8.1975	1.97745	Up		Protein prenylyltransferase superfamily protein;(source:Araport11)	0.0003676	4.578	4.953	3.032	4.019	6.975	6.607	6.988	12.22
AT2G16505	38.0525	17.77	0.466986	Down	POLLEN COAT PROTEIN B CLASS DELTA (PCP-BDELTA)	Encodes a Maternally expressed gene (MEG) family protein. Expressed in pollen and involved in pollen-stigma interaction.	0.0003718	25.37	43.29	34.01	49.54	23.44	15.69	15.6	16.35
AT3G18600	18.655	31.815	1.70544	Up		P-loop containing nucleoside triphosphate hydrolases superfamily protein;(source:Araport11)	0.0003774	20.1	22.12	13.35	19.05	27.1	31.53	29.54	39.09
AT5G52930	1.2605	3.025	2.39984	Up	DUF295 ORGANELLAR B 4 (ATDOB4)	hypothetical protein (DUF295);(source:Araport11)	0.000379	1.158	1.084	1.005	1.795	2.72	3.224	2.994	3.162
AT3G22010	1.37085	0.236925	0.172831	Down		Receptor-like protein kinase-related family protein;(source:Araport11)	0.000379	0.5574	1.424	1.837	1.665	0.4255	0.2963	0.1811	0.0448
AT3G22510	6.22125	1.61735	0.259972	Down		Pre-rRNA-processing protein TSR2, conserved region;(source:Araport11)	0.000379	6.63	6.465	7.362	4.428	2.967	1.833	0.6484	1.021
AT3G07450	151.3	86.485	0.571613	Down		Bifunctional inhibitor/lipid-transfer protein/seed storage 2S albumin superfamily protein;(source:Araport11)	0.0003812	163.9	132.2	138	171.1	75.78	107.5	80.31	82.35
AT1G63810	12.59	20.775	1.65012	Up		nucleolar protein;(source:Araport11)	0.000398	12.79	14.96	10.08	12.53	19.61	18.46	19.94	25.09
AT3G01020	12.9175	5.5225	0.427521	Down	ISCU-LIKE 2 (ISU2)	Encodes a mitochondrial protein similar to E.coli IscU. In bacteria, IscU is a scaffold protein accepting sulfur and iron to build a transient Fe-S cluster,which is subsequently transferred to a target apoprotein.	0.0004116	11.39	14.14	11.07	15.07	6.241	6.922	5.654	3.273
AT3G12080	26.4825	43.4125	1.63929	Up	EMBRYO DEFECTIVE 2738 (emb2738)	Encodes a putative plastid-targeted GTP-binding protein that is essential for embryogenesis and chloroplast development.	0.0004133	30.17	24.95	25.43	25.38	38.09	39.08	43.62	52.86
AT3G03060	5.5565	10.674	1.92099	Up	SHOT1 BINDING ATPASE 1 (SBA1)	P-loop containing nucleoside triphosphate hydrolases superfamily protein;(source:Araport11)	0.0004193	5.721	6.914	3.641	5.95	9.479	9.056	9.191	14.97
AT5G13700	17.8675	10.3607	0.579866	Down	POLYAMINE OXIDASE 1 (PAO1)	Encodes a protein with polyamine oxidase activity. The mRNA of this gene is only expressed in very low amounts in the organs where it was detected (light-grown plants).	0.0004213	17.64	17.81	17.01	19.01	9.523	11.46	11.73	8.73
AT4G09730	20.16	33.3725	1.65538	Up	RH39 (RH39)	Encodes RH39, a DEAD-box protein involved in the introduction of the hidden break into the 23S rRNA in the chloroplasts. Recombinant RH39 binds to the 23S rRNA in a segment adjacent to the stem-loop creating the hidden break target loop in a sequence-dependent manner. Has ATP-hydrolyzing activity at a Kcat of 5.3 /min in the presence of rRNA sequence. Mutants have drastically reduced level of lev…	0.000423	22.66	20.85	16.52	20.61	30.61	28.23	33.34	41.31
AT3G09630	219.625	353.675	1.61036	Up	SUPPRESSOR OF ACAULIS 56 (SAC56)	Ribosomal protein L4/L1 family;(source:Araport11)	0.0004233	233.8	226.7	192.5	225.5	357.2	339.6	389.5	328.4
AT3G52480	5.4525	10.969	2.01174	Up		transmembrane protein;(source:Araport11)	0.0004339	6.602	4.516	4.38	6.312	8.746	11.43	12.26	11.44
AT1G49405	9.0315	3.19375	0.353623	Down	CASP-LIKE PROTEIN 5C3 (CASPL5C3)	Uncharacterized protein family (UPF0497);(source:Araport11)	0.0004339	8.566	6.833	11.25	9.477	3.542	4.456	2.767	2.01
AT3G25572	13.61	7.6295	0.56058	Down			0.0004339	12.85	14.5	13.52	13.57	8.56	7.219	8.519	6.22
AT5G23510	0.98045	2.61	2.66204	Up		hypothetical protein;(source:Araport11)	0.0004339	1.38	0.9965	0.616	0.9293	2.194	3.298	2.359	2.589
AT5G18020	10.957	3.289	0.300173	Down	SMALL AUXIN UP RNA 20 (SAUR20)	SAUR-like auxin-responsive protein family;(source:Araport11)	0.0004339	8.918	11.68	11.5	11.73	5.727	3.251	2.959	1.219
AT2G16740	31.9375	16.6025	0.519843	Down	UBIQUITIN-CONJUGATING ENZYME 29 (UBC29)	ubiquitin-conjugating enzyme 29;(source:Araport11)	0.0004339	24.78	31.15	38.46	33.36	16.35	20.7	15.6	13.76
AT4G08670	324.725	143.44	0.441728	Down	GLYCOSYLPHOSPHATIDYLINOSITOL-ANCHORED LIPID PROTEIN TRANSFER 4 (LTPG4)	Bifunctional inhibitor/lipid-transfer protein/seed storage 2S albumin superfamily protein;(source:Araport11)	0.0004339	225.8	324.2	457.5	291.4	186.8	133.1	163.9	89.96
AT3G57970	4.0995	1.63925	0.399866	Down		Emsy N Terminus (ENT)/ plant Tudor-like domains-containing protein;(source:Araport11)	0.0004339	4.987	4.13	3.714	3.567	1.569	2.061	1.707	1.22
AT3G53080	20.2925	7.3505	0.362227	Down		D-galactoside/L-rhamnose binding SUEL lectin protein;(source:Araport11)	0.0004339	10.55	21.87	20.53	28.22	10.32	7.829	7.001	4.252
AT5G14380	695.075	212.25	0.305363	Down	ARABINOGALACTAN PROTEIN 6 (AGP6)	Encodes an arabinogalactan protein that is expressed in pollen, pollen sac and pollen tube. Loss of AGP6 function results in decreased fertility due to defects in pollen tube growth.	0.0004339	427.4	484.8	1278	590.1	373.8	186.7	162	126.5
AT5G48543	8.179	1.7976	0.219782	Down	LOW-MOLECULAR-WEIGHT CYSTEINE-RICH 1 (LCR1)	Encodes a member of a family of small,secreted, cysteine rich protein with sequence similarity to the PCP (pollen coat protein) gene family.	0.0004398	6.131	8.744	10.3	7.541	2.496	2.856	1.707	0.1314
AT3G25570	13.3025	7.4705	0.561586	Down	S-ADENOSYLMETHIONINE DECARBOXYLASE 3 (SAMDC3)	S-adenosylmethionine decarboxylase family member.	0.000464	12.56	14.18	13.21	13.26	8.386	7.072	8.347	6.077
AT5G06760	6.9335	2.294	0.330857	Down	LATE EMBRYOGENESIS ABUNDANT 4-5 (LEA4-5)	Encodes LEA4-5, a member of the Late Embryogenesis Abundant (LEA) proteins which typically accumulate in response to low water availability conditions imposed during development or by the environment. Most of the diverse set of LEA proteins can be grouped according to properties such as high hydrophilicity and high content of glycine or other small amino acids in what has been termed hydrophilins…	0.000464	4.867	8.48	6.575	7.812	3.868	2.037	1.986	1.285
AT1G78950	8.2165	3.9635	0.482383	Down	BETA-AMYRIN SYNTHASE (BAS)	Terpenoid cyclases family protein;(source:Araport11)	0.000464	8.752	8.503	8.871	6.74	5.783	3.297	3.255	3.519
AT1G61563	2120.25	655.1	0.308973	Down	RALF-LIKE 8 (RALFL8)	Member of a diversely expressed predicted peptide family showing sequence similarity to tobacco Rapid Alkalinization Factor (RALF), and is believed to play an essential role in the physiology of Arabidopsis. Consists of a single exon and is characterized by a conserved C-terminal motif and N-terminal signal peptide.	0.0004705	1296	1645	3460	2080	1188	593.7	522	316.7
AT5G60730	2.6245	5.285	2.01372	Up	GUIDED ENTRY OF TAIL-ANCHORED PROTEINS 3B (GET3C)	One of 3 GET paralogs in Arabidopsis. GET3c is a mitochondrion localized protein with no obvious role in Tail Anchored (TA) protein insertion.	0.0004737	2.905	2.767	2.545	2.281	4.761	5.124	5.258	5.997
AT4G10450	39.5125	65.1125	1.6479	Up		Ribosomal protein L6 family;(source:Araport11)	0.0004775	42.21	36.89	42.14	36.81	64.05	63.48	71.91	61.01
AT5G67420	13.31	24.525	1.8426	Up	LOB DOMAIN-CONTAINING PROTEIN 37 (LBD37)	Encodes a LOB-domain protein involved in nitrogen metabolism and affecting leaf morphogenesis.	0.0004859	16.28	10.27	13.83	12.86	20.86	21.03	24.45	31.76
ATMG00090	27.2075	74.345	2.73252	Up	RESISTANCE TO PSEUDOMONAS SYRINGAE 3 (RPS3)	ribosomal protein S3	0.0004859	22.65	28.29	31.21	26.68	54.8	41.2	49.58	151.8
AT1G68630	3.40925	1.25883	0.369238	Down		PLAC8 family protein;(source:Araport11)	0.0004955	3.045	3.562	3.758	3.272	1.671	1.509	1.171	0.6843
AT5G40480	30.4225	50.3675	1.6556	Up	EMBRYO DEFECTIVE 3012 (EMB3012)	embryo defective 3012;(source:Araport11)	0.0004965	33.64	36.69	23.7	27.66	47.14	45.16	48.01	61.16
AT5G59370	38.915	15.6573	0.402345	Down	ACTIN 4 (ACT4)	Encodes one of eight Arabidopsis actins. ACT4 belongs to the reproductive actin subclass which is predominantly expressed in developing and reproductive tissues, such as pollen, pollen tubes, ovules, and developing seeds. Expression of the ACT4/GUS fusion was restricted to young vascular tissues, tapetum, and developing and mature pollen.	0.0004989	29.93	40.1	54.09	31.54	24.88	13.43	15.33	8.989
AT1G79150	13.87	26.8875	1.93854	Up	NUCLEOLAR COMPLEX ASSOCIATED 3 (NOC3)	binding protein;(source:Araport11)	0.0004995	14.66	16.56	10.41	13.85	20.64	22.86	22.01	42.04
AT1G01310	8.01125	1.80942	0.225861	Down		CAP (Cysteine-rich secretory proteins, Antigen 5, and Pathogenesis-related 1 protein) superfamily protein;(source:Araport11)	0.0005063	9.616	6.673	9.362	6.394	3.876	2.025	0.8282	0.5085
AT3G29240	16.215	27.575	1.70059	Up		PPR containing protein (DUF179);(source:Araport11)	0.0005066	17.82	16.7	14.03	16.31	22.16	24.53	27.84	35.77
AT3G10930	0.40415	1.599	3.95645	Up	IDA-LIKE7 (IDL7)	Encodes a small secreted signaling peptide that processed both N- and C-terminally after translation and is rapidly induced in response to ROS and flg22-induced stress and may act as a negative modulator of stress-induced ROS signalling.	0.0005354	0.471	0.5764	0.273	0.2962	1.015	1.431	1.224	2.726
AT5G59845	52.155	29.5975	0.567491	Down	GIBBERELLIC ACID STIMULATED ARABIDOPSIS 10 (GASA10)	Member of a family of proteins named as being GA inducible but GASA10 does not appear to be GA induced. It is likely to be secreted as the protein is found in the cell wall.	0.0005423	48.78	49.57	58.91	51.36	25.63	34.2	32.7	25.86
AT5G07430	218.275	64.66	0.296232	Down		Pectin lyase-like superfamily protein;(source:Araport11)	0.0005774	136.7	205.7	345.5	185.2	131.2	52.97	44.91	29.56
AT1G23670	39.6725	22.95	0.578486	Down		OBP32pep protein, putative (DUF220);(source:Araport11)	0.0005804	34.95	43.06	42.03	38.65	24.36	21.98	25.57	19.89
ATCG00270	34.3375	82.185	2.39345	Up	PHOTOSYSTEM II REACTION CENTER PROTEIN D (PSBD)	PSII D2 protein	0.0005804	30.62	43.97	32.24	30.52	70.81	45.04	61.79	151.1
AT5G66870	5.71325	3.02075	0.528727	Down	ASYMMETRIC LEAVES 2-LIKE 1 (ASL1)	Encodes LOB domain protein whose overexpression results in KNOX gene repression. Overexpression also results in plants with hyponastic leaves, downward pointing flowers and reduced apical dominance. May be involved in the transcriptional regulation of the homeobox gene BP (brevipedicellus) during lateral organ differentiation. Acts together with AS2 in proximal-distal symmetry determination.	0.0005804	6.094	5.93	5.263	5.566	2.753	3.161	3.067	3.102
AT5G62240	13.4575	5.6	0.416125	Down	(TPXL8)	TPX2-LIKE Group A family with aurora binding andTPX2 domains. Activator of Aurora kinase activity.	0.0005817	12.34	12.09	17.91	11.49	9.02	5.396	4.036	3.948
AT5G53820	371.2	192.775	0.519329	Down		Late embryogenesis abundant protein (LEA) family protein;(source:Araport11)	0.0005817	301.8	442.7	360.5	379.8	261.4	194.9	181.7	133.1
ATCG01060	41.2425	100.435	2.43523	Up	(PSAC)	Encodes the PsaC subunit of photosystem I.	0.0005817	36.28	49.13	53.04	26.52	91.07	64.2	81.57	164.9
AT1G43145	3.4355	0.946125	0.275397	Down		hypothetical protein;(source:Araport11)	0.0005823	1.741	3.31	4.842	3.849	1.26	0.5954	0.5361	1.393
AT3G53460	242.025	383.3	1.58372	Up	CHLOROPLAST RNA-BINDING PROTEIN 29 (CP29)	Encodes a nuclear gene with a consensus RNA-binding domain that is localized to the chloroplast.	0.0005823	251.6	243.8	230.4	242.3	366.9	370.3	397.8	398.2
AT5G13630	53.765	93.0775	1.73119	Up	GENOMES UNCOUPLED 5 (GUN5)	Encodes magnesium chelatase involved in plastid-to-nucleus signal transduction.	0.0005823	61.22	60.33	41.39	52.12	82.45	74.46	90.8	124.6
AT3G56880	58.295	98.35	1.68711	Up		VQ motif-containing protein;(source:Araport11)	0.0005823	50.98	54.72	60.32	67.16	77.19	110.9	96.81	108.5
AT1G65480	14.0768	4.4595	0.316799	Down	FLOWERING LOCUS T (FT)	FT, together with LFY, promotes flowering and is antagonistic with its homologous gene, TERMINAL FLOWER1 (TFL1). Together with TSF, it plays an antagonistic role to TFL1 in the determination of inflorescence meristem identity. FT is expressed in leaves and is induced by long day treatment. Either the FT mRNA or protein is translocated to the shoot apex where it induces its own expression. Recent …	0.000588	6.857	15.72	20.82	12.91	7.489	3.804	4.013	2.532
AT4G37990	2.814	0.889125	0.315965	Down	ELICITOR-ACTIVATED GENE 3-2 (ELI3-2)	Encodes an aromatic alcohol:NADP+ oxidoreductase whose mRNA levels are increased in response to treatment with a variety of phytopathogenic bacteria. Though similar to mannitol dehydrogenases, this enzyme does not have mannitol dehydrogenase activity.	0.0005971	2.196	3.015	3.829	2.216	1.159	1.299	0.5987	0.4998
ATCG00350	123.01	292.075	2.3744	Up	(PSAA)	Encodes psaA protein comprising the reaction center for photosystem I along with psaB protein; hydrophobic protein encoded by the chloroplast genome.	0.0005971	101.8	143.4	162.6	84.24	275	179.5	245.8	468
AT5G61590	10.7	22.4625	2.0993	Up	DECREASE WAX BIOSYNTHESIS (DEWAX)	Encodes an AP2/ERF-type transcription factor that is preferentially expressed in the epidermis and induced by darkness and negatively regulates cuticular wax biosynthesis.	0.0005983	14.79	9.574	7.716	10.72	17.01	17.73	20.67	34.44
AT4G04450	28.7725	15.12	0.525502	Down	(WRKY42)	member of WRKY Transcription Factor; Group II-b. Interacts with lncRNA APOLO to trigger root hair cell expansion in response to cold.	0.0005983	23.67	32.58	33.52	25.32	17.49	11.07	16.81	15.11
AT5G20250	18.1472	47.67	2.62684	Up	DARK INDUCIBLE 10 (DIN10)	encodes a member of glycosyl hydrolase family 36. Expression is induced within 3 hours of dark treatment, in senescing leaves and treatment with exogenous photosynthesis inhibitor. Induction of gene expression was suppressed in excised leaves supplied with sugar. The authors suggest that the gene's expression pattern is responding to the level of sugar in the cell. The mRNA is cell-to-cell mobile.	0.0005983	33.44	16.67	13	9.479	25.59	45.55	53.37	66.17
AT2G19770	54.0525	25.7875	0.477082	Down	PROFILIN 5 (PRF5)	Encodes profilin 5, originally named profilin 4 (PRO4/PFN4). Low-molecular weight, actin monomer-binding protein that regulates the organization of actin cytoskeleton. Pollen-specific plant profilin present predominantly in mature pollen and growing pollen tubes.	0.0005983	40.63	61.53	65.57	48.48	35.11	21.78	28	18.26
AT3G56990	9.56325	15.9725	1.6702	Up	EMBRYO SAC DEVELOPMENT ARREST 7 (EDA7)	embryo sac development arrest 7;(source:Araport11)	0.0005983	8.884	10.32	9.236	9.813	13.97	14.64	15.35	19.93
ATCG00140	17.46	52.0225	2.97952	Up	(ATPH)	ATPase III subunit	0.0005988	16.88	22.85	16.19	13.92	38.44	29.17	32.98	107.5
AT3G58610	120.75	202.025	1.67308	Up		ketol-acid reductoisomerase;(source:Araport11)	0.0005988	133	128.3	96.3	125.4	181.6	176	185.9	264.6
AT1G13160	9.98975	16.8725	1.68898	Up		ARM repeat superfamily protein;(source:Araport11)	0.0006033	10.46	12.23	7.778	9.491	16.41	14.11	16.3	20.67
ATCG00340	151.925	372.525	2.45203	Up	(PSAB)	Encodes the D1 subunit of photosystem I reaction center.	0.0006067	128.6	180.1	180.5	118.5	310.1	224.1	280.8	675.1
AT1G15415	201.4	80.7125	0.400757	Down		The protein encoded by this gene was identified as a part of pollen proteome by mass spec analysis. It has weak homology to LEA (late embryo abundant) proteins. Encodes protein phosphatase 2A (PP2A) B'gamma subunit. Targeted to nucleus and cytosol.	0.0006067	136.7	221.1	226.9	220.9	131.3	86.06	64.83	40.66
AT2G24120	21.955	37.035	1.68686	Up	SCABRA 3 (SCA3)	DNA/RNA polymerases superfamily protein;(source:Araport11)	0.0006253	25.9	24.83	18.71	18.38	33.67	30.61	35.46	48.4
AT4G17250	0.178725	0.70325	3.93482	Up		transmembrane protein;(source:Araport11)	0.0006268	0.226	0.1899	0.0896	0.2094	0.3418	0.4914	0.7108	1.269
AT5G16930	10.3945	17.8225	1.71461	Up	SHOT1 BINDING ATPASE 2 (SBA2)	AAA-type ATPase family protein;(source:Araport11)	0.0006278	11	10.72	8.718	11.14	15.72	15.51	15.9	24.16
AT4G22080	50.095	24.04	0.479888	Down	ROOT HAIR SPECIFIC 14 (RHS14)	root hair specific 14;(source:Araport11)	0.0006326	72.43	33.25	54.87	39.83	17.61	28.55	27.2	22.8
AT1G73220	17.525	9.29625	0.530456	Down	ORGANIC CATION/CARNITINE TRANSPORTER1 (OCT1)	Encodes Organic Cation Transporter 1 (OCT1), likely to be involved in polyamine transport.	0.0006348	18.02	20.73	16.75	14.6	11.36	8.094	10.92	6.811
AT5G23960	2.08377	0.216027	0.103671	Down	TERPENE SYNTHASE 21 (TPS21)	Encodes a sesquiterpene synthase involved in generating all of the group A sesquiterpenes found in the Arabidopsis floral volatile blend. Strongly expressed in the stigma.	0.0006399	2.261	1.224	4.593	0.2571	0.4516	0.2794	0.07397	0.05914
AT5G09220	23.4425	14.1475	0.603498	Down	AMINO ACID PERMEASE 2 (AAP2)	member of AAAP family The mRNA is cell-to-cell mobile.	0.0006399	22.93	26.49	21.1	23.25	12.94	15.23	15.36	13.06
AT5G50800	19.1675	6.2265	0.324847	Down	(SWEET13)	Encodes a member of the SWEET sucrose efflux transporter family proteins, together with RPG1, it is involved in pollen development. Together with SWEET14, it is likely involved in modulating the GA response and is required for proper development of anthers, seeds and seedlings.	0.0006463	16.65	11.47	35.24	13.31	9.357	6.357	5.842	3.35
AT5G15600	9.1225	3.4205	0.374952	Down	SPIRAL1-LIKE4 (SP1L4)	SPIRAL1-LIKE4 belongs to a six-member gene family in Arabidopsis; all members share high sequence similarity in amino- and carboxy-terminal regions. Regulates cortical microtubule organization. Mutant plants exhibit altered patterns of root, leaf and petal growth as a result of defective anisotropic cell expansion.	0.0006631	9.807	6.884	13.37	6.429	3.244	4.776	2.759	2.903
ATCG00800	17.1825	58.8225	3.4234	Up	RESISTANCE TO PSEUDOMONAS SYRINGAE 3 (RPS3)	encodes a chloroplast ribosomal protein S3, a constituent of the small subunit of the ribosomal complex	0.0006709	16.99	22.02	16.55	13.17	36.09	28.22	30.68	140.3
AT4G02810	4.925	1.821	0.369746	Down	FANTASTIC FOUR 1 (FAF1)	A member of the FAF family proteins encoded by the FANTASTIC FOUR (FAF) genes: AT4G02810 (FAF1), AT1G03170 (FAF2), AT5G19260 (FAF3) and AT3G06020 (FAF4). FAFs have the potential to regulate shoot meristem size in Arabidopsis thaliana. FAFs can repress WUS, which ultimately leads to an arrest of meristem activity in FAF overexpressing lines.	0.0006828	3.876	4.329	3.518	7.977	1.888	1.916	1.385	2.095
ATCG00750	11.3955	49.355	4.3311	Up	RIBOSOMAL PROTEIN S11 (RPS11)	30S chloroplast ribosomal protein S11	0.0006828	10.16	14.49	11.5	9.432	26.24	19.14	21.74	130.3
AT4G35180	10.3727	3.483	0.335784	Down	LYS/HIS TRANSPORTER 7 (LHT7)	LYS/HIS transporter 7;(source:Araport11)	0.0006909	10.42	8.654	14.85	7.567	6.297	3.59	2.271	1.774
AT3G28980	214.1	96.2475	0.449545	Down		mediator of RNA polymerase II transcription subunit-like protein, putative (DUF1216);(source:Araport11)	0.0006909	159	221.1	283.4	192.9	151.8	76.64	82.99	73.56
ATCG01050	21.78	53.1225	2.43905	Up	(NDHD)	Represents a plastid-encoded subunit of a NAD(P)H dehydrogenase complex. Its mRNA is edited at four positions. Translation data is not available for this gene.	0.0007057	20.23	25.25	27.04	14.6	42.75	33.37	41.33	95.04
AT4G15770	70.1975	111.75	1.59194	Up		RNA binding protein;(source:Araport11)	0.0007108	67.62	68.23	76.06	68.88	108.1	111.3	121.8	105.8
AT1G29140	343.85	114.77	0.333779	Down		Pollen Ole e 1 allergen and extensin family protein;(source:Araport11)	0.0007119	207.4	323.4	551.8	292.8	206.1	100.4	96.83	55.75
AT3G58660	24.04	39.235	1.63207	Up		Ribosomal protein L1p/L10e family;(source:Araport11)	0.0007289	22.6	26.09	26.16	21.31	38.91	36.05	41.8	40.18
AT4G12530	2.55723	0.0277	0.010832	Down	(AZI7)	Encodes a member of the AZI family of lipid transfer proteins.	0.0007292	0.9248	0.03281	9.142	0.1293	0.1108	0	0	0
AT2G20700	40.54	17.87	0.440799	Down	LORELEI-LIKE-GPI ANCHORED PROTEIN 2 (LLG2)	LLG2/3 are involved in regulation of pollen tube growth by trafficking of ANX/BUPS to the apical PM of pollen tubes. In the PM they function as co-receptors with ANX/BUPS to regulate ROS production.	0.0007331	32.56	30.88	59.38	39.34	24.79	18.15	16.16	12.38
AT3G19030	0.112552	1.52127	13.5161	Up		transcription initiation factor TFIID subunit 1b-like protein;(source:Araport11)	0.0007372	0.3712	0.07901	0	0	0.7112	0.9773	0.8956	3.501
AT5G19820	25.1275	39.665	1.57855	Up	(KARYOPHERIN ENABLING THE TRANSPORT OF THE CYTOPLASMIC HYL1 (KETCH1)	Encodes an importin that transports HYL1, a component of the microprocessor, from the cytoplasm to the nucleus to constitute functional microprocessor, thereby affecting miRNA processing. Knockdown amiR mutants significantly reduced nuclear portion of HYL1 protein and correspondingly compromised the pri-miRNA processing in the nucleus.KETCH1 may protect RPs from the 26S proteasome-mediated degrad…	0.0007441	25.73	26.7	23.93	24.15	38.69	33.38	39.27	47.32
AT1G29320	8.58775	15.33	1.7851	Up		Transducin/WD40 repeat-like superfamily protein;(source:Araport11)	0.0007445	9.408	9.583	6.045	9.315	13.12	14.28	13.16	20.76
AT3G08560	119.318	52.9975	0.444172	Down	VACUOLAR H+-ATPASE SUBUNIT E ISOFORM 2 (VHA-E2)	vacuolar H+-ATPase subunit E isoform 2;(source:Araport11)	0.0007453	72.47	121.5	180.5	102.8	68.86	44.47	56.51	42.15
ATCG00810	14.4525	45.745	3.1652	Up	RIBOSOMAL PROTEIN L22 (RPL22)	encodes a chloroplast ribosomal protein L22, a constituent of the large subunit of the ribosomal complex	0.0007453	15.42	17.47	14.14	10.78	28.98	24.78	26.02	103.2
AT2G19030	8.88475	1.37505	0.154765	Down	RALF-LIKE 11 (RALFL11)	Member of a diversely expressed predicted peptide family showing sequence similarity to tobacco Rapid Alkalinization Factor (RALF), and is believed to play an essential role in the physiology of Arabidopsis. Consists of a single exon and is characterized by a conserved C-terminal motif and N-terminal signal peptide.	0.000756	12.79	9.011	7.082	6.656	3.44	1.225	0.1871	0.6481
AT4G02140	184.775	82.43	0.44611	Down		hypothetical protein;(source:Araport11)	0.0007723	106.2	172.4	273.3	187.2	104.2	82	84.63	58.89
AT3G21970	49.71	17.4575	0.351187	Down		cysteine-rich repeat secretory protein, putative (DUF26);(source:Araport11)	0.0007723	27.06	51.61	63.77	56.4	31.66	14.35	14.6	9.22
AT5G48375	2.361	0.5615	0.237823	Down	THIOGLUCOSIDE GLUCOSIDASE 3 (TGG3)	Is a myrosinase pseudogene that codes for a truncated and frameshifted protein. Although TGG3 apparently is a pseudogene, its mRNA is expressed specifically in stamen and petal according to RT-PCR analysis. Western analysis shows no band of the size expected for a TGG3 protein.	0.0007795	1.306	2.643	2.726	2.769	1.202	0.4064	0.3957	0.2419
ATCG00040	8.49175	19.1525	2.25542	Up	MATURASE K (MATK)	Encodes a maturase located in the trnK intron in the chloroplast genome.	0.0007795	9.273	9.144	8.623	6.927	14.53	13.07	14.33	34.68
AT3G21930	2.18825	0.5896	0.269439	Down		cysteine-rich repeat secretory protein;(source:Araport11)	0.0008026	1.085	1.951	2.284	3.433	0.8562	0.4084	0.4651	0.6287
AT3G03710	5.90275	10.9855	1.86108	Up	RESISTANT TO INHIBITION WITH FSM 10 (RIF10)	Encodes a chloroplast polynucleotide phosphorylase (PNPase). Involved in response to phosphorus (P) starvation. Mutants impaired in the expression of this gene have been selected through their resistance to fosmidomycin, a strong inhibitor of DXR, an enzyme of the methylerythritol-dependent IPP biosynthesis pathway. The pathway enzymes were upregulated in the mutant seedlings.	0.0008041	7.24	6.428	4.539	5.404	9.26	8.382	10.05	16.25
AT4G24280	68.1625	113.137	1.65982	Up	CHLOROPLAST HEAT SHOCK PROTEIN 70-1 (cpHsc70-1)	Involved in protein import into chloroplasts during early developmental stages. The mRNA is cell-to-cell mobile.	0.000814	77.86	77.34	47.2	70.25	99.25	101.2	111.5	140.6
AT1G79450	6.41475	3.30425	0.515102	Down	ALA-INTERACTING SUBUNIT 5 (ALIS5)	ALA-interacting subunit 5;(source:Araport11)	0.0008285	6.162	6.919	6.13	6.448	3.82	3.442	3.093	2.862
AT4G12750	5.39275	9.65175	1.78976	Up		Homeodomain-like transcriptional regulator;(source:Araport11)	0.0008296	6.24	6.772	3.825	4.734	8.504	8.331	8.722	13.05
AT2G38905	127.207	55.0025	0.432384	Down		Low temperature and salt responsive protein family;(source:Araport11)	0.000841	92.23	124.6	167.3	124.7	74.01	55.99	62.3	27.71
AT1G25400	0.182337	0.8122	4.45438	Up		transmembrane protein;(source:Araport11)	0.0008808	0.2737	0.1538	0.2284	0.07345	0.4091	0.8781	0.6666	1.295
AT5G19240	1.50025	5.557	3.70405	Up		Glycoprotein membrane precursor GPI-anchored;(source:Araport11)	0.0009254	1.577	1.76	1.387	1.277	2.475	10.35	2.409	6.994
AT1G26820	24.78	12.631	0.509726	Down	RIBONUCLEASE 3 (RNS3)	Encodes ribonuclease RNS3.	0.0009321	17.24	29.99	27.37	24.52	15.71	13.54	11.55	9.724
ATCG00690	31.8325	80.465	2.52776	Up	PHOTOSYSTEM II REACTION CENTER PROTEIN T (PSBT)	Encodes photosystem II 5 kD protein subunit PSII-T. This is a plastid-encoded gene (PsbTc) which also has a nuclear-encoded paralog (PsbTn).	0.000934	29.48	37.48	41.54	18.83	76.97	58.51	68.08	118.3
AT5G52160	90.0575	54.3675	0.603698	Down		Bifunctional inhibitor/lipid-transfer protein/seed storage 2S albumin superfamily protein;(source:Araport11)	0.0009531	96.86	74.6	91.07	97.7	51.37	57.87	56.94	51.29
ATCG00680	62.11	164.455	2.6478	Up	PHOTOSYSTEM II REACTION CENTER PROTEIN B (PSBB)	encodes for CP47, subunit of the photosystem II reaction center.	0.0009611	51.6	71.05	70.74	55.05	130	83.12	112.1	332.6
AT4G13750	3.69075	6.5145	1.76509	Up	NO VEIN (NOV)	Encodes NO VEIN (NOV), a plant-specific nuclear factor required for leaf vascular development, cellular patterning and stem cell maintenance in the root meristem, as well as for cotyledon outgrowth and separation. nov mutations affect many aspects of auxin-dependent development without directly affecting auxin perception.	0.0009937	3.609	4.56	3.111	3.483	5.522	5.531	5.71	9.295
AT4G34750	9.428	4.48025	0.475207	Down	SMALL AUXIN UPREGULATED RNA 49 (SAUR49)	SAUR-like auxin-responsive protein family;(source:Araport11)	0.001008	9.41	8.926	9.266	10.11	6.061	3.849	4.251	3.76
AT2G28405	45.565	14.549	0.319302	Down	LOW-MOLECULAR-WEIGHT CYSTEINE-RICH 32 (LCR32)	Encodes a member of a family of small,secreted, cysteine rich protein with sequence similarity to the PCP (pollen coat protein) gene family.	0.001012	25.35	49.15	45.88	61.88	25.8	15.57	10.49	6.336
AT3G11825	33.185	11.9778	0.360939	Down		Encodes a Protease inhibitor/seed storage/LTP family protein	0.001016	17.03	36.4	34.94	44.37	19.3	10.84	8.519	9.252
AT5G46580	10.269	16.6425	1.62065	Up	SUPPRESSOR OF THYLAKOID FORMATION 1 (SOT1)	pentatricopeptide (PPR) repeat-containing protein;(source:Araport11)	0.001016	12.36	11.58	7.734	9.402	15.96	15.99	16.15	18.47
ATCG00820	37.015	162.545	4.39133	Up	RIBOSOMAL PROTEIN S19 (RPS19)	Encodes a 6.8-kDa protein of the small ribosomal subunit.	0.001016	31.1	44.08	31.58	41.3	77.31	55.04	70.63	447.2
AT2G01275	6.31675	2.1675	0.343135	Down		RING/FYVE/PHD zinc finger superfamily protein;(source:Araport11)	0.001016	6.513	5.286	9.041	4.427	3.279	2.611	1.586	1.194
AT2G33775	68.055	18.2247	0.267794	Down	RALF-LIKE 19 (RALFL19)	Member of a diversely expressed predicted peptide family showing sequence similarity to tobacco Rapid Alkalinization Factor (RALF), and is believed to play an essential role in the physiology of Arabidopsis. Consists of a single exon and is characterized by a conserved C-terminal motif and N-terminal signal peptide.	0.001025	70.39	58.53	92.55	50.75	37.72	20.68	9.36	5.139
AT1G65390	0.124892	0.8083	6.47197	Up	PHLOEM PROTEIN 2 A5 (PP2-A5)	Phloem Protein2 family gene encoding a two-domain protein containing predicted lectin and Toll/Interleukin-1 receptor domains, which is induced upon spider mite attack and improves the ability to defend against T. urticae by participating in the tight regulation of hormonal cross talk upon mite feeding.	0.001025	0.1208	0.1672	0.09337	0.1182	0.2605	0.9055	0.2542	1.813
AT5G07010	8.5325	4.45625	0.522268	Down	SULFOTRANSFERASE 2A (ST2A)	Encodes a sulfotransferase that acts specifically on 11- and 12-hydroxyjasmonic acid. Transcript levels for this enzyme are increased by treatments with jasmonic acid (JA), 12-hydroxyJA, JA-isoleucine, and 12-oxyphytodienoic acid (a JA precursor).	0.001025	9.879	9.068	7.805	7.378	4.617	5.534	4.076	3.598
ATCG00720	21.4875	51.46	2.39488	Up	PHOTOSYNTHETIC ELECTRON TRANSFER B (PETB)	Encodes the cytochrome b(6) subunit of the cytochrome b6f complex.	0.001025	19.16	28.71	22.23	15.85	41.67	30.99	38.61	94.57
AT5G28888	1.44603	0.295465	0.204329	Down		pseudogene similar to terpenoid cyclase/protein prenyltransferase alpha-alpha toroid	0.001033	1.575	1.199	2.299	0.7111	0.3264	0.5153	0.06746	0.2727
AT5G61430	49.2775	27.0375	0.548678	Down	NAC DOMAIN CONTAINING PROTEIN 100 (NAC100)	NAC domain containing protein 100;(source:Araport11)	0.001041	36.41	55.6	58.96	46.14	32.04	26.3	26	23.81
AT3G48560	88.135	137.075	1.55528	Up	CHLORSULFURON/IMIDAZOLINONE RESISTANT 1 (CSR1)	Catalyzes the formation of acetolactate from pyruvate, the first step in valine and isoleucine biosynthesis. Requires FAD, thiamine pyrophosphate and Mg. Inhibited by the sulphonylurea herbicide, chlorsulphuron, and the imidazolinone herbicide, imazapyr. The obtained crystal structure of acetohydroxyacid synthase AHAS, EC 2.2.1.6)in complex with herbicides of the sulphonylurea and imidazolinone f…	0.001044	85.78	95.95	81.09	89.72	129.1	122.1	144.3	152.8
AT3G21660	2.709	1.0699	0.394943	Down		UBX domain-containing protein;(source:Araport11)	0.001054	3.17	2.017	3.088	2.561	1.18	1.075	1.212	0.8126
AT4G02520	0.38795	3.79775	9.78928	Up	GLUTATHIONE S-TRANSFERASE PHI 2 (GSTF2)	Encodes glutathione transferase belonging to the phi class of GSTs. Naming convention according to Wagner et al. (2002). The expression of this gene is upregulated by herbicide safeners such as benoxacor and fenclorim.	0.001071	0.2511	0.2494	0.8407	0.2106	1.002	11.59	1.056	1.543
ATCG01010	4.5775	10.545	2.30366	Up	(NDHF)	Chloroplast encoded NADH dehydrogenase unit.	0.001071	4.182	4.657	5.825	3.646	8.904	6.676	8.4	18.2
AT1G48590	15.67	5.98375	0.38186	Down	C2-DOMAIN ABA-RELATED 5 (CAR5)	Calcium-dependent lipid-binding (CaLB domain) family protein;(source:Araport11)	0.001072	11.21	15.15	20.08	16.24	10.29	5.387	4.7	3.558
AT4G32770	29.955	17.735	0.592055	Down	VITAMIN E DEFICIENT 1 (VTE1)	Tocopherol cyclase involved in tocopherol (vitamin E)synthesis. VTE1 over-expressing plants have increased tocopherol indicating VTE1 is a major limiting factor in tocopherol synthesis. Mutants defective in this gene accumulate high amounts of zeaxanthin in conditions of high light or low temperature. Plays a role in the adaptation to low temperature stress, notably phloem loading.	0.001074	31.35	29.68	21.8	36.99	16.33	17.83	19.14	17.64
AT1G24090	3.87	7.237	1.87003	Up	(RNH1C)	RNase H family protein;(source:Araport11)	0.001081	4.787	4.129	3.473	3.091	6.554	7.582	7.583	7.229
AT2G01422	21.2675	11.2248	0.527789	Down		other_RNA;(source:Araport11)	0.001083	17.76	20.86	19.31	27.14	12.36	11.56	11.52	9.459
AT1G07860	20.045	10.026	0.500175	Down		Serine/Threonine-kinase RLCKVII protein;(source:Araport11)	0.001084	20.77	19.35	21.93	18.13	10.93	10.23	10.78	8.164
AT1G12770	11.443	19.6675	1.71874	Up	EMBRYO DEFECTIVE 1586 (EMB1586)	Encodes a DEAD-box RNA helicase that localizes to mitochondria and is essential for regulating cell-to-cell transport via plasmodesmata. The mRNA is cell-to-cell mobile.	0.001131	12.1	12.15	9.532	11.99	16.83	16.39	17.82	27.63
AT2G04030	30.875	61.3125	1.98583	Up	(CR88)	Encodes a chloroplast-targeted 90-kDa heat shock protein located in the stroma involved in red-light mediated deetiolation response and crucial for protein import into the chloroplast stroma. Mutants are resistant to chlorate, have elongated hypocotyls in light, and affect the expression of NR2, CAB, and RBCS but NOT NR1 and NiR.	0.001138	37.01	37.51	18.9	30.08	43.08	51.24	52.91	98.02
ATCG00540	26.85	73.0825	2.72188	Up	PHOTOSYNTHETIC ELECTRON TRANSFER A (PETA)	Encodes cytochrome f apoprotein; involved in photosynthetic electron transport chain; encoded by the chloroplast genome and is transcriptionally repressed by a nuclear gene HCF2.	0.001147	24.84	32.55	25.82	24.19	50.79	39.45	45.19	156.9
AT5G26742	69.4075	109.95	1.58412	Up	EMBRYO DEFECTIVE 1138 (emb1138)	DEAD box RNA helicase (RH3);(source:Araport11)	0.001154	76.35	75.54	68.05	57.69	112.4	97.5	109.8	120.1
AT3G52670	2.70175	5.5615	2.05848	Up		FBD;(source:Araport11)	0.001196	3.354	3.144	2.095	2.214	4.7	5.376	5.501	6.669
AT5G62080	519.875	285.275	0.548738	Down		Bifunctional inhibitor/lipid-transfer protein/seed storage 2S albumin superfamily protein;(source:Araport11)	0.001196	570	433	514.6	561.9	282.1	363.7	304.1	191.2
AT3G01700	275.975	68.055	0.246598	Down	ARABINOGALACTAN PROTEIN 11 (AGP11)	Encodes an arabinogalactan protein that is expressed in pollen, pollen sac and pollen tube. Loss of AGP11 function results in decreased fertility due to defects in pollen tube growth.	0.001196	165.5	158.4	590.6	189.4	142.3	55.75	38.92	35.25
AT3G07830	21.79	4.9055	0.225126	Down	POLYGALACTURONASE 3 (PGA3)	Pectin lyase-like superfamily protein;(source:Araport11)	0.001196	18.31	20.82	31.17	16.86	10.18	6.545	1.852	1.045
AT5G05500	1.1413	0.332575	0.2914	Down	(MOP10)	Encodes Proline-rich protein-like PRPL1, controls elongation of root hairs.	0.001197	1.039	1.255	0.8762	1.395	0.3802	0.4134	0.1964	0.3403
AT1G23280	29.05	47.12	1.62203	Up		MAK16 protein-like protein;(source:Araport11)	0.001206	28.52	30.77	31.84	25.07	41.69	46.81	47.62	52.36
AT3G02550	33.4125	53.725	1.60793	Up	LOB DOMAIN-CONTAINING PROTEIN 41 (LBD41)	LOB domain-containing protein 41;(source:Araport11)	0.001206	38.43	30.83	25.91	38.48	44.22	54.79	61.07	54.82
AT1G49540	3.5145	5.9165	1.68345	Up	ELONGATOR PROTEIN 2 (ELP2)	elongator protein 2;(source:Araport11)	0.001207	3.891	3.828	2.669	3.67	5.47	5.464	6.171	6.561
AT4G14815	181.65	101.442	0.55845	Down	GLYCOSYLPHOSPHATIDYLINOSITOL-ANCHORED LIPID PROTEIN TRANSFER 26 (LTPG26)	Bifunctional inhibitor/lipid-transfer protein/seed storage 2S albumin superfamily protein;(source:Araport11)	0.001226	189.6	164.6	186.5	185.9	89.99	128.9	118.4	68.48
AT2G47880	99.52	40.4725	0.406677	Down	CEP DOWNSTREAM 2 (CEPD2)	Encodes a member of the CC-type glutaredoxin (ROXY) family. CEPD2 is a non secreted polypeptide that is highly similar to CEPD1 which is another member of a novel family related to glutaredoxins. It is induced by nitrogen starvation. It acts downstream of the CEP1 peptide in systemic N-demand signalling .The RNA is expressed in the phloem of cotelydon and leaf vasculature but the peptide is graft…	0.001235	56.01	72.07	164.6	105.4	52.64	41.49	39.07	28.69
AT5G10140	7.228	3.4725	0.480423	Down	FLOWERING LOCUS C (FLC)	MADS-box protein encoded by FLOWERING LOCUS C - transcription factor that functions as a repressor of floral transition and contributes to temperature compensation of the circadian clock. Expression is downregulated during cold treatment. Vernalization, FRI and the autonomous pathway all influence the state of FLC chromatin. Both maternal and paternal alleles are reset by vernalization, but their…	0.00126	7.862	7.281	8.222	5.547	3.252	3.244	3.737	3.657
AT3G56240	36.32	21.91	0.603249	Down	COPPER CHAPERONE (CCH)	CCH protein belongs to a family of eukaryotic proteins that participate in intracellular copper homeostasis by delivering this metal to the secretory pathway; mainly located along the vascular bundles of senescing leaves and petioles as well as in stem sieve elements; hypothesized to have a role in copper mobilization from decaying organs towards reproductive structures, as a result of metallopro…	0.001265	34.85	34.82	34.25	41.36	22.95	23.63	20.6	20.46
AT3G55510	10.652	16.705	1.56825	Up	REBELOTE (RBL)	Encodes a regulator of floral determinacy in that interacts with both nucleolar and nucleoplasmic proteins.	0.001265	10.9	12.33	8.648	10.73	15.66	16.96	15.73	18.47
AT5G02870	289.35	475.6	1.64368	Up	RIBOSOMAL LARGE SUBUNIT 4 (RPL4)	Ribosomal protein L4/L1 family;(source:Araport11)	0.001281	298.6	315.3	222.3	321.2	411.3	436	452.4	602.7
AT4G09430	4.7745	2.46875	0.51707	Down		disease resistance protein (TIR-NBS-LRR class);(source:Araport11)	0.001302	4.656	4.687	5.632	4.123	2.421	2.128	3.211	2.115
AT1G23600	32.02	17.35	0.541849	Down		OBP32pep protein, putative (Domain of unknown function DUF220);(source:Araport11)	0.001302	23.45	35.75	38.71	30.17	20.16	15.63	18.58	15.03
AT5G04130	15.79	26.565	1.68239	Up	DNA GYRASE B2 (GYRB2)	Encodes a protein that when expressed together with GYRA generates an active supercoiling DNA gyrase enzyme that shares similar properties to its bacterial counterpart, including sensitivity to gyrase-specific antibiotics.	0.001308	18.16	18.25	10.79	15.96	22.41	25.24	24.35	34.26
AT5G65070	4.47675	1.93775	0.432847	Down	MADS AFFECTING FLOWERING 4 (MAF4)	Encodes MADS-box containing FLC paralog. Five splice variants have been identified but not characterized with respect to expression patterns and/or differing function. Overexpression of the gene in the Landsberg ecotype leads to a delay in flowering, transcript levels of MAF4 are reduced after a 6 week vernalization.	0.001322	5.245	3.959	4.785	3.918	1.9	1.535	1.822	2.494
AT5G23010	5.3585	12.625	2.35607	Up	METHYLTHIOALKYLMALATE SYNTHASE 1 (MAM1)	Encodes a methylthioalkylmalate synthase, catalyzes the condensation reactions of the first two rounds of methionine chain elongation in the biosynthesis of methionine-derived glucosinolates. The mRNA is cell-to-cell mobile.	0.001327	2.663	4.165	6.341	8.265	15.52	11.28	10.82	12.88
AT5G62850	155.63	54.215	0.348358	Down	VEGETATIVE CELL EXPRESSED1 (AtVEX1)	Encodes a protein that is expressed in vegetative cells of pollen. A member of the SWEET sucrose efflux transporter family proteins.	0.001339	75.02	157.3	243.8	146.4	98.88	41.46	43.4	33.12
AT2G38250	0.0949275	0.645225	6.79703	Up		Homeodomain-like superfamily protein;(source:Araport11)	0.001343	0.06152	0.09821	0.1426	0.07738	0.3094	0.6354	0.3311	1.305
AT4G23540	13.375	20.9675	1.56766	Up		ARM repeat superfamily protein;(source:Araport11)	0.001349	13.78	14.77	11.85	13.1	18.29	21.26	18.53	25.79
AT2G16592	5.1925	1.47523	0.284107	Down		Encodes a Protease inhibitor/seed storage/LTP family protein	0.001349	2.855	5.841	7.497	4.577	2.142	1.965	1.144	0.6499
AT5G08620	15.705	24.475	1.55842	Up	STRESS RESPONSE SUPPRESSOR 2 (STRS2)	Similar in sequence to DEAD-box RNA helicases. Binds RNA. Involved in drought, salt and cold stress responses.	0.001351	17.76	17.77	12.28	15.01	23.8	25.69	25.05	23.36
AT1G33770	5.25625	2.7555	0.524233	Down		Protein kinase superfamily protein;(source:Araport11)	0.001365	5.173	5.257	5.075	5.52	3.351	2.624	2.444	2.603
AT3G57940	9.2255	15.195	1.64707	Up		GNAT acetyltransferase (DUF699);(source:Araport11)	0.001371	10.4	11.48	6.189	8.833	14.32	14.53	14.34	17.59
AT1G65113	22.9675	8.22425	0.358082	Down	SCR-LIKE 2 (SCRL2)	Encodes a member of a family of small, secreted, cysteine rich proteins with sequence similarity to SCR (S locus cysteine-rich protein).	0.001378	12.56	21.31	27.4	30.6	13.68	7.666	6.85	4.701
AT5G25830	28.745	16.1225	0.56088	Down	GATA TRANSCRIPTION FACTOR 12 (GATA12)	Encodes a member of the GATA factor family of zinc finger transcription factors.	0.001378	24.64	30.28	28.78	31.28	20.06	15.18	17.19	12.06
ATCG00180	12.215	32.4	2.65248	Up	(RPOC1)	RNA polymerase beta' subunit-1	0.001378	12	13.5	11.53	11.83	21.98	18.1	19.67	69.85
AT3G01250	23.415	9.105	0.388853	Down		transmembrane protein;(source:Araport11)	0.001379	15.83	28.4	26.73	22.7	16.06	7.744	7.787	4.829
AT3G15280	8.17125	3.677	0.449992	Down		hypothetical protein;(source:Araport11)	0.001383	6.792	9.35	7.529	9.014	3.527	3.805	4.383	2.993
AT3G61160	14.9987	4.552	0.303492	Down		Protein kinase superfamily protein;(source:Araport11)	0.001383	17.51	11.25	23.99	7.245	8.093	5.387	2.362	2.366
AT4G14780	10.7037	5.67575	0.530258	Down		Protein kinase superfamily protein;(source:Araport11)	0.001383	10.87	11	7.595	13.35	4.869	5.153	5.558	7.123
AT1G15440	11.9833	19.805	1.65272	Up	PERIODIC TRYPTOPHAN PROTEIN 2 (PWP2)	Encodes a nucleolar protein that is a ribosome biogenesis co-factor. Mutants display aberrant RNA processing and female gametophyte development.	0.001383	13.37	12.66	9.703	12.2	17.09	17.32	17.99	26.82
AT3G28840	54.2375	21.465	0.395759	Down		hypothetical protein (DUF1216);(source:Araport11)	0.001383	43.69	61.7	44.08	67.48	39.13	21.18	14.29	11.26
AT2G02990	80.93	44.0475	0.544267	Down	RIBONUCLEASE 1 (RNS1)	Encodes a member of the ribonuclease T2 family that responds to inorganic phosphate starvation, and inhibits production of anthocyanin. Also involved in wound-induced signaling independent of jasmonic acid. Its expression is responsive to both phosphate (Pi) and phosphite (Phi) in roots.	0.001383	54.76	93.4	84.7	90.86	53.26	42.98	45.28	34.67
AT4G00880	17.58	9.75475	0.554878	Down	SMALL AUXIN UPREGULATED RNA 31 (SAUR31)	SAUR-like auxin-responsive protein family;(source:Araport11)	0.001387	16.75	18.5	14.78	20.29	10.9	10.82	9.47	7.829
AT1G12070	14.3475	5.71625	0.398414	Down		Immunoglobulin E-set superfamily protein;(source:Araport11)	0.001388	11.46	19.3	14.92	11.71	9.44	5.189	4.329	3.907
AT1G80130	9.525	3.85125	0.404331	Down		Tetratricopeptide repeat (TPR)-like superfamily protein;(source:Araport11)	0.001414	4.419	10.05	7.891	15.74	3.649	4.179	3.874	3.703
AT3G13610	4.369	1.9985	0.457427	Down	(F6'H1)	Encodes a Fe(II)- and 2-oxoglutarate-dependent dioxygenase family gene F6'H1. Mutations in this gene compromise iron uptake and the production of fluorescent phenolics involved in Fe uptake. The mRNA is cell-to-cell mobile.	0.001414	4.605	4.198	4.233	4.44	1.312	1.972	2.44	2.27
AT3G25810	0.721775	0.03613	0.0500572	Down		Terpenoid cyclases/Protein prenyltransferases superfamily protein;(source:Araport11)	0.001432	1.215	0.1341	1.538	0	0.05387	0.05467	0.0167	0.01928
AT5G52360	141.225	59.29	0.419827	Down	ACTIN DEPOLYMERIZING FACTOR 10 (ADF10)	ADF10 is an actin-depolymerizing factor that preferentially binds ADP-G-actin and inhibits G-actin nucleotide exchange. ADF10 promotes actin turnover in pollen , regulating organization of actin filaments and vesicle trafficking during pollen tube growth.	0.00144	112.7	130.1	202.1	120	89.87	57	61.71	28.58
AT2G33010	3.76025	1.801	0.478958	Down		Ubiquitin-associated (UBA) protein;(source:Araport11)	0.001446	4.684	3.867	3.806	2.684	2.012	1.794	1.659	1.739
ATCG00780	8.731	24.23	2.77517	Up	RIBOSOMAL PROTEIN L14 (RPL14)	encodes a chloroplast ribosomal protein L14, a constituent of the large subunit of the ribosomal complex	0.001488	8.861	9.645	9.144	7.274	18.7	12.54	17.79	47.89
AT5G39470	10.0403	3.2711	0.325799	Down		F-box family protein;(source:Araport11)	0.001491	9.654	9.067	11.16	10.28	3.169	3.856	5.091	0.9684
AT1G80110	26.6725	15.9	0.59612	Down	PHLOEM PROTEIN 2-B11 (PP2-B11)	phloem protein 2-B11;(source:Araport11)	0.001497	26.82	22.96	25.95	30.96	16.52	13.48	16.97	16.63
AT2G19385	10.9795	17.7125	1.61323	Up		zinc ion binding protein;(source:Araport11)	0.001506	12.33	11.58	8.698	11.31	15.8	18.8	18.54	17.71
AT1G23390	4.77925	8.96475	1.87577	Up	KELCH DOMAIN-CONTAINING F-BOX PROTEIN (KFB)	A kelch domain-containing F-box protein. Its N terminus contains a typical F-box motif but its C-terminal domain only consists of one predicted kelch motif. Predicted to be stu Interacts with chalcone synthase CHS to mediate CHS ubiquitination and degradation.	0.001506	6.611	4.233	3.51	4.763	7.57	7.642	9.817	10.83
AT1G31660	33.44	50.9025	1.5222	Up	ESSENTIAL NUCLEAR PROTEIN 1 (ENP1)	Encodes a protein that is a ribosome biogenesis co-factor. Mutants display aberrant RNA processing and male and female gametophyte development.	0.001509	36.23	38.45	26.1	32.98	45.69	54.43	50.84	52.65
AT2G47050	379.575	150.062	0.395343	Down	(PMEIL)	Encodes a pollen-expressed pectin methylesterase inhibitor that affects male fertility by regulating pollen viability and pollen tube growth.	0.001513	280.7	365.8	515.8	356	275.4	127.1	113.5	84.25
AT2G13570	46.5525	20.215	0.434241	Down	NUCLEAR FACTOR Y, SUBUNIT B7 (NF-YB7)	nuclear factor Y, subunit B7;(source:Araport11)	0.001514	28.27	47.45	57.4	53.09	31.66	17.75	18.86	12.59
AT2G13431	0.1748	1.00962	5.77589	Up		transposable_element_gene;(source:Araport11)	0.001514	0.1786	0.4056	0.115	0	1.54	0.5307	1.253	0.7148
AT4G14080	445.275	249.95	0.561338	Down	MATERNAL EFFECT EMBRYO ARREST 48 (MEE48)	Involved in the formation of the pollen wall. DYT1 and bHLH089 specifically recognize the TCATGTGC box to activate expression.	0.00152	502	412.2	504.2	362.7	191.2	283.2	219.7	305.7
AT2G13116	2.212	0.370588	0.167535	Down		pseudogene of F-box and associated interaction domains-containing protein;(source:Araport11)	0.001525	1.115	2.413	3.984	1.336	0.8506	0.3873	0.1859	0.05855
AT4G10850	37.1125	21.5925	0.581812	Down	(SWEET7)	Nodulin MtN3 family protein;(source:Araport11)	0.001527	28.54	39.73	41.53	38.65	20.88	23.83	22.64	19.02
AT3G14040	432.075	200.575	0.464213	Down		Pectin lyase-like superfamily protein;(source:Araport11)	0.001533	313.9	445.7	576.3	392.4	307.8	160.9	189.5	144.1
AT4G26600	6.19775	10.6773	1.72276	Up	(NOP2B)	S-adenosyl-L-methionine-dependent methyltransferases superfamily protein;(source:Araport11)	0.001538	5.941	7.551	5.208	6.091	8.739	9.552	9.758	14.66
AT1G63060	56.09	26.085	0.465056	Down		ribosome biogenesis NEP1-like protein;(source:Araport11)	0.001549	45.94	65.73	62.44	50.25	37.98	22.98	29.49	13.89
AT1G71691	2.68175	1.04317	0.38899	Down		GDSL-motif esterase/acyltransferase/lipase. Enzyme group with broad substrate specificity that may catalyze acyltransfer or hydrolase reactions with lipid and non-lipid substrates.	0.00155	2.166	2.42	3.322	2.819	1.34	0.85	1.233	0.7497
AT3G13080	6.245	10.9252	1.74944	Up	ATP-BINDING CASSETTE C3 (ABCC3)	encodes an ATP-dependent MRP-like ABC transporter able to transport glutathione-conjugates as well as chlorophyll catabolites. The expression of this gene is upregulated by herbicide safeners such as benoxacor and fenclorim.	0.001553	6.8	7.086	4.501	6.593	8.369	10.19	9.562	15.58
AT3G03430	40.8125	18.0775	0.44294	Down		Calcium-binding EF-hand family protein;(source:Araport11)	0.001557	29.93	54.89	30.38	48.05	25.85	16.64	14.81	15.01
AT4G01430	34.8875	19.9425	0.571623	Down	USUALLY MULTIPLE ACIDS MOVE IN AND OUT TRANSPORTERS 29 (UMAMIT29)	Encodes a plasma membrane-localized amino acid transporter likely involved in amino acid export in the developing seed.	0.001571	33.47	35.04	39.11	31.93	18.77	24.99	21.03	14.98
AT2G07213	0.052825	0.4746	8.98438	Up		Natural antisense transcript overlaps with AT2G07215;(source:Araport11)	0.001605	0	0.01325	0.02405	0.174	0.164	0.4538	0.747	0.5336
ATCG00360	34.51	83.9675	2.43314	Up	(YCF3)	Encodes a protein required for photosystem I assembly and stability. In Chlamydomonas reinhardtii, this protein seems to act as a PSI specific chaperone facilitating the assembly of the complex by interacting with PsaA and PsaD. A loss of function mutation in tobacco leads to a loss of photosystem I.	0.001623	28.68	35.52	52.71	21.13	77.9	53.15	69.92	134.9
AT3G21180	13.565	5.79125	0.426926	Down	AUTOINHIBITED CA(2+)-ATPASE 9 (ACA9)	one of the type IIB calcium pump isoforms. encodes an autoinhibited Ca(2+)-ATPase that contains an N-terminal calmodulin binding autoinhibitory domain.	0.001642	11.45	15.12	16.86	10.83	9.891	5.176	4.917	3.181
ATCG01110	2.56625	8.6255	3.36113	Up	NAD(P)H DEHYDROGENASE SUBUNIT H (NDHH)	Encodes the 49KDa plastid NAD(P)H dehydrogenase subunit H protein. Its transcription is regulated by an ndhF-specific plastid sigma factor, SIG4.	0.001646	2.303	4.106	1.68	2.176	5.544	4.12	5.408	19.43
AT5G58010	1.44375	0.44805	0.310338	Down	LJRHL1-LIKE 3 (LRL3)	Encodes a basic helix-loop-helix (bHLH) protein that regulates root hair development. One of the three Arabidopsis homologs of the Lotus japonicus ROOTHAIRLESS1 (LjRHL1) gene: At2g24260 (AtLRL1), At4g30980 (AtLRL2), and At5g58010 (AtLRL3).	0.001656	1.109	1.14	2.21	1.316	0.5831	0.4602	0.3314	0.4175
ATCG01180	3.273	7.13925	2.18126	Up	RIBOSOMAL RNA23S (RRN23S.2)	chloroplast-encoded 23S ribosomal RNA	0.001672	2.882	3.869	3.756	2.585	6.582	4.737	5.318	11.92
AT5G67265	10.2545	2.48055	0.241899	Down		hypothetical protein;(source:Araport11)	0.001685	6.81	8.698	11.94	13.57	4.852	2.547	2.074	0.4492
AT5G61630	16.54	6.74575	0.407845	Down		transmembrane protein;(source:Araport11)	0.001685	11.41	18.52	15.64	20.59	9.913	6.422	7.1	3.548
AT4G13230	85.3975	33.7075	0.394713	Down		Late embryogenesis abundant protein (LEA) family protein;(source:Araport11)	0.001738	45.21	100.4	109.5	86.48	57.99	29.69	26.17	20.98
AT1G55560	68.01	25.1	0.369063	Down	SKU5 SIMILAR 14 (sks14)	SKU5 similar 14;(source:Araport11)	0.001749	64.83	45.57	125.3	36.34	37.08	26.22	20.87	16.23
AT5G03230	9.21	15.8225	1.71797	Up		senescence regulator (Protein of unknown function, DUF584);(source:Araport11)	0.001749	8.717	8.749	8.894	10.48	15.07	16.73	17.7	13.79
AT4G32720	25.865	41.0775	1.58815	Up	LA PROTEIN 1 (La1)	Encodes AtLa1, a member of the highly abundant phosphoprotein La proteins. Predominantly localized to the nucleoplasm and was also detected in the nucleolar cavity. Has RNA binding activity. Required for normal ribosome biogenesis and embryogenesis.	0.001755	27.59	28.51	22.19	25.17	33.39	38.64	40.14	52.14
AT1G30800	6.935	2.861	0.412545	Down		Fasciclin-like arabinogalactan family protein;(source:Araport11)	0.001774	6.033	5.375	10.41	5.922	3.444	3.154	3.012	1.834
AT5G28970	0.5555	0.16072	0.289325	Down		transposable_element_gene;(source:Araport11);similar to Ulp1 protease family protein [Arabidopsis thaliana] (TAIR:AT1G35110.1);(source:TAIR10)	0.00178	0.2581	0.5695	0.7324	0.662	0.2782	0.1568	0.07608	0.1318
AT1G08065	7.13475	3.05625	0.428361	Down	ALPHA CARBONIC ANHYDRASE 5 (ACA5)	alpha carbonic anhydrase 5;(source:Araport11)	0.001808	10.38	6.514	6.572	5.073	2.219	4.553	2.556	2.897
ATCG00710	28.555	76.09	2.66468	Up	PHOTOSYSTEM II REACTION CENTER PROTEIN H (PSBH)	Encodes a 8 kD phosphoprotein that is a component of the photosystem II oxygen evolving core. Its exact molecular function has not been determined but it may play a role in mediating electron transfer between the secondary quinone acceptors, QA and QB, associated with the acceptor side of PSII.	0.001814	25.66	39.37	27.3	21.89	56.08	43.8	49.78	154.7
AT2G31880	3.96375	7.01225	1.76909	Up	SUPPRESSOR OF BIR1 1 (SOBIR1)	Encodes a putative leucine rich repeat transmembrane protein that is expressed in response to Pseudomonas syringae. Expression of SRRLK may be required for silencing via lsiRNAs. Regulates cell death and innate immunity.	0.001814	4.251	4.346	3.598	3.66	5.728	8.882	5.83	7.609
AT1G24230	3.227	1.2685	0.39309	Down		Paired amphipathic helix (PAH2) superfamily protein;(source:Araport11)	0.001814	3.29	3.438	3.358	2.822	0.779	1.272	1.388	1.635
ATCG00330	16.485	44.685	2.71065	Up	CHLOROPLAST RIBOSOMAL PROTEIN S14 (RPS14)	30S chloroplast ribosomal protein S14	0.001826	16.35	21.57	16.41	11.61	31.67	26	30.19	90.88
AT1G78830	11.5433	20.4425	1.77095	Up		Curculin-like (mannose-binding) lectin family protein;(source:Araport11)	0.00183	12.43	11.54	13.96	8.243	18.71	17.2	21.29	24.57
AT5G44265	85.84	47.28	0.550792	Down		Encodes a Protease inhibitor/seed storage/LTP family protein. Predicted to be a member of PR-14 pathogenesis-related protein family with the following members: At2g38540/LTP1, At2g38530/LTP2, At5g59320/LTP3, At5g59310/LTP4, At3g51600/LTP5, At3g08770/LTP6, At2g15050/LTP7, At2g18370/LTP8, At2g15325/LTP9, At5g01870/LTP10, At4g33355/LTP11, At3g51590/LTP12, At5g44265/LTP13, At5g62065/LTP14, At4g08530/…	0.001839	79.26	97.39	84.36	82.35	53.86	51.39	54.25	29.62
AT2G36800	1.9155	3.97275	2.074	Up	DON-GLUCOSYLTRANSFERASE 1 (DOGT1)	Encodes a DON-Glucosyltransferase. The UGT73C5 glucosylates both brassinolide and castasterone in the 23-O position. The enzyme is presumably involved in the homeostasis of those steroid hormones hence regulating BR activity. Transgenic plants overexpressing UGT73C5 show a typical BR-deficient phenotype.	0.001843	1.632	1.719	2.096	2.215	3.445	3.21	4.303	4.933
AT5G56950	18.86	29.65	1.57211	Up	NUCLEOSOME ASSEMBLY PROTEIN 1;3 (NAP1;3)	Encodes a member of a small gene family of proteins with similarity to nucleosome assembly proteins.May function in nucleotide excision repair. Loss of function mutations have no obvious visible phenotypes but do seem to affect transcription of NER related genes. Plants mutated in three ubiquitously expressed NAP1 genes (NAP1;1~NAP1;3) and organ-specifically expressed NAP1;4 gene show hypersensit…	0.001843	21.02	23.06	14.95	16.41	27.84	30.2	28.07	32.49
AT3G57157	73.8925	29.75	0.402612	Down	SHORT OPEN READING FRAME 5 (SORF5)	Has been identified as a translated small open reading frame by ribosome profiling.	0.001867	70.84	65.94	101	57.79	32.62	32.82	41.58	11.98
AT4G12600	246.2	380.025	1.54356	Up		Ribosomal protein L7Ae/L30e/S12e/Gadd45 family protein;(source:Araport11)	0.001867	249.3	235.1	226.6	273.8	323.3	431.1	368.6	397.1
AT2G35040	32.3675	49.8475	1.54005	Up		AICARFT/IMPCHase bienzyme family protein;(source:Araport11)	0.001875	35.47	35.37	24.27	34.36	44.67	47.52	47.65	59.55
AT1G76600	0.534625	1.5125	2.82909	Up		PADRE protein up-regulated after infection by S. sclerotiorun.	0.001878	0.4608	0.4414	0.5842	0.6521	1.014	1.715	1.358	1.963
AT1G61290	1.81622	0.369765	0.20359	Down	SYNTAXIN OF PLANTS 124 (SYP124)	member of SYP12 Gene Family	0.00188	3.329	1.374	2.01	0.5519	0.4911	0.646	0.2443	0.09766
AT5G07571	18.51	7.76325	0.419408	Down		Oleosin family protein;(source:Araport11)	0.001908	11.11	16.77	27.64	18.52	9.343	7.66	9.186	4.864
AT1G23935	1.73362	4.68375	2.70171	Up		apoptosis inhibitory protein;(source:Araport11)	0.001912	2.004	1.993	0.9695	1.968	2.296	3.55	3.898	8.991
AT1G68990	5.35725	8.78225	1.63932	Up	MALE GAMETOPHYTE DEFECTIVE 3 (MGP3)	MGP3 (male gametophyte-defective 3) belongs to a small family of nuclear-encoded Phage type RNA polymerases (RPOTs) involved in the transcription of mitochondrial genes in Arabidopsis thaliana. Mutation in MGP 3 significantly retarded pollen tube growth and caused defective embryo development.	0.001936	6.256	6.075	4.33	4.768	7.535	7.801	8.493	11.3
AT1G77030	9.49125	18.6875	1.96892	Up	DEAD-BOX RNA HELICASE 29 (RH29)	Required for functional maturation of male and female gametophytes.	0.001949	10.66	11.32	6.101	9.884	13.17	15.45	15.35	30.78
AT2G34430	24.865	52.8225	2.12437	Up	LIGHT-HARVESTING CHLOROPHYLL-PROTEIN COMPLEX II SUBUNIT B1 (LHB1B1)	Photosystem II type I chlorophyll a/b-binding protein The mRNA is cell-to-cell mobile.	0.001951	45.43	20.62	19.46	13.95	43.69	50.03	58.37	59.2
AT3G49790	0.8176	2.08	2.54403	Up		Carbohydrate-binding protein;(source:Araport11)	0.002014	0.8632	1.02	0.7107	0.6765	1.426	1.471	2.144	3.279
AT1G12920	13.405	20.885	1.558	Up	EUKARYOTIC RELEASE FACTOR 1-2 (ERF1-2)	Encodes a eukaryotic release factor one homolog.	0.002014	14.87	13.97	12.1	12.68	20.02	18.6	19.67	25.25
AT5G58370	5.99125	10.1493	1.69401	Up	(ENGB-3)	P-loop containing nucleoside triphosphate hydrolases superfamily protein;(source:Araport11)	0.002035	7.375	6.42	4.533	5.637	8.151	9.756	10.01	12.68
ATMG00060	26.4775	53.38	2.01605	Up			0.002037	22.76	32.18	26.55	24.42	47.26	33.53	45	87.73
AT5G64540	3.483	1.38187	0.396748	Down		mucin-like protein;(source:Araport11)	0.002049	4.438	2.547	4.104	2.843	1.373	1.596	1.789	0.7695
AT5G58730	7.22125	3.9495	0.546927	Down	MYO-INOSITOL KINASE (MIK)	pfkB-like carbohydrate kinase family protein;(source:Araport11)	0.002056	6.608	7.676	6.463	8.138	4.423	3.845	3.882	3.648
AT3G43120	59.45	19.6375	0.33032	Down	SMALL AUXIN UPREGULATED RNA 39 (SAUR39)	SAUR-like auxin-responsive protein family;(source:Araport11)	0.002059	47.19	53.67	74.64	62.3	41.14	16.82	13.61	6.98
AT1G06720	15.35	29.81	1.94202	Up		P-loop containing nucleoside triphosphate hydrolases superfamily protein;(source:Araport11)	0.00206	15.31	16.85	13.61	15.63	23.3	21.91	22.34	51.69
AT3G51590	2847	1431.1	0.502669	Down	LIPID TRANSFER PROTEIN 12 (LTP12)	Encodes a member of the lipid transfer protein family. Proteins of this family are generally small (~9 kD), basic, expressed abundantly and contain eight Cys residues. The proteins can bind fatty acids and acylCoA esters and can transfer several different phospholipids. They are localized to the cell wall. The LTP12 promoter is active exclusively in the tapetum during the uninucleate microspore a…	0.00206	3031	2309	3350	2698	1320	1843	1716	845.4
AT1G68560	170.075	271.725	1.59768	Up	ALPHA-XYLOSIDASE 1 (XYL1)	Encodes a bifunctional alpha-l-arabinofuranosidase/beta-d-xylosidase that belongs to family 3 of glycoside hydrolases.	0.00206	169	177.9	169.5	163.9	272.3	226.3	266.4	321.9
AT2G26530	1.83575	4.7365	2.58014	Up	(AR781)	Pheromone receptor-like protein involved in the early elicitor signaling events which occur within minutes and include ion fluxes across the plasma membrane, activation of MPKs and the formation of ROS related to PGPS1 and WRKY33.	0.00206	1.556	1.262	3.13	1.395	4.471	5.303	3.988	5.184
AT5G45140	8.9715	15.115	1.68478	Up	NUCLEAR RNA POLYMERASE C2 (NRPC2)	Encodes a subunit of RNA polymerase III (aka RNA polymerase C).	0.002084	9.515	9.549	7.244	9.578	11.81	13.76	13.36	21.53
AT5G07600	48.6225	27.9525	0.574888	Down		Oleosin family protein;(source:Araport11)	0.002087	41.3	43.1	59.25	50.84	27.06	28.4	32.29	24.06
AT3G13150	15.935	24.4	1.53122	Up		Tetratricopeptide repeat (TPR)-like superfamily protein;(source:Araport11)	0.002091	18.64	15.94	14.44	14.72	24.42	24.42	25.87	22.89
AT3G32925	1.86613	4.1765	2.23806	Up		transposable_element_gene;(source:Araport11);non-LTR retrotransposon family (LINE), has a 3.1e-13 P-value blast match to GB:AAB41224 ORF2 (LINE-element) (Rattus norvegicus);(source:TAIR10)	0.002127	2.642	1.997	0.8625	1.963	3.845	3.597	4.06	5.204
ATMG00513	5.4425	11.239	2.06504	Up	NADH DEHYDROGENASE SUBUNIT 5 (NAD5)	Mitochondrial NADH dehydrogenase subunit 5. The gene is trans-spliced from three different pre-cursors. Previously there were three AGI identifiers for the individual trans-spliced sections.	0.002131	4.529	7.096	5.613	4.532	9.721	7.677	9.918	17.64
ATCG00550	11.8087	39.2325	3.32232	Up	PHOTOSYSTEM II REACTION CENTER PROTEIN J (PSBJ)	PSII component	0.002132	8.075	15.76	9.1	14.3	24.98	18.26	30.89	82.8
AT5G49850	0.73965	0.235375	0.318225	Down		Mannose-binding lectin superfamily protein;(source:Araport11)	0.002144	0.6589	0.9029	0.7637	0.6331	0.3847	0.1835	0.2497	0.1236
AT2G33210	14.41	24.9725	1.733	Up	HEAT SHOCK PROTEIN 60-2 (HSP60-2)	Involved in the RNA splicing of rpl2 and ccmFC introns in mitochondria.	0.002146	15.3	16.79	10.95	14.6	20.67	19.72	23.16	36.34
AT5G59310	278.875	146.75	0.526221	Down	LIPID TRANSFER PROTEIN 4 (LTP4)	Encodes a member of the lipid transfer protein family. Proteins of this family are generally small (~9 kD), basic, expressed abundantly and contain eight Cys residues. The proteins can bind fatty acids and acylCoA esters and can transfer several different phospholipids. They are localized to the cell wall. The mRNA is present in flowers and siliques, and is strongly up-regulated by abscisic acid.…	0.002149	187.4	274.9	349.5	303.7	181.2	154.4	147.8	103.6
AT5G08180	101.428	155.075	1.52892	Up		Ribosomal protein L7Ae/L30e/S12e/Gadd45 family protein;(source:Araport11)	0.002186	103.9	110.9	85.01	105.9	153.1	182.7	156.8	127.7
AT1G70220	3.9405	1.7465	0.443218	Down		RNA-processing, Lsm domain-containing protein;(source:Araport11)	0.002197	4.366	3.852	3.257	4.287	1.483	2.315	1.473	1.715
AT1G52890	5.8025	10.0723	1.73585	Up	NAC DOMAIN CONTAINING PROTEIN 19 (NAC019)	encodes a NAC transcription factor whose expression is induced by drought, high salt, and abscisic acid. This gene binds to ERD1 promoter in vitro.	0.002254	7.232	5.341	4.835	5.802	9.045	9.744	9.69	11.81
AT5G63850	14.38	8.027	0.558206	Down	AMINO ACID PERMEASE 4 (AAP4)	Amino acid transporter whose expression is downregulated by dehydration.	0.002286	10.6	16.06	17.34	13.52	8.734	8.681	7.884	6.809
AT2G45135	30.8975	15.1862	0.491504	Down		RING/U-box superfamily protein;(source:Araport11)	0.002339	25.86	27.13	42.84	27.76	16.51	18.59	16.7	8.945
AT5G06690	17.215	29.6775	1.72393	Up	WCRKC THIOREDOXIN 1 (WCRKC1)	Encodes a thioredoxin (WCRKC1) localized in chloroplast stroma. Contains a WCRKC motif. Functions in redox cascade with 2CPA and 2CPB via the ferredoxin-thioredoxin reductase (FTR)/thioredoxin (Trx) pathway to mediate the light-responsive reductive control of target proteins. Oxidizes redox-regulated proteins.	0.002353	21.69	16.77	18.6	11.8	26.86	29.22	31.98	30.65
AT2G38210	1.492	3.442	2.30697	Up	PUTATIVE PDX1-LIKE PROTEIN 4 (PDX1L4)	putative PDX1-like protein 4;(source:Araport11)	0.002392	1.91	1.609	1.154	1.295	3.504	3.654	3.213	3.397
AT1G07135	1.7165	5.05475	2.9448	Up		glycine-rich protein;(source:Araport11)	0.002392	1.15	1.492	1.442	2.782	2.519	6.413	4.016	7.271
AT2G23350	58.005	90.8575	1.56637	Up	POLY(A) BINDING PROTEIN 4 (PAB4)	polyadenylate-binding protein, putative / PABP, putative.Member of the Class II family of PABP proteins. Highly and ubiquitously expressed. The mRNA is cell-to-cell mobile.	0.002397	62.05	66.59	42.55	60.83	86.42	78.74	85.27	113
AT1G59990	5.6865	9.53925	1.67753	Up	EMBRYO DEFECTIVE 3108 (EMB3108)	DEA(D/H)-box RNA helicase family protein;(source:Araport11)	0.002457	7.503	6.162	4.228	4.853	8.713	8.734	10.01	10.7
AT5G42235	1.97425	0.685125	0.347031	Down		Encodes a defensin-like (DEFL) family protein.	0.002463	1.939	1.85	1.679	2.429	0.5997	0.7159	0.8566	0.5683
AT1G62450	22.7825	10.5047	0.461089	Down		Immunoglobulin E-set superfamily protein;(source:Araport11)	0.002463	15.21	27.37	28.79	19.76	14.96	8.831	10.36	7.868
AT1G54860	18.285	9.1915	0.50268	Down		Glycoprotein membrane precursor GPI-anchored;(source:Araport11)	0.002491	13.54	18.09	23.41	18.1	11.38	7.926	10.45	7.01
AT5G05560	4.163	6.89175	1.65548	Up	EMBRYO DEFECTIVE 2771 (EMB2771)	Encodes a subunit of the Arabidopsis thaliana E3 ubiquitin ligase complex that plays a synergistic role with APC4 both in female gametogenesis and in embryogenesis.	0.002518	5.165	4.82	2.995	3.672	6.025	6.142	6.546	8.854
AT5G64510	8.287	3.953	0.477012	Down	TUNICAMYCIN INDUCED 1 (TIN1)	Encodes Tunicamycin Induced 1(TIN1), a plant-speci_x001E_c ER stress-inducible protein. TIN1 mutation affects pollen surface morphology. Transcriptionally induced by treatment with the N-linked glyclsylation inhibitor tunicamycin.	0.002523	9.768	6.08	11.53	5.77	4.136	4.346	3.3	4.03
AT2G41640	1.13018	2.4925	2.20541	Up		Glycosyltransferase family 61 protein;(source:Araport11)	0.002569	1.181	1.262	0.6247	1.453	2.075	2.979	2.077	2.839
AT1G07750	121.145	72.7	0.600107	Down		RmlC-like cupins superfamily protein;(source:Araport11)	0.002569	122.2	98.38	129.6	134.4	81.37	75.55	77.68	56.2
AT5G61720	200.65	88.0725	0.438936	Down		hypothetical protein (DUF1216);(source:Araport11)	0.002584	130	229	204.8	238.8	157	69	62.14	64.15
AT1G08910	28.93	44.8575	1.55055	Up	PROTEIN INHIBITOR OF ACTIVATED STAT LIKE 1 (PIAL1)	Encodes an SP-RING domain containing protein that functions in sumolaytion and is involved in positive regulation of sulfur metabolism and stress response.	0.002584	29.03	28.54	32.84	25.31	40.16	49.02	44.96	45.29
AT5G34800	1.13738	3.25925	2.86559	Up		transposable_element_gene;(source:Araport11);pseudogene, hypothetical protein, predicted proteins - Arabidopsis thaliana;(source:TAIR10)	0.002639	0.8656	1.391	0.6819	1.611	1.914	2.695	2.149	6.279
AT5G13830	4.526	9.07675	2.00547	Up	TRNA METHYLTRANSFERASE 7C (TRM7C)	FtsJ-like methyltransferase family protein;(source:Araport11)	0.002639	5.518	4.725	3.885	3.976	7.754	11.87	7.799	8.884
AT4G25490	0.296325	1.2735	4.29765	Up	C-REPEAT/DRE BINDING FACTOR 1 (CBF1)	Transcriptional activator that binds to the DRE/CRT regulatory element and induces COR (cold-regulated) gene expression increasing plant freezing tolerance. It encodes a member of the DREB subfamily A-1 of ERF/AP2 transcription factor family (CBF1). The protein contains one AP2 domain. There are six members in this subfamily, including CBF1, CBF2, and CBF3. This gene is involved in response to lo…	0.002642	0.1312	0.447	0.3381	0.269	0.7964	0.957	0.7146	2.626
AT4G30770	3.239	0.908925	0.280619	Down		Putative membrane lipoprotein;(source:Araport11)	0.002663	3.522	3.166	4.368	1.9	1.644	1.172	0.3581	0.4616
AT3G25290	9.2805	4.4315	0.477507	Down		Auxin-responsive family protein;(source:Araport11)	0.002672	8.064	9.157	11.64	8.261	6.338	4.722	3.542	3.124
AT5G55410	1.58	0.5079	0.321456	Down		Bifunctional inhibitor/lipid-transfer protein/seed storage 2S albumin superfamily protein;(source:Araport11)	0.002673	1.559	1.353	1.53	1.878	0.4884	0.7289	0.6086	0.2057
AT1G57550	20.5425	8.5525	0.416332	Down		Low temperature and salt responsive protein family;(source:Araport11)	0.002688	14.49	22.38	22.02	23.28	10.72	8.013	7.666	7.811
AT4G10040	64.265	35.4225	0.551194	Down	CYTOCHROME C-2 (CYTC-2)	Encodes cytochrome c. Promoter directs preferential expression in vascular tissues of cotyledons, leaves, roots, and hypocotyls, and in anthers. Double mutants with CYTC-1 accumulate starch during the day, have delayed growth and development and reduced GA and DELLA proteins linking cellular metabolism and GA homeostasis.	0.00269	49.58	69.37	72.28	65.83	41.78	40.47	35.11	24.33
AT2G31660	16.26	24.5525	1.50999	Up	SUPER SENSITIVE TO ABA AND DROUGHT2 (SAD2)	SAD2 (super sensitive to ABA and drought 2) encodes an importin beta-domain family protein likely to be involved in nuclear transport in ABA signaling. Subcellular localization of GFP-tagged SAD2 showed a predominantly nuclear localization, consistent with a role for SAD2 in nuclear transport. Mutation of SAD2 in Arabidopsis alters abscisic acid sensitivity. SAD2 was ubiquitously expressed at low…	0.002743	17.58	19.45	12.62	15.39	24.75	22.25	26.22	24.99
AT1G23410	20.6125	33.0175	1.60182	Up	(RPS27AA)	cytosolic ribosomal protein gene, part of eS31 family	0.002746	19.06	19.68	21.33	22.38	33.55	33.97	30.29	34.26
AT1G50990	1.8515	0.7422	0.400864	Down	BRASSINOSTEROID-SIGNALING KINASE 11 (BSK11)	kinase with tetratricopeptide repeat domain-containing protein;(source:Araport11)	0.002806	1.861	1.692	2.346	1.507	0.9782	0.6838	0.6065	0.7003
AT1G13950	41.9925	22.305	0.531166	Down	EUKARYOTIC ELONGATION FACTOR 5A-1 (ELF5A-1)	Encodes eukaryotic translation initiation factor 5A (EIF-5A).In mammalian cells it functions as a shuttle protein that translocates mRNA from the nucleus to cytoplasmic ribosomes. Overexpression results in an increase in both primary and secondary xylem formation. In RNAi suppressed lines, xylem formation is reduced.	0.002808	31.91	43.58	47.53	44.95	29.59	20.55	24.03	15.05
AT3G28750	106.37	48.235	0.453464	Down		hypothetical protein;(source:Araport11)	0.002808	95.08	121.7	112.8	95.9	87.42	38.33	38.46	28.73
AT2G40140	5.19575	8.72575	1.6794	Up	(CZF1)	zinc finger (CCCH-type) family protein;(source:Araport11)	0.002817	6.904	5.042	4.055	4.782	7.213	10.25	9.282	8.158
AT5G09420	7.124	11.353	1.59363	Up	TRANSLOCON AT THE OUTER MEMBRANE OF CHLOROPLASTS 64-V (TOC64-V)	Encodes one of the 36 carboxylate clamp (CC)-tetratricopeptide repeat (TPR) proteins (Prasad 2010, Pubmed ID: 20856808) with potential to interact with Hsp90/Hsp70 as co-chaperones.	0.002817	6.74	7.731	5.656	8.369	10.63	9.992	11.73	13.06
AT3G18360	119.713	60.1525	0.502475	Down	VQ MOTIF-CONTAINING PROTEIN 20 (VQ20)	Member of VQ gene family. VQ proteins are named for the VQ motif (FxxxVQxxTG), a conserved amino acid region. Interacts with members of WRKY gene family, involved in pollen development.	0.002817	77.95	119.4	172.9	108.6	75.37	54.83	65.54	44.87
AT4G30993	87.6725	51.6	0.588554	Down		Calcineurin-like metallo-phosphoesterase superfamily protein;(source:Araport11)	0.002835	93.28	81.28	70.93	105.2	55.87	62.9	51.06	36.57
AT3G07050	44.1325	76.245	1.72764	Up	NUCLEOSTEMIN-LIKE 1 (NSN1)	Arabidopsis NSN1 encodes a nucleolar GTP- binding protein and is required for maintenance of inflorescence meristem identity and floral organ development.	0.00284	42.68	47.88	39.29	46.68	60.51	60.97	65.7	117.8
AT2G18100	7.18725	3.87775	0.539532	Down		transmembrane/coiled-coil protein (DUF726);(source:Araport11)	0.002845	6.109	7.433	7.128	8.079	4.673	4.1	4.144	2.594
AT1G15870	7.24925	12.2475	1.68949	Up		Mitochondrial glycoprotein family protein;(source:Araport11)	0.002855	6.982	7.733	6.53	7.752	12.27	12.77	13.54	10.41
AT3G04620	50.7075	29.4975	0.581719	Down	D NUCLDUO1-ACTIVATEEIC ACID BINDING PROTEIN 1 (DAN1)	Target promoter of the male germline-specific transcription factor DUO1.	0.002855	37.1	57.64	56.15	51.94	34.01	26.59	28.03	29.36
ATCG00770	7.94825	22.8125	2.87013	Up	RIBOSOMAL PROTEIN S8 (RPS8)	chloroplast 30S ribosomal protein S8	0.002869	8.754	8.353	10.23	4.456	16.25	14.41	14.85	45.74
AT1G49000	10.1338	4.2105	0.415493	Down		transmembrane protein;(source:Araport11)	0.002879	11.24	13.61	8.911	6.774	4.29	6.639	3.303	2.61
AT5G53680	1.55733	0.356225	0.228742	Down		RNA-binding (RRM/RBD/RNP motifs) family protein;(source:Araport11)	0.002879	1.866	0.9673	1.944	1.452	0.311	0.5917	0.5222	0
AT1G44160	0.5539	0.10927	0.197274	Down		HSP40/DnaJ peptide-binding protein;(source:Araport11)	0.002904	0.4852	0.3281	1.147	0.2553	0.1094	0.2081	0.07064	0.04894
AT4G01910	1.585	0.6815	0.429968	Down		Cysteine/Histidine-rich C1 domain family protein;(source:Araport11)	0.002909	1.36	1.637	1.433	1.91	0.8603	0.6801	0.6667	0.5189
AT4G36080	8.104	12.85	1.58564	Up	(TRA1B)	Component of the SPT module of the SAGA complex.	0.002918	8.518	9.423	6.872	7.603	11.8	10.43	11.88	17.29
AT1G07795	9.14475	3.77575	0.412887	Down		forkhead box protein G1;(source:Araport11)	0.002925	7.484	9.042	13.2	6.853	4.767	3.245	4.49	2.601
AT5G47740	5.076	2.4875	0.490051	Down		Adenine nucleotide alpha hydrolases-like superfamily protein;(source:Araport11)	0.002926	4.617	5.146	4.86	5.681	2.434	2.921	2.241	2.354
AT2G22805	13.2767	3.67617	0.276888	Down		Encodes a defensin-like (DEFL) family protein.	0.002926	9.197	16.07	12.68	15.16	7.292	3.34	3.257	0.8157
AT2G44230	2.0955	4.2945	2.04939	Up		hypothetical protein (DUF946);(source:Araport11)	0.002934	2.551	1.919	1.831	2.081	3.799	2.903	4.251	6.225
AT4G30920	22.5375	33.4825	1.48564	Up	LEUCYL AMINOPEPTIDASE 2 (LAP2)	Encodes LAP2, an aminopeptidase playing key roles in senescence, stress response and amino acid turnover.	0.002984	23.56	22.58	20.35	23.66	35.04	31.93	34.31	32.65
AT1G76650	0.042835	0.383775	8.95938	Up	CALMODULIN-LIKE 38 (CML38)	calmodulin-like 38;(source:Araport11)	0.003012	0.03729	0.04762	0.08643	0	0.1607	0.3625	0.4844	0.5275
AT4G30150	4.5505	8.61725	1.89369	Up		Urb2/Npa2 family protein;(source:Araport11)	0.003032	5.185	5.224	3.188	4.605	6.69	6.615	6.844	14.32
AT3G46180	22.96	14.4375	0.628811	Down	UDP-GALACTOSE TRANSPORTER 5 (UTR5)	UDP-galactose transporter 5;(source:Araport11)	0.003047	23.49	22.84	19.22	26.29	15.26	15.77	13.86	12.86
AT5G45350	81.415	50.17	0.616226	Down	GLYCINE AND PROLINE RICH PROTEIN 2 (GPRP2)	proline-rich family protein;(source:Araport11)	0.003063	74.27	74.43	86.9	90.06	58.09	50.08	50.72	41.79
AT3G03540	12.5475	7.03375	0.56057	Down	NON-SPECIFIC PHOSPHOLIPASE C5 (NPC5)	Encodes a nonspecific phospholipase C. Located in the cytosol. Involved in the conversion of phospholipids to glycolipids under phosphate deprivation conditions.	0.003063	9.13	14.79	12.99	13.28	8.145	5.723	7.215	7.052
AT4G29060	8.7675	16.49	1.88081	Up	EMBRYO DEFECTIVE 2726 (emb2726)	elongation factor Ts family protein;(source:Araport11)	0.003079	10.93	10.49	6.181	7.469	12.25	13.27	14.15	26.29
AT3G17185	49.2375	26.465	0.537497	Down	TRANS-ACTING SIRNA3 (TAS3)	Encodes a trans-acting siRNA (tasi-RNA) that regulates the expression of auxin response factor genes (ARF2, ARF4, ETT). One of 3 genomic loci that encode the TAS3 siRNA. Has been identified as a translated small open reading frame by ribosome profiling.	0.003087	49.62	46.66	54.7	45.97	27.16	37.99	24.41	16.3
ATMG00650	59.9075	107.44	1.79343	Up	NADH DEHYDROGENASE SUBUNIT 4L (NAD4L)	Encodes NADH dehydrogenase subunit 4L.	0.003093	52.18	67.74	64.65	55.06	93.3	85.76	89	161.7
AT1G01400	3.6655	1.54	0.420134	Down		hypothetical protein;(source:Araport11)	0.003105	4.853	3.617	2.904	3.288	1.774	2.147	1.087	1.152
AT1G15730	6.7565	10.7025	1.58403	Up		Cobalamin biosynthesis CobW-like protein;(source:Araport11)	0.003198	7.493	6.886	5.842	6.805	10.95	10.89	10.83	10.14
AT4G10260	53.0825	32.245	0.607451	Down	FRUCTOKINASE 4 (FRK4)	Encodes a member of the fructokinase gene family. Nomenclature according to Riggs 2017 has been adopted for the family by the community (personal communication, Boernke, Callis, Granot, Boernke, and Smeekens).	0.003225	52.58	51.65	55.18	52.92	32.34	26.85	41.11	28.68
AT3G51000	151.625	92.0925	0.60737	Down		alpha/beta-Hydrolases superfamily protein;(source:Araport11)	0.003225	161.3	160.5	155	129.7	95.35	95.6	109.6	67.82
AT1G60240	3.15175	1.34075	0.425399	Down		NAC (No Apical Meristem) domain transcriptional regulator superfamily protein;(source:Araport11)	0.003231	3.49	3.613	2.397	3.107	1.426	1.689	1.142	1.106
AT5G24790	29.0975	14.9485	0.513738	Down		transmembrane protein, putative (Protein of unknown function, DUF599);(source:Araport11)	0.003283	25.65	24.24	40.08	26.42	14.36	16.94	18.64	9.854
ATCG00920	1.6825	4.06125	2.41382	Up	RIBOSOMAL RNA16S (RRN16S.1)	chloroplast-encoded 16S ribosomal RNA	0.00333	1.574	1.691	2.254	1.211	4.151	2.408	3.685	6.001
AT4G12210	1.07005	0.18562	0.173469	Down		RING/U-box superfamily protein;(source:Araport11)	0.00333	0.9017	0.3455	1.672	1.361	0.3239	0.1096	0.251	0.05798
AT5G16750	3.321	5.9085	1.77913	Up	TORMOZEMBRYO DEFECTIVE (TOZ)	Encodes a nucleolar localized WD-40 repeat protein that is preferentially expressed in dividing cells and is required for regulated division planes and embryo development.	0.003338	3.896	3.366	2.376	3.646	4.587	5.203	5.499	8.345
AT1G73500	2.83525	5.42025	1.91174	Up	MAP KINASE KINASE 9 (MKK9)	member of MAP Kinase Kinase family. Autophosphorylates and also phosphorylates MPK3 and MPK6. Independently involved in ethylene and calmalexin biosynthesis. Induces transcription of ACS2, ACS6, ERF1, ERF2, ERF5, ERF6, CYP79B2, CYP79B3, CYP71A13 and PAD3.	0.003338	2.73	2.79	3.298	2.523	5.287	6.496	5.413	4.485
AT5G20390	2.97267	0.2781	0.0935521	Down		Glycosyl hydrolase superfamily protein;(source:Araport11)	0.003346	1.271	0.2636	9.682	0.6741	0.5307	0.1056	0.1129	0.3632
AT3G52460	13.4597	4.2935	0.318988	Down		hydroxyproline-rich glycoprotein family protein;(source:Araport11)	0.003346	10.65	9.6	25.8	7.789	7.794	3.936	2.654	2.79
AT1G04670	14.0137	6.756	0.482098	Down		hypothetical protein;(source:Araport11)	0.003346	9.025	17.82	14.5	14.71	8.249	7.36	6.069	5.346
AT4G20940	19.8275	29.885	1.50725	Up	GUARD CELL HYDROGEN PEROXIDE-RESISTANT 1 (GHR1)	Encodes a plasma-membrane localized LRR receptor-like protein involved in both ABA and H202 mediated signaling involved in stomatal movement. TAIR10 annotation for this gene has a low confidence score (2-star). See Comments field for structural annotation by the community.	0.003346	20.85	22.1	16.79	19.57	28.34	25.65	29.37	36.18
AT5G09910	1.4705	0.4424	0.30085	Down		Ras-related small GTP-binding family protein;(source:Araport11)	0.003366	1.538	1.622	1.514	1.208	0.5439	0.6825	0.4804	0.0628
AT5G49340	2.77975	1.2178	0.438097	Down	TRICHOME BIREFRINGENCE-LIKE 4 (TBL4)	Encodes a member of the TBL (TRICHOME BIREFRINGENCE-LIKE) gene family containing a plant-specific DUF231 (domain of unknown function) domain. TBL gene family has 46 members, two of which (TBR/AT5G06700 and TBL3/AT5G01360) have been shown to be involved in the synthesis and deposition of secondary wall cellulose, presumably by influencing the esterification state of pectic polymers. A nomenclature…	0.003435	3.353	2.444	2.451	2.871	1.143	1.077	1.667	0.9842
AT2G47990	14.0825	22.3975	1.59045	Up	SLOW WALKER1 (SWA1)	Encodes a transducin family nucleolar protein with six WD40 repeats that is most likely involved in 18S rRNA biogenesis. The slow progression of the gametophytic division cycles in swa1 suggested that the SWA1 protein is required for the normal progression of mitotic division cycles through the regulation of cell metabolism. Ubiquitously expressed throughout the plant.	0.003448	13.89	17	13.73	11.71	25.64	22.14	22.81	19
AT5G15750	27.97	44.51	1.59135	Up		Alpha-L RNA-binding motif/Ribosomal protein S4 family protein;(source:Araport11)	0.003448	28.94	30.35	27.6	24.99	43.52	51.84	48.42	34.26
AT3G46900	4.64025	1.67475	0.360918	Down	COPPER TRANSPORTER 2 (COPT2)	encodes a member of copper transporter family and functionally complements a high affinity copper transporter mutant in yeast	0.003449	3.861	2.77	5.054	6.876	2.182	1.16	1.739	1.618
AT5G15950	79.8075	47.2675	0.592269	Down	S-ADENOSYLMETHIONINE DECARBOXYLASE 2 (SAMDC2)	Adenosylmethionine decarboxylase family protein;(source:Araport11)	0.00345	76.97	77.44	90.45	74.37	53.76	48.62	53.76	32.93
AT5G15948	80.67	47.7875	0.592383	Down			0.00345	77.81	78.3	91.4	75.17	54.35	49.14	54.36	33.3
AT4G08093	0.11826	0.5365	4.53661	Up		pseudogene of dihydroorotate dehydrogenase;(source:Araport11)	0.003465	0.09449	0.1327	0.23	0.01585	0.516	0.7808	0.5332	0.316
AT5G26570	14.8	23.3125	1.57517	Up	PHOSPHOGLUCAN WATER DIKINASE (PWD)	chloroplastidic phosphoglucan, water dikinase (PWD) which is required for normal degradation of leaf starch in Arabidopsis. NMR analysis of the mutants, suggests that the gene is specifically involved in the phosphorylation of the glucosyl residues of starch at the C3 position.	0.003484	16.32	17.61	11.97	13.3	21.5	19.17	22.19	30.39
AT3G08790	19.51	9.79525	0.502063	Down	TOM1-LIKE 8 (TOL8)	Encodes a member of the Arabidopsis TOL (TOM1-LIKE) family of ubiquitin binding proteins that acts redundantly in the recognition and further endocytic sorting of a PIN-FORMED (PIN)-type auxin carrier protein at the plasma membrane, modulating dynamic auxin distribution and associated growth responses.	0.003484	13.42	18.76	30.16	15.7	11.71	8.069	9.849	9.553
AT1G73630	8.21675	3.11175	0.378708	Down		EF hand calcium-binding protein family;(source:Araport11)	0.003486	9.242	8.564	8.552	6.509	4.335	4.53	2.297	1.285
AT3G51300	20.5775	12.107	0.588361	Down	RHO-RELATED PROTEIN FROM PLANTS 1 (ROP1)	Encodes a pollen-specific Rop GTPase, member of the Rho family of small GTP binding proteins that interacts with RIC3 and RIC4 to control tip growth in pollen tubes. These three proteins promote the proper targeting of exocytic vesicles in the pollen tube tip. ROP1 activity is regulated by the REN1 GTPase activator protein.	0.003559	19.63	22.12	20.11	20.45	14.98	12.08	12.33	9.038
AT5G11240	18.29	27.88	1.52433	Up	NUCLEAR GLUCOSE-RESPONSIVE WD40 PROTEIN1 (NUGWD1)	GHS40 encodes a WD40 protein, that is localized in the nucleus and nucleolus. In the presence of high glucose it negatively regulates the expression of abscisic acid degradation and signaling genes.	0.003638	19.16	20.99	13.61	19.4	25.34	28.49	25.58	32.11
AT1G20070	19.655	8.3255	0.423582	Down		hypothetical protein;(source:Araport11)	0.003638	15.73	18.78	27.18	16.93	12.93	9.606	6.994	3.772
AT5G64420	20.665	31.67	1.53254	Up		DNA polymerase V family;(source:Araport11)	0.003651	23.23	22.94	16.13	20.36	29.08	28.14	28.9	40.56
AT2G03060	20.29	11.8887	0.585941	Down	AGAMOUS-LIKE 30 (AGL30)	Encodes a member of the MIKC (MADS box, Keratin binding domain, and C terminal domain containing )family of transcriptional regulators. AGL30 is expressed in pollen.It forms heterodimers with other MICK family members.	0.003651	21.42	22.08	22.59	15.07	12.33	13.61	12.3	9.315
ATCG00300	75.1525	155.75	2.07245	Up	(YCF9)	encodes PsbZ, which is a subunit of photosystem II. In Chlamydomonas, this protein has been shown to be essential in the interaction between PS II and the light harvesting complex II.	0.003659	75.04	90.05	64.64	70.88	117.3	104.1	113.6	288
AT5G61710	0.442503	0.0217075	0.0490562	Down		cotton fiber protein;(source:Araport11)	0.003659	0.9105	0.1536	0.6771	0.02881	0.07407	0	0.01276	0
AT4G16008	30.885	13.5667	0.439267	Down		hypothetical protein;(source:Araport11)	0.003659	26.56	25.36	50.41	21.21	17.59	14.43	14.35	7.897
AT1G19780	0.626525	0.193303	0.308531	Down	CYCLIC NUCLEOTIDE GATED CHANNEL 8 (CNGC8)	Encodes a member of the cyclic nucleotide gated channel (CNGC) family that is essential for male reproductive fertility.	0.003659	0.3785	0.8498	0.6226	0.6552	0.2983	0.1632	0.2175	0.09421
AT5G17830	3.7015	1.818	0.491152	Down		Plasma-membrane choline transporter family protein;(source:Araport11)	0.003659	3.927	3.243	4.385	3.251	1.715	1.872	2.118	1.567
AT5G07170	2.57675	0.767425	0.297827	Down	(TPXL4)	TPX2-LIKE Group A family with aurora binding andTPX2 domains. Activator of Aurora kinase activity.	0.003659	2.176	2.292	4.823	1.016	1.015	0.736	0.7994	0.5193
AT3G22040	1.16273	0.125457	0.1079	Down		cysteine-rich repeat secretory-like protein (DUF26);(source:Araport11)	0.003659	0.2139	1.161	1.632	1.644	0.3586	0.13	0.01323	0
AT5G57200	10.6017	4.574	0.431438	Down	(PICALM2A)	ENTH/ANTH/VHS superfamily protein;(source:Araport11)	0.003687	6.293	10.02	16.54	9.554	6.516	3.956	4.834	2.99
AT3G22133	0.74095	0.1686	0.227546	Down		transposable_element_gene;(source:Araport11);pseudogene, hypothetical protein, similar to putative non-LTR retroelement reverse transcriptase GB:AAC33226.1 from (Arabidopsis thaliana);(source:TAIR10)	0.003703	0.4316	1.084	0.7003	0.7479	0.2481	0.2447	0.1816	0
AT5G63070	2.14725	0.65605	0.30553	Down		Ribosomal protein S19 family protein;(source:Araport11)	0.003703	2.142	3.21	1.225	2.012	0.2873	0.9024	0.6998	0.7347
AT1G26800	0.413325	1.04953	2.53922	Up	MISFOLDED PROTEIN SENSING RING E3 LIGASE 1 (MPSR1)	MPSR1 is cytoplasmic E3 ligase that senses misfolded proteins independently of chaperones and targets those proteins for degradation via the 26S proteasome. Involved in the regulation of the homeostasis of sensor NLR immune receptors.	0.003703	0.5608	0.3581	0.377	0.3574	0.8542	1.172	1.191	0.9809
AT2G18420	22.9325	11.7955	0.514357	Down		Encodes a Gibberellin-regulated GASA/GAST/Snakin family protein	0.003716	24.39	20.15	24.34	22.85	9.684	16.08	13.63	7.788
AT2G31985	6.505	2.641	0.405995	Down		lipoprotein (DUF1264);(source:Araport11)	0.003716	4.108	7.236	7.302	7.374	3.957	1.927	2.9	1.78
AT1G51410	5.13125	1.56687	0.305359	Down		similar to Eucalyptus gunnii alcohol dehydrogenase of unknown physiological function (GI:1143445), apple tree, PIR:T16995; NOT a cinnamyl-alcohol dehydrogenase	0.003721	4.5	5.891	6.278	3.856	3.304	1.2	1.183	0.5805
AT1G80440	7.151	16.8792	2.3604	Up	KISS ME DEADLY 1 (KMD1)	Encodes a member of a family of F-box proteins, called the KISS ME DEADLY (KMD) family, that targets type-B ARR proteins for degradation and is involved in the negative regulation of the cytokinin response. Also named as KFB20, a member of a group of Kelch repeat F-box proteins that negatively regulate phenylpropanoid biosynthesis by targeting the phenypropanoid biosynthesis enzyme phenylalanine …	0.003759	11.1	5.406	6.615	5.483	8.527	12.42	16.46	30.11
AT1G06990	32.87	19.155	0.58275	Down		GDSL-motif esterase/acyltransferase/lipase. Enzyme group with broad substrate specificity that may catalyze acyltransfer or hydrolase reactions with lipid and non-lipid substrates.	0.003785	29.57	32.45	36.92	32.54	20.97	19.68	22.44	13.53
AT4G33465	45.75	20.0325	0.437869	Down	SCR-LIKE 22 (SCRL22)	Encodes a member of a family of small, secreted, cysteine rich proteins with sequence similarity to SCR (S locus cysteine-rich protein).	0.003785	27.03	46.33	63.91	45.73	26.5	23.14	18.66	11.83
AT2G22941	2.916	0.719225	0.246648	Down		Encodes a defensin-like (DEFL) family protein.	0.003785	2.272	3.184	2.119	4.089	1.115	0.6733	0.9461	0.1425
AT3G52170	8.20475	12.8275	1.56342	Up		DNA binding protein;(source:Araport11)	0.003791	8.456	9.093	7.25	8.02	11.58	11.6	12.08	16.05
ATMG00970	0.422375	1.999	4.73276	Up	(ORF117)	hypothetical protein;(source:Araport11)	0.003791	0.4287	0.4977	0.6324	0.1307	1.344	1.137	1.505	4.01
AT2G16018	2.16525	0.725875	0.335238	Down		hypothetical protein;(source:Araport11)	0.003794	1.34	2.176	2.428	2.717	0.9431	0.9163	0.7568	0.2873
AT1G20320	0.51465	0.115425	0.224279	Down		Haloacid dehalogenase-like hydrolase (HAD) superfamily protein;(source:Araport11)	0.003816	0.6898	0.3177	0.4063	0.6448	0.1625	0.1649	0.1343	0
AT4G02380	25.95	5.6892	0.219237	Down	SENESCENCE-ASSOCIATED GENE 21 (SAG21)	Encodes AtLEA5 (late embryogenesis abundant like protein). Also known as SENESCENCE-ASSOCIATED GENE 21 (SAG21). Has a role on oxidative stress tolerance. mRNA levels are elevated in response to various stresses.	0.003816	27.41	16.35	47.69	12.35	10.77	8.221	2.856	0.9098
AT1G56220	450.7	780.15	1.73097	Up		Dormancy/auxin associated family protein;(source:Araport11)	0.003842	584.1	403.9	419.5	395.3	596.9	669.9	729.8	1124
AT4G34440	4.74425	1.81628	0.382837	Down	PROLINE-RICH EXTENSIN-LIKE RECEPTOR KINASE 5 (PERK5)	Encodes a member of the proline-rich extensin-like receptor kinase (PERK) family. This family consists of 15 predicted receptor kinases (PMID: 15653807).	0.003842	4.585	4.807	5.087	4.498	3.196	1.778	1.664	0.6271
AT4G37409	10.3645	4.6725	0.450818	Down		hypothetical protein;(source:Araport11)	0.003842	7.488	10.12	13.16	10.69	7.669	3.397	4.286	3.338
AT5G15910	20.8925	12.2225	0.585019	Down		NAD(P)-binding Rossmann-fold superfamily protein;(source:Araport11)	0.003842	22.09	19.78	14.78	26.92	11.59	14.81	10.88	11.61
AT3G24780	0.523875	1.2216	2.33185	Up		Uncharacterized conserved protein UCP015417, vWA;(source:Araport11)	0.003843	0.5069	0.5655	0.5281	0.495	0.8944	1.092	1.167	1.733
AT1G77550	13.8925	21.6625	1.55929	Up		tubulin-tyrosine ligase;(source:Araport11)	0.003859	14.62	16.2	10.05	14.7	19.11	19.73	20.89	26.92
AT4G00070	1.49425	0.4823	0.322771	Down	(CTL12)	RING/U-box superfamily protein;(source:Araport11)	0.003859	1.887	1.27	1.537	1.283	0.5497	0.6817	0.4354	0.2624
AT1G23240	58.355	35.4925	0.608217	Down		Caleosin-related family protein	0.003869	49.24	70.77	61.01	52.4	40.17	30.11	33.49	38.2
AT3G50280	9.2505	5.20475	0.562645	Down		HXXXD-type acyl-transferase family protein;(source:Araport11)	0.003895	9.647	10.19	7.719	9.446	6.186	5.445	5.106	4.082
AT2G41970	3.22475	1.46775	0.455152	Down	MARIS (MRI)	Encodes MRI, a plasma membrane-localized member of the RLCK-VIII subfamily. Preferentially expressed in both pollen tubes and root hairs. mri-knockout mutants display spontaneous pollen tube and root-hair bursting.	0.003898	2.977	3.338	3.966	2.618	1.878	1.279	1.22	1.494
ATCG00070	50.47	147.485	2.92223	Up	PHOTOSYSTEM II REACTION CENTER PROTEIN K PRECURSOR (PSBK)	PSII K protein	0.00392	34.04	56.84	62.24	48.76	91.66	70.66	88.82	338.8
AT5G16500	3.022	0.935475	0.309555	Down	LOST IN POLLEN TUBE GUIDANCE 1 (LIP1)	Encodes a receptor-like cytoplasmic kinase localized in the membrane of pollen tube tip regions that controls micropylar pollen tube guidance in Arabidopsis.	0.003921	3.154	3.425	4.151	1.358	1.713	1.055	0.5241	0.4498
AT3G44070	25.425	8.9795	0.353176	Down		Glycosyl hydrolase family 35 protein;(source:Araport11)	0.003935	14.38	18.98	45.82	22.52	16.06	8.271	6.335	5.252
AT1G07645	3.77	1.42375	0.377653	Down	DESICCATION-INDUCED 1VOC SUPERFAMILY PROTEIN (DSI-1VOC)	Ortholog of HC205/ Xhdsi-1voc from Xerophyta humilis. Member of VOC metalloenzyme superfamily. Not involved in response to abiotic stress, unlike its Xerophyta ortholog.	0.003968	2.649	3.58	4.631	4.22	1.649	1.019	1.835	1.192
AT2G20562	23.0675	8.51625	0.369188	Down	TAXIMIN 2 (TAX2)	Encodes a putative signalling peptide with similarity to TAX1. No known function has been demonstrated yet.	0.003987	17.01	16.69	36.75	21.82	10.54	11.55	8.844	3.131
AT3G12660	10.2607	3.24425	0.316181	Down	FASCICLIN-LIKE ARABINOGALACTAN PROTEIN 14 PRECURSOR (FLA14)	fasciclin-like arabinogalactan-protein, family (FLA14). Possibly involved in embryogenesis and seed development.	0.003987	5.569	8.924	15.89	10.66	6.583	1.746	2.107	2.541
AT1G67865	73.285	39.04	0.532715	Down		hypothetical protein;(source:Araport11)	0.003988	76.72	80.95	48.33	87.14	43.23	54.51	31.55	26.87
AT1G69200	12.1088	19.3775	1.60029	Up	FRUCTOKINASE-LIKE 2 (FLN2)	Encodes a fructokinase-like protein (AT3G54090/FLN1, AT1G69200/FLN2), a member of the pfkB-carbohydrate kinase family. FLN1 and FLN2 are potential plastidial thioredoxin z (TRX z) targets. Mutants display mutant chloroplast development, general plant growth and development defects and defects in PEP-dependent transcription. The mRNA is cell-to-cell mobile.	0.00399	14.18	13.01	8.335	12.91	16.52	18.28	18.19	24.52
AT3G22053	2.46787	0.68325	0.276858	Down		cysteine-rich repeat secretory protein;(source:Araport11)	0.003999	0.9985	3.123	3.118	2.632	1.201	0.5448	0.6203	0.3669
AT5G46795	28.515	16.8475	0.590829	Down	MICROSPORE-SPECIFIC PROMOTER 2 (MSP2)	microspore-specific promoter 2;(source:Araport11)	0.004003	25.96	29.18	22.96	35.96	17.24	13.96	18.16	18.03
AT3G23620	9.97875	16.5575	1.65928	Up	ARABIDOPSIS HOMOLOG OF YEAST RPF2 (ARPF2)	BRIX domain containing protein, similar to RNA biogenesis factors in yeast. Binds rRNA and likely also functions in RNA biogenesis in Arabidopsis. Essential gene, mutants are embryo lethal and does not transmit well through the gametophyte.	0.004018	10.14	12.91	6.515	10.35	13.91	16.69	15.39	20.24
AT2G16535	4.3215	0.876775	0.202887	Down	POLLEN COAT PROTEIN B CLASS GAMMA (PCP-BGAMMA)	Encodes a Maternally expressed gene (MEG) family protein	0.004039	3.285	4.043	6.853	3.105	1.802	1.306	0.3991	0
AT2G04675	6.96675	2.3645	0.339398	Down		hypothetical protein;(source:Araport11)	0.004047	3.274	7.362	5.871	11.36	3.499	1.972	1.828	2.159
AT5G03720	9.12575	14.2575	1.56234	Up	HEAT SHOCK TRANSCRIPTION FACTOR A3 (HSFA3)	Member of Heat Stress Transcription Factor (Hsf) family. Expression is regulated by DREB2A and in turn HSFA3 regulates the expression of hsps Hsp18.1-CI and Hsp26.5-MII35S. Involved in establishing thermotolerence.	0.004069	9.174	10.21	8.59	8.529	13.96	15.49	15.23	12.35
AT2G40360	37.31	58.9125	1.579	Up	ARABIDOPSIS THALIANA PESCADILLO ORTHOLOG1 (ATPEP1)	Encodes BOP1, an ortholog of Block of cell proliferation (BOP) protein. A T-DNA null allele of the BOP1 gene is lethal, and a 50% decrease in transcript accumulation is sufficient to cause severe developmental defects linked to defective cell division.	0.004069	39.02	40.19	30.21	39.82	46.62	55.77	52.12	81.14
AT4G29460	0.65675	0.07614	0.115935	Down	PHOSPHOLIPASE A2 GAMMA (PLA2-GAMMA)	Encodes one of the four Arabidopsis phospholipase PLA2 parologs: AT2G06925 (PLA2-ALPHA), AT2G19690 (PLA2-BETA), AT4G29460 (PLA2-GAMMA) and AT4G29470 (PLA2-DELTA). Involved in pollen development and germination and tube growth.	0.004069	0.5982	0.4631	0.7144	0.8513	0.2605	0.04406	0	0
AT2G31060	20.59	31.03	1.50704	Up	EMBRYO DEFECTIVE 2785 (EMB2785)	elongation factor family protein;(source:Araport11)	0.004085	23.66	23.63	15.72	19.35	27.19	30.55	30.04	36.34
AT4G21010	3.412	1.20903	0.354345	Down		Transcription initiation factor TFIIE, beta subunit;(source:Araport11)	0.004085	3.453	3.22	3.258	3.717	1.015	2.108	1.3	0.4131
AT4G03813	0.21505	0.582025	2.70646	Up		transposable_element_gene;(source:Araport11);non-LTR retrotransposon family (LINE), has a 3.1e-16 P-value blast match to GB:NP_038603 L1 repeat, Tf subfamily, member 23 (LINE-element) (Mus musculus);(source:TAIR10)	0.004085	0.1839	0.3162	0.2296	0.1305	0.5795	0.4814	0.6303	0.6369
AT1G24540	0.38775	0.09681	0.249671	Down	CYTOCHROME P450, FAMILY 86, SUBFAMILY C, POLYPEPTIDE 1 (CYP86C1)	member of CYP86C	0.004091	0.38	0.3587	0.5075	0.3048	0.1662	0.1205	0.0368	0.06374
AT2G17040	0.3478	1.07177	3.08158	Up	NAC DOMAIN CONTAINING PROTEIN 36 (NAC036)	Member of the NAC transcription factor family and more specifically, the ONAC022 subfamily. Involved in leaf and inflorescence stem morphogenesis. The mRNA is cell-to-cell mobile.	0.004129	0.4078	0.3053	0.2771	0.401	0.6467	1.401	0.7204	1.519
AT3G51490	14.955	8.91625	0.596205	Down	TONOPLAST MONOSACCHARIDE TRANSPORTER3 (TMT3)	tonoplast monosaccharide transporter3;(source:Araport11)	0.004168	12.12	17.3	14.78	15.62	10.34	6.636	9.484	9.205
AT5G14345	11.6155	4.94675	0.425875	Down	EARLY NODULIN-LIKE PROTEIN 21 (ENODL21)	Encodes a Uclacyanin/Basic blue family protein	0.004168	12.03	12.27	9.382	12.78	5.296	4.057	7.436	2.998
AT2G17710	11.919	6.28225	0.527079	Down		Big1;(source:Araport11)	0.004211	9.056	12.65	11.39	14.58	7.725	5.852	4.969	6.583
AT1G23580	9.007	5.011	0.556345	Down		transmembrane protein, putative (Domain of unknown function DUF220);(source:Araport11)	0.004211	8.608	10.13	7.595	9.695	4.679	5.298	5.49	4.577
AT5G17320	0.11706	0.0143975	0.122992	Down	HOMEODOMAIN GLABROUS 9 (HDG9)	Encodes a homeobox-leucine zipper family protein belonging to the HD-ZIP IV family.	0.004249	0.1341	0.106	0.08884	0.1393	0.01836	0.01552	0.02371	0
AT2G27180	2.56725	0.682325	0.265781	Down		hypothetical protein;(source:Araport11)	0.00425	3.852	1.59	3.378	1.449	1.242	0.7119	0.5871	0.1883
AT3G03900	32.6175	19.235	0.589714	Down	ADENOSINE-5'-PHOSPHOSULFATE (APS) KINASE 3 (APK3)	Provides activated sulfate for the sulfation of secondary metabolites, including the glucosinolates. Redundant with APK4.	0.004312	31.33	36.08	22.95	40.11	20.9	20.48	16.94	18.62
AT1G23510	14.45	8.34825	0.577734	Down		OBP32pep protein;(source:Araport11)	0.00432	14.81	16.81	12.43	13.75	8.372	8.091	10	6.93
AT2G07698	1.785	4.2355	2.37283	Up		ATPase, F1 complex, alpha subunit protein;(source:Araport11)	0.004321	1.715	2.132	1.198	2.095	3.214	2.539	3.128	8.061
AT1G64220	21.33	38.745	1.81646	Up	TRANSLOCASE OF OUTER MEMBRANE 7 KDA SUBUNIT 2 (TOM7-2)	translocase of outer membrane 7 kDa subunit 2;(source:Araport11)	0.004336	20.1	20.25	23.71	21.26	36.77	45.28	42.15	30.78
AT3G07110	368.9	574	1.55598	Up		Ribosomal protein L13 family protein;(source:Araport11)	0.004389	414.2	383.8	328.9	348.7	610.8	631.8	621.7	431.7
AT3G47450	11.655	17.995	1.54397	Up	NO ASSOCIATED 1 (NOA1)	Encodes a protein with similarity to the bacterial YqeH GTPase required for proper ribosome assembly. Mutant analyses show that this protein regulates growth and hormonal signaling and attenuates oxidative stress and reactive oxygen species (ROS). It also seems to be involved in regulating leaf senescence, cell death, nitric oxide biosynthesis in response to ABA but not exogenous H2O2. This prote…	0.00439	12.84	12.08	12.13	9.57	17.33	16.1	18.17	20.38
AT4G10060	8.46475	13.5075	1.59574	Up	GLCCER-DEGRADING ENZYME (GLUCOSYLCERAMIDASE) 3 (GCD3)	Glucosylceramidase that preferentially hydrolyzes long acyl chain glucosylceramides.	0.004391	10.41	9.403	6.364	7.682	12.65	11.56	12.57	17.25
AT2G18520	11.0775	16.895	1.52516	Up		Tetratricopeptide repeat (TPR)-like superfamily protein;(source:Araport11)	0.004391	10.9	10.85	10.8	11.76	15.4	16.76	18.8	16.62
AT1G61566	1753.5	619.925	0.353536	Down	RALF-LIKE 9 (RALFL9)	Member of a diversely expressed predicted peptide family showing sequence similarity to tobacco Rapid Alkalinization Factor (RALF), and is believed to play an essential role in the physiology of Arabidopsis. Consists of a single exon and is characterized by a conserved C-terminal motif and N-terminal signal peptide.	0.004391	1181	1438	2937	1458	1138	568.8	536.6	236.3
AT3G15510	23.205	14.385	0.61991	Down	NAC DOMAIN CONTAINING PROTEIN 2 (NAC2)	Note of caution: not to be confused with another protein (AtNAC6 locus AT5G39610) which on occasion has also been referred to as AtNAC2.	0.00444	24.21	28.54	17.97	22.1	15.3	13.99	15.75	12.5
AT5G57990	35.315	57.6675	1.63295	Up	UBIQUITIN-SPECIFIC PROTEASE 23 (UBP23)	Encodes a ubiquitin-specific protease.	0.004441	34.35	41.2	28.95	36.76	48.68	47.3	50.39	84.3
AT1G73810	0.5461	0.173375	0.317478	Down		Core-2/I-branching beta-1,6-N-acetylglucosaminyltransferase family protein;(source:Araport11)	0.004451	0.4567	0.5468	0.6065	0.5744	0.2051	0.1156	0.226	0.1468
AT3G62640	12.63	3.23975	0.256512	Down		DUF3511 domain protein (DUF3511);(source:Araport11)	0.004453	10.93	8.925	23.52	7.145	6.544	3.89	1.423	1.102
AT4G11760	317.325	118.075	0.372095	Down	LOW-MOLECULAR-WEIGHT CYSTEINE-RICH 17 (LCR17)	Encodes a member of a family of small,secreted, cysteine rich protein with sequence similarity to the PCP (pollen coat protein) gene family.	0.004453	205.3	296.5	478.4	289.1	229.3	107.6	84.32	51.08
AT4G20050	68.4625	43.4175	0.634179	Down	QUARTET 3 (QRT3)	Encodes a polygalacturonase that plays a direct role in degrading the pollen mother cell wall during microspore development.	0.004464	58.78	87.58	64.3	63.19	48.03	42.41	44.04	39.19
AT1G22170	22.4725	14.2225	0.632885	Down		Phosphoglycerate mutase family protein;(source:Araport11)	0.004469	22.05	23.06	17.81	26.97	14.39	15.24	14.32	12.94
AT3G42960	14.1365	7.3595	0.520603	Down	TAPETUM 1 (ATA1)	Arabidopsis homolog of TASSELSEED2. Expressed specifically in tapetal cells.	0.004472	16.5	14.94	9.886	15.22	5.403	9.817	5.467	8.751
AT1G75290	7.303	3.43525	0.470389	Down		encodes a protein whose sequence is similar to an isoflavone reductase	0.004541	5.492	7.548	9.257	6.915	4.599	3.293	3.254	2.595
AT3G57370	7.012	3.73475	0.532623	Down	(BRP4)	Encodes a nuclear-localized member of the TFIIB-related protein family that is involved in regulation of the mitotic cell-cycle progression during male gametogenesis.	0.004574	6.962	7.439	6.47	7.177	3.892	4.595	3.462	2.99
AT4G23180	11.78	21.3	1.80815	Up	CYSTEINE-RICH RLK (RECEPTOR-LIKE PROTEIN KINASE) 10 (CRK10)	Encodes a receptor-like protein kinase. Naming convention from Chen et al 2003 (PMID 14756307) The mRNA is cell-to-cell mobile.	0.004585	12.97	11.7	12.03	10.42	13.52	24.21	16.33	31.14
AT4G32714	6.759	2.20025	0.325529	Down	SCR-LIKE 25 (SCRL25)	Encodes a member of a family of small, secreted, cysteine rich proteins with sequence similarity to SCR (S locus cysteine-rich protein).	0.004682	4.285	6.007	10.96	5.784	3.154	2.286	2.017	1.344
AT5G21160	31.285	49.6	1.58542	Up	LA RELATED PROTEIN 1A (LARP1A)	Encodes a protein with sequence similarity to mRNA binding proteins from humans. LARP1a is involved in mRNA degradation in response to heat stress. Upon heat stress LARP1a interacts with XRN4 and appears to be responsible for addressing XRN4 to the polysome. LARP1/XRN4 double mutants are impaired in thermotolerance and lower levels of heat induced RNA turnover.	0.004695	32.02	34.17	29.63	29.32	43.12	39.96	45.89	69.43
AT2G30766	1.14165	0.139625	0.122301	Down	FE-UPTAKE-INDUCING PEPTIDE1 (FEP1)	Functions in iron homeostasis, activates iron deficiency response genes such as bHLH38, bHLH39, IRT1, and FRO2.	0.004705	0.572	1.16	2.496	0.3386	0.1451	0.1636	0.2498	0
AT5G58310	53.9825	33.9075	0.62812	Down	METHYL ESTERASE 18 (MES18)	Encodes a protein shown to have methyl IAA esterase activity in vitro. This protein does not act on methyl JA, MeSA, MeGA4, or MEGA9 in vitro.	0.004728	55.18	57.37	44.15	59.23	39.57	34.23	34.26	27.57
AT1G72440	12.214	23.645	1.93589	Up	EMBRYO SAC DEVELOPMENT ARREST 25 (EDA25)	Encodes SLOW WALKER2 (SWA2), a NOC1/Mak21 homologue. Essential for coordinated cell cycle progression during female gametophyte development.	0.004732	12.22	13.59	8.676	14.37	16.79	18.08	17.99	41.72
AT1G09620	49.605	76.29	1.53795	Up		ATP binding/leucine-tRNA ligases/aminoacyl-tRNA ligase;(source:Araport11)	0.004733	51.16	55.72	41.07	50.47	67.06	64.92	73.5	99.68
AT5G12960	2.20322	0.471475	0.213993	Down		proline-tRNA ligase (DUF1680);(source:Araport11)	0.004733	2.264	0.9616	5.017	0.5703	0.9424	0.3188	0.3498	0.2749
AT2G21450	0.921425	1.9575	2.12443	Up	CHROMATIN REMODELING 34 (CHR34)	chromatin remodeling 34;(source:Araport11)	0.004742	0.8194	0.8677	0.8416	1.157	1.438	1.639	1.898	2.855
AT5G51540	5.67025	9.26275	1.63357	Up	(ATOCT1)	Mitochondrial ATP-independent protease	0.004753	6.976	6.401	3.373	5.931	8.7	9.283	9.151	9.917
AT3G50820	152.15	225.575	1.48258	Up	PHOTOSYSTEM II SUBUNIT O-2 (PSBO2)	Encodes a protein which is an extrinsic subunit of photosystem II and which has been proposed to play a central role in stabilization of the catalytic manganese cluster. In Arabidopsis thaliana the PsbO proteins are encoded by two genes: psbO1 and psbO2. PsbO2 is the minor isoform in the wild-type. Mutants defective in this gene have been shown to be affected in the dephosphorylation of the D1 pr…	0.004783	165.6	154.7	147.4	140.9	238.8	212.4	246.4	204.7
AT1G48780	12.4025	7.0975	0.572264	Down		hypothetical protein;(source:Araport11)	0.004799	13.61	12.45	11.25	12.3	7.421	6.919	7.479	6.571
ATCG01090	5.80225	18.3175	3.15696	Up	(NDHI)	Encodes subunit of the chloroplast NAD(P)H dehydrogenase complex	0.004799	6.326	8.827	5.515	2.541	11	11.05	10.81	40.41
AT3G20865	1471.1	489.65	0.332846	Down	ARABINOGALACTAN PROTEIN 40 (AGP40)	Encodes a putative arabinogalactan-protein (AGP40) that is expressed in pollen.	0.004863	815.4	1123	2741	1205	955.9	394.2	385.8	222.7
AT3G63300	7.98675	12.8225	1.60547	Up	FORKED 1 (FKD1)	Encodes a pleckstrin homology domain- and DUF828-containing protein. Mutants have defects in leaf vascular pattering, with vascular bundles that fail to meet distally in both the cotyledons and leaves. Necessary to the formation of the closed leaf vascular pattern characteristic of dicot leaves in response to auxin. Redundant with FKD2. FKD1 may influence PIN1 localization in an auxin dependent m…	0.004863	7.189	7.88	7.88	8.998	11.59	11.1	12.08	16.52
AT5G27640	45.44	69.66	1.53301	Up	TRANSLATION INITIATION FACTOR 3B1 (TIF3B1)	encodes a member of eukaryotic translation initiation factor 3B family.	0.004863	49.79	53.18	34.45	44.34	60.39	61.92	66.53	89.8
AT1G16410	2.828	7.74325	2.73807	Up	CYTOCHROME P450 79F1 (CYP79F1)	member of CYP79F The mRNA is cell-to-cell mobile.	0.004863	1.003	2.11	3.114	5.085	11.1	7.681	6.622	5.57
AT3G23450	7.057	4.1305	0.585305	Down	(KRATOS)	Kratos restricts cell death during differentiation of tracheary elements.	0.004932	7.58	6.958	6.105	7.585	3.83	5.01	3.509	4.173
AT1G29440	4.54675	1.87075	0.411448	Down	SMALL AUXIN UP RNA 63 (SAUR63)	SAUR-like auxin-responsive protein family;(source:Araport11)	0.004947	4.079	4.829	5.897	3.382	1.943	2.116	2.127	1.297
AT3G14930	35.3825	52.36	1.47983	Up	(HEME1)	Uroporphyrinogen decarboxylase;(source:Araport11)	0.004973	39.59	36.61	33.15	32.18	47.53	48.45	50.95	62.51
AT4G28940	1.10173	0.35845	0.325353	Down		Phosphorylase superfamily protein;(source:Araport11)	0.005054	0.8596	1.057	1.636	0.8543	0.5185	0.4127	0.3388	0.1638
AT5G01760	24.3325	11.9002	0.489068	Down	TOM1-LIKE 7 (TOL7)	Encodes a member of the Arabidopsis TOL (TOM1-LIKE) family of ubiquitin binding proteins that acts redundantly in the recognition and further endocytic sorting of a PIN-FORMED (PIN)-type auxin carrier protein at the plasma membrane, modulating dynamic auxin distribution and associated growth responses.	0.005093	15.28	28.26	31.03	22.76	17.54	9.026	12.5	8.535
AT2G33000	3.2015	1.633	0.510073	Down		ubiquitin-associated (UBA)/TS-N domain-containing protein-like protein;(source:Araport11)	0.005093	3.901	3.553	2.576	2.776	1.575	1.434	1.69	1.833
AT2G46860	76.6575	31.2625	0.407821	Down	PYROPHOSPHORYLASE 3 (PPa3)	Encodes a protein that might have inorganic pyrophosphatase activity.	0.005102	61.76	86.1	102.2	56.57	51.9	31.76	29.78	11.61
AT1G75790	88.345	56.5025	0.639566	Down	SKU5 SIMILAR 18 (sks18)	SKU5 similar 18;(source:Araport11)	0.005159	88.82	85.13	103	76.43	53.36	50.41	63.01	59.23
AT3G13227	17.24	6.26325	0.363298	Down		serine-rich protein-like protein;(source:Araport11)	0.005166	16.72	15.05	22.29	14.9	12.33	5.633	4.322	2.768
AT1G25550	4.43725	8.11925	1.82979	Up	HRS1 HOMOLOG3 (HHO3)	Member of HHO/HRS GARP type transcriptional repressor family. Involved in Pi uptake and Pi starvation signaling. Transcriptional repressors that functions with other NIGT genes as an important hub in the nutrient signaling network associated with the acquisition and use of nitrogen and phosphorus.	0.005166	6.238	3.914	3.449	4.148	6.132	7.568	8.187	10.59
AT2G24440	8.36525	4.025	0.481157	Down		selenium binding protein;(source:Araport11)	0.005166	9.551	7.025	4.955	11.93	4.017	4.25	3.873	3.96
AT1G04290	33.3	19.47	0.584685	Down		Thioesterase superfamily protein;(source:Araport11)	0.005173	28.06	30.52	36.68	37.94	21.79	21.3	20.84	13.95
AT2G05025	0.67815	0.133977	0.197563	Down		transposable_element_gene;(source:Araport11);pseudogene, hypothetical protein;(source:TAIR10)	0.005173	0.3035	0.8692	0.7995	0.7404	0.3304	0.08941	0.1161	0
AT5G57630	3.63075	6.39825	1.76224	Up	CBL-INTERACTING PROTEIN KINASE 21 (CIPK21)	CBL-interacting protein kinase.When mutated plants are hypersensitive to salt and osmotic stress.	0.005173	4.533	3.962	3.456	2.572	6.071	6.185	7.144	6.193
AT5G49560	6.90175	12.2425	1.77383	Up		Putative methyltransferase family protein;(source:Araport11)	0.005222	9.348	6.258	6.532	5.469	12.93	12.88	11.07	12.09
AT2G04530	21.5025	32.395	1.50657	Up	(CPZ)	Encodes a protein with RNAse Z activity suggesting a role in tRNA processing. Protein contains a signal sequence for import into the chloroplast.	0.00523	24.5	22.95	20.3	18.26	29.06	32.36	33.09	35.07
AT4G29470	5.387	1.73778	0.322587	Down	PHOSPHOLIPASE A2 DELTA (PLA2-DELTA)	Encodes one of the four Arabidopsis phospholipase PLA2 parologs: AT2G06925 (PLA2-ALPHA), AT2G19690 (PLA2-BETA), AT4G29460 (PLA2-GAMMA) and AT4G29470 (PLA2-DELTA). Involved in pollen development and germination and tube growth.	0.005243	5.586	6.567	5.891	3.504	3.365	1.837	0.6821	1.067
AT4G25730	23.535	44.8675	1.90642	Up	TRNA METHYLTRANSFERASE 7B (TRM7B)	FtsJ-like methyltransferase family protein;(source:Araport11)	0.005279	24.45	27.11	14.66	27.92	34.04	33.29	34.91	77.23
AT1G05540	53.51	34.395	0.642777	Down	DUF295 ORGANELLAR A 1 (ATDOA1)	hypothetical protein (DUF295);(source:Araport11)	0.005279	52.94	50.54	51.82	58.74	35.59	39.31	34.46	28.22
AT1G29030	10.0385	15.0125	1.49549	Up		Apoptosis inhibitory protein 5 (API5);(source:Araport11)	0.005279	11.57	11.04	8.277	9.267	13.91	14.61	15.35	16.18
AT4G27440	273.35	418.8	1.5321	Up	PROTOCHLOROPHYLLIDE OXIDOREDUCTASE B (PORB)	light-dependent NADPH:protochlorophyllide oxidoreductase B The mRNA is cell-to-cell mobile.	0.005339	315.3	262.1	281.2	234.8	401.5	397.8	467.3	408.6
AT5G07410	1280.97	556.5	0.434435	Down	PECTIN METHYLESTERASE 48 (PME48)	Encodes a pectin methylesterase implicated in the remodeling of pectins in pollen. Its expression is restricted to the male gametophyte (dry pollen, imbibed pollen and pollen tube). Mutants do not display any phenotype in the vegetative tissues. Pollen germination of KO mutant is strongly delayed in vivo and in vitro. Extra calcium restores the wild type phenotype in vitro.	0.005356	907.9	1275	1719	1222	978.7	473.4	477.6	296.3
AT1G35890	0.261375	0	0	Down		NAC (No Apical Meristem) domain transcriptional regulator superfamily protein;(source:Araport11)	0.005401	0.1337	0.478	0.4338	0	0	0	0	0
AT5G01640	6.32825	2.93125	0.463201	Down	PRENYLATED RAB ACCEPTOR 1.B5 (PRA1.B5)	prenylated RAB acceptor 1.B5;(source:Araport11)	0.005401	6.104	5.079	8.915	5.215	3.292	2.784	2.576	3.073
AT3G18570	16.4697	6.18975	0.375825	Down		Oleosin family protein;(source:Araport11)	0.005413	8.569	17.41	26.52	13.38	10.51	4.668	5.923	3.658
AT2G38500	7.7595	3.02125	0.389361	Down		2-oxoglutarate (2OG) and Fe(II)-dependent oxygenase superfamily protein;(source:Araport11)	0.005431	6.744	6.565	9.417	8.312	6.021	1.888	2.284	1.892
AT3G46780	57.1675	82.37	1.44085	Up	PLASTID TRANSCRIPTIONALLY ACTIVE 16 (PTAC16)	plastid transcriptionally active 16;(source:Araport11)	0.005453	63.53	60.6	49.69	54.85	79.69	74.38	84.54	90.87
AT1G23800	15.95	8.803	0.551912	Down	ALDEHYDE DEHYDROGENASE 2B7 (ALDH2B7)	Encodes a mitochondrial aldehyde dehydrogenase; nuclear gene for mitochondrial product.	0.005468	11.8	19.65	11.85	20.5	11.29	7.136	8.057	8.729
AT5G17340	445.55	243.55	0.546628	Down		Putative membrane lipoprotein;(source:Araport11)	0.00547	485.9	323.6	601.9	370.8	225.7	274.2	297.6	176.7
AT3G42660	6.53675	10.5328	1.61131	Up	ENHANCER OF LHP1 (EOL1)	Ctf4 related nuclear protein. Interacts with LHP1-PRC2 to maintain H3K27 methylation in rapidly dividing cells. EOL1 expression is restricted to rapidly dividing cells.	0.005473	6.671	7.916	5.557	6.003	8.894	8.898	9.849	14.49
AT5G08480	15.7675	8.25875	0.523783	Down		VQ motif-containing protein;(source:Araport11)	0.005475	16.8	14.99	17.51	13.77	7.753	10.65	9.667	4.965
AT4G35010	72.245	36.0625	0.499169	Down	BETA-GALACTOSIDASE 11 (BGAL11)	putative beta-galactosidase (BGAL11 gene)	0.005497	51.85	84.6	81.07	71.46	60.45	25.89	27.42	30.49
AT5G60100	5.5935	8.82725	1.57813	Up	PSEUDO-RESPONSE REGULATOR 3 (PRR3)	Encodes pseudo-response regulator 3 (APRR3/PRR3). PRR3 transcript levels vary in a circadian pattern with peak expression at dusk under long and short day conditions. PRR3 affects the period of the circadian clock and seedlings with reduced levels of PRR3 have shorter periods, based on transcriptional assays of clock-regulated genes. PRR3 is expressed in the vasculature of cotyledons and leaves w…	0.005508	5.905	5.854	5.836	4.779	7.745	8.147	9.601	9.816
AT1G52570	20.0575	11.5532	0.576006	Down	PHOSPHOLIPASE D ALPHA 2 (PLDALPHA2)	member of C2-PLD subfamily	0.005575	14.75	26.31	19.95	19.22	13.4	8.783	12.98	11.05
ATMG01320	4.7825	10.4185	2.17846	Up			0.005575	4.668	4.701	6.348	3.413	9.934	7.164	8.176	16.4
AT1G32920	12.67	22.2475	1.75592	Up		hypothetical protein;(source:Araport11)	0.005627	14.71	11.65	12.7	11.62	17.39	29.14	21	21.46
AT1G01580	2.587	0.7351	0.284152	Down	FERRIC REDUCTION OXIDASE 2 (FRO2)	Encodes the low-iron-inducible ferric chelate reductase responsible for reduction of iron at the root surface. It is likely to be the major Fe(III) chelate reductase in Arabidopsis iron metabolism. Coordinately regulated with IRT1, the major transporter responsible for high-affinity iron uptake from the soil, at both transcriptional and posttranscriptional levels. Steady state mRNA levels are reg…	0.005627	2.845	3.67	3.065	0.768	1.012	1.224	0.3952	0.3092
AT2G38770	12.3093	18.6725	1.51695	Up	EMBRYO DEFECTIVE 2765 (EMB2765)	P-loop containing nucleoside triphosphate hydrolases superfamily protein;(source:Araport11)	0.005666	13.52	13.83	9.707	12.18	16.29	16.16	18.19	24.05
AT1G65860	1.00547	2.276	2.26361	Up	FLAVIN-MONOOXYGENASE GLUCOSINOLATE S-OXYGENASE 1 (FMO GS-OX1)	belongs to the flavin-monooxygenase (FMO) family, encodes a glucosinolate S-oxygenase that catalyzes the conversion of methylthioalkyl glucosinolates to methylsulfinylalkyl glucosinolates	0.005743	0.7028	0.8311	1.106	1.382	2.88	2.299	1.894	2.031
AT3G15300	10.1423	5.55	0.547216	Down	MPK3/6-TARGETED VQP 4 (MVQ4)	VQ motif-containing protein;(source:Araport11)	0.005784	10.9	9.836	11.59	8.243	5.963	6.252	4.786	5.199
AT3G42806	2.78625	4.4645	1.60233	Up		transposable_element_gene;(source:Araport11);Mutator-like transposase family, has a 2.2e-53 P-value blast match to Q9SHN7 /450-633 Pfam PF03108 MuDR family transposase (MuDr-element domain);(source:TAIR10)	0.005864	2.845	2.594	3.109	2.597	4.718	5.245	3.989	3.906
AT5G07690	0.324625	0.824425	2.53962	Up	MYB DOMAIN PROTEIN 29 (MYB29)	Encodes a putative transcription factor (MYB29) that acts as a negative regulator of mitochondrial stress responses.	0.005864	0.25	0.3414	0.2299	0.4772	0.7434	0.6287	0.8386	1.087
AT3G58480	1.7965	0.685625	0.381645	Down		calmodulin-binding family protein;(source:Araport11)	0.005903	2.154	1.997	1.736	1.299	1.028	0.8786	0.3615	0.4744
AT3G13065	17.9325	8.59	0.479019	Down	STRUBBELIG-RECEPTOR FAMILY 4 (SRF4)	STRUBBELIG-receptor family 4;(source:Araport11)	0.005927	12.21	19.4	24.06	16.06	14.14	7.023	6.53	6.667
AT3G13275	13.025	6.914	0.530825	Down		transmembrane protein;(source:Araport11)	0.005927	13.6	13.17	11.53	13.8	8.339	8.266	5.966	5.085
AT5G64260	53.25	79.8625	1.49977	Up	EXORDIUM LIKE 2 (EXL2)	EXORDIUM like 2;(source:Araport11)	0.005927	54.89	49.55	56.78	51.78	72	69.08	89.2	89.17
AT4G29980	44.305	22.27	0.502652	Down		fasciclin-like arabinogalactan protein;(source:Araport11)	0.005927	37.55	31.38	69.29	39	20.83	27.73	24.52	16
AT2G24370	2.31025	0.7832	0.339011	Down		kinase with adenine nucleotide alpha hydrolases-like domain-containing protein;(source:Araport11)	0.005945	2.486	2.186	3.056	1.513	1.564	0.6932	0.5013	0.3743
AT5G19580	545	210.3	0.385872	Down		glyoxal oxidase-related protein;(source:Araport11)	0.005961	362.5	520.5	907.6	389.4	388.8	171.1	168.9	112.4
AT3G24640	10.5355	4.36625	0.414432	Down		lyase;(source:Araport11)	0.005961	5.962	11.02	13.56	11.6	5.925	3.7	4.332	3.508
AT5G02050	29.805	45.1475	1.51476	Up		Mitochondrial glycoprotein family protein;(source:Araport11)	0.00606	31.39	36.17	24.32	27.34	45.89	49.35	48.09	37.26
AT4G23900	82.555	49.5825	0.6006	Down		Nucleoside diphosphate kinase family protein;(source:Araport11)	0.00609	65.42	85.65	79.15	100	56.21	53.31	53.29	35.52
AT5G56150	84.3375	53.75	0.63732	Down	UBIQUITIN-CONJUGATING ENZYME 30 (UBC30)	ubiquitin-conjugating enzyme 30;(source:Araport11)	0.006111	78.11	75.15	101.3	82.79	51.43	55.41	52.96	55.2
AT1G73010	18.605	10.782	0.579522	Down	PHOSPHATE STARVATION-INDUCED GENE 2 (PS2)	Encodes PPsPase1, a pyrophosphate-specific phosphatase catalyzing the specific cleavage of pyrophosphate (Km 38.8 uM) with an alkaline catalytic pH optimum. Expression is upregulated in the shoot of cax1/cax3 mutant.	0.006173	16.33	19.13	23.12	15.84	11.51	12.29	11.23	8.098
AT4G04930	19.2275	6.6105	0.343804	Down	(DES-1-LIKE)	Encodes a sphingolipid delta4-desaturase, involved in sphingolipid biosynthesis. Specifically expressed in floral tissues. Knockout mutants were devoid of sphinga-4,8-dienine in floral tissues.	0.006192	15.26	16.16	32.37	13.12	12.97	6.076	5.075	2.321
AT4G35190	20.6725	10.7675	0.520861	Down	LONELY GUY 5 (LOG5)	Putative lysine decarboxylase family protein;(source:Araport11)	0.006204	15.21	22.01	18.26	27.21	9.371	16.15	10.33	7.219
AT5G17710	35.23	52.905	1.5017	Up	EMBRYO DEFECTIVE 1241 (EMB1241)	Chloroplast GrpE protein involved in chloroplastic response to heat stress and the correct oligomerization of the photosynthesis-related LHCII complex.	0.006212	39.56	36.34	35.64	29.38	55.71	52.24	56.41	47.26
AT3G59455	305.3	123.67	0.405077	Down		Encodes a Protease inhibitor/seed storage/LTP family protein	0.006216	174.9	316	456.1	274.2	200.5	120	124.6	49.58
AT2G32430	10.4773	6.1305	0.585125	Down		Galactosyltransferase family protein;(source:Araport11)	0.006222	9.185	12.14	8.354	12.23	7.262	7.065	5.126	5.069
AT5G44540	413.975	242.4	0.585543	Down		Tapetum specific protein TAP35/TAP44;(source:Araport11)	0.006259	391.9	378.8	580.7	304.5	218.4	267.4	251.4	232.4
AT5G62440	58.315	87.4425	1.49949	Up	(DOM1)	Encodes a protein DOMINO1 that belongs to a plant-specific gene family sharing a common motif present in the tomato DEFECTIVE CHLOROPLASTS AND LEAVES (LeDCL) protein. DOMINO1 is located in the nucleus. Arabidopsis embryos carrying the domino1 mutation grow slowly in comparison with wild type embryos and reach only the globular stage at desiccation. The primary defect of the mutation at the cellul…	0.006277	58.59	61.93	52.61	60.13	72.3	84.37	81.6	111.5
AT1G23750	20.875	11.8125	0.565868	Down		Nucleic acid-binding, OB-fold-like protein;(source:Araport11)	0.006287	20	19.58	14.17	29.75	11.45	12.77	11.58	11.45
AT5G49250	2.358	0.889075	0.377046	Down		Beta-galactosidase related protein;(source:Araport11)	0.00632	3.455	1.987	1.458	2.532	0.6904	0.8897	0.9172	1.059
AT4G17840	9.8015	5.6325	0.574657	Down	BALANCE OF CHLOROPHYLL METABOLISM 2 (BCM2)	CAAX protease self-immunity protein;(source:Araport11)	0.006324	9.448	9.557	7.261	12.94	6.512	6.024	4.692	5.302
AT5G40940	8.4285	4.10325	0.48683	Down	PUTATIVE FASCICLIN-LIKE ARABINOGALACTAN PROTEIN 20 (FLA20)	Fasciclin-like arabinogalactan protein. Possibly involved in embryogenesis and seed development.	0.006324	7.749	7.268	12.84	5.857	4.631	3.955	4.473	3.354
AT5G17540	6.351	3.19475	0.503031	Down		HXXXD-type acyl-transferase family protein;(source:Araport11)	0.006406	4.428	6.417	6.774	7.785	4.112	3.172	3.121	2.374
AT5G25290	4.73925	2.24875	0.474495	Down	F-BOX/DUF295 BRASSICEAE-SPECIFIC 35 (ATFDB35)	F-box protein (DUF295);(source:Araport11)	0.006427	5.124	5.138	4.69	4.005	2.282	2.282	3.03	1.401
AT5G49920	10.1705	1.7572	0.172774	Down		Octicosapeptide/Phox/Bem1p family protein;(source:Araport11)	0.006436	10.34	4.912	23.94	1.49	4.101	1.631	0.5191	0.7777
AT1G08410	17.04	25.2725	1.48313	Up	YEAST LSG1 ORTHOLOGUE 2 (LSG1-2)	Encodes a large 60S subunit nuclear export GTPase 1 that is required for 40S maturation and is involved in ribosome biogenesis and affects multiple auxin-regulated development processes.	0.006436	17.66	19.18	13.16	18.16	22.77	23.72	25.34	29.26
AT1G80480	37.98	54.205	1.4272	Up	PLASTID TRANSCRIPTIONALLY ACTIVE 17 (PTAC17)	plastid transcriptionally active 17;(source:Araport11)	0.006447	40.16	41.04	32.02	38.7	51.7	51.56	57.54	56.02
AT5G26860	8.05825	14.615	1.81367	Up	LON PROTEASE 1 (LON1)	Encodes a member of the Lon protease-like proteins (Lon1/At5g26860, Lon2/At5g47040, Lon3/At3g05780, Lon4/At3g05790). Lon is a multifunctional ATP-dependent protease which exists in bacteria, archaea and within organelles in eukaryotic cells. Lon proteases are responsible for the degradation of abnormal, damaged and unstable proteins. The mRNA is cell-to-cell mobile.	0.00646	8.468	9.751	5.676	8.338	11.33	10.95	11.99	24.19
AT2G39570	22.3875	36.3775	1.6249	Up	ACT DOMAIN REPEATS 9 (ACR9)	Encodes a ACT domain-containing protein. The ACT domain, named after bacterial aspartate kinase, chorismate mutase and TyrA (prephenate dehydrogenase), is a regulatory domain that serves as an amino acid-binding site in feedback-regulated amino acid metabolic enzymes.	0.00646	29.87	23.94	15.3	20.44	29.01	40.6	44.39	31.51
AT3G62860	8.65025	5.09375	0.588856	Down	(MAGL12)	alpha/beta-Hydrolases superfamily protein;(source:Araport11)	0.006478	9.881	9.028	6.706	8.986	5.317	5.094	4.573	5.391
AT3G57180	6.38725	9.85575	1.54303	Up	BRASSINAZOLE(BRZ) INSENSITIVE PALE GREEN 2 (BPG2)	Encodes a chloroplast localized protein YL1/BPG2. Involved in seedling shoot response to salt stress through ABI4.	0.006608	7.615	7.332	5.113	5.489	9.432	8.721	10.08	11.19
AT3G10420	29.68	19.87	0.669474	Down	SEEDLING PLASTID DEVELOPMENT 1 (SPD1)	P-loop containing nucleoside triphosphate hydrolases superfamily protein;(source:Araport11)	0.006644	27.06	31.57	27.01	33.08	20.33	20.58	19.93	18.64
AT2G27145	3.503	0.84805	0.242092	Down	LOW-MOLECULAR-WEIGHT CYSTEINE-RICH 9 (LCR9)	Encodes a member of a family of small,secreted, cysteine rich protein with sequence similarity to the PCP (pollen coat protein) gene family.	0.006647	1.724	5.286	3.531	3.471	1.239	1.257	0.8962	0
AT1G03220	4.17025	7.32075	1.75547	Up	SECRETED ASPARTIC PROTEASE 2 (SAP2)	Eukaryotic aspartyl protease family protein;(source:Araport11)	0.006674	5.392	4.307	4.139	2.843	7.8	7.451	7.585	6.447
AT5G01320	0.6577	0.25405	0.38627	Down		Thiamine pyrophosphate dependent pyruvate decarboxylase family protein;(source:Araport11)	0.006678	0.5061	0.7703	0.8196	0.5348	0.269	0.2022	0.2419	0.3031
AT3G50480	1.22437	3.879	3.16815	Up	HOMOLOG OF RPW8 4 (HR4)	Homolog of RPW8	0.006705	1.393	1.505	1.056	0.9435	1.829	7.162	1.392	5.133
AT5G05380	30.3475	17.1525	0.565203	Down	PRENYLATED RAB ACCEPTOR 1.B3 (PRA1.B3)	prenylated RAB acceptor 1.B3;(source:Araport11)	0.006715	24.53	26.89	39.97	30	21.7	17.01	15.78	14.12
AT1G15000	13.7075	20.065	1.4638	Up	SERINE CARBOXYPEPTIDASE-LIKE 50 (scpl50)	serine carboxypeptidase-like 50;(source:Araport11)	0.006749	13.86	14.2	12.04	14.73	19.23	19.36	19.34	22.33
AT4G39670	3.41075	1.1498	0.337111	Down	PHOSPHOLIPASE-LIKE PROTEIN (GLTP)	Glycolipid transfer protein (GLTP) family protein;(source:Araport11)	0.006749	3.877	3.316	4.552	1.898	2.081	1.092	0.7413	0.6849
AT5G09550	53.6875	30.5375	0.568801	Down	RAB GDP-DISSOCIATION INHIBITOR (GDI)	GDP dissociation inhibitor family protein / Rab GTPase activator family protein;(source:Araport11)	0.006793	39.87	66.92	59.9	48.06	39.63	23.67	33.56	25.29
AT5G09470	1.20503	0.422475	0.350594	Down	DICARBOXYLATE CARRIER 3 (DIC3)	Encodes one of the mitochondrial dicarboxylate carriers (DIC): DIC1 (AT2G22500), DIC2 (AT4G24570), DIC3 (AT5G09470).	0.006797	0.9971	1.186	1.583	1.054	0.2552	0.4648	0.6186	0.3513
AT4G26990	12.81	7.928	0.618891	Down		polyadenylate-binding protein interacting protein;(source:Araport11)	0.006797	11.14	11.8	15.19	13.11	8.194	7.917	8.268	7.333
AT5G07540	154.95	94.0825	0.60718	Down	GLYCINE-RICH PROTEIN 16 (GRP16)	encodes a glycine-rich protein that is expressed only in flowers during a specific developmental stage (flower stages 11 and 12).	0.006815	115.3	189.4	146.2	168.9	98.7	70.35	95.08	112.2
AT1G22130	21.21	10.585	0.499057	Down	AGAMOUS-LIKE 104 (AGL104)	Encodes a member of the MIKC (MADS box, Keratin binding domain, and C terminal domain containing )family of transcriptional regulators. AGL104 is expressed in pollen.It forms heterodimers with other MICK family members (AGL65 and AGL30). Involved in late stages of pollen development and pollen tube growth.	0.006843	17.03	24.02	24.71	19.08	14.8	10.52	11.61	5.41
AT1G51380	4.6125	8.76	1.89919	Up		DEA(D/H)-box RNA helicase family protein;(source:Araport11)	0.006848	5.261	4.642	2.228	6.319	7.041	10.17	8.187	9.642
AT1G64490	18.05	30.63	1.69695	Up		DEK, chromatin associated protein;(source:Araport11)	0.006888	19.35	18.83	14.39	19.63	24.36	29.84	24.35	43.97
AT2G41040	103.795	68.4525	0.659497	Down		S-adenosyl-L-methionine-dependent methyltransferases superfamily protein;(source:Araport11)	0.006938	105.8	97.31	95.47	116.6	57.3	80.52	72.79	63.2
AT1G79900	9.596	5.18925	0.540772	Down	(BAC2)	encodes a mitochondrial ornithine transporter that exports ornithine from the mitochondria to the cytosol	0.006941	8.117	9.594	9.693	10.98	6.857	5.879	4.448	3.573
AT5G54870	30.26	18.86	0.623265	Down		inositol-1,4,5-trisphosphate 5-phosphatase;(source:Araport11)	0.006948	24.1	33.3	33.47	30.17	21.41	18.18	19.65	16.2
AT1G57690	0.615275	0.1679	0.272886	Down		F-box/RNI-like superfamily protein;(source:Araport11)	0.006975	0.6807	0.8872	0.6602	0.233	0.1797	0.1688	0.1444	0.1787
AT5G66830	10.1867	5.3625	0.526419	Down	F-BOX/DUF295 BRASSICEAE-SPECIFIC 38 (ATFDB38)	F-box protein (DUF295);(source:Araport11)	0.007097	8.055	9.631	13.61	9.451	6.72	5.001	5.399	4.33
AT5G49180	2.7015	0.970175	0.359125	Down	PECTIN METHYLESTERASE 58 (PME58)	Encodes a putative pectin methylesterase. The gene is preferentially expressed in floral buds and more specifically in mucilage secretory cells of seeds. Mutants have smaller mucilage cells and abnormal mucilage profiles.	0.007181	3.332	2.286	3.337	1.851	1.566	1.324	0.5358	0.4549
AT2G19330	17.395	7.50625	0.431518	Down	PLANT INTRACELLULAR RAS GROUP-RELATED LRR 6 (PIRL6)	Encodes PIRL6, a member of the Plant Intracellular Ras-group-related LRRs (Leucine rich repeat proteins). PIRLs are a distinct, plant-specific class of intracellular LRRs that likely mediate protein interactions, possibly in the context of signal transduction.	0.007222	13.94	16.51	26.97	12.16	13.16	5.471	5.822	5.572
AT4G36390	11.4425	17.015	1.487	Up		Methylthiotransferase;(source:Araport11)	0.007267	12.69	12.09	10.87	10.12	16.7	15.26	16.9	19.2
AT5G57710	3.647	5.8715	1.60995	Up	SUPPRESSOR OF MAX2 1 (SMAX1)	SMAX1 (SUPPRESSOR OF MAX2 1) is a member of an eight-gene family in Arabidopsis that has weak similarity to AtHSP101, a ClpB chaperonin required for thermotolerance. SMAX1 is an important component of KAR/SL signaling during seed germination and seedling growth, but is not necessary for all MAX2-dependent responses. The mRNA is cell-to-cell mobile.	0.007267	3.713	3.756	3.751	3.368	5.256	5.045	5.372	7.813
AT3G50830	94.685	57.5225	0.607514	Down	COLD-REGULATED 413-PLASMA MEMBRANE 2 (COR413-PM2)	cold acclimation protein WCOR413-like protein beta form. Transcript is not detectable.	0.007303	79.45	83.16	124.9	91.23	57.59	65.78	56.38	50.34
AT3G22340	0.380275	0.0865725	0.227658	Down		transposable_element_gene;(source:Araport11);copia-like retrotransposon family, has a 4.2e-60 P-value blast match to GB:AAC02666 polyprotein (Ty1_Copia-element) (Arabidopsis thaliana);(source:TAIR10)	0.007349	0.3619	0.3274	0.4019	0.4299	0.065	0.03664	0.08955	0.1551
AT4G02970	1.6755	0.684275	0.4084	Down	7SL RNA1 (AT7SL-1)	Signal recognition particle. Type 4 of RNA polymerase III dependent genes.	0.007349	1.476	1.864	1.711	1.651	0.6096	1.031	0.5291	0.5674
AT5G54095	43.0532	7.14425	0.16594	Down		proteoglycan-like protein;(source:Araport11)	0.007476	55.18	27.55	80.14	9.343	15.23	10.88	1.008	1.459
AT3G48360	0.4945	1.89332	3.82877	Up	BTB AND TAZ DOMAIN PROTEIN 2 (bt2)	Encodes a protein (BT2) that is an essential component of the TAC1-mediated telomerase activation pathway. Acts redundantly with BT3 and BT1 during female gametophyte development and with BT3 during male gametophyte development. BT2 also mediates multiple responses to nutrients, stresses, and hormones.	0.007476	0.6419	0.6363	0.5552	0.1446	0.8123	1.025	1.572	4.164
AT1G23730	103.873	52.9225	0.509495	Down	BETA CARBONIC ANHYDRASE 3 (BCA3)	beta carbonic anhydrase 3;(source:Araport11)	0.007476	60.14	121.4	135.9	98.05	72.47	45.65	57.27	36.3
AT3G55400	31.985	45.895	1.43489	Up	OVULE ABORTION 1 (OVA1)	methionyl-tRNA synthetase / methionine-tRNA ligase / MetRS (cpMetRS);(source:Araport11)	0.007476	34.49	34.17	30.08	29.2	44.81	41.94	45.65	51.18
ATCG00530	62.135	115.938	1.8659	Up	(YCF10)	CemA-like proton extrusion protein-like protein;(source:Araport11)	0.007476	59.76	69.74	68.94	50.1	94.73	84.02	87	198
AT1G10770	27.825	8.1615	0.293315	Down		Encodes a putative pectin methylesterase/invertase inhibitor. Anti-sense reduction of this gene's transcript results in pollen tube growth retardation and then partial male sterility and reduced seed set.	0.007554	23.8	20.45	47.21	19.84	19.04	6.155	5.128	2.323
AT3G61060	5.586	10.0077	1.79158	Up	PHLOEM PROTEIN 2-A13 (PP2-A13)	phloem protein 2-A13;(source:Araport11)	0.007554	7.834	5.865	3.747	4.898	7.004	12.21	9.727	11.09
AT4G33050	0.72765	1.7328	2.38136	Up	EMBRYO SAC DEVELOPMENT ARREST 39 (EDA39)	Encodes a calmodulin-binding protein involved in stomatal movement.	0.007591	0.8263	0.7602	0.6899	0.6342	0.8252	2.23	1.534	2.342
AT4G28080	43.04	74.805	1.73803	Up	REDUCED CHLOROPLAST COVERAGE 2 (REC2)	Encodes REDUCED CHLOROPLAST COVERAGE 2 (REC2). Along with REC1 and REC3 it contributes to establishing the size of the chloroplast compartment.	0.00764	48.44	47.26	37.11	39.35	62.76	53.67	61.69	121.1
AT5G38760	762.6	344.975	0.452367	Down		Late embryogenesis abundant protein (LEA) family protein;(source:Araport11)	0.00764	505.1	742.3	1167	636	520.2	334.1	353.1	172.5
AT5G62920	26.3325	15.1797	0.576464	Down	RESPONSE REGULATOR 6 (ARR6)	Encodes a Type-A response regulator that is responsive to cytokinin treatment. Its C-ter domain is very short in comparison to other Arabidopsis ARRs (17 total). Arr6 protein is stabilized by cytokinin.	0.00764	26.22	27.3	26.63	25.18	19.48	17.04	14.69	9.509
AT5G50790	112.335	67.5275	0.601126	Down	(SWEET10)	Encodes a member of the SWEET sucrose efflux transporter family proteins. Transcriptionally activated by long photoperiods; activation depends on FT and SOC1. The ectopic expression of SWEET10 causes early flowering and leads to higher levels of transcription of flowering-time related genes in the shoot apex.	0.00764	121.3	98.88	134.2	94.96	63.22	84.55	73.2	49.14
AT5G46200	4.56725	1.80835	0.395938	Down		carboxyl-terminal proteinase-like protein (DUF239);(source:Araport11)	0.00764	3.696	5.704	5.146	3.723	3.291	1.397	1.681	0.8644
AT1G14755	6.46025	2.293	0.35494	Down		Encodes a defensin-like (DEFL) family protein.	0.007688	7.199	4.44	9.106	5.096	3.934	2.129	2.053	1.056
AT1G61700	10.5667	5.23675	0.495588	Down		Protein of unknown function that is homologous to the At1g11475 locus that encodes a non-catalytic subunit common to nuclear DNA-dependent RNA polymerases II, IV and V. Homologous to budding yeast RPB10.	0.007703	9.084	11.77	11.46	9.953	4.788	5.82	6.59	3.749
AT5G04140	18.625	29.4625	1.58188	Up	GLUTAMATE SYNTHASE 1 (GLU1)	Encodes a gene whose sequence is similar to ferredoxin dependent glutamate synthase (Fd-GOGAT). Expression in leaves is induced by light and sucrose. Proposed to be involved in photorespiration and nitrogen assimilation. The mRNA is cell-to-cell mobile.	0.007707	20.31	21.54	14.65	18	27.91	22.14	26.23	41.57
AT1G79640	46.99	30.845	0.656416	Down		Protein kinase superfamily protein;(source:Araport11)	0.00777	49.01	48.25	52.61	38.09	32	31.2	31.62	28.56
AT5G03480	8.59775	4.639	0.53956	Down		RNA-binding (RRM/RBD/RNP motifs) family protein;(source:Araport11)	0.007799	7.398	7.788	10.99	8.215	4.515	4.998	4.782	4.261
AT4G29410	120.537	178.9	1.48419	Up		Ribosomal L28e protein family;(source:Araport11)	0.007889	128.2	132.8	87.95	133.2	166	215.4	181.6	152.6
ATCG01040	0.956075	2.81125	2.94041	Up	(YCF5)	Cytochrome C assembly protein;(source:Araport11)	0.007889	1.202	0.964	1.166	0.4923	2.491	1.257	2.428	5.069
AT4G30270	47.165	23.2075	0.492049	Down	XYLOGLUCAN ENDOTRANSGLUCOSYLASE/HYDROLASE 24 (XTH24)	encodes a protein similar to endo xyloglucan transferase in sequence. It is also very similar to BRU1 in soybean, which is involved in brassinosteroid response.	0.007892	26.42	51.39	62.01	48.84	32.24	21.78	24.62	14.19
AT5G06820	6.8695	4.236	0.616639	Down	STRUBBELIG-RECEPTOR FAMILY 2 (SRF2)	STRUBBELIG-receptor family 2;(source:Araport11)	0.007892	8.42	6.655	6.37	6.033	4.514	4.115	4.283	4.032
AT1G23660	12.046	6.7845	0.563216	Down		hypothetical protein (Domain of unknown function DUF220);(source:Araport11)	0.007892	11.84	15.39	9.064	11.89	6.669	5.562	6.608	8.299
AT3G60010	4.7955	2.08	0.43374	Down	SKP1-LIKE 13 (SK13)	SKP1-like 13;(source:Araport11)	0.007892	4.153	3.979	4.333	6.717	2.26	2.019	1.828	2.213
AT5G59890	55.655	35.3275	0.634759	Down	ACTIN DEPOLYMERIZING FACTOR 4 (ADF4)	actin depolymerizing factor 4 (ADF4) mRNA, complete cds	0.007892	56.5	57.25	50.83	58.04	36.22	42.49	36.35	26.25
AT2G45800	12.9467	2.3356	0.1804	Down	PLIM2A (PLIM2a)	Encodes a member of the Arabidopsis LIM proteins: a family of actin bundlers with distinct expression patterns. WLIM1, WLIM2a, and WLIM2b are widely expressed, whereas PLIM2a, PLIM2b, and PLIM2c are predominantly expressed in pollen. Regulates actin cytoskeleton organization.	0.007892	17.47	8.551	23.24	2.526	4.383	3.968	0.5356	0.4558
AT4G35670	7.7095	2.606	0.338025	Down		Pectin lyase-like superfamily protein;(source:Araport11)	0.007902	3.613	10.33	8.307	8.588	5.242	1.506	2.413	1.263
AT3G42383	0.0039925	0.044985	11.2674	Up		transposable_element_gene;(source:Araport11);gypsy-like retrotransposon family, has a 5.1e-209 P-value blast match to GB:AAD27547 polyprotein (Gypsy_Ty3-element) (Oryza sativa subsp. indica);(source:TAIR10)	0.007907	0	0	0.0041	0.01187	0.07117	0.03439	0.02889	0.04549
AT4G23870	15.4075	24.095	1.56385	Up		hypothetical protein;(source:Araport11)	0.007922	14.6	15.38	13.22	18.43	19.12	26.7	23.38	27.18
AT3G42640	16.945	8.914	0.526055	Down	H(+)-ATPASE 8 (HA8)	H[+]-ATPase 8;(source:Araport11)	0.00793	16.21	16.51	20.88	14.18	14.2	7.119	6.081	8.256
AT1G11260	14.9275	22.7525	1.5242	Up	SUGAR TRANSPORTER 1 (STP1)	Encodes a H+/hexose cotransporter. The mRNA is cell-to-cell mobile.	0.00793	17.93	14.1	14.66	13.02	20.75	19.68	24.28	26.3
AT1G28270	79.4175	29.69	0.373847	Down	RALF-LIKE 4 (RALFL4)	Member of a diversely expressed predicted peptide family showing sequence similarity to tobacco Rapid Alkalinization Factor (RALF), and is believed to play an essential role in the physiology of Arabidopsis. Consists of a single exon and is characterized by a conserved C-terminal motif and N-terminal signal peptide. RALF4 and RALF19 act redundantly in the pollen tube to regulate pollen tube growt…	0.007944	61.49	76.25	115.8	64.13	58.74	27.81	22.07	10.14
AT3G21900	4.10375	1.7175	0.41852	Down		Receptor-like protein kinase-related family protein;(source:Araport11)	0.007944	2.821	4.188	5.012	4.394	2.501	1.336	1.619	1.414
AT1G29450	1.8295	0.6216	0.339765	Down	SMALL AUXIN UPREGULATED RNA 64 (SAUR64)	SAUR-like auxin-responsive protein family;(source:Araport11)	0.007944	2.613	1.861	1.369	1.475	0.9028	0.794	0.4664	0.3232
AT2G26630	0.02	0.22969	11.4845	Up		transposable_element_gene;(source:Araport11);transposase IS4 family protein, contains Pfam profile: PF01609 transposase DDE domain;(source:TAIR10)	0.007945	0	0.02842	0.05158	0	0.2078	0.1622	0.09086	0.4579
AT5G07220	10.6997	6.55175	0.612327	Down	BCL-2-ASSOCIATED ATHANOGENE 3 (BAG3)	A member of Arabidopsis BAG (Bcl-2-associated athanogene) proteins, plant homologs of mammalian regulators of apoptosis. Plant BAG proteins are multi-functional and remarkably similar to their animal counterparts, as they regulate apoptotic-like processes ranging from pathogen attack, to abiotic stress, to plant development.	0.007945	10.75	12.82	8.139	11.09	6.535	6.382	7.05	6.24
AT2G18120	1.9995	0.79875	0.399475	Down	SHI-RELATED SEQUENCE 4 (SRS4)	A member of SHI gene family. Arabidopsis thaliana has ten members that encode proteins with a RING finger-like zinc finger motif. Despite being highly divergent in sequence, many of the SHI-related genes are partially redundant in function and synergistically promote gynoecium, stamen and leaf development in Arabidopsis.	0.008073	1.636	2.475	1.71	2.177	0.792	0.6481	1.069	0.6859
AT3G21540	4.5225	7.25375	1.60392	Up		transducin family protein / WD-40 repeat family protein;(source:Araport11)	0.008093	5.116	5.437	2.864	4.673	6.368	6.684	6.892	9.071
AT2G18220	12.555	21.61	1.72123	Up	NUCLEOLAR COMPLEX ASSOCIATED 2 (NOC2)	Noc2p family;(source:Araport11)	0.008093	12.99	13.23	10.14	13.86	16.2	17.46	17.99	34.79
AT3G01230	13.6082	2.73497	0.200979	Down		splicing regulatory glutamine/lysine-rich-like protein;(source:Araport11)	0.008102	17.19	11.59	18.44	7.213	6.442	3.543	0.3924	0.5625
AT2G44640	17.845	25.98	1.45587	Up		TRIGALACTOSYLDIACYLGLYCEROL-like protein;(source:Araport11)	0.008129	20.63	19.4	14.08	17.27	25.15	25.23	27.76	25.78
AT4G10320	27.31	41.2	1.5086	Up		tRNA synthetase class I (I, L, M and V) family protein;(source:Araport11)	0.008129	28.74	31.86	22.3	26.34	36.21	36.53	36.82	55.24
AT1G01355	3.4275	1.51725	0.44267	Down		Putative endonuclease or glycosyl hydrolase;(source:Araport11)	0.00815	3.615	3.744	3.724	2.627	1.933	1.415	1.223	1.498
AT1G72900	0.79695	1.8365	2.30441	Up		Toll-Interleukin-Resistance (TIR) domain-containing protein;(source:Araport11)	0.008152	0.9434	0.6478	0.729	0.8676	1.02	2.194	2.071	2.061
AT3G61230	4.39375	1.00095	0.227812	Down	POLLEN-SPECIFIC LIM PROTEIN 2C (PLIM2c)	Encodes a member of the Arabidopsis LIM proteins: a family of actin bundlers with distinct expression patterns. WLIM1, WLIM2a, and WLIM2b are widely expressed, whereas PLIM2a, PLIM2b, and PLIM2c are predominantly expressed in pollen. Regulates actin cytoskeleton organization.	0.008222	5.975	3.439	6.943	1.218	2.174	1.103	0.4155	0.3113
AT1G10747	6.457	2.94325	0.455823	Down	EMBRYO SURROUNDING FACTORS 1.1 (ESF1.1)	Encodes a Maternally expressed gene (MEG) family protein	0.008237	7.578	5.649	7.206	5.395	3.156	3.082	3.307	2.228
AT4G19430	83.2525	27.63	0.331882	Down		hypothetical protein;(source:Araport11)	0.008253	61.15	47	190.4	34.46	39.43	31.3	24.73	15.06
AT1G15510	2.061	3.70575	1.79803	Up	EARLY CHLOROPLAST BIOGENESIS2 (ECB2)	Encodes a pentatricopeptide repeat protein required for chloroplast transcript accD RNA editing and early chloroplast biogenesis.	0.008253	2.276	2.284	1.851	1.833	3.172	3.031	3.215	5.405
AT5G24890	11.6875	19.075	1.63209	Up		stress response NST1-like protein;(source:Araport11)	0.008253	13.17	10.9	10.51	12.17	14.41	17.81	17.06	27.02
AT4G16390	18.325	27.0475	1.47599	Up	SUPPRESSOR OF VARIEGATION 7 (SVR7)	Encodes a pentatricopeptide repeat protein, SVR7 (SUPPRESSOR OF VARIEGATION7), required for FtsH-mediated chloroplast biogenesis. It is involved in accumulation and translation of chloroplast ATP synthase subunits.	0.008259	20.45	20.35	13.94	18.56	25.54	24.55	25.78	32.32
AT1G66120	0.550655	0.020495	0.0372193	Down	ACYL-ACTIVATING ENZYME 11 (AAE11)	AMP-dependent synthetase and ligase family protein;(source:Araport11)	0.00827	0.1119	0.08572	2.005	0	0.03215	0	0.04983	0
AT5G37130	12.405	18.45	1.4873	Up		Protein prenylyltransferase superfamily protein;(source:Araport11)	0.008276	13.92	14.23	10.16	11.31	17.06	16.33	18.03	22.38
AT3G21110	24.5675	35.3425	1.43859	Up	PURIN 7 (PUR7)	5'-phosphoribosyl-4-(N-succinocarboxamide)-5-aminoimidazole synthetase (PUR7, syn. SAICAR synthetase), catalyzes aspartate addition at the alpha-amino group to the growing purine backbone.	0.008291	24.76	24.98	24.17	24.36	34.99	33.65	35.52	37.21
AT4G38570	53.75	34.865	0.648651	Down	PROBABLE CDP-DIACYLGLYCEROL--INOSITOL 3-PHOSPHATIDYLTRANSFERASE 2 (PIS2)	Putative CDP-diacylglycerol-inositol 3-phosphatidyltransferase 2;(source:Araport11)	0.008351	53.56	52.66	44.22	64.56	32.51	40.96	35.46	30.53
AT4G31120	39.8325	56.995	1.43087	Up	SHK1 BINDING PROTEIN 1 (SKB1)	Involved in vernalization. Required for epigenetic silencing of FLC, and for vernalization-mediated histone modification.	0.008351	44.35	42.99	29.34	42.65	52.84	58.42	56.94	59.78
AT4G29130	35.7125	23.31	0.652713	Down	HEXOKINASE 1 (HXK1)	Encodes a hexokinase (HXK1) in the plant glucose-signaling network. Functions as a glucose sensor to interrelate nutrient, light, and hormone signaling networks for controlling growth and development in response to the changing environment.	0.008387	36.6	40.91	27.12	38.22	24.18	25.42	23.78	19.86
AT3G09720	7.31975	11.467	1.56658	Up	RNA HELICASE 57 (RH57)	P-loop containing nucleoside triphosphate hydrolases superfamily protein;(source:Araport11)	0.008433	8.311	8.612	4.828	7.528	9.468	11.35	11.38	13.67
AT3G28960	12.315	7.294	0.592286	Down		Transmembrane amino acid transporter family protein;(source:Araport11)	0.008433	10.97	12	10.8	15.49	8.06	7.338	7.757	6.021
AT2G32310	1.6705	0.67515	0.40416	Down		CCT motif family protein;(source:Araport11)	0.008442	2.236	1.504	1.406	1.536	0.752	0.7515	0.83	0.3671
AT5G35110	21.5575	8.4575	0.392323	Down		hypothetical protein;(source:Araport11)	0.008442	21.85	16.16	37.78	10.44	11.23	9.396	7.342	5.862
ATCG00150	43.0725	90.475	2.10053	Up	(ATPI)	Encodes a subunit of ATPase complex CF0, which is a proton channel that supplies the proton motive force to drive ATP synthesis by CF1 portion of the complex.	0.008464	40.1	45.39	49.53	37.27	69.78	51.86	65.96	174.3
AT1G79910	65.8075	28.9725	0.440261	Down	IST1-LIKE 8 (ISTL8)	Regulator of Vps4 activity in the MVB pathway protein;(source:Araport11)	0.008502	38.28	59.77	68.21	96.97	51.55	19	18.21	27.13
AT1G69940	494.35	210.575	0.425963	Down	(PPME1)	Encodes a protein with pectin methylesterase activity. The protein expression was shown to be highly restricted to the pollen grain (no detection in any other tissues or in the pollen grains' surrounding cells of the anthers.	0.008586	347.5	521.7	625.4	482.8	405.4	176.6	156.3	104
AT3G57810	61.0775	39.17	0.641316	Down		Cysteine proteinases superfamily protein;(source:Araport11)	0.008627	58.4	69.89	56.07	59.95	43.16	41.74	43.02	28.76
AT5G25880	12.6815	6.94075	0.547313	Down	NADP-MALIC ENZYME 3 (NADP-ME3)	The malic enzyme (EC 1.1.1.40) encoded by the ATNADP-ME3 is presumably cytosolic and restricted in its expression by both developmental and cell-specific signals.	0.008627	8.806	16.24	12.2	13.48	9.923	5.654	5.731	6.455
AT4G09450	9.23425	4.55375	0.493137	Down		Duplicated homeodomain-like superfamily protein;(source:Araport11)	0.00874	11.53	9.088	8.071	8.248	4.816	4.971	5.574	2.854
AT2G41475	12.2565	6.6105	0.539346	Down	EMBRYO-SPECIFIC PROTEIN 3A (ATS3A)	Embryo-specific protein 3, (ATS3);(source:Araport11)	0.008767	9.096	11.92	11.56	16.45	6.706	8.177	5.862	5.697
ATMG00080	7.528	17.6975	2.35089	Up	RIBOSOMAL PROTEIN L16 (RPL16)	encodes a mitochondrial ribosomal protein L16, which is a constituent of the large ribosomal subunit	0.008827	7	7.57	6.544	8.998	11.93	12.11	10.87	35.88
AT4G08991	22.54	12.1418	0.538676	Down		Pseudogene of AT4G14145	0.008827	23.75	22.12	19.95	24.34	12.18	15.45	12.99	7.947
AT2G38360	58.5525	34.165	0.583493	Down	PRENYLATED RAB ACCEPTOR 1.B4 (PRA1.B4)	prenylated RAB acceptor 1.B4;(source:Araport11)	0.008857	45.09	55.13	79.08	54.91	39.28	37.66	31.99	27.73
AT1G30710	1.5645	0.264725	0.169207	Down	(ATBBE9)	FAD-binding Berberine family protein;(source:Araport11)	0.008881	0.5729	0.3659	4.902	0.4172	0.4008	0.2015	0.2239	0.2327
AT2G25810	20.6575	12.0282	0.58227	Down	TONOPLAST INTRINSIC PROTEIN 4;1 (TIP4;1)	tonoplast intrinsic protein 4;(source:Araport11)	0.008933	20.65	18.66	19.91	23.41	11.98	16.13	12.36	7.643
AT5G53770	11.051	16.505	1.49353	Up	TRF4/5-LIKE (TRL)	Nucleotidyltransferase family protein;(source:Araport11)	0.008946	13.08	11.52	8.884	10.72	14.77	16.04	15.14	20.07
AT1G03630	40.3925	57.0925	1.41344	Up	PROTOCHLOROPHYLLIDE OXIDOREDUCTASE C (POR C)	Encodes for a protein with protochlorophyllide oxidoreductase activity. The enzyme is NADPH- and light-dependent.	0.008968	42.38	42.93	35.59	40.67	56.44	55.38	61.87	54.68
AT2G46140	68.8425	37.9	0.550532	Down	LATE EMBRYOGENESIS ABUNDANT 27 (LEA27)	Late embryogenesis abundant protein;(source:Araport11)	0.008968	63.04	74.02	67.61	70.7	54.49	37.05	38.84	21.22
AT4G35420	265	163.175	0.615755	Down	DIHYDROFLAVONOL 4-REDUCTASE-LIKE1 (DRL1)	Encodes DRL1 (Dihydroflavonol 4-reductase-like1), a closely related homolog of the rice anther-specific gene OsDFR2. DRL1 may be involved in a metabolic pathway essential for pollen wall development and male fertility. Mutant plants have impaired pollen formation and seed production.	0.009035	331.1	247.6	239.8	241.5	112.8	181	150.2	208.7
AT1G21070	9.64175	5.772	0.598647	Down	UDP-RHA/UDP-GAL TRANSPORTER 2 (URGT2)	Nucleotide-sugar transporter family protein;(source:Araport11)	0.009094	8.859	9.128	8.65	11.93	6.007	6.564	5.985	4.532
AT4G38440	5.14725	9.55175	1.8557	Up	MINIYO (IYO)	Encodes MINIYO (IYO), a positive regulator of transcriptional elongation that is essential for cells to initiate differentiation.	0.009095	5.784	6.056	3.686	5.063	7.587	6.096	8.074	16.45
AT3G12670	45.2675	67.9975	1.50213	Up	EMBRYO DEFECTIVE 2742 (emb2742)	Cytidine triphosphate synthase.	0.009095	49.26	49.92	32.49	49.4	58.01	60.48	66.13	87.37
AT4G28088	28.4975	12.8375	0.450478	Down		Low temperature and salt responsive protein family;(source:Araport11)	0.009141	14.33	30.87	29.73	39.06	15.93	11.61	13.35	10.46
AT5G48485	484.8	305.775	0.630724	Down	DEFECTIVE IN INDUCED RESISTANCE 1 (DIR1)	Encodes a putative apoplastic lipid transfer protein that is involved in systemic acquired resistance. Mutants in this gene exhibit wild-type local resistance to avirulent and virulent Pseudomonas syringae, but pathogenesis-related gene expression is abolished in uninoculated distant leaves and fail to develop SAR to virulent Pseudomonas or Peronospora parasitica. DIR1 protein is cell-to-cell mob…	0.009154	526.2	433.3	443.7	536	314.2	370.8	317.6	220.5
AT2G16910	20.7625	13.3375	0.642384	Down	ABORTED MICROSPORES (AMS)	Encodes a basic helix-loop helix transcription factor involved in tapetal cell development, that directly regulates MGT5 expression in tapetum cells. Loss of function mutations are male sterile. AMS binds to a region termed the E box of target gene promoters.	0.009175	24.9	20.05	16.3	21.8	10.73	14.53	12.84	15.25
AT4G01230	13.02	6.6265	0.508948	Down	RETICULON-LIKE B 7 (RTNLB7)	Reticulon family protein. Mutants are resistant to agrobacterium infection.	0.009287	10.64	12.06	16.91	12.47	8.403	5.795	7.587	4.721
AT3G27416	176.713	67.2325	0.380463	Down		transmembrane protein;(source:Araport11)	0.00934	89.45	139.7	340.6	137.1	120	54.09	55.82	39.02
AT4G01490	0.783025	1.431	1.82753	Up		transposable_element_gene;(source:Araport11);non-LTR retrotransposon family (LINE), has a 2.4e-44 P-value blast match to GB:AAB41224 ORF2 (LINE-element) (Rattus norvegicus);(source:TAIR10)	0.009352	0.994	0.5873	0.7273	0.8235	1.311	1.263	1.271	1.879
AT1G16510	77.215	44.5775	0.577317	Down	SMALL AUXIN UPREGULATED 41 (SAUR41)	Encodes a clade III SAUR gene with a distinctive expression pattern in root meristems. It is normally expressed in the quiescent center and cortex/endodermis initials and upon auxin stimulation, the expression is found in the endodermal layer. Overexpression studies suggest roles in cell expansion and auxin transport.	0.009366	77.74	54.17	111.2	65.75	43.01	45.45	46.35	43.5
AT1G74010	4.34725	1.77375	0.408017	Down		Calcium-dependent phosphotriesterase superfamily protein;(source:Araport11)	0.00941	4.813	2.937	7	2.639	2.496	1.763	1.548	1.288
AT2G32885	0.981525	0.3208	0.326838	Down		Encodes a Rapid ALkalinization Factor (RALF) family protein	0.009486	0.9094	0.7973	1.599	0.6204	0.443	0.487	0.1946	0.1586
AT1G72040	45.05	68.525	1.52109	Up	DEOXYRIBONUCLEOSIDE KINASE (DNK)	Encodes a multisubstrate deoxyribonucleoside kinase that salvages DNA precursors.	0.009577	55.16	48.91	28.1	48.03	60.97	65.14	66.53	81.46
AT5G09610	1.933	0.90285	0.467072	Down	PUMILIO 21 (PUM21)	Encodes a member of the Arabidopsis Pumilio (APUM) proteins containing PUF domain (eight repeats of approximately 36 amino acids each). PUF proteins regulate both mRNA stability and translation through sequence-specific binding to the 3' UTR of target mRNA transcripts.	0.009662	1.967	1.591	2.084	2.09	0.8442	0.6922	0.793	1.282
AT1G14205	6.42575	11.67	1.81613	Up	(U18-L8)	Member of the uL18 RNA-binding protein family. uL18 proteins share a short structurally conserved domain that binds the 5S rRNA and allow its incorporation into ribosomes. Essential for the splicing of the first intron of rps12 in plastid.	0.009703	8.445	6.374	6.257	4.627	10.9	11.55	11.33	12.9
ATMG01360	21.565	37.07	1.71899	Up	CYTOCHROME OXIDASE (COX1)	cytochrome c oxidase subunit 1	0.009721	18.78	23.44	24.23	19.81	33.13	27.65	30.55	56.95
AT4G26440	7.033	4.24575	0.60369	Down	WRKY DNA-BINDING PROTEIN 34 (WRKY34)	member of WRKY Transcription Factor; Group I	0.009744	7.18	6.069	7.238	7.645	4.29	4.255	4.558	3.88
ATCG01070	3.4875	9.63225	2.76194	Up	(NDHE)	NADH dehydrogenase ND4L	0.009748	2.435	4.779	3.031	3.705	7.386	7.232	5.121	18.79
AT1G18570	0.19795	0.562675	2.84251	Up	MYB DOMAIN PROTEIN 51 (MYB51)	Encodes a member of the R2R3-MYB transcription family. Involved in indole glucosinolate biosynthesis. The mRNA is cell-to-cell mobile.	0.009748	0.2926	0.2136	0.1454	0.1402	0.3244	0.569	0.5401	0.8172
AT2G25450	11.2153	17.3475	1.54678	Up	GLUCOSINOLATE HYDROXYLASE (GSL-OH)	Encodes a 2-oxoacid-dependent dioxygenase involved in the production of 2-hydroxybut-3-enyl glucosinolate.	0.009748	11.42	9.851	12.11	11.48	20.85	17.57	14.91	16.06
AT3G01270	177	82.83	0.467966	Down		Pectate lyase family protein;(source:Araport11)	0.009752	133.4	194.1	219.3	161.2	153.2	60.32	66.48	51.32
AT4G01480	119.243	70.045	0.587416	Down	PYROPHOSPHORYLASE 5 (PPa5)	Encodes a protein that might have inorganic pyrophosphatase activity.	0.009752	91.57	138.5	121.4	125.5	92.43	74.35	66.65	46.75
AT3G16810	21.315	31.8375	1.49367	Up	PUMILIO 24 (PUM24)	Encodes a member of the Arabidopsis Pumilio (APUM) proteins containing PUF domain (eight repeats of approximately 36 amino acids each). PUF proteins regulate both mRNA stability and translation through sequence-specific binding to the 3' UTR of target mRNA transcripts.	0.009756	23.57	24.75	14.92	22.02	27.14	31.55	30.58	38.08
AT4G17500	1.43875	3.17575	2.2073	Up	ETHYLENE RESPONSIVE ELEMENT BINDING FACTOR 1 (ERF-1)	Encodes a member of the ERF (ethylene response factor) subfamily B-3 of ERF/AP2 transcription factor family (ATERF-1). The protein contains one AP2 domain. There are 18 members in this subfamily including ATERF-1, ATERF-2, AND ATERF-5. The mRNA is cell-to-cell mobile.	0.009756	1.393	1.209	1.474	1.679	2.138	2.958	2.771	4.836
AT2G25890	25.79	12.7562	0.49462	Down		Oleosin family protein;(source:Araport11)	0.009848	17.4	32.1	26.99	26.67	18.68	12.52	13.08	6.745
AT5G46230	15.73	7.848	0.498919	Down		hypothetical protein (Protein of unknown function, DUF538);(source:Araport11)	0.009921	14.66	19.1	11.56	17.6	10.5	8.853	7.589	4.45
AT2G05642	1.0765	0.5055	0.469577	Down		Nucleic acid-binding, OB-fold-like protein;(source:Araport11)	0.01001	1.066	1.128	1.108	1.004	0.535	0.479	0.4823	0.5257
AT1G30040	9.319	14.4925	1.55516	Up	GIBBERELLIN 2-OXIDASE (GA2OX2)	Encodes a gibberellin 2-oxidase that acts on C-19 gibberellins. AtGA2OX2 expression is responsive to cytokinin and KNOX activities.	0.01006	10.36	9.543	8.929	8.444	11.98	14	13.45	18.54
AT3G14940	28.8325	19.415	0.673372	Down	PHOSPHOENOLPYRUVATE CARBOXYLASE 3 (PPC3)	Encodes a cytosolic phosphoenolpyruvate carboxylase (PEPC) that has activity when expressed in E.coli. Its mRNA is most abundantly expressed in roots and siliques. PPC3 belongs to the plant-type PEPC family. It can form an enzymatically active complex with a castor bean ortholog of PPC4, which encodes a bacterial-type PEPC. The mRNA is cell-to-cell mobile.	0.01011	30.57	31.2	28.44	25.12	20.13	16.74	20.58	20.21
AT5G50940	9.358	5.48225	0.585836	Down		RNA-binding KH domain-containing protein;(source:Araport11)	0.01015	10.26	8.217	10.31	8.645	6.038	5.761	5.065	5.065
AT2G28000	190.475	277.95	1.45925	Up	CHAPERONIN-60ALPHA (CPN60A)	Encodes chaperonin-60 alpha, a molecular chaperone involved in Rubisco folding. Mutants display aberrant chloroplast and embryo development. The mRNA is cell-to-cell mobile.	0.01017	213.6	190.7	155.4	202.2	240.6	277.8	279.1	314.3
AT1G01440	8.47725	12.4275	1.46598	Up		hypothetical protein (DUF3133);(source:Araport11)	0.01017	9.383	9.024	7.383	8.119	11.63	11.21	12.16	14.71
AT3G13850	17.8725	6.888	0.385397	Down	LOB DOMAIN-CONTAINING PROTEIN 22 (LBD22)	LOB domain-containing protein 22;(source:Araport11)	0.01017	9.98	16.05	32.83	12.63	11.45	6.494	6.219	3.389
AT1G15950	88.89	60.415	0.67966	Down	CINNAMOYL COA REDUCTASE 1 (CCR1)	Encodes a cinnamoyl CoA reductase. Involved in lignin biosynthesis. The mRNA is cell-to-cell mobile.	0.01017	93.88	89.02	71.96	100.7	59.84	67.16	58.61	56.05
AT1G20925	1.96175	0.871025	0.444004	Down	PIN-LIKES 1 (PILS1)	Member of family of proteins that are similar to PIN auxin transporter.	0.01017	1.477	2.643	2.016	1.711	0.9075	0.6139	0.9377	1.025
AT5G19600	17.085	7.55	0.441908	Down	SULFATE TRANSPORTER 3;5 (SULTR3;5)	Encodes sulfate transporter Sultr3;5.	0.01017	10.03	22.29	18.81	17.21	13.95	4.95	6.615	4.685
AT1G72010	5.611	8.7925	1.56701	Up	TCP DOMAIN PROTEIN 22 (TCP22)	Modulates GA-dependent stamen filament elongation by direct activation of SAUR63 subfamily genes through conserved target sites in their promoters.	0.01017	6.357	6.296	3.797	5.994	8.788	8.373	9.045	8.964
AT1G18460	12.265	18.255	1.48838	Up	(ALPHA/BETA-HYDROLASE)	Alpha/beta hydrolase	0.01017	13.62	14.14	10.79	10.51	16.13	16.52	18.29	22.08
AT4G25040	41.565	16.986	0.408661	Down	CASP-LIKE PROTEIN 1F1 (CASPL1F1)	Uncharacterized protein family (UPF0497);(source:Araport11)	0.01017	15.35	34.6	64.14	52.17	24.78	16.03	17.25	9.884
AT3G14390	27.9675	39.89	1.4263	Up	MESO-DIAMINOPIMELATE DECARBOXYLASE 1 (DAPDC1)	Meso-diaminopimelate decarboxylase which catalyzes the decarboxylation of mesodiaminopimelate, the final reaction in the diaminopimelate L-lysine biosynthetic pathway.	0.01019	27.98	31.07	23.5	29.32	40.47	40.08	43.83	35.18
AT5G38070	16.685	9.64175	0.577869	Down		RING/FYVE/PHD zinc finger superfamily protein;(source:Araport11)	0.01019	13.46	17.95	16.84	18.49	11.73	10.03	9.836	6.971
ATMG00070	16.4675	33.5475	2.03719	Up	NADH DEHYDROGENASE SUBUNIT 9 (NAD9)	NADH dehydrogenase subunit 9	0.01024	14.66	18.23	17.19	15.79	26.99	21.12	23.35	62.73
AT2G41445	8.30075	4.5725	0.550854	Down		agamous-like MADS-box protein;(source:Araport11)	0.01024	7.947	8.758	8.65	7.848	4.29	4.804	4.268	4.928
AT3G11964	14.3693	24.8575	1.72991	Up	RIBOSOMAL RNA PROCESSING 5 (RRP5)	Encodes a nucleolar protein that is a ribosome biogenesis co-factor. Mutants display aberrant RNA processing and female gametophyte development.	0.01024	15.15	16.15	9.667	16.51	17.77	20.98	20.27	40.41
AT1G44100	24.895	15.3225	0.615485	Down	AMINO ACID PERMEASE 5 (AAP5)	amino acid permease 5	0.01024	21.96	21.78	29.25	26.59	17.41	18.07	12.76	13.05
AT5G15550	11.0045	17.0725	1.55141	Up	ARABIDOPSIS THALIANA PESCADILLO ORTHOLOG (ATPEP2)	Transducin/WD40 repeat-like superfamily protein;(source:Araport11)	0.01032	11.44	12.47	8.128	11.98	13.74	15.74	16.34	22.47
AT5G58570	10.7018	5.2695	0.492396	Down		transmembrane protein;(source:Araport11)	0.01037	8.957	10.31	11.68	11.86	7.021	6.163	4.543	3.351
AT3G28630	2.0125	0.751675	0.373503	Down	CROLIN 1 (CROLIN1)	actin cross-linking protein, putative (DUF569);(source:Araport11)	0.01038	1.925	1.965	2.945	1.215	1.155	0.8684	0.5748	0.4085
AT1G69070	9.571	16.36	1.70933	Up		nucleolar-like protein;(source:Araport11)	0.01046	10.44	10.41	7.224	10.21	12.58	13.27	13.17	26.42
AT3G18880	11.4097	6.25725	0.548413	Down		Nucleic acid-binding, OB-fold-like protein;(source:Araport11)	0.01046	11.03	11.07	9.769	13.77	4.991	6.493	5.861	7.684
AT5G24655	1.18863	0.377275	0.317405	Down	RESPONSE TO LOW SULFUR 4 (LSU4)	response to low sulfur 4;(source:Araport11)	0.01046	1.314	0.8055	1.401	1.234	0.3021	0.7025	0.2341	0.2704
AT1G02965	0.7128	0.159015	0.223085	Down		hypothetical protein;(source:Araport11)	0.01046	0.6489	0.9728	0.4251	0.8044	0.1216	0.2743	0.1676	0.07256
AT3G62960	5.82925	2.42175	0.415448	Down	(ROXY8)	Encodes a member of the CC-type glutaredoxin (ROXY) family that has been shown to interact with the transcription factor TGA2.	0.01047	4.576	5.042	5.798	7.901	2.611	3.816	2.048	1.212
AT5G06320	6.15675	11.2035	1.81971	Up	NDR1/HIN1-LIKE 3 (NHL3)	encodes a protein whose sequence is similar to tobacco hairpin-induced gene (HIN1) and Arabidopsis non-race specific disease resistance gene (NDR1). Expression of this gene is induced by cucumber mosaic virus, spermine and Pseudomonas syringae pv. tomato DC3000. The gene product is localized to the plasma membrane.	0.01053	5.47	6.21	7.258	5.689	7.414	15.18	10.91	11.31
AT2G34820	6.9335	3.13475	0.452117	Down		basic helix-loop-helix (bHLH) DNA-binding superfamily protein;(source:Araport11)	0.01053	7.122	5.497	9.143	5.972	2.694	4.127	4.202	1.516
AT5G39493	40.13	16.1088	0.401414	Down	S-PROTEIN HOMOLOG 15 (SPH15)	SPH family protein containing 112 residues, eight beta strands and connecting loops.	0.01053	22.92	45.92	48.25	43.43	26.28	17.82	14.91	5.425
AT3G55160	4.954	8.07525	1.63005	Up	THYROID ADENOMA ASSOCIATED (THADA)	THADA is an orphan gene in Arabidopsis thaliana. It is the only DUF2428 domain containing protein in the genome.	0.01055	5.044	5.539	4.35	4.883	6.358	6.726	6.857	12.36
AT2G47490	24.38	15.42	0.632486	Down	NAD+ TRANSPORTER 1 (NDT1)	Encodes a chloroplast-localized NAD+ transporter that transports NAD+ in a counter exchange mode with ADP and AMP in vitro.	0.01055	23.34	25.49	24.57	24.12	17.11	18.21	14.96	11.4
AT5G19230	0.211773	0.8177	3.86122	Up		Glycoprotein membrane precursor GPI-anchored;(source:Araport11)	0.01056	0.2171	0.06399	0.4259	0.1401	0.504	0.9336	1.017	0.8162
AT1G01460	2.6827	0.63835	0.237951	Down	(PIPK11)	Type I phosphatidylinositol-4-phosphate 5-kinase, subfamily A.	0.01057	3.035	1.324	5.558	0.8138	1.258	0.6012	0.2048	0.4894
AT5G63130	4.38125	2.1735	0.496091	Down		Octicosapeptide/Phox/Bem1p family protein;(source:Araport11)	0.01057	4.215	4.291	4.027	4.992	2.625	2.328	2.295	1.446
AT2G01950	11.1425	16.5775	1.48777	Up	BRI1-LIKE 2 (BRL2)	Encodes a leucine rich repeat receptor kinase and associated with provascular/procambial cells. Similar to BRI, brassinosteroid receptor protein.	0.01057	10.58	11.81	11.69	10.49	17.79	14.21	15.12	19.19
AT4G01037	6.98325	12.038	1.72384	Up	WHAT'S THIS FACTOR? (WTF1)	Ubiquitin carboxyl-terminal hydrolase family protein;(source:Araport11)	0.01076	7.487	7.295	5.089	8.062	8.322	10.79	10.26	18.78
AT4G20130	19.9875	29.08	1.45491	Up	PLASTID TRANSCRIPTIONALLY ACTIVE 14 (PTAC14)	PEP complex component.	0.01084	23.84	21.08	18	17.03	26.76	29.46	28.6	31.5
AT3G20190	1.23485	0.415525	0.336498	Down	POLLEN RECEPTOR LIKE KINASE 4 (PRK4)	Leucine-rich repeat protein kinase family protein;(source:Araport11)	0.01084	1.598	1.18	1.662	0.4994	0.6899	0.4579	0.2798	0.2345
AT3G16070	5.14475	2.2415	0.435687	Down		LOW protein: ATP-dependent RNA helicase-like protein;(source:Araport11)	0.01084	4.994	3.656	6.566	5.363	2.67	2.369	2.125	1.802
AT1G50840	6.192	10.159	1.64067	Up	POLYMERASE GAMMA 2 (POLGAMMA2)	DNA Polymerase gamma2. Dual targeting to mitochondria and plastids due to alternative translation initiation.	0.01086	6.214	6.964	4.824	6.766	8.335	7.955	8.946	15.4
AT1G06190	13.7222	21.83	1.59085	Up	RHO-N 1 (RHON1)	Encodes a novel ribonucleic acid-binding protein that interacts with the endonuclease RNase E and supports its function in processing plastid ribonucleic acids.	0.01086	17.2	15.27	8.719	13.7	17.58	20.02	21.67	28.05
AT3G28830	167.225	88.33	0.52821	Down		mucin-like protein, putative (DUF1216);(source:Araport11)	0.01086	133.4	183.6	233.2	118.7	131.3	75.52	79.86	66.64
AT3G59210	3.69625	6.04275	1.63483	Up		F-box/RNI-like superfamily protein;(source:Araport11)	0.01086	3.456	4.396	2.479	4.454	6.245	5.935	6.402	5.589
AT5G04895	2.63	4.392	1.66996	Up	ABA OVERLY SENSITIVE 6 (ABO6)	DEA(D/H)-box RNA helicase family protein;(source:Araport11)	0.01086	3.067	3.061	2.115	2.277	3.465	4.224	3.667	6.212
AT2G15555	5.019	2.135	0.425384	Down		other_RNA;(source:Araport11)	0.01087	3.907	6.043	6.082	4.044	3.317	2.382	1.713	1.128
AT1G64370	17.8945	7.466	0.417223	Down	PHLOEM ASSOCIATED RNA CHAPERONE-LIKE (PARCL)	filaggrin-like protein;(source:Araport11)	0.01099	9.668	17.62	26.27	18.02	12.24	7.094	6.943	3.587
AT2G35700	2.748	1.06315	0.386881	Down	ERF FAMILY PROTEIN 38 (ERF38)	encodes a member of the DREB subfamily A-4 of ERF/AP2 transcription factor family. The protein contains one AP2 domain. There are 17 members in this subfamily including TINY. Thought to be involved in secondary cell wall metabolism.	0.01099	2.075	2.47	3.362	3.085	1.559	1.089	0.998	0.6066
AT5G46380	3.892	1.97075	0.506359	Down		Serine/Threonine-kinase, putative (DUF1296);(source:Araport11)	0.01103	4.836	3.292	4.859	2.581	1.721	1.732	2.071	2.359
AT5G62280	1.81775	3.39675	1.86866	Up		DUF1442 family protein (DUF1442);(source:Araport11)	0.01104	1.978	2.045	1.524	1.724	3.404	2.973	3.595	3.615
AT3G59020	38.7925	57.3425	1.47819	Up		ARM repeat superfamily protein;(source:Araport11)	0.01113	41.58	41.86	41.68	30.05	58.46	53.67	60.06	57.18
AT1G33600	16.635	27.9225	1.67854	Up		Leucine-rich repeat (LRR) family protein;(source:Araport11)	0.01118	14.6	15.18	23.34	13.42	24.34	28.38	28.91	30.06
AT3G21945	10.2665	3.16805	0.308581	Down		cysteine-rich repeat secretory protein;(source:Araport11)	0.01126	5.542	10.17	16.5	8.854	4.988	3.403	3.681	0.6002
AT3G07650	17.075	25.215	1.47672	Up	CONSTANS-LIKE 9 (COL9)	This gene belongs to the CO (CONSTANS) gene family. This gene family is divided in three subgroups: groups III, to which COL9 belongs, is characterised by one B-box (supposed to regulate protein-protein interactions) and a second diverged zinc finger. COL9 downregulates expression of CO (CONSTANS) as well as FT and SOC1 which are known regulatory targets of CO. The mRNA is cell-to-cell mobile.	0.01127	19.28	16.19	17.14	15.69	23.51	25.91	29.24	22.2
AT3G23350	1.30725	0.396875	0.303595	Down		ENTH/VHS family protein;(source:Araport11)	0.01127	1.239	1.604	0.964	1.422	0.8671	0.2378	0.3148	0.1678
AT5G13350	11.1143	5.3765	0.483748	Down		Auxin-responsive GH3 family protein;(source:Araport11)	0.01136	6.247	14.66	12.94	10.61	8.155	3.982	5.558	3.811
AT5G35090	7.407	3.14175	0.42416	Down		hypothetical protein;(source:Araport11)	0.0114	7.031	5.194	11.61	5.793	3.818	3.874	3.035	1.84
ATCG00290	26.8425	66.57	2.48002	Up	(TRNS.2)	tRNA-Ser	0.01144	24.74	31.22	31.29	20.12	45.68	38.63	48.87	133.1
AT2G22860	11.961	2.07463	0.173449	Down	PHYTOSULFOKINE 2 PRECURSOR (PSK2)	Phytosulfokine 2 precursor, coding for a unique plant peptide growth factor. The mRNA is cell-to-cell mobile.	0.01145	6.315	5.376	32.07	4.083	3.754	3.636	0.4519	0.4566
AT1G02730	14.0452	23.27	1.65679	Up	CELLULOSE SYNTHASE-LIKE D5 (CSLD5)	Encodes a gene similar to cellulose synthase. Knock-out mutant has reduced growth, reduced xylan level and reduced xylan synthase activity in stems.It's expression is cell cycle dependent and it appears to function in cell plate formation.	0.01145	16.01	16.63	8.851	14.69	17.75	19.31	21.14	34.88
AT3G57660	18.9625	30.57	1.61213	Up	NUCLEAR RNA POLYMERASE A1 (NRPA1)	Encodes a subunit of RNA polymerase I (aka RNA polymerase A). The mRNA is cell-to-cell mobile.	0.01149	19.75	21.37	13.8	20.93	24.69	26.53	24.75	46.31
AT2G24762	2.213	4.6865	2.11771	Up	GLUTAMINE DUMPER 4 (GDU4)	Encodes a member of the GDU (glutamine dumper) family proteins involved in amino acid export: At4g31730 (GDU1), At4g25760 (GDU2), At5g57685 (GDU3), At2g24762 (GDU4), At5g24920 (GDU5), At3g30725 (GDU6) and At5g38770 (GDU7).	0.01153	2.439	2.581	1.232	2.6	4.481	3.006	5.031	6.228
AT1G72320	11.782	17.865	1.5163	Up	PUMILIO 23 (PUM23)	Encodes a member of the Arabidopsis Pumilio (APUM) proteins containing PUF domain (eight repeats of approximately 36 amino acids each). PUF proteins regulate both mRNA stability and translation through sequence-specific binding to the 3' UTR of target mRNA transcripts.	0.01158	12.41	13.67	9.588	11.46	15.09	15.55	16.92	23.9
AT1G17710	21.04	12.905	0.613356	Down	PHOSPHOETHANOLAMINE/PHOSPHOCHOLINE PHOSPHATASE 1 (PEPC1)	Encodes a phosphoethanolamine/phosphocholine phosphatase. It is likely to be involved in the liberation of inorganic phosphate from intracellular sources. Expression is upregulated in the shoot of cax1/cax3 mutant.	0.01159	20.32	20.33	21.52	21.99	11.74	11.72	17.76	10.4
AT2G16950	23.4775	33.325	1.41944	Up	TRANSPORTIN 1 (TRN1)	TRN1 is an importin beta protein that functions as a nuclear import receptor for AtGRP7 and in interacts with AGO1 to affect miRNA loading.	0.0116	24.16	26.8	20.5	22.45	34.13	28.94	32.11	38.12
AT3G47660	0.98275	0.4082	0.415365	Down		Regulator of chromosome condensation (RCC1) family protein;(source:Araport11)	0.01167	0.7284	1.035	1.213	0.9546	0.6516	0.3165	0.3545	0.3102
AT3G57060	9.361	14.9475	1.59678	Up	(CAP-D2)	binding protein;(source:Araport11)	0.01168	9.62	11.07	7.345	9.409	12.33	11.59	13.93	21.94
AT4G11211	130.475	81.145	0.62192	Down		hypothetical protein;(source:Araport11)	0.01168	109.8	120.7	143.3	148.1	90.46	94.06	79.23	60.83
AT1G04450	16.47	7	0.425015	Down	ROP-INTERACTIVE CRIB MOTIF-CONTAINING PROTEIN 3 (RIC3)	Encodes a member of a novel protein family that contains contain a CRIB (for Cdc42/Rac-interactive binding) motif required for their specific interaction with GTP-bound Rop1 (plant-specific Rho GTPase). It interacts with Rop1 and is involved in pollen tube growth and function, and exocytosis in the pollen tube tip. The protein most similar to RIC1 (family subgroup III). Gene is expressed predomin…	0.01168	12.03	17.29	23.39	13.17	11.85	6.113	7.096	2.941
AT3G18080	101.995	147.675	1.44787	Up	B-S GLUCOSIDASE 44 (BGLU44)	B-S glucosidase 44;(source:Araport11)	0.01172	123.7	115.1	82.55	86.63	156.1	139.9	146.3	148.4
AT3G01470	40.3825	25.3675	0.628181	Down	HOMEOBOX 1 (HB-1)	Encodes a homeodomain leucine zipper class I (HD-Zip I) transcriptional activator involved in leaf and hypocotyl development. Its promoter is bound by PIF1 which likely regulates its expression. Its translation is regulated by a conserved upstream ORF (CPuORF33).	0.01172	37.83	37.8	50.13	35.77	27.18	28.62	24.75	20.92
AT3G01472	40.3825	25.3675	0.628181	Down			0.01172	37.83	37.8	50.13	35.77	27.18	28.62	24.75	20.92
AT5G20920	55.9625	83.965	1.50038	Up	EUKARYOTIC TRANSLATION INITIATION FACTOR 2 BETA SUBUNIT (EIF2 BETA)	protein synthesis initiation factor eIF2 beta	0.01179	62.39	65.69	36.52	59.25	72.11	80.82	79.43	103.5
AT4G13700	11.1322	6.93125	0.622628	Down	PURPLE ACID PHOSPHATASE 23 (PAP23)	purple acid phosphatase 23;(source:Araport11)	0.0118	10.33	9.869	11.24	13.09	6.163	6.754	7.608	7.2
AT1G35490	48.8725	17.8145	0.36451	Down		bZIP family transcription factor;(source:Araport11)	0.01182	43.18	42.37	68.4	41.54	39.45	14.74	11	6.068
AT1G29430	3.18725	1.43802	0.45118	Down	SMALL AUXIN UPREGULATED RNA 62 (SAUR62)	SAUR762 expression is induced during pollination and expressed in pollen tubes. SAUR62 likely functions in translation of proteins required for pollen tube development/function.	0.01182	3.238	3.365	3.077	3.069	1.792	1.76	1.269	0.9311
AT3G13230	84.28	121.475	1.44133	Up		RNA-binding KH domain-containing protein;(source:Araport11)	0.01182	75.84	86.02	89.46	85.8	119.1	133.1	124.6	109.1
AT2G31810	11.4587	16.975	1.4814	Up	ACETOLACTATE SYNTHASE SMALL SUBUNIT 1 (AHASS1)	ACT domain-containing small subunit of acetolactate synthase protein;(source:Araport11)	0.01188	14.15	12.76	9.131	9.794	15.02	16.8	17.19	18.89
AT3G01240	86.0125	31.4175	0.365267	Down		splicing regulatory glutamine/lysine-rich-like protein;(source:Araport11)	0.01188	61.75	70.45	130.9	80.95	67.29	26.13	21.26	10.99
AT3G06430	7.99275	11.6725	1.46039	Up	PENTATRICOPEPTIDE REPEAT 2 (PPR2)	Encodes PPR2, a pentatricopeptide repeat protein. Binds to plastid 23S rRNA and plays an important role in the first mitotic division during gametogenesis and in cell proliferation during embryogenesis.	0.01189	8.94	8.73	6.785	7.516	10.65	11.5	12.07	12.47
AT1G26610	1.32305	0.570775	0.431408	Down		C2H2-like zinc finger protein;(source:Araport11)	0.01189	1.178	1.61	0.9162	1.588	0.5465	0.6525	0.7197	0.3644
AT2G42005	1.907	0.856275	0.449017	Down	(ATAVT3B)	Transmembrane amino acid transporter family protein;(source:Araport11)	0.01194	1.687	2.079	2.197	1.665	1.141	0.8201	0.8769	0.5871
AT1G69960	41.5825	27.58	0.66326	Down	SERINE/THREONINE PROTEIN PHOSPHATASE 2A (PP2A)	type 2A serine/threonine protein phosphatase (PP2A) mRNA, positive regulators of SPCH and thus stomatal production.	0.01196	41.44	37.61	40.93	46.35	26.21	32.51	27.65	23.95
AT2G35120	60.4325	40.755	0.674389	Down		Single hybrid motif superfamily protein;(source:Araport11)	0.01196	60.36	62.8	49.3	69.27	37.86	44.31	40.47	40.38
AT5G42340	1.2874	0.36685	0.284954	Down	PLANT U-BOX 15 (PUB15)	Plant U-box type E3 ubiquitin ligase (PUB).	0.01196	1.557	1.505	1.719	0.3686	0.7105	0.3561	0.1496	0.2512
AT5G24740	13.6525	21.1125	1.54642	Up	SHRUBBY (SHBY)	Encodes a vacuolar sorting protein that interacts with the plant-specific GRAS family transcription factor SHORT-ROOT and acts in a pathway that controls root growth and radial patterning. It provides a connections between gibberellic acid, SHR and PLT signaling in the root.	0.01196	15.32	15.98	11.02	12.29	19.32	16.57	18.71	29.85
AT5G22090	17.1075	10.8403	0.633655	Down	ENHANCER OF ABA CO-RECEPTOR 1 (EAR1)	EAR1 is a negative regulator of ABA signaling that enhances the activity of all six clade A PP2Cs (ABI1, ABI2, HAB1, HAB2, AHG1, AHG3) by interacting with and releasing the N-terminal autoinhibition of these proteins. EAR1 indirectly affects OST1 activity through enhancing ABI1 activity. The EAR1 141-287 fragment is sufficient for the functioning of EAR1 in ABA responses; the 131-248 region harbo…	0.01197	16.73	19.6	18.44	13.66	11.82	12.02	8.291	11.23
AT4G26390	9.94775	5.76575	0.579603	Down		Pyruvate kinase family protein;(source:Araport11)	0.01202	8.611	12.22	8.06	10.9	6.506	5.311	6.888	4.358
AT3G42725	3.56375	7.2325	2.02946	Up		Putative membrane lipoprotein;(source:Araport11)	0.01212	3.568	3.336	4.888	2.463	6.576	8.88	7.897	5.577
AT1G30960	3.52775	5.75775	1.63213	Up	(ERA-2)	Ortholog of ERA (E. coli RAS-like protein)-related GTPase (ERG). Mitochondrial protein that associates with 18sRNA. Heterozygous mutants segregate for embryo lethality inherited as a sporphytic maternal effect. Increased ROS in the mutant ovule suggests a heritable mitochondrial defect results in lethality.	0.01212	3.371	3.746	3.209	3.785	5.475	5.152	5.942	6.462
AT1G54240	7.78275	4.2005	0.539719	Down		winged-helix DNA-binding transcription factor family protein;(source:Araport11)	0.01212	9.9	7.721	6.365	7.145	4.879	3.977	4.85	3.096
AT1G71850	3.1345	5.1955	1.65752	Up		Ubiquitin carboxyl-terminal hydrolase family protein;(source:Araport11)	0.01218	3.538	3.286	2.364	3.35	4.452	5.143	5.505	5.682
AT1G76830	1.17158	0.49495	0.422465	Down		F-box and associated interaction domains-containing protein;(source:Araport11)	0.01218	1.306	1.259	1.171	0.9503	0.6018	0.4491	0.5487	0.3802
AT5G09590	28.6825	42.92	1.49638	Up	MITOCHONDRIAL HSO70 2 (MTHSC70-2)	heat shock protein 70 (Hsc70-5); nuclear	0.01224	29.4	35.15	22.95	27.23	39.18	34.13	42.27	56.1
AT1G15390	28.05	40.265	1.43547	Up	PEPTIDE DEFORMYLASE 1A (PDF1A)	encodes a peptide deformylase-like protein. Removes N-formyl groups, a prerequisite for the action of methionine aminopeptidase during protein synthesis. Targeted to mitochondria. Requires Zn for catalysis.	0.01227	32.14	27.2	24.25	28.61	36.96	38.71	42.56	42.83
AT2G20450	54.75	78.12	1.42685	Up		Ribosomal protein L14;(source:Araport11)	0.01233	62.29	56.47	45.65	54.59	69.3	84.65	76.23	82.3
AT1G62750	34.2	49.49	1.44708	Up	SNOWY COTYLEDON 1 (SCO1)	Nuclear encoded protein consists of the five domains conserved in EF-G proteins, with two GTP-binding sites in the first domain, and an additional transit peptide at the N-terminus. Localized in chloroplasts. Point mutation results in a delay in the onset of germination. At early developmental stage embryos still contain undifferentiated proplastids. The greening of cotyledons is severely impaire…	0.01239	40.03	39.11	26.72	30.94	47.07	43.6	47.94	59.35
AT2G17500	10.9923	5.76125	0.524119	Down	PIN-LIKES 5 (PILS5)	Auxin efflux carrier family protein;(source:Araport11)	0.01256	8.95	9.128	16.58	9.311	6.819	7.17	4.93	4.126
AT5G26700	179.365	25.213	0.140568	Down		RmlC-like cupins superfamily protein;(source:Araport11)	0.0126	122.1	68.02	490	37.34	62.79	30.28	5.534	2.248
AT1G06260	227.15	143.75	0.632842	Down		Cysteine peptidase,activity detected in leaf and flower.	0.01267	226	232.4	255.5	194.7	137.4	121	190.7	125.9
ATCG00950	1.15617	2.55175	2.20706	Up	RIBOSOMAL RNA23S (RRN23S.1)	chloroplast-encoded 23S ribosomal RNA	0.0127	0.8837	1.122	1.582	1.037	2.328	1.718	1.855	4.306
AT5G48210	330.35	192.325	0.582186	Down		prolamin-like protein (DUF1278);(source:Araport11)	0.0127	339.5	241.9	440	300	170.8	227.1	231.4	140
AT1G65140	6.05975	3.31275	0.546681	Down		Ubiquitin carboxyl-terminal hydrolase family protein;(source:Araport11)	0.0127	7.121	6.499	5.614	5.005	3.273	2.803	3.393	3.782
AT5G13980	33.5675	49.7025	1.48067	Up		Glycosyl hydrolase family 38 protein;(source:Araport11)	0.0127	38.69	34.87	27.53	33.18	41.12	43.8	47.51	66.38
AT5G54720	0.0861275	0.621475	7.21576	Up		Ankyrin repeat family protein;(source:Araport11)	0.0127	0.07309	0.1867	0.08472	0	0.2626	0.1776	0.4477	1.598
AT3G48870	40.9475	61.685	1.50644	Up	(HSP93-III)	Encodes a nuclear encoded protein with similarity to Clpa regulatory subunit of CLP protease complex. The protein is localized to the chloroplast stroma. May function redundantly with TIC complex in chloroplast protein import.	0.01271	47.81	45.46	28.78	41.74	54.31	53.12	57.71	81.6
AT3G28740	1.96475	3.404	1.73254	Up	CYTOCHROME P450, FAMILY 81, SUBFAMILY D, POLYPEPTIDE 11 (CYP81D11)	Encodes a member of the cytochrome p450 family. Expression is upregulated in response to cis-jasmonate treatment. Overexpression induces synthesis of volatile compounds that affect chemical ecology and insect interactions.	0.01273	2.026	2.037	1.699	2.097	3.519	3.374	3.175	3.548
AT3G56090	89.155	131.81	1.47844	Up	FERRITIN 3 (FER3)	Encodes FERRITIN 3, AtFER3. Ferritins are a class of 24-mer multi-meric proteins found in all kingdoms of life. Function as the main iron store in mammals. Evidence suggests that Arabidopsis ferritins are essential to protect cells against oxidative damage, but they do not constitute the major iron pool.	0.01274	94.57	88.63	82.12	91.3	120.5	149.2	158.5	99.04
AT4G05070	1.00453	2.6595	2.64752	Up	WOUND-INDUCED POLYPEPTIDE 2 (WIP2)	Member of the wound-induced polypeptide (WIP) family. Positively regulates plant resistance against Pst DC3000 by enhancing PTI responses.	0.01278	1.156	0.7719	0.9442	1.146	1.171	2.427	2.985	4.055
AT4G13370	5.19225	8.048	1.55	Up	CORTICAL MICROTUBULE DISORDERING3 (CORD3)	Member of a novel, plant specific family of microtubule associated proteins.	0.01278	4.645	5.884	5.23	5.01	7.794	6.552	8.34	9.506
AT5G02280	19.195	10.7658	0.560862	Down	(TRAPPC4)	Part of multi-protein complex, acting as guanine nucleotide exchange factors (GEFs) and possibly as tethers, regulating intracellular trafficking.	0.01279	18.76	18.58	19.14	20.3	13.5	11.97	10.99	6.603
AT2G15090	33.1875	49.2275	1.48331	Up	3-KETOACYL-COA SYNTHASE 8 (KCS8)	Encodes KCS8, a member of the 3-ketoacyl-CoA synthase family involved in the biosynthesis of VLCFA (very long chain fatty acids). The mRNA is cell-to-cell mobile.	0.01282	33.51	34.62	36.17	28.45	52.31	44.38	57.47	42.75
AT1G74470	57.95	81.6375	1.40876	Up		Encodes for a multifunctional protein with geranylgeranyl reductase activity shown to catalyze the reduction of prenylated geranylgeranyl-chlorophyll a to phytyl-chlorophyll a (chlorophyll a) and free geranylgeranyl pyrophosphate to phytyl pyrophosphate. The mRNA is cell-to-cell mobile.	0.01288	64.36	60.9	45.01	61.53	72.49	79.94	82.64	91.48
AT2G21237	2.407	1.06852	0.443924	Down		transmembrane protein;(source:Araport11)	0.01293	2.333	2.151	2.116	3.028	0.9913	0.9368	1.25	1.096
AT3G13470	25.93	40.7525	1.57164	Up	CHAPERONIN-60BETA2 (CPN60BETA2)	Encodes a subunit of chloroplasts chaperonins that are involved in mediating the folding of newly synthesized, translocated, or stress-denatured proteins. Cpn60 subunits are: Cpn60alpha1 (At2g28000), AtCpn60alpha2 (At5g18820), AtCpn60beta1 (At1g55490), AtCpn60beta2 (At3g13470), AtCpn60beta3 (At5g56500), AtCpn60beta4 (At1g26230).	0.01294	30.65	30.74	15.98	26.35	31.31	39.47	38.44	53.79
AT1G23060	1.80675	0.77335	0.428034	Down	MICROTUBULE DESTABILIZING PROTEIN 40 (MDP40)	hypothetical protein;(source:Araport11)	0.01298	2.257	1.46	1.576	1.934	1.02	1.006	0.6365	0.4309
AT2G48130	11.2012	6.29475	0.561969	Down	GLYCOSYLPHOSPHATIDYLINOSITOL-ANCHORED LIPID PROTEIN TRANSFER 15 (LTPG15)	Encodes a plasma membrane-localized glycosylphosphatidylinositol-anchored lipid transfer protein expressed in root endodermis and seed coats that is involved in very long chain fatty acid (and their derivatives) transport.	0.01301	12.62	10.11	12.85	9.225	4.768	6.574	6.694	7.143
AT1G10760	32.5725	48.52	1.4896	Up	STARCH EXCESS 1 (SEX1)	Encodes an α-glucan, water dikinase required for starch degradation. Involved in cold-induced freezing tolerance. Mutations that eliminate the GWD protein or affect the dikinase domain of the enzyme dramatically reduce both the amount of phosphate in the amylopectin and the rate of starch degradation. Mature leaves of these mutants accumulate amounts of starch up to seven times greater than those…	0.01301	33.06	38.56	27.68	30.99	45.42	37.97	47.47	63.22
AT3G10150	8.0175	4.86475	0.606766	Down	PURPLE ACID PHOSPHATASE 16 (PAP16)	purple acid phosphatase 16;(source:Araport11)	0.01308	8.689	8.241	7.583	7.557	5.388	4.894	4.799	4.378
ATMG01390	686.7	1359	1.97903	Up	(RRN18)	Mitochondrial 18S ribosomal RNA, which is a component of the 30S small subunit of mitochondrial ribosome. The rRNA is degraded by a polynucleotide phosphorylase-like protein (AtmtPNPase).	0.01308	613.1	822.7	617.8	693.2	1127	793.6	968.4	2547
AT4G20830	2.72575	4.44175	1.62955	Up	(ATBBE19)	Encodes an oligogalacturonide oxidase that inactivates the elicitor-active oligogalacturonides (OGs). It is involved in plant immunity. Overexpressing plants are more resistant to B. cinerea.	0.0131	2.817	3.148	2.299	2.639	4.461	4.925	4.204	4.177
AT1G26320	6.78675	3.19875	0.471323	Down		Zinc-binding dehydrogenase family protein;(source:Araport11)	0.0131	4.033	8.635	8.068	6.411	4.737	2.943	2.948	2.167
AT5G10740	7.59975	4.6955	0.617849	Down		Protein phosphatase 2C family protein;(source:Araport11)	0.01313	7.543	8.604	6.905	7.347	4.763	5.4	4.31	4.309
AT2G33670	3.389	1.6425	0.484656	Down	MILDEW RESISTANCE LOCUS O 5 (MLO5)	A member of a large family of seven-transmembrane domain proteins specific to plants, homologs of the barley mildew resistance locus o (MLO) protein. The Arabidopsis genome contains 15 genes encoding MLO proteins, with localization in plasma membrane. Phylogenetic analysis revealed four clades of closely-related AtMLO genes. ATMLO5 belongs to the clade III, with AtMLO7, AtMLO8, AtMLO9, and AtMLO1…	0.01324	2.867	3.577	4.701	2.411	1.994	1.425	1.791	1.36
AT4G09644	16.1075	7.047	0.437498	Down		Encodes a defensin-like (DEFL) family protein.	0.01328	10.6	21.41	18.17	14.25	9.831	5.542	7.83	4.985
AT1G01640	19.6225	11.506	0.586368	Down		Putative role in flower development. Comparison of SALK_011721C to Columbia wild type resulted in a trend toward earlier flowering in the mutant (P=0.1) (Stapleton and Woodruff 2009, personal communication).	0.0133	20.19	16.29	23.29	18.72	12.14	13.78	12.14	7.964
AT1G18370	13.2475	20.5175	1.54878	Up	HINKEL (HIK)	Encodes a kinesin HINKEL. Required for cytokinesis in pollen. Mutant has cytokinesis defects; seedling lethal.	0.01341	13.97	15.89	10.46	12.67	16.73	16.76	19.92	28.66
AT5G67220	13.6095	20.555	1.51034	Up		FMN-linked oxidoreductases superfamily protein;(source:Araport11)	0.01342	17.48	15.36	9.288	12.31	18.92	19.08	20.79	23.43
AT1G16910	0.175925	0.5845	3.32244	Up	LIGHT SENSITIVE HYPOCOTYLS 8 (LSH8)	LIGHT-DEPENDENT SHORT HYPOCOTYLS-like protein (DUF640);(source:Araport11)	0.01342	0.179	0.2286	0.121	0.1751	0.2786	0.5075	0.6312	0.9207
AT2G26700	2.166	3.6825	1.70014	Up	PINOID2 (PID2)	Member of AGC VIIIa Kinase gene family. Encodes PID2, a homolog of PID. Simultaneous disruption of PID(AT2G34650) and its 3 closest homologs (PID2/AT2G26700, WAG1/AT1G53700, and WAG2/AT3G14370) abolishes the formation of cotyledons.	0.01342	2.418	2.359	1.866	2.021	3.259	3.43	3.82	4.221
AT5G16540	82.665	54.0475	0.653814	Down	ZINC FINGER NUCLEASE 3 (ZFN3)	Encodes a zinc finger protein.	0.01365	91.41	76.94	84.24	78.07	60.86	61.87	53.32	40.14
AT1G22260	2.964	1.755	0.592105	Down	(ZYP1a)	One of two nearly identical proteins (ZYP1b) identified by similarity to transverse filament (TF) proteins. These proteins are involved in chromosome synapsis during meiosis I and localize to the synaptonemal complex (SC). Single mutants have reduced fertility and double mutants (induced by RNAi) have severely reduced fertility.	0.01367	2.787	3.237	2.867	2.965	1.808	1.944	1.788	1.48
AT1G50200	18.0025	28.355	1.57506	Up	ALANYL-TRNA SYNTHETASE (ALATS)	Alanyl-tRNA synthetase;(source:Araport11)	0.01371	19.23	20.57	14.67	17.54	23.25	22.74	24.84	42.59
AT3G14595	211.175	108.25	0.512608	Down		Ribosomal protein L18ae family;(source:Araport11)	0.01372	162.7	166.3	317.6	198.1	156.2	111.8	102.4	62.6
AT5G16620	70.975	102.49	1.44403	Up	TRANSLOCON AT THE INNER ENVELOPE MEMBRANE OF CHLOROPLASTS 40 (TIC40)	chloroplast protein import (Tic40)	0.01374	69.87	67.26	79.14	67.63	92.49	99.47	104.6	113.4
AT3G22660	11.62	17.085	1.47031	Up	(EBP2)	rRNA processing protein-like protein;(source:Araport11)	0.01374	11.48	12.83	9.31	12.86	15.39	18.61	16.09	18.25
AT5G14870	6.64075	3.54025	0.53311	Down	CYCLIC NUCLEOTIDE-GATED CHANNEL 18 (CNGC18)	Encodes a member of the cyclic nucleotide gated channel family that is asymmetrically localized to the plasma membrane at the growing tip of the pollen tube and is involved in pollen tube growth and pollen tube guidance to ovules. It likely directly transduces a cNMP signal into an ion flux that can produce a localized signal capable of regulating the pollen tip-growth machinery. Also functions a…	0.01379	5.836	7.086	8.843	4.798	5.034	3.251	3.099	2.777
AT5G10850	2.268	0.98115	0.432606	Down		transposable_element_gene;(source:Araport11);similar to nucleic acid binding / zinc ion binding [Arabidopsis thaliana] (TAIR:AT2G01050.1);(source:TAIR10)	0.0138	2.009	2.222	2.305	2.536	1.161	0.7048	1.153	0.9058
AT1G28335	8.7315	2.16045	0.247432	Down	LOW-MOLECULAR-WEIGHT CYSTEINE-RICH 31 (LCR31)	Encodes a member of a family of small,secreted, cysteine rich protein with sequence similarity to the PCP (pollen coat protein) gene family.	0.01389	9.573	7.535	12.24	5.578	4.489	2.952	1.052	0.1488
AT2G02140	46.885	7.03685	0.150087	Down	LOW-MOLECULAR-WEIGHT CYSTEINE-RICH 72 (LCR72)	Predicted to encode a PR (pathogenesis-related) protein. Belongs to the plant defensin (PDF) family with the following members: At1g75830/PDF1.1, At5g44420/PDF1.2a, At2g26020/PDF1.2b, At5g44430/PDF1.2c, At2g26010/PDF1.3, At1g19610/PDF1.4, At1g55010/PDF1.5, At2g02120/PDF2.1, At2g02100/PDF2.2, At2g02130/PDF2.3, At1g61070/PDF2.4, At5g63660/PDF2.5, At2g02140/PDF2.6, At5g38330/PDF3.1 and At4g30070/PDF…	0.01389	50.05	29.75	90.63	17.11	17.81	9.173	0.6957	0.4687
AT4G00040	82.51	55.7175	0.675282	Down		Chalcone and stilbene synthase family protein;(source:Araport11)	0.01389	98.58	80.21	71.3	79.95	58.95	52.11	63.27	48.54
AT3G27740	88.0725	122.375	1.38948	Up	CARBAMOYL PHOSPHATE SYNTHETASE A (CARA)	Encodes carbamoyl phosphate synthetase (CPS) small subunit (carA), also named as VEN6. Heterologous expression of the Arabidopsis VEN3 and VEN6 genes in a CPS-deficient Escherichia coli strain fully restored bacterial growth in minimal medium, demonstrating the enzymatic activity of the VEN3 and VEN6 proteins.	0.01393	97.96	94.2	76.6	83.53	120.7	130.1	124.2	114.5
AT1G11250	1.37538	0.414525	0.301391	Down	SYNTAXIN OF PLANTS 125 (SYP125)	member of SYP12 Gene Family	0.01397	2.261	1.336	1.337	0.5675	0.4641	0.6728	0.1256	0.3956
AT1G73325	11.1977	5.13275	0.458373	Down		Kunitz family trypsin and protease inhibitor protein;(source:Araport11)	0.01409	12.37	12.04	9.871	10.51	6.816	5.162	6.537	2.016
AT3G15140	11.109	16.3175	1.46885	Up	ENHANCER OF RNAI (ERI-1)	ERI (At3g15140) encodes a protein of 337 amino acids of the ribonuclease H-like superfamily. The protein contains both DEDDh and SAP domains.The first exon contains a TCT-microsatellite structure (starting 226 bp after ATG) that, based on sequence complementarity, is a miR5021-cleavage target site. ERI is predicted to function as an siRNA exonuclease. Overexpression leads to increased post transc…	0.01409	13.22	11.98	8.566	10.67	14.92	15.75	17.03	17.57
AT2G30680	7.7115	3.67625	0.476723	Down		callose synthase-like protein;(source:Araport11)	0.01413	6.664	6.561	10.88	6.741	4.408	3.783	4.454	2.06
ATCG00190	15.1925	30.8625	2.03143	Up	RNA POLYMERASE SUBUNIT BETA (RPOB)	Chloroplast DNA-dependent RNA polymerase B subunit. The transcription of this gene is regulated by a nuclear encoded RNA polymerase. This gene has been transferred to mitochondrial genome during crucifer evolution.	0.01413	15.35	15.61	12.33	17.48	20.88	21.13	18.76	62.68
AT1G68875	214.925	127.423	0.59287	Down		hypothetical protein;(source:Araport11)	0.01413	246.4	207.7	162.6	243	115.3	162.3	154.5	77.59
AT1G74550	55.9175	37.8375	0.676667	Down	CYTOCHROME P450, FAMILY 98, SUBFAMILY A, POLYPEPTIDE 9 (CYP98A9)	Encodes a tricoumaroylspermidine meta-hydroxylase that participates in the formation of N1,N5-di(hydroxyferuloyol)- N10-sinapoylspermidine, an important constituent of pollen. This gene appears to be expressed in young flower buds and inflorescence tips with notably high levels of expression in the tapetum and pollen. It is also expressed in root tips.	0.01419	56.77	57	54.26	55.64	31.72	36.68	46.62	36.33
AT2G33100	2.58685	0.932025	0.360293	Down	CELLULOSE SYNTHASE-LIKE D1 (CSLD1)	encodes a gene similar to cellulose synthase	0.01419	2.747	2.014	4.637	0.9494	1.579	0.8764	0.604	0.6687
AT1G59870	6.08	9.17175	1.50851	Up	PENETRATION 3 (PEN3)	ATP binding cassette transporter. Localized to the plasma membrane in uninfected cells. In infected leaves, the protein concentrated at infection sites. Contributes to nonhost resistance to inappropriate pathogens that enter by direct penetration in a salicylic acid?dependent manner. Required for mlo resistance. Has Cd transporter activity (Cd2+ extrusion pump) and contributes to heavy metal resi…	0.01419	7.008	6.415	6.114	4.783	7.684	9.404	8.519	11.08
AT1G10930	12.5435	18.85	1.50277	Up	(RECQ4A)	DNA helicase involved in the maintenance of genome stability by modulation of the DNA damage response and suppression of homologous recombination.	0.01419	14.99	14.19	9.814	11.18	16.41	16.42	17.42	25.15
AT2G23970	1.864	0.762325	0.408973	Down		Class I glutamine amidotransferase-like superfamily protein;(source:Araport11)	0.01424	1.588	2.191	1.29	2.387	0.5245	0.7983	0.9755	0.751
AT2G44940	14.55	8.674	0.596151	Down	ETHYLENE-RESPONSIVE TRANSCRIPTION FACTOR 34 (ERF34)	encodes a member of the DREB subfamily A-4 of ERF/AP2 transcription factor family. The protein contains one AP2 domain. There are 17 members in this subfamily including TINY.	0.01425	15.62	14.69	13.03	14.86	11.4	9.307	7.779	6.21
AT1G05400	6.94925	3.111	0.447674	Down		hypothetical protein;(source:Araport11)	0.01426	6.947	6.065	6.844	7.941	3.888	3.87	3.599	1.087
AT3G56150	42.5075	68.1175	1.60248	Up	EUKARYOTIC TRANSLATION INITIATION FACTOR 3C (EIF3C)	member of eIF3c - eukaryotic initiation factor 3c	0.0143	42.26	48.27	34.39	45.11	52.29	56.26	58.62	105.3
AT1G61680	8.5445	1.53615	0.179782	Down	TERPENE SYNTHASE 14 (TPS14)	terpene synthase 14;(source:Araport11)	0.01434	11.97	5.837	14.6	1.771	3.467	2.042	0.1202	0.5154
AT1G01100	172.625	249.5	1.44533	Up	60S ACIDIC RIBOSOMAL PROTEIN P1-1 (RPP1A)	Co-orthologous gene of large ribosomal subunit protein RPP1.	0.01443	186.9	186.8	113.8	203	237.5	249.1	242.2	269.2
AT3G18130	57.2775	82.6675	1.44328	Up	RECEPTOR FOR ACTIVATED C KINASE 1C (RACK1C_AT)	Encodes a protein with similarity to mammalian RACKs. RACKs function to shuttle activated protein kinase C to different subcellular sites and may also function as a scaffold through physical interactions with other proteins. RACK1C has no phenotype on its own and probably acts redundantly with RACK1A and RACK1B.	0.01446	59.87	61.6	53.5	54.14	87.86	91.6	88.3	62.91
AT3G21420	12.8825	7.69	0.596934	Down	LATERAL BRANCHING OXIDOREDUCTASE 1 (LBO1)	LATERAL BRANCHING OXIDOREDUCTASE (LBO), encodes an oxidoreductase-like enzyme of the 2-oxoglutarate and Fe(II)-dependent dioxygenase superfamily. It is involved in the biosynthesis of strigolactones.	0.01449	11.07	13.42	12.27	14.77	9.261	8.821	7.582	5.096
AT3G62270	2.49125	4.02575	1.61596	Up	REQUIRES HIGH BORON 2 (BOR2)	BOR2 is involved in efficient borate crosslinking of rhamnogalacturonan II in cell walls under boron limitation.	0.01464	2.909	2.996	2.055	2.005	3.407	4.527	4.223	3.946
AT4G33200	14.385	21.21	1.47445	Up	(XI-I)	member of Myosin-like proteins	0.01465	15.36	16.87	10.94	14.37	19.02	17.89	19.93	28
AT1G69540	4.50075	2.462	0.54702	Down	AGAMOUS-LIKE 94 (AGL94)	Encodes a member of the MIKC (MADS box, Keratin binding domain, and C terminal domain containing )family of transcriptional regulators.	0.01472	4.058	5.046	3.385	5.514	2.832	2.112	2.162	2.742
AT5G50030	156.143	49.42	0.316506	Down		Plant invertase/pectin methylesterase inhibitor superfamily protein;(source:Araport11)	0.01472	115.6	111	316.5	81.47	108.2	39.79	33.23	16.46
AT2G30630	6.135	3.4945	0.569601	Down		P-loop containing nucleoside triphosphate hydrolases superfamily protein;(source:Araport11)	0.01472	4.924	7.599	5.527	6.49	4.484	2.614	3.477	3.403
AT1G78370	127.26	178.7	1.40421	Up	GLUTATHIONE S-TRANSFERASE TAU 20 (GSTU20)	Encodes glutathione transferase belonging to the tau class of GSTs. Naming convention according to Wagner et al. (2002).	0.01472	144	130.3	94.54	140.2	184.4	172.2	178	180.2
AT5G46070	10.1032	16.515	1.63462	Up	GUANYLATE-BINDING PROTEIN-LIKE 3 (GBPL3)	Guanylate-binding family protein;(source:Araport11)	0.01474	11.52	12.15	7.235	9.508	13.73	12.46	14.88	24.99
AT2G13350	19	6.88825	0.362539	Down		Calcium-dependent lipid-binding (CaLB domain) family protein;(source:Araport11)	0.01478	15.46	15.99	31.34	13.21	15.35	5.108	4.166	2.929
AT2G29790	18.2725	7.11125	0.389178	Down	POLLEN COAT PROTEIN B CLASS BETA (PCP-BBETA)	Encodes a Maternally expressed gene (MEG) family protein [pseudogene]	0.0148	11.13	18.05	26.45	17.46	12.69	7.4	5.358	2.997
AT1G79250	6.27225	2.57225	0.4101	Down	AGC KINASE 1.7 (AGC1.7)	AGC kinase 1.7;(source:Araport11)	0.0148	4.832	6.655	8.699	4.903	4.951	2.397	1.783	1.158
AT5G10340	2.20975	1.06365	0.481344	Down		F-box family protein;(source:Araport11)	0.01483	2.162	1.815	2.41	2.452	0.9173	1.076	1.361	0.9003
AT1G13245	1.595	3.45775	2.16787	Up	ROTUNDIFOLIA LIKE 17 (RTFL17)	ROTUNDIFOLIA like 17;(source:Araport11)	0.01485	1.549	1.765	1.188	1.878	2.226	4.227	3.149	4.229
AT3G01490	11.365	7.288	0.641267	Down	CONVERGENCE OF BLUE LIGHT AND CO2 (CBC1)	Belongs to the Raf-like kinase subfamily of the mitogen-activated protein kinase kinase kinase (MAPKKK) family. Negatively regulates stomatal opening by negatively regulating plasma membrane H+-ATPase phosphorylation.	0.01486	12.04	10.17	10.13	13.12	6.996	7.515	8.441	6.2
AT3G04550	16.3425	25.705	1.57289	Up	RUBISCO ACCUMULATION FACTOR 1 (RAF1)	Encodes an ancillary chaperone protein that functions in Rubisco biogenesis. RAF1 dimers function in the assembly of the large subunit of Rubisco. Co-expression of RAF1 and rbcL in tobacco cells results in increased photosynthesis and plant growth. The mRNA is cell-to-cell mobile.	0.01492	15.15	15.42	18.83	15.97	25.46	18.84	26.19	32.33
AT3G52810	71.6325	39.525	0.551775	Down	PURPLE ACID PHOSPHATASE 21 (PAP21)	purple acid phosphatase 21;(source:Araport11)	0.01505	52.43	72.51	106.9	54.69	46.74	32.31	48.57	30.48
AT5G62750	8.13625	1.5763	0.193738	Down		hypothetical protein;(source:Araport11)	0.01506	8.331	5.478	16.28	2.456	3.497	2.105	0.5971	0.1061
AT2G38690	4.59925	1.968	0.427896	Down		gem-associated-like protein;(source:Araport11)	0.01507	4.943	3.731	7.149	2.574	2.184	1.721	2.487	1.48
AT3G21320	20.4275	8.92025	0.436678	Down		EARLY FLOWERING protein;(source:Araport11)	0.01507	13.54	19.61	30.23	18.33	17.06	6.443	7.398	4.78
AT1G23130	5.5435	2.6385	0.475963	Down		Polyketide cyclase/dehydrase and lipid transport superfamily protein;(source:Araport11)	0.01511	4.36	7.417	5.841	4.556	3.492	2.736	2.441	1.885
AT4G17530	70.8125	46.1975	0.652392	Down	RAB GTPASE HOMOLOG 1C (RAB1C)	AtRabD2c encodes a Rab GTPase, which plays important roles in pollen development, germination and tube elongation.	0.01514	65.32	75.15	67.37	75.41	46.7	56.98	46.58	34.53
AT4G03620	1.37183	0.394775	0.287774	Down		myosin heavy chain-like protein;(source:Araport11)	0.01527	1.286	1.659	1.801	0.7413	0.7892	0.4883	0.1293	0.1723
AT1G29357	22.835	15.215	0.666302	Down		Natural antisense transcript overlaps with AT1G29355;(source:Araport11)	0.01533	25.08	21.7	24.01	20.55	15.86	16.08	16.09	12.83
AT5G60680	56.2625	96.255	1.71082	Up		transcription initiation factor TFIID subunit (Protein of unknown function, DUF584);(source:Araport11)	0.01535	51.92	40.09	81.68	51.36	85.11	97.4	116.1	86.41
AT2G31425	30.4	9.75275	0.320814	Down		Plant invertase/pectin methylesterase inhibitor superfamily protein;(source:Araport11)	0.01535	21.89	27	44.23	28.48	22.49	9.977	3.507	3.037
AT5G28237	1.37525	0.50585	0.367824	Down		Pyridoxal-5-phosphate-dependent enzyme family protein;(source:Araport11)	0.01535	1.397	1.918	1.073	1.113	0.7152	0.7003	0.4732	0.1347
ATCG01210	4.9925	10.826	2.16845	Up	RIBOSOMAL RNA 16S (RRN16S.2)	chloroplast-encoded 16S ribosomal RNA	0.01536	3.324	4.139	8.221	4.286	10.52	6.706	9.308	16.77
AT1G49760	59.6925	84.43	1.41442	Up	POLY(A) BINDING PROTEIN 8 (PAB8)	polyadenylate-binding protein, putative / PABP, putative, similar to poly(A)-binding protein GB:AAF66825 GI:7673359 from (Nicotiana tabacum). Highly and ubiquitously expressed. Member of the class II PABP family.	0.01536	66.52	68.99	43.59	59.67	81.89	80.04	83.53	92.26
AT1G78820	41.84	66.355	1.58592	Up		D-mannose binding lectin protein with Apple-like carbohydrate-binding domain-containing protein;(source:Araport11)	0.01545	47.13	41.5	50.05	28.68	75.85	62.81	72.86	53.9
AT5G07475	28.5925	17.01	0.594911	Down		Cupredoxin superfamily protein;(source:Araport11)	0.01545	28.55	26.24	33.97	25.61	16.89	17.82	21.76	11.57
AT1G72960	5.38175	3.0605	0.568681	Down		Root hair defective 3 GTP-binding protein (RHD3);(source:Araport11)	0.01545	4.407	6.669	5.154	5.297	3.883	2.092	3.056	3.211
AT2G21680	0.667325	0.235825	0.353389	Down		Galactose oxidase/kelch repeat superfamily protein;(source:Araport11)	0.01545	0.4599	0.9015	0.8057	0.5022	0.2766	0.2079	0.2938	0.165
AT5G46970	16.4315	6.267	0.381402	Down		pectin methylesterase inhibitor	0.0155	8.166	19.9	25.13	12.53	10.81	5.08	6.311	2.867
AT1G64640	72.02	39.4325	0.547522	Down	EARLY NODULIN-LIKE PROTEIN 8 (ENODL8)	early nodulin-like protein 8;(source:Araport11)	0.01552	57.21	59.82	109.7	61.35	45.42	46.07	40.43	25.81
AT4G01640	0.45335	0.10781	0.237807	Down		F-box associated ubiquitination effector family protein;(source:Araport11)	0.01552	0.5347	0.3707	0.3187	0.5893	0.2195	0.03713	0.05671	0.1179
AT1G47280	2.76275	0.8814	0.31903	Down		hypothetical protein;(source:Araport11)	0.01552	3.528	2.555	3.113	1.855	1.816	0.7678	0.3323	0.6095
AT1G04880	12.062	7.66375	0.635363	Down	ARID-HMG DNA-BINDING PROTEIN 15 (HMGBD15)	Encodes a ARID-HMG DNA-binding protein that functions in pollen tube growth through the regulation of gene expression by interacting with the transcription factors AGL66 and AGL104.	0.01554	12.93	12.87	12.96	9.488	7.88	6.938	8.651	7.186
AT1G24400	81.49	44.775	0.549454	Down	LYSINE HISTIDINE TRANSPORTER 2 (LHT2)	High-affinity transporter for neutral and acidic amino acids, expressed in tapetum tissue of anthers. Transport of 1-Aminocyclopropane-1-carboxylic acid (ACC).	0.01556	51.97	83.82	127.5	62.67	53.09	37.21	46.71	42.09
AT3G60690	10.4767	16.42	1.56728	Up	SMALL AUXIN UPREGULATED RNA 59 (SAUR59)	SAUR-like auxin-responsive protein family;(source:Araport11)	0.01561	10.15	8.927	10.88	11.95	17.1	17.15	16.49	14.94
AT4G36570	31.21	18.4875	0.592358	Down	RAD-LIKE 3 (RL3)	RAD-like 3;(source:Araport11)	0.0158	29.07	30.92	27.02	37.83	17.84	24.39	17.08	14.64
AT5G50320	6.6635	9.773	1.46665	Up	ELONGATA 3 (ELO3)	A subunit of Elongator, a histone acetyl transferase complex, consisting of six subunits (ELP1?ELP6), that copurifies with the elongating RNAPII in yeast and humans. Three Arabidopsis thaliana genes, encoding homologs of the yeast Elongator subunits ELP1, ELP3 (histone acetyl transferase), and ELP4 are responsible for the narrow leaf phenotype in elongata mutants and for reduced root growth that …	0.0158	7.829	7.673	5.012	6.14	10.41	9.028	9.808	9.846
AT1G49210	0.051935	0.316227	6.08891	Up	ARABIDOPSIS T??XICOS EN LEVADURA 76 (ATL76)	RING/U-box superfamily protein;(source:Araport11)	0.0158	0.09449	0.04023	0.07302	0	0.3621	0.4593	0.3625	0.08101
AT3G07820	309.475	122.382	0.395452	Down		Pectin lyase-like superfamily protein;(source:Araport11)	0.01585	249.9	291.8	462.3	233.9	249.7	99.85	97.2	42.78
AT5G61380	24.755	35.7875	1.44567	Up	TIMING OF CAB EXPRESSION 1 (TOC1)	Pseudo response regulator involved in the generation of circadian rhythms. TOC1 appears to shorten the period of circumnutation speed. TOC1 contributes to the plant fitness (carbon fixation, biomass) by influencing the circadian clock period. PRR3 may increase the stability of TOC1 by preventing interactions between TOC1 and the F-box protein ZTL. Expression of TOC1 is correlated with rhythmic ch…	0.01585	26.16	24.99	20.85	27.02	31.26	31.55	34.08	46.26
AT2G37220	335.975	510.25	1.51871	Up		Encodes a chloroplast RNA binding protein. A substrate of the type III effector HopU1 (mono-ADP-ribosyltransferase). Protein is tyrosine-phosphorylated and its phosphorylation state is modulated in response to ABA in Arabidopsis thaliana seeds.	0.01591	310.3	325.1	369.3	339.2	498.6	415.5	486.7	640.2
AT3G61340	3.4335	1.80675	0.526212	Down		F-box and associated interaction domains-containing protein;(source:Araport11)	0.01591	3.469	3.927	2.57	3.768	1.6	2.084	2.048	1.495
AT3G10270	6.36975	9.6885	1.52102	Up	DNA GYRASE B1 (GYRB1)	Protein targeting to mitochondria is influenced by UTR sequences.	0.01595	8.089	7.116	4.71	5.564	8.563	8.637	9.724	11.83
AT3G59830	1.673	0.781875	0.467349	Down		Integrin-linked protein kinase family;(source:Araport11)	0.01597	1.461	1.731	1.665	1.835	1.079	0.7539	0.7697	0.5249
AT1G02770	2.84725	1.34408	0.472061	Down		hypothetical protein;(source:Araport11)	0.01597	2.963	2.744	2.477	3.205	1.641	1.237	1.713	0.7853
AT1G77980	9.15675	3.65205	0.398837	Down	AGAMOUS-LIKE 66 (AGL66)	Encodes a member of the MIKC (MADS box, Keratin binding domain, and C terminal domain containing )family of transcriptional regulators. AGL66 is expressed in pollen.It forms heterodimers with other MICK family members (AGL104). Involved in late stages of pollen development and pollen tube growth.	0.01597	9.717	8.938	12.01	5.962	5.73	4.552	3.342	0.9842
AT4G34550	3.122	1.413	0.452594	Down		F-box protein;(source:Araport11)	0.01604	2.431	2.517	2.913	4.627	1.251	1.317	1.183	1.901
AT3G44050	3.11625	5.47925	1.75828	Up	(KINESIN-12E)	Kinesin involved in spindle assembly.	0.01606	3.088	3.638	2.37	3.369	3.939	4.152	4.633	9.193
AT2G42870	19.84	30.3925	1.53188	Up	PHY RAPIDLY REGULATED 1 (PAR1)	Encodes PHYTOCHROME RAPIDLY REGULATED1 (PAR1), an atypical basic helix-loop-helix (bHLP) protein. Closely related to PAR2 (At3g58850). Up regulated after simulated shade perception. Acts in the nucleus to control plant development and as a negative regulator of shade avoidance response. Functions as transcriptional repressor of auxin-responsive genes SAUR15 (AT4G38850) and SAUR68 (AT1G29510).	0.01609	22.42	21.33	16.49	19.12	24.29	26.7	28.81	41.77
AT1G51260	1.317	0.50975	0.387054	Down	LYSOPHOSPHATIDYL ACYLTRANSFERASE 3 (LPAT3)	ACYL-COA:1-ACYLGLYCEROL-3-PHOSPHATE ACYLTRANSFERASE, PUTATIVE SIMILAR TO ACYL-COA:1-ACYLGLYCEROL-3-PHOSPHATE ACYLTRANSFERASE GI:4583544 FROM [BRASSICA NAPUS]	0.01612	1.071	1.591	1.587	1.019	0.8877	0.4254	0.3287	0.3972
AT3G01990	3.54925	1.9175	0.540255	Down	ACT DOMAIN REPEAT 6 (ACR6)	Member of a small family of ACT domain containing proteins in Arabidopsis. ACT domains are involved in amino acid binding.	0.01613	3.483	3.372	3.514	3.828	2.056	1.863	2.327	1.424
AT3G56180	1.27225	0.196277	0.154276	Down		LURP-one-like protein (DUF567);(source:Araport11)	0.01613	1.867	0.699	2.388	0.135	0.4395	0.2739	0.07171	0
AT1G04400	30.475	43.7075	1.43421	Up	CRYPTOCHROME 2 (CRY2)	Blue light receptor mediating blue-light regulated cotyledon expansion and flowering time. Positive regulator of the flowering-time gene CONSTANS. This gene possesses a light-induced CNT2 N-terminal homodimerisation domain.Involved in blue-light induced stomatal opening. Involved in triggering chromatin decondensation. An 80-residue motif (NC80) is sufficient to confer CRY2's physiological functi…	0.01615	38.13	30.93	24.13	28.71	38.45	39.66	44.34	52.38
AT5G56747	6.9395	3.996	0.575834	Down		transposable_element_gene;(source:Araport11);copia-like retrotransposon family, has a 1.2e-45 P-value blast match to GB:CAA72989 open reading frame 1 (Ty1_Copia-element) (Brassica oleracea);(source:TAIR10)	0.01615	6.69	7.538	6.823	6.707	3.76	4.733	3.973	3.518
AT4G23895	77.2525	51.4275	0.665707	Down		Pleckstrin homology (PH) domain-containing protein;(source:Araport11)	0.01616	67.56	80.24	71.27	89.94	54.48	55.71	55.2	40.32
AT2G03830	11.8878	5.99925	0.504658	Down	ROOT MERISTEM GROWTH FACTOR 8 (RGF8)	Encodes a root meristem growth factor (RGF). Belongs to a family of functionally redundant homologous peptides that are secreted, tyrosine-sulfated, and expressed mainly in the stem cell area and the innermost layer of central columella cells. RGFs are required for maintenance of the root stem cell niche and transit amplifying cell proliferation. Members of this family include: At5g60810 (RGF1), …	0.01619	9.401	11.64	13.44	13.07	6.199	6.577	7.976	3.245
AT5G54190	1.95425	3.582	1.83293	Up	PROTOCHLOROPHYLLIDE OXIDOREDUCTASE A (PORA)	light-dependent NADPH:protochlorophyllide oxidoreductase A	0.01632	2.75	1.601	1.651	1.815	2.851	3.616	4.057	3.804
AT5G08610	18.8875	29.4775	1.56069	Up	PIGMENT DEFECTIVE 340 (PDE340)	P-loop containing nucleoside triphosphate hydrolases superfamily protein;(source:Araport11)	0.01643	24.5	20.1	11.81	19.14	24.38	25.63	28.25	39.65
AT4G05260	0.991525	0.362175	0.365271	Down		Ubiquitin-like superfamily protein;(source:Araport11)	0.01643	1.238	0.8132	1.025	0.8899	0.5083	0.2149	0.4071	0.3184
AT1G06950	36.995	59.4575	1.60718	Up	TRANSLOCON AT THE INNER ENVELOPE MEMBRANE OF CHLOROPLASTS 110 (TIC110)	Encodes a protein thought to be a part of the translocon at the chloroplast inner envelope. Involved in protein import into the chloroplast and chloroplast biogenesis. C-terminal half of Tic110 functions as scaffolds for protein-protein interactions.	0.01644	42.56	40.28	24.96	40.18	45.93	50.59	50.71	90.6
AT1G55330	152.4	96.1625	0.630988	Down	ARABINOGALACTAN PROTEIN 21 (AGP21)	Encodes a putative arabinogalactan-protein (AGP21).	0.01644	134.4	153.5	159	162.7	100.8	124.1	91.77	67.98
AT2G29760	0.955175	1.75625	1.83867	Up	ORGANELLE TRANSCRIPT PROCESSING 81 (OTP81)	Encodes a chloroplast RNA editing factor.	0.01644	1.172	1	0.7673	0.8814	1.547	1.4	1.816	2.262
AT3G17660	3.93825	1.5659	0.397613	Down	ARF-GAP DOMAIN 15 (AGD15)	A member of ARF GAP domain (AGD), A thaliana has 15 members, grouped into four classes; AGD15 belongs to the class 4, together with AGD14.	0.01647	4.086	4.693	3.659	3.315	2.326	2.096	1.398	0.4436
AT1G04210	25.1775	36.0475	1.43173	Up		Encodes a putative Raf-related kinase.	0.01648	26.82	29.65	19.7	24.54	31.45	33.76	33.94	45.04
AT3G27940	1.989	0.74725	0.375691	Down	LOB DOMAIN-CONTAINING PROTEIN 26 (LBD26)	LOB domain-containing protein 26;(source:Araport11)	0.01655	3.095	1.071	2.571	1.219	0.5894	0.9062	0.6782	0.8152
AT1G59760	6.1355	9.77525	1.59323	Up	HOMOLOG OF YEAST MTR4 (MTR4)	Encodes MTR4, a putative RNA helicase and exosome co-factor. Required for proper rRNA biogenesis and development.	0.01655	7.369	7.377	4.488	5.308	7.811	8.372	8.888	14.03
AT3G60540	5.452	2.5955	0.476064	Down		Preprotein translocase Sec, Sec61-beta subunit protein;(source:Araport11)	0.01662	3.868	5.627	4.991	7.322	3.381	2.374	1.909	2.718
AT5G15190	5.8185	2.872	0.493598	Down		hypothetical protein;(source:Araport11)	0.01669	5.611	6.546	4.696	6.421	3.639	3.446	2.527	1.876
AT4G10380	17.345	10.842	0.625079	Down	NOD26-LIKE INTRINSIC PROTEIN 5;1 (NIP5;1)	Boric acid channel. Essential for efficient boron uptake and plant development under boron limitation. Also functions in arsenite transport and tolerance. Localized preferentially in outer membrane domains of root cells.	0.01674	14.08	19.42	19.94	15.94	10.84	13.32	10.64	8.568
AT2G38740	85.885	56.295	0.65547	Down	BROAD-RANGE SUGAR PHOSPHATE PHOSPHATASE (SGPP)	HAD-type phosphosugar phosphatase.	0.01674	72.46	93.11	71.67	106.3	63.99	61.13	52.13	47.93
AT3G21700	13.1288	6.22325	0.474017	Down	(SGP2)	Monomeric G protein. Expressed in root epidermal cells that are destined to become atrichoblasts. Also expressed during pollen development and in the pollen tube tip.	0.01674	9.755	12.25	17.43	13.08	11.01	4.911	5.452	3.52
AT3G58650	4.79725	7.49475	1.5623	Up	TON1 RECRUITING MOTIF 7 (TRM7)	Encodes a member of the TRM superfamily, that plays a role in preprophase band formation during plant cell division and controls the robustness of the orientation of that cell division. Its transcription is regulated by the cell cycle and peaks at the G2/M transition.	0.01674	4.998	5.5	3.413	5.278	6.796	5.935	6.888	10.36
AT5G07110	15.9125	6.6	0.414768	Down	PRENYLATED RAB ACCEPTOR 1.B6 (PRA1.B6)	Encodes PRA1.B6, an isoform of the PRA1 (Prenylated Rab acceptors) family. PRAs bind to prenylated Rab proteins and possibly aids in targeting Rabs to their respective compartments. PRA1.B6 localizes to the Golgi apparatus and its ER-to-Golgi trafficking and localization to the Golgi apparatus are regulated by multiple sequence motifs in both the C- and N-terminal cytoplasmic domains.	0.01683	9.92	11.59	29.26	12.88	10.29	5.594	7.155	3.361
AT3G27770	62.19	41.04	0.659913	Down	HYPOXIA RESPONSE UNKNOWN PROTEIN 53 (HUP53)	plant/protein;(source:Araport11)	0.01683	57.84	61.61	54.28	75.03	43.96	47.63	40.72	31.85
AT2G31740	6.34375	9.4255	1.48579	Up		S-adenosyl-L-methionine-dependent methyltransferases superfamily protein;(source:Araport11)	0.01689	7.269	6.818	4.886	6.402	7.93	8.707	9.145	11.92
AT2G05120	5.32975	8.25025	1.54796	Up	(NUP133)	Nucleoporin, Nup133/Nup155-like protein;(source:Araport11)	0.01689	5.731	6.407	4.034	5.147	7.059	6.553	7.819	11.57
AT2G35070	8.2975	4.489	0.541006	Down		transmembrane protein;(source:Araport11)	0.01696	7.539	7.349	7.252	11.05	4.06	5.897	4.388	3.611
AT1G23150	37.06	19.635	0.529817	Down		hypothetical protein;(source:Araport11)	0.01697	25.93	30.3	58.29	33.72	26.83	14.55	20.32	16.84
AT1G23149	37.06	19.635	0.529817	Down			0.01697	25.93	30.3	58.29	33.72	26.83	14.55	20.32	16.84
AT5G58050	30.7375	11.3667	0.369801	Down	SHV3-LIKE 4 (SVL4)	Encodes a member of the glycerophosphodiester phosphodiesterase like (GDPD-like) family.	0.01698	23.72	22.13	60.85	16.25	21.96	10.64	7.449	5.418
AT1G75750	20.4525	12.925	0.631952	Down	GAST1 PROTEIN HOMOLOG 1 (GASA1)	GA-responsive GAST1 protein homolog regulated by BR and GA antagonistically. Possibly involved in cell elongation based on expression data The mRNA is cell-to-cell mobile.	0.01698	21.81	21.63	19.23	19.14	12.76	14.21	13.81	10.92
AT1G03050	5.886	1.60707	0.273033	Down	PHOSPHATIDYLINOSITOL BINDING CLATHRIN ASSEMBLY PROTEIN 5A (PICALM5A)	Phosphatidylinositol binding clathrin assembly protein 5A/B are recent paralogs with overlapping functions in recycling ANXUR proteins to the pollen tube membrane.	0.01698	5.748	4.939	8.124	4.733	3.905	1.693	0.5794	0.2509
AT1G48650	10.6167	16.925	1.59418	Up		DEA(D/H)-box RNA helicase family protein;(source:Araport11)	0.01699	11.7	13.23	7.507	10.03	14.14	13.63	14.89	25.04
AT1G23700	8.23175	4.61725	0.560907	Down		Protein kinase superfamily protein;(source:Araport11)	0.01699	10.48	7.532	8.479	6.436	5.208	5.289	4.948	3.024
AT5G40960	15.2075	8.4235	0.553904	Down		transmembrane protein, putative (DUF 3339);(source:Araport11)	0.01699	12.44	13.5	18.86	16.03	10.4	8.875	7.983	6.436
AT3G59820	9.228	14.4325	1.56399	Up	LEUCINE ZIPPER-EF-HAND-CONTAINING TRANSMEMBRANE PROTEIN 1 (LETM1)	LETM1-like protein;(source:Araport11)	0.017	11.16	10.53	7.173	8.049	11.65	12.29	13.34	20.45
AT1G43800	1.49808	3.457	2.30763	Up	FLORAL TRANSITION AT THE MERISTEM1 (FTM1)	Δ9 stearoyl-ACP desaturase which together with FAB2, AAD1, and AAD5 redundantly participates in oil storage during the maturation phase.	0.017	3.015	1.133	0.9023	0.942	2.577	3.592	4.06	3.599
AT5G13170	19.12	12.43	0.650105	Down	SENESCENCE-ASSOCIATED GENE 29 (SAG29)	Encodes a member of the SWEET sucrose efflux transporter family proteins.	0.01704	17.2	22.77	19.8	16.71	12.89	12.82	13.42	10.59
AT4G04020	149.225	91.9825	0.616401	Down	FIBRILLIN (FIB)	Fibrillin precursor protein. The fibrillin preprotein, but not the mature protein interacts with ABI2. Regulated by abscisic acid response regulators. Involved in abscisic acid-mediated photoprotection. The mRNA is cell-to-cell mobile.	0.01706	128.8	136	177	155.1	104.8	101	101.6	60.53
AT5G07420	31.64	6.72233	0.212463	Down		Pectin lyase-like superfamily protein;(source:Araport11)	0.01707	36.78	24.21	52.84	12.73	16.07	8.713	1.273	0.8333
AT5G36030	0.31135	0.0802525	0.257757	Down		transposable_element_gene;(source:Araport11);similar to Ulp1 protease family protein [Arabidopsis thaliana] (TAIR:AT4G19310.1);(source:TAIR10)	0.01714	0.233	0.1786	0.443	0.3908	0.134	0.09062	0.04844	0.04795
AT5G48240	24.9025	36.0425	1.44734	Up		Rrp15p protein;(source:Araport11)	0.01714	22.98	26.2	24.01	26.42	31.72	37.66	32.36	42.43
AT5G20225	1.45675	0.4629	0.317762	Down		Natural antisense transcript overlaps with AT5G20220;(source:Araport11)	0.01715	0.795	1.045	2.575	1.412	0.5712	0.341	0.2778	0.6616
AT3G23890	15.88	27.135	1.70875	Up	TOPOISOMERASE II (TOPII)	Encodes a topoisomerase II that is highly expressed in young seedlings. The protein is localized in the nucleus and gene expression levels are increased in proliferative tissues.	0.01715	17.91	19.12	10.93	15.56	19.18	20.48	23.34	45.54
AT2G18700	9.0875	16.5175	1.81761	Up	TREHALOSE PHOSPHATASE/SYNTHASE 11 (TPS11)	Encodes an enzyme putatively involved in trehalose biosynthesis. The protein has a trehalose synthase (TPS)-like domain that may or may not be active as well as a trehalose phosphatase (TPP)-like domain.	0.01715	12.22	8.432	7.327	8.371	10.95	11.62	14.62	28.88
AT3G20540	5.33225	8.61975	1.61653	Up	POLYMERASE GAMMA 1 (POLGAMMA1)	Encodes an organellar DNA polymerase I that is also involved in double strand break repair.	0.01718	6.064	6.045	4.312	4.908	6.566	6.696	8.087	13.13
AT5G36870	0.0872575	0.0266685	0.30563	Down	GLUCAN SYNTHASE-LIKE 9 (GSL09)	encodes a gene similar to callose synthase	0.01718	0.09328	0.09405	0.07113	0.09057	0.03175	0.0358	0.03281	0.006314
AT1G15320	3.76925	2.0045	0.531803	Down		seed dormancy control protein;(source:Araport11)	0.01718	4.342	4.111	3.198	3.426	1.721	2.391	2.311	1.595
AT5G63580	7.53325	3.9215	0.520559	Down	FLAVONOL SYNTHASE 2 (FLS2)	encodes a protein whose sequence is similar to flavonol synthase	0.01718	6.208	9.32	6.649	7.956	5.078	4.647	3.72	2.241
AT3G23990	42.68	67.015	1.57017	Up	HEAT SHOCK PROTEIN 60 (HSP60)	mitochondrial chaperonin HSP. assist in rapid assembly of the oligomeric protein structures in the mitochondria.	0.01718	45.16	49.44	26.23	49.89	55.05	57.83	61.19	93.99
AT3G02810	2.79475	0.842375	0.301413	Down	LOST IN POLLEN TUBE GUIDANCE 2 (LIP2)	Encodes a receptor-like cytoplasmic kinase localized in the membrane of pollen tube tip regions that controls micropylar pollen tube guidance in Arabidopsis.	0.01724	3.786	1.975	4.18	1.238	1.761	0.9357	0.3097	0.3631
AT4G01600	3.9835	1.90125	0.477281	Down		GRAM domain family protein;(source:Araport11)	0.01728	3.809	3.945	4.525	3.655	2.369	2.395	1.379	1.462
AT4G17140	9.467	14.595	1.54167	Up		pleckstrin homology (PH) domain-containing protein;(source:Araport11)	0.01728	10.18	11.23	7.694	8.764	12.56	11.43	13.01	21.38
AT1G60180	1.00907	0.41945	0.415678	Down		pseudogene of F-box family protein	0.01731	0.8051	1.285	0.9332	1.013	0.4005	0.4139	0.4253	0.4381
AT2G33060	4.65425	7.792	1.67417	Up	RECEPTOR LIKE PROTEIN 27 (RLP27)	receptor like protein 27;(source:Araport11)	0.0174	4.744	3.894	5.181	4.798	5.304	6.768	7.756	11.34
AT1G80760	18.105	10.877	0.600773	Down	NOD26-LIKE INTRINSIC PROTEIN 6;1 (NIP6;1)	Encodes a protein with boron transporter activity. It helps to preferentially direct boron to young developing tissues in the shoot, such as immature leaves, under low boron conditions. This boron channel appears to be impermeable to water, unlike the closely related NIP5;1 boron transporter. This protein also allows the transport of glycerol, urea, and formimide but not larger uncharged solutes …	0.01749	12.2	19.28	19.12	21.82	12.89	11.42	10.43	8.768
AT3G13400	1808	774.425	0.428332	Down	SKU5 SIMILAR 13 (sks13)	SKU5 similar 13;(source:Araport11)	0.01749	1082	1516	3210	1424	1348	576.1	704.7	468.9
AT3G27180	5.448	8.27225	1.5184	Up		S-adenosyl-L-methionine-dependent methyltransferases superfamily protein;(source:Araport11)	0.01752	6.088	6.414	4.332	4.958	7.07	8.107	8.243	9.669
AT3G53075	33.12	14.1837	0.428253	Down		D-galactoside/L-rhamnose binding SUEL lectin protein;(source:Araport11)	0.01754	18.98	29.75	50.76	32.99	23.45	13.13	14.17	5.985
AT4G27654	1.18372	0.412625	0.348582	Down		transmembrane protein;(source:Araport11)	0.01754	0.9159	1.133	1.294	1.392	0.3702	0.6261	0.2125	0.4417
AT5G04850	19.695	12.885	0.654227	Down	(VPS60.2)	SNF7 family protein;(source:Araport11)	0.01757	18.78	18.9	16.17	24.93	11.86	13.79	11.93	13.96
AT1G74210	76.57	42.975	0.561251	Down	GLYCEROPHOSPHODIESTER PHOSPHODIESTERASE 5 (GDPD5)	Encodes a member of the glycerophosphodiester phosphodiesterase (GDPD) family.	0.01758	59.66	71	110.1	65.52	53.86	44.96	46.59	26.49
AT2G35500	15.55	22.3925	1.44003	Up	SHIKIMATE KINASE-LIKE 2 (SKL2)	Encodes a protein with some sequence similarity to shikimate kinases, but a truncated form of this protein (lacking a putative N-terminal chloroplast transit peptide) does not have shikimate kinase activity in vitro.	0.01759	18.91	17.83	11.79	13.67	21.18	22.62	22.53	23.24
AT4G09984	6.12275	2.12475	0.347025	Down	LOW-MOLECULAR-WEIGHT CYSTEINE-RICH 34 (LCR34)	Encodes a member of a family of small,secreted, cysteine rich protein with sequence similarity to the PCP (pollen coat protein) gene family.	0.01762	3.529	5.532	9.421	6.009	3.765	1.689	1.945	1.1
AT4G30030	4.8505	2.4005	0.494897	Down		Eukaryotic aspartyl protease family protein;(source:Araport11)	0.01765	2.738	5.891	6.109	4.664	2.648	2.698	1.816	2.44
AT5G49030	12.28	18.7575	1.52748	Up	OVULE ABORTION 2 (OVA2)	tRNA synthetase class I (I, L, M and V) family protein;(source:Araport11)	0.01767	14.28	13.62	10.05	11.17	15.71	15.42	17.25	26.65
AT4G18480	56.955	78.5525	1.3792	Up	(CHLI1)	Encodes the CHLI subunit of magnesium chelatase which is required for chlorophyll biosynthesis. All four cysteine residues of the protein form two disulfide bonds (Cys102-Cys193 and Cys354-Cys396) under oxidized conditions but are fully reduced by reduction. It was suggested that the redox state of CHLI is regulated in vivo by the change of the redox environment in the chloroplasts probably via t…	0.01768	65.94	57.54	51.44	52.9	73.65	78.83	84.57	77.16
AT5G35910	10.511	15.235	1.44943	Up	RRP6-LIKE 2 (RRP6L2)	Encodes a nuclear-localized RRP6-like protein whose mutation leads to accumulation of an rRNA maturation by-product.	0.01769	11.49	12.4	8.643	9.511	13.75	14	14.43	18.76
AT4G22070	17.4525	10.6915	0.612606	Down	WRKY DNA-BINDING PROTEIN 31 (WRKY31)	member of WRKY Transcription Factor; Group II-b	0.01773	14.21	18.44	21.39	15.77	13.05	8.307	11.84	9.569
AT3G21980	6.14925	2.98075	0.484734	Down		cysteine-rich repeat secretory protein, putative (DUF26);(source:Araport11)	0.01778	4.375	6.055	7.854	6.313	3.772	2.473	3.218	2.46
AT3G22650	2.08842	0.476675	0.228246	Down	CEGENDUO (CEG)	F-box and associated interaction domains-containing protein;(source:Araport11)	0.0178	1.823	2.47	3.255	0.8057	0.7434	0.8981	0.2652	0
AT1G19180	36.1125	22.34	0.618622	Down	JASMONATE-ZIM-DOMAIN PROTEIN 1 (JAZ1)	JAZ1 is a nuclear-localized protein involved in jasmonate signaling. JAZ1 transcript levels rise in response to a jasmonate stimulus. JAZ1 can interact with the COI1 F-box subunit of an SCF E3 ubiquitin ligase in a yeast-two-hybrid assay only in the presence of jasmonate-isoleucine (JA-ILE) or coronatine. Application of jasmonate methyl ester to Arabidopsis roots reduces the levels of a JAZ1:GUS …	0.01786	29.9	33.23	45.26	36.06	27.28	24.41	19.58	18.09
AT5G20790	0.98555	0.355675	0.36089	Down		transmembrane protein;(source:Araport11)	0.01789	1.153	1.048	0.8484	0.8928	0.3187	0.4312	0.4446	0.2282
AT2G20020	13.4425	18.915	1.4071	Up	CHLOROPLAST RNA SPLICING2-ASSOCIATED FACTOR1 (CAF1)	Promotes the splicing of chloroplast group II introns. Splices clpP-1 and ropC1 introns.	0.01789	13.73	14.21	13.17	12.66	18.58	17.68	20.26	19.14
AT1G07140	57.31	79.195	1.38187	Up	(SIRANBP)	Encodes a putative Ran-binding protein (siRanBP).	0.01789	60.4	56.84	50.92	61.08	72.77	72.43	88.73	82.85
AT2G43240	37.635	25.845	0.686728	Down		Nucleotide-sugar transporter family protein;(source:Araport11)	0.01789	35.38	39.11	36.53	39.52	24.52	29.13	27.33	22.4
AT4G28397	144.475	95.9925	0.664423	Down		non-specific lipid-transfer-like protein;(source:Araport11)	0.01789	125.2	122.9	164.1	165.7	83.05	100.7	104.1	96.12
AT3G61560	26.02	15.8925	0.61078	Down	RETICULONB6 (RTNLB6)	Reticulon family protein;(source:Araport11)	0.01795	22.37	24.79	27.55	29.37	18.5	18.68	15.89	10.5
AT2G35210	5.495	2.2425	0.408098	Down	ROOT AND POLLEN ARFGAP (RPA)	A member of ARF GAP domain (AGD), A thaliana has 15 members, grouped into four classes.	0.01798	5.879	5.021	8.131	2.949	3.991	2.082	1.807	1.09
AT5G34853	6.463	9.32275	1.44248	Up	MUSTANG 8 (MUG8)	Encodes a member of a domesticated transposable element gene family MUSTANG. Members of this family are derived from transposable elements genes but gained function in plant fitness and flower development. Known members include: AT3G04605 (MUG1), AT2G30640 (MUG2), AT1G06740 (MUG3), AT5G16505 (MUG4), AT3G06940 (MUG5), AT5G48965 (MUG6), AT3G05850 (MUG7) and AT5G34853 (MUG8).	0.01807	6.691	7.528	5.744	5.889	8.029	8.554	9.498	11.21
AT5G10730	45.3575	29.46	0.649507	Down		NAD(P)-binding Rossmann-fold superfamily protein;(source:Araport11)	0.01808	41.58	47.03	33.59	59.23	31.28	31.47	28.94	26.15
AT2G07676	0.29445	1.29943	4.41306	Up		hypothetical protein;(source:Araport11)	0.01812	0.2705	0.4442	0.2687	0.1944	0.3887	1.221	1.004	2.584
AT2G31380	28.165	18.63	0.661459	Down	SALT TOLERANCE HOMOLOGUE (STH)	a B-box zinc finger protein that interacts with COP1. contains a novel 11 amino acid motif at the C-terminus (also found at the N-terminus of HY5) that is involved in the COP1 interaction.	0.01813	30.55	28.85	26.36	26.9	18.89	21.61	19.95	14.07
AT1G60480	2.23725	0.99825	0.446195	Down		pseudogene of ADP-ribosylation factor A1E;(source:Araport11)	0.01814	1.835	1.771	2.411	2.932	1.1	0.8426	1.233	0.8174
AT3G49180	4.373	6.992	1.5989	Up	ROOT INITIATION DEFECTIVE 3 (RID3)	Transducin/WD40 repeat-like superfamily protein;(source:Araport11)	0.01817	5.189	5.309	3.071	3.923	6.184	7.239	6.837	7.708
AT2G36990	10.2058	15.7075	1.53908	Up	RNAPOLYMERASE SIGMA-SUBUNIT F (SIGF)	Encodes a general sigma factor in chloroplasts and is probably responsible for the recognition of sigma 70 type standard bacteria-type multi-subunit RNA polymerase (PEP) promoters in young cotyledons. It is a substrate for regulatory phosphorylation by cpCK2, a nuclear-coded plastid-targeted casein kinase 2, that has been implicated as a key component in plant sigma factor phosphorylation and tra…	0.01828	12.48	11.9	6.659	9.784	12.62	15	14.78	20.43
AT1G30050	6.04675	3.06425	0.50676	Down	(MADA3)	tropomyosin;(source:Araport11)	0.01834	4.35	5.92	8.272	5.645	4.414	2.347	3.107	2.389
ATCG00400	18.6662	45.27	2.42523	Up	(TRNL.1)	tRNA-Leu	0.01838	17.69	19.69	30.48	6.805	51.08	39.84	45.91	44.25
AT2G26480	1.26157	0.546325	0.43305	Down	UDP-GLUCOSYL TRANSFERASE 76D1 (UGT76D1)	UDP-glucosyl transferase 76D1;(source:Araport11)	0.01838	1.839	1.342	0.9681	0.8972	0.3372	0.6158	0.4599	0.7724
AT4G25340	27.8125	46.0925	1.65726	Up	FK506 BINDING PROTEIN 53 (FKBP53)	Encodes a member of the FKBP-type immunophilin family that functions as a histone chaparone. Binds to 18S rDNA and represses its expression. The N-terminal nucleoplasmin domain interacts with H2A/H2B and H3/H4 histone oligomers, individually, as well as simultaneously, suggesting two different binding sites for H2A/H2B and H3/H4.	0.01842	26.82	29.92	20.97	33.54	33.32	40.16	36.33	74.56
AT1G61070	281.825	174.775	0.620154	Down	LOW-MOLECULAR-WEIGHT CYSTEINE-RICH 66 (LCR66)	Predicted to encode a PR (pathogenesis-related) protein. Belongs to the plant defensin (PDF) family with the following members: At1g75830/PDF1.1, At5g44420/PDF1.2a, At2g26020/PDF1.2b, At5g44430/PDF1.2c, At2g26010/PDF1.3, At1g19610/PDF1.4, At1g55010/PDF1.5, At2g02120/PDF2.1, At2g02100/PDF2.2, At2g02130/PDF2.3, At1g61070/PDF2.4, At5g63660/PDF2.5, At2g02140/PDF2.6, At5g38330/PDF3.1 and At4g30070/PDF…	0.01842	337.1	275	197.7	317.5	142	250.8	161.2	145.1
AT5G29560	10.725	4.9325	0.459907	Down		caleosin-related family protein;(source:Araport11)	0.01843	7.782	11.93	13.94	9.248	5.921	4.602	6.906	2.301
AT5G46980	0.35725	0.0419025	0.117292	Down		pectin methylesterase inhibitor	0.01843	0.1989	0.3492	0.5474	0.3335	0.1072	0.06041	0	0
AT4G21070	2.8765	4.78025	1.66183	Up	BREAST CANCER SUSCEPTIBILITY1 (BRCA1)	Encodes AtBRCA1, an ortholog of the human breast cancer susceptibility gene 1. Contains one N-terminal RING finger, two C-terminal BRCT and the p300/CBP interacting domain. Strongly induced by gamma rays, consistent with a putative role in DNA repair and in cell cycle control.	0.01843	3.112	3.67	2.003	2.721	3.978	3.854	4.499	6.79
AT5G61770	27.5225	40.3925	1.46762	Up	PETER PAN-LIKE PROTEIN (PPAN)	A single-copy gene encoding a 346 aa protein with a single Brix domain. Similar to yeast ribosome biogenesis proteins Ssf1/2.	0.01843	25.99	27.39	27.21	29.5	34.35	37.3	37.69	52.23
AT3G44215	0.0182925	0.0782725	4.27894	Up		transposable_element_gene;(source:Araport11);copia-like retrotransposon family, has a 1.8e-150 P-value blast match to GB:CAA72989 open reading frame 1 (Ty1_Copia-element) (Brassica oleracea);(source:TAIR10)	0.01849	0.0124	0.03959	0.01078	0.0104	0.05792	0.03767	0.1059	0.1116
AT2G01020	93.8525	189.55	2.01966	Up		5.8SrRNA	0.01853	160.2	97.12	56.16	61.93	175.3	118.4	142.5	322
AT3G30730	4.42725	1.781	0.402281	Down		hypothetical protein;(source:Araport11)	0.01879	3.043	4.318	5.017	5.331	1.361	1.644	1.858	2.261
AT4G37540	5.34325	10.1545	1.90044	Up	LOB DOMAIN-CONTAINING PROTEIN 39 (LBD39)	LOB domain-containing protein 39;(source:Araport11)	0.01887	6.988	6.357	5.4	2.628	9.843	8.458	8.657	13.66
AT3G44250	0.301088	0.0434175	0.144202	Down	CYTOCHROME P450, FAMILY 71, SUBFAMILY B, POLYPEPTIDE 38 (CYP71B38)	putative cytochrome P450	0.01893	0.4047	0.1292	0.6396	0.03085	0.0793	0.06706	0.02731	0
AT3G27095	0.230225	0.0597625	0.259583	Down		pseudogene of Cysteine/Histidine-rich C1 domain family protein;(source:Araport11)	0.01901	0.181	0.2153	0.2315	0.2931	0.07176	0.06069	0.1066	0
AT1G75030	146.175	77.985	0.533504	Down	THAUMATIN-LIKE PROTEIN 3 (TLP-3)	encodes a PR5-like protein	0.01913	179.4	125.7	124.5	155.1	46.35	87.94	45.75	131.9
AT4G36500	0.62675	1.77028	2.82453	Up		hypothetical protein;(source:Araport11)	0.01915	0.9276	0.3781	0.2745	0.9268	0.7941	1.967	1.934	2.386
AT2G21790	33.3225	47.19	1.41616	Up	RIBONUCLEOTIDE REDUCTASE 1 (RNR1)	encodes large subunit of ribonucleotide reductase involved in the production of deoxyribonucleoside triphosphates (dNTPs) for DNA replication and repair	0.01915	35.58	38.1	26.43	33.18	40.87	42.84	46.4	58.65
AT1G04870	12.8575	18.6775	1.45265	Up	PROTEIN ARGININE METHYLTRANSFERASE 10 (PRMT10)	Encodes a type I protein arginine methyltransferase based on the At1g04870.2 gene model. PRMT10 can catalyze the asymmetric dimethylation of arginine 3 on histone 4 and can also methylate myelin basic protein in vitro. Mutants lacking PRMT10 flower late due to defects in the autonomous pathway and they have elevated levels of FLC transcripts.	0.01919	15.34	13.38	10.07	12.64	15.92	19.88	16.75	22.16
AT1G49490	18.6352	4.841	0.259776	Down	LEUCINE-RICH REPEAT/EXTENSIN 9 (LRX9)	Pollen expressed protein required for pollen tube growth.Along with other members of the LRX family, itnteracts with RALF4 to control pollen tube growth and integrity. Loss of function results in premature pollen tube rupture and reduced fertility.	0.01927	14.21	7.388	49.39	3.553	8.593	5.412	3.012	2.347
AT2G07040	6.36775	2.09443	0.328911	Down	(PRK2A)	Pollen receptor kinase. Coexpression of AtPRK2a with AtRopGEF12 resulted in isotropic pollen tube growth.	0.01927	5.381	5.836	8.632	5.622	5.05	1.502	1.344	0.4817
AT4G31210	12.2357	19.3225	1.57918	Up		DNA topoisomerase, type IA, core;(source:Araport11)	0.01937	14.06	14.66	8.393	11.83	15.22	16.15	17.12	28.8
AT1G06670	10.152	17.8825	1.76148	Up	NUCLEAR DEIH-BOXHELICASE (NIH)	nuclear DEIH-box helicase (NIH) encoding a putative RNA and/or DNA helicase homologous to a group of nucleic acid helicases from the DEAD/H family with nuclear DEIH-box helicase (NIH) distinct N- and C-terminal regions that differ from animal DEIH proteins The mRNA is cell-to-cell mobile.	0.01937	10.71	12.18	7.158	10.56	13.21	12.69	13.77	31.86
AT3G21933	2.90125	1.452	0.500474	Down		pseudogene of cysteine-rich receptor-like kinase;(source:Araport11)	0.0194	2.271	2.901	3.071	3.362	1.43	1.227	1.384	1.767
AT2G25640	5.2095	8.388	1.61014	Up		SPOC domain / Transcription elongation factor S-II protein;(source:Araport11)	0.0194	5.501	6.159	3.489	5.689	7.357	6.595	7.53	12.07
AT3G56070	36.465	51.7275	1.41855	Up	ROTAMASE CYCLOPHILIN 2 (ROC2)	rotamase cyclophilin 2 (ROC2) exhibiting peptidyl-prolyl cis-trans isomerase activity involved in signal transduction.	0.01947	40.39	43.3	27.77	34.4	51.16	55.42	51.77	48.56
AT5G50060	4.4665	1.62295	0.363361	Down		Plant invertase/pectin methylesterase inhibitor superfamily protein;(source:Araport11)	0.01958	7.325	2.989	4.596	2.956	0.7123	2.543	0.8995	2.337
AT3G06420	17.805	10.043	0.564055	Down	AUTOPHAGY 8H (ATG8H)	Autophagy protein.	0.01958	14.03	18.76	22.12	16.31	13.7	9.465	8.933	8.074
AT5G65690	12.027	5.646	0.469444	Down	PHOSPHOENOLPYRUVATE CARBOXYKINASE 2 (PCK2)	Encodes a putative phosphoenolpyruvate carboxykinase (ATP-dependent). The mRNA is cell-to-cell mobile.	0.01958	8.296	15.74	14.52	9.552	10.06	4.737	4.971	2.816
AT5G48470	14.128	21.3775	1.51313	Up	PEP-RELATED DEVELOPMENT ARRESTED 1 (PRDA1)	hypothetical protein;(source:Araport11)	0.01958	17.46	15.22	8.592	15.24	18.44	22.26	19.71	25.1
AT3G29380	0.6781	0.226	0.333284	Down	PLANT-SPECIFIC TFIIB-RELATED PROTEIN 2 (pBRP2)	Encodes a TFIIB-related protein expressed in the reproductive organs and seeds. Loss-of-function specifically affects the development of the syncytial endosperm. It is not required for RNA polymerase IV or V activities.	0.0196	0.9834	0.9246	0.5066	0.2978	0.2552	0.2656	0.1724	0.2108
AT5G19690	49.5075	70.05	1.41494	Up	STAUROSPORIN AND TEMPERATURE SENSITIVE 3-LIKE A (STT3A)	encodes an oligosaccharyl transferase involved response to high salt. Mutants are hypersensitive to high salt conditions The mRNA is cell-to-cell mobile.	0.0196	46.04	53.13	53.39	45.47	73.17	64.03	73.11	69.89
AT5G45930	9.9395	15.36	1.54535	Up	MAGNESIUM CHELATASE I2 (CHLI2)	encodes a second Chl I gene (CHLI2), a subunit of magnesium chelatase which is required for chlorophyll biosynthesis. Has ATPase activity, regulated by TRX-f. Involved in the assembly of the Mg chelatase complex.	0.01965	12.46	10.04	7.628	9.63	14.13	12.05	14.26	21
AT5G60660	36.7025	20.8825	0.568967	Down	PLASMA MEMBRANE INTRINSIC PROTEIN 2;4 (PIP2;4)	A member of the plasma membrane intrinsic protein subfamily PIP2.When expressed in yeast cells can conduct hydrogen peroxide into those cells. Mutants exhibit longer root hairs.	0.01969	47.62	36.34	30.62	32.23	23.13	23.62	25.92	10.86
AT1G32640	7.94175	11.82	1.48834	Up	(MYC2)	Encodes a MYC-related transcriptional activator with a typical DNA binding domain of a basic helix-loop-helix leucine zipper motif. Binds to an extended G-Box promoter motif and interacts with Jasmonate ZIM-domain proteins. MYC2 interacts with EIN3 and EIL1 to repress hook curvature and resistance to Botrytis cinera.Its transcription is induced by dehydration stress, ABA treatment and blue light …	0.01971	8.777	7.921	7.438	7.631	10.81	10.64	10.12	15.71
AT4G05420	21.5825	30.7175	1.42326	Up	DAMAGED DNA BINDING PROTEIN 1A (DDB1A)	Structurally similar to damaged DNA binding proteins. DDB1a is part of a 350 KDa nuclear localized DET1 protein complex. This complex may physically interact with histone tails and while bound to chromatin- repress transcription of genes involved in photomorphogenesis. DDB1a is shown to be RUB-modified.	0.01971	22.37	24.54	19.26	20.16	27.2	26.59	29.79	39.29
AT2G33830	103.207	196.275	1.90175	Up	DORMANCY ASSOCIATED GENE 2 (DRM2)	Negative regulator of local and systemic acquired resistance; target of FLD for activation of SAR.	0.01971	185.2	61.18	107.2	59.25	176.2	196.7	238.9	173.3
AT2G40850	5.61325	1.67268	0.297987	Down	PHOSPHOINOSITIDE 4-KINASE GAMMA 1 (PI4K GAMMA 1)	phosphoinositide 4-kinase gamma 1;(source:Araport11)	0.01971	6.679	3.998	9.44	2.336	3.955	1.419	0.7879	0.5288
AT1G06620	8.7355	4.2735	0.489211	Down		encodes a protein whose sequence is similar to a 2-oxoglutarate-dependent dioxygenase The mRNA is cell-to-cell mobile.	0.0198	8.716	7.594	11.35	7.282	5.256	5.354	4.724	1.76
AT1G17540	3.35005	0.9488	0.28322	Down		kinase with adenine nucleotide alpha hydrolases-like domain-containing protein;(source:Araport11)	0.01981	4.654	1.419	6.67	0.6572	1.705	0.8219	0.5779	0.6904
AT3G02440	2.35208	0.649175	0.276001	Down	TRICHOME BIREFRINGENCE-LIKE 20 (TBL20)	Encodes a member of the TBL (TRICHOME BIREFRINGENCE-LIKE) gene family containing a plant-specific DUF231 (domain of unknown function) domain. TBL gene family has 46 members, two of which (TBR/AT5G06700 and TBL3/AT5G01360) have been shown to be involved in the synthesis and deposition of secondary wall cellulose, presumably by influencing the esterification state of pectic polymers. A nomenclature…	0.01981	2.242	2.171	4.169	0.8263	1.221	0.8083	0.1555	0.4119
AT4G24610	11.9075	16.58	1.3924	Up		pesticidal crystal cry8Ba protein;(source:Araport11)	0.01996	11.74	13.89	10.98	11.02	15.81	15.93	16.95	17.63
AT5G52820	8.14375	13.125	1.61167	Up	NOTCHLESS (NLE)	Encodes a NOTCHLESS homolog, a non-ribosomal protein involved in the maturation and assembly of the 60S ribosomal subunit, that is required for female gametogenesis. The mRNA is cell-to-cell mobile.	0.01998	9.328	8.212	5.711	9.324	10.62	10.94	11.36	19.58
AT1G78060	16.5775	23.0075	1.38788	Up		Glycosyl hydrolase family protein;(source:Araport11)	0.02006	16.89	17.72	14.41	17.29	22.91	20.77	24.57	23.78
AT1G77210	8.04825	5.1295	0.637344	Down	SUGAR TRANSPORT PROTEIN 14 (STP14)	AtSTP14 belongs to the family of sugar transport proteins (AtSTPs)in volved in monosaccharide transport. Heterologous expression in yeast revealed that AtSTP14 is the transporter specifc for galactose and does not transport other monosaccharides such as glucose or fructose.	0.02006	8.241	8.353	6.32	9.279	4.825	4.772	6.021	4.9
AT3G18845	16.65	8.6675	0.520571	Down		Encodes a Protease inhibitor/seed storage/LTP family protein [pseudogene]	0.02006	20.01	14.26	17.41	14.92	11.02	9.926	6.604	7.12
AT2G02955	1.27805	2.27875	1.78299	Up	MATERNAL EFFECT EMBRYO ARREST 12 (MEE12)	maternal effect embryo arrest 12;(source:Araport11)	0.02006	1.34	1.415	0.8782	1.479	1.877	2.309	1.977	2.952
AT1G74540	40.5825	27.5475	0.678802	Down	CYTOCHROME P450, FAMILY 98, SUBFAMILY A, POLYPEPTIDE 8 (CYP98A8)	Encodes a tricoumaroylspermidine / triferuloylspermidine meta-hydroxylase that participates in the formation of N1,N5-di(hydroxyferuloyol)- N10-sinapoyl spermidine, an important constituent of pollen. This gene appears to be expressed in young flower buds and inflorescence tips with notably high levels of expression in the tapetum and pollen.	0.02009	50.07	38.49	35.22	38.55	24.56	28.37	31.99	25.27
AT1G78930	2.22125	3.725	1.67698	Up	(MTERF16)	Mitochondrial transcription termination factor family protein;(source:Araport11)	0.02011	2.466	2.554	1.63	2.235	3.103	3.434	3.563	4.8
AT5G11110	6.718	4.33975	0.645988	Down	SUCROSE PHOSPHATE SYNTHASE 2F (SPS2F)	Encodes a protein with putative sucrose-phosphate synthase activity.Involved in pollen exine formation.	0.02011	6.046	7.934	6.235	6.657	4.679	3.166	4.558	4.956
AT1G28370	0.199352	0.6284	3.15221	Up	ERF DOMAIN PROTEIN 11 (ERF11)	encodes a member of the ERF (ethylene response factor) subfamily B-1 of ERF/AP2 transcription factor family. The protein contains one AP2 domain. There are 15 members in this subfamily including ATERF-3, ATERF-4, ATERF-7, and leafy petiole.	0.02031	0.2271	0.07251	0.1645	0.3333	0.3671	0.7589	0.548	0.8396
AT2G02690	0.575225	0.169125	0.294015	Down		Cysteine/Histidine-rich C1 domain family protein;(source:Araport11)	0.02031	0.489	0.5127	0.7361	0.5631	0.1049	0.3548	0.2168	0
AT2G33460	21.053	6.708	0.318624	Down	ROP-INTERACTIVE CRIB MOTIF-CONTAINING PROTEIN 1 (RIC1)	encodes a member of a novel protein family that contains contain a CRIB (for Cdc42/Rac-interactive binding) motif required for their specific interaction with GTP-bound Rop1 (plant-specific Rho GTPase). Interacts with Rop1 and is involved in pollen tube growth and function. Protein most similar to RIC3(family subgroup III). RIC1 is localized to the apical region of the plasma membrane in pollen t…	0.02031	20.54	14.6	40.29	8.782	15.24	5.24	3.767	2.585
AT4G17090	46.9225	65.2575	1.39075	Up	CHLOROPLAST BETA-AMYLASE (CT-BMY)	Encodes a beta-amylase targeted to the chloroplast. Transgenic BMY8 RNAi lines fail to accumulate maltose during cold shock suggesting that maltose accumulation coincides with BMY8 expression. Apart from maltose, the sugar content of the RNAi lines were similar to wildtype (glucose and sucrose unaffected).BAM3 activity declines 2 and 4 days after start of cold stress despite an increase in transc…	0.0204	44.86	53.64	40.34	48.85	60.48	59.48	76.07	65
AT4G04030	0.03962	0.2577	6.50429	Up	OVATE FAMILY PROTEIN 9 (OFP9)	transcription repressor;(source:Araport11)	0.02041	0.08525	0	0.0494	0.02383	0.1838	0.2762	0.1688	0.402
AT1G29570	0.957725	0.344925	0.36015	Down		Zinc finger C-x8-C-x5-C-x3-H type family protein;(source:Araport11)	0.02064	1.142	0.7296	0.5463	1.413	0.3694	0.2083	0.4347	0.3673
AT1G11130	23.365	33.0575	1.41483	Up	STRUBBELIG (SUB)	Encodes an atypical receptor-like kinase protein with a predicted extracellular domain of six leucine-rich repeats and an intracellular serine-threonine kinase domain expressed throughout the developing root but whose kinase activity is not essential for its function in vivo. Regulates expression of GLABRA2, CAPRICE, WEREWOLF, and ENHANCER OF GLABRA3. Required for floral organ shape, the developm…	0.02066	24.48	23.74	25.05	20.19	31.29	30.23	35.01	35.7
AT2G40700	14.8875	22.98	1.54358	Up	RNA HELICASE 17 (RH17)	DEAD-box helicase family protein. Overexpression confers tolerance to salt stress.	0.02066	15.91	16.16	10.72	16.76	19.14	20.44	19.22	33.12
AT4G10603	18.405	7.59875	0.412863	Down		Encodes a defensin-like (DEFL) family protein.	0.02067	10.19	19.75	25.98	17.7	13.07	6.604	6.285	4.436
AT1G52930	51.2325	75.0075	1.46406	Up	ARABIDOPSIS HOMOLOGUE OF YEAST BRX1 2 (ATBRX1-2)	Encodes one of two Arabidopsis orthologs of yeast BRX1, a protein involved in maturation of the large ribosomal subunit. The proteins are mainly localized in nucleolus. Mutant plants are affected in pre-rRNA processing.	0.02067	54.23	56.13	33.41	61.16	63.37	79.41	68.73	88.52
AT3G45210	32.56	19.6075	0.602196	Down		transcription initiation factor TFIID subunit (Protein of unknown function, DUF584);(source:Araport11)	0.02067	30.04	30.16	44.05	25.99	21.02	19.45	22.86	15.1
AT2G24615	1.0385	0.160175	0.154237	Down		Encodes a defensin-like (DEFL) family protein.	0.02071	0.541	0.691	1.38	1.542	0.3887	0.1315	0.1205	0
AT5G13650	69.7375	99.43	1.42578	Up	SUPPRESSOR OF VARIEGATION 3 (SVR3)	Encodes SVR3, a putative chloroplast TypA translation elongation GTPase. Loss of SVR3 suppresses variegation mediated by var2. SVR3 is essential for plants? ability to develop functional chloroplasts under chilling stress (8C), but not at normal temperature (22C).	0.02071	76.67	81.83	51.23	69.22	98.37	87.11	92.44	119.8
AT5G55820	5.84425	10.2438	1.75279	Up	WYRD (WYR)	Encodes a plant ortholog of the inner centromere protein (INCENP), which is implicated in the control of chromosome segregation and cytokinesis in yeast and animals. Required for female gametophytic cell specification and seed development.	0.02071	6.019	6.884	4.517	5.957	7.304	7.342	8.119	18.21
AT2G02061	3.5445	1.75775	0.495909	Down		Nucleotide-diphospho-sugar transferase family protein;(source:Araport11)	0.02071	3.836	3.653	4.225	2.464	2.305	1.663	1.765	1.298
AT5G54855	17.3175	10.9425	0.631875	Down		Pollen Ole e 1 allergen and extensin family protein;(source:Araport11)	0.02073	17.38	15.54	15.45	20.9	10.08	11.4	10.63	11.66
AT4G24750	35.175	49.75	1.41436	Up		Rhodanese/Cell cycle control phosphatase superfamily protein;(source:Araport11)	0.02075	38.99	35.82	34	31.89	47.66	43.67	49.39	58.28
AT3G62170	338.725	168.675	0.49797	Down	VANGUARD 1 HOMOLOG 2 (VGDH2)	VANGUARD-like protein;(source:Araport11)	0.02076	224.8	358.5	447.4	324.2	294.5	127.6	150.1	102.5
AT5G05850	19.8625	11.5435	0.581171	Down	PLANT INTRACELLULAR RAS GROUP-RELATED LRR 1 (PIRL1)	Encodes PIRL1, a member of the Plant Intracellular Ras-group-related LRRs (Leucine rich repeat proteins). PIRLs are a distinct, plant-specific class of intracellular LRRs that likely mediate protein interactions, possibly in the context of signal transduction. PIRL1 (AT5G05850) and PIRL9 (AT3G11330) are genetically redundant and are required for differentiation of microspores into pollen.	0.02079	13.99	21.12	24.86	19.48	15.55	10.54	11.93	8.154
AT5G07770	22.54	14.145	0.627551	Down	FORMIN HOMOLOG 16 (FH16)	Actin-binding FH2 protein;(source:Araport11)	0.02087	21.96	19.31	30.12	18.77	14.59	16.18	14	11.81
AT3G59070	1.2758	0.526825	0.412937	Down		Cytochrome b561/ferric reductase transmembrane with DOMON related domain-containing protein;(source:Araport11)	0.02088	1.311	1.561	0.6282	1.603	0.5664	0.455	0.6804	0.4055
AT3G62530	188.05	262.2	1.39431	Up		ARM repeat superfamily protein;(source:Araport11)	0.02089	192.7	192.7	196.9	169.9	247.2	265.2	255.2	281.2
AT2G25700	1.09308	0.3871	0.354139	Down	SKP1-LIKE 3 (SK3)	E3 ubiquitin ligase SCF complex subunit SKP1/ASK1 (At3), putative, E3 ubiquitin ligase; similar to fimbriata-associated protein fap1 GI:2673868 from (Antirrhinum majus. Interacts with F-box proteins.	0.02089	1.598	0.7681	0.5882	1.418	0.3511	0.5025	0.4047	0.2901
AT1G23590	8.2025	4.72725	0.576318	Down		OBP32pep protein, putative (Domain of unknown function DUF220);(source:Araport11)	0.02089	5.911	10.24	7.085	9.574	4.597	4.596	3.965	5.751
AT3G55540	9.58525	5.79875	0.604966	Down		nuclear transport factor 2 (NTF2) family protein;(source:Araport11)	0.02089	9.105	9.25	9.786	10.2	5.65	6.035	6.791	4.719
AT5G55220	3.68925	6.23825	1.69093	Up	(TIG1)	trigger factor type chaperone family protein;(source:Araport11)	0.02091	5.046	4.014	2.591	3.106	4.824	5.989	5.658	8.482
AT5G42760	4.88925	2.57325	0.526308	Down		Leucine carboxyl methyltransferase;(source:Araport11)	0.02102	4.404	5.177	3.444	6.532	2.501	3.379	2.639	1.774
AT1G08450	24.6725	35.795	1.45081	Up	CALRETICULIN 3 (CRT3)	Encodes one of three Arabidopsis calreticulins. In CRT-deficient mouse fibroblasts, this protein restores ER Ca2+ levels. Non-receptor component required for EFR-mediated immunity. Mutants show de-repressed anthocyanin accumulation in the presence of elf18, and EFR accumulation and signalling.	0.0211	26.22	27.78	18.53	26.16	29.46	35.22	33.36	45.14
AT3G11930	34.1225	19.82	0.580848	Down		Adenine nucleotide alpha hydrolases-like superfamily protein;(source:Araport11)	0.02113	34.21	35.19	43.89	23.2	24.34	22.96	19.04	12.94
AT4G13494	10.0922	18.2325	1.80658	Up	MICRORNA863A (MIR863A)	Encodes a microRNA of unknown function. MicroRNAs are regulatory RNAs with a mature length of ~21-nucleotides that are processed from hairpin precursors by Dicer-like enzymes. MicroRNAs can negatively regulate gene expression by attenuating translation or by directing mRNA cleavage. Mature sequence: UUGAGAGCAACAAGACAUAAU	0.02117	14.11	8.664	6.755	10.84	15.11	21.58	18.32	17.92
AT2G43110	34.5525	48.5825	1.40605	Up		U3 containing 90S pre-ribosomal complex subunit;(source:Araport11)	0.02124	34.21	39.2	30.17	34.63	45.8	56.94	45.44	46.15
AT2G17890	1.97225	0.770875	0.390861	Down	CALCIUM-DEPENDENT PROTEIN KINASE 16 (CPK16)	Encodes a member of Calcium Dependent Protein Kinase. Protein is N-myristoylated. Localizes to the plasma membrane. Localizes to the chloroplast when the myristoylation motif is mutated.	0.02124	2.27	1.7	2.91	1.009	1.187	0.9357	0.5895	0.3713
AT3G15860	1.58803	0.418325	0.263425	Down		plant self-incompatibility protein S1 family protein;(source:Araport11)	0.02132	0.9681	1.374	2.431	1.579	1.005	0.1307	0.3993	0.1383
AT1G74950	145.525	97.65	0.671019	Down	(TIFY10B)	Key regulator in alternative splicing in the jasmonate signaling pathway, alone and in collaboration with other regulators.	0.02135	140.3	130.3	160.1	151.4	106.5	107.4	100.6	76.1
ATCG00590	11.1952	24.0175	2.14533	Up	(ORF31)	electron carrier;(source:Araport11)	0.02135	10.2	12.11	12.83	9.641	18.59	18.86	21.66	36.96
AT2G47180	15.3525	9.295	0.605439	Down	GALACTINOL SYNTHASE 1 (GolS1)	GolS1 is a galactinol synthase that catalyzes the formation of galactinol from UDP-galactose and myo-inositol. GolS1 transcript levels rise in response to methyl viologen, an oxidative damage-inducing agent. Plants over-expressing GolS1 have increased tolerance to salt, chilling, and high-light stress.	0.02137	18.94	15.31	10.64	16.52	12.51	7.519	8.932	8.219
AT3G55990	17.1775	11.1775	0.650706	Down	ESKIMO 1 (ESK1)	Encodes ESK1 (Eskimo1). A member of a large gene family of DUF231 domain proteins whose members encode a total of 45 proteins of unknown function. ESK1 functions as a negative regulator of cold acclimation. Mutations in the ESK1 gene provides strong freezing tolerance. A member of the TBL (TRICHOME BIREFRINGENCE-LIKE) gene family containing a plant-specific DUF231 (domain of unknown function) dom…	0.02137	12.53	18.03	18.16	19.99	12.25	11.16	10.75	10.55
AT3G19440	13.2625	18.91	1.42582	Up		Pseudouridine synthase family protein;(source:Araport11)	0.02139	13.61	14.25	12.01	13.18	16.83	19.05	16.65	23.11
AT1G18500	10.2452	14.73	1.43774	Up	METHYLTHIOALKYLMALATE SYNTHASE-LIKE 4 (MAML-4)	Encodes an active Arabidopsis isopropylmalate synthase IPMS1. Involved in leucine biosynthesis. Do not participate in the chain elongation of glucosinolates. Expressed constitutively throughout the plant. Loss of IPMS1 can be compensated by a second isopropylmalate synthase gene IPMS2 (At1g74040). The mRNA is cell-to-cell mobile.	0.0214	10.09	10.78	8.841	11.27	13.78	12.16	14.98	18
AT5G23910	17.715	25.0325	1.41307	Up		ATP binding microtubule motor family protein;(source:Araport11)	0.02146	17.95	19.42	16.84	16.65	24.87	21.59	23.95	29.72
AT3G51070	11.3187	5.4855	0.484638	Down		S-adenosyl-L-methionine-dependent methyltransferases superfamily protein;(source:Araport11)	0.02153	5.775	14.08	13.48	11.94	9.426	3.64	4.721	4.155
AT4G34830	10.4592	15.6025	1.49174	Up	MATURATION OF RBCL 1 (MRL1)	Encodes MRL1, a conserved pentatricopeptide repeat protein, required for stabilization of rbcL mRNA.	0.02153	12.48	12.69	7.538	9.129	14.36	13.56	14.48	20.01
AT4G25940	7.0175	3.644	0.519273	Down	(PICALM2B)	ENTH/ANTH/VHS superfamily protein;(source:Araport11)	0.02153	5.151	7.007	9.998	5.914	5.095	3.666	3.676	2.139
AT3G28153	1.814	2.922	1.6108	Up		transposable_element_gene;(source:Araport11);non-LTR retrotransposon family (LINE), has a 1.3e-30 P-value blast match to GB:AAB41224 ORF2 (LINE-element) (Rattus norvegicus);(source:TAIR10)	0.02155	2.018	1.961	1.617	1.66	2.445	2.504	2.409	4.33
AT3G02060	14.8125	21.2475	1.43443	Up		DEAD/DEAH box helicase;(source:Araport11)	0.02157	17.06	16.56	12.03	13.6	19.09	18.5	20.9	26.5
AT4G36590	0.36795	0.0976225	0.265315	Down	AGAMOUS-LIKE 40 (AGL40)	MADS-box transcription factor family protein;(source:Araport11)	0.02157	0.4441	0.3191	0.2896	0.419	0.03989	0.1349	0.1443	0.0714
AT2G29950	5.0095	2.53725	0.506488	Down	ELF4-LIKE 1 (ELF4-L1)	Member of a small family of proteins containing DUF1313 domain. Involved in flowering time.	0.02157	3.404	5.984	5.919	4.731	2.935	2.285	2.636	2.293
AT2G13550	0.3494	0.87055	2.49156	Up		hypothetical protein;(source:Araport11)	0.02157	0.3285	0.5034	0.4188	0.1469	0.8654	0.7185	0.7723	1.126
AT1G24575	16.6925	8.68425	0.520249	Down		DEAD-box ATP-dependent RNA helicase-like protein;(source:Araport11)	0.02157	13.4	22.23	14.34	16.8	10.5	10.47	9.017	4.75
AT1G13970	7.09575	2.981	0.420111	Down		beta-hexosaminidase (DUF1336);(source:Araport11)	0.02159	6.279	6.463	9.93	5.711	6.209	2.208	2.053	1.454
AT5G16570	2.1325	1.09635	0.514115	Down	GLUTAMINE SYNTHETASE 1;4 (GLN1;4)	Encodes a cytosolic glutamine synthetase, the enzyme has high affinity with substrate ammonium	0.02167	1.988	2.414	2.015	2.113	1.186	1.294	0.9275	0.9779
AT1G50030	13.5825	19.405	1.42868	Up	TARGET OF RAPAMYCIN (TOR)	Related to TOR proteins from yeast and mammals, regulators of cell growth in response to nutrient availability. TOR proteins belong to the family of phosphatidylinositol 3-kinase and are targets of the antiproliferative drug rapamycin. AtTOR binds the yeast FKBP12 protein in the presence of Rapamycin, is involved in embryogenesis and is expressed in embryos, endosperm and meristems. Participates …	0.02172	14.6	15.92	12.2	11.61	18.39	16.09	18.89	24.25
AT5G26150	0.71868	0.11407	0.158722	Down		protein kinase family protein;(source:Araport11)	0.02172	0.765	0.476	1.546	0.08772	0.2819	0.143	0.01456	0.01682
AT3G45780	12.27	18.5075	1.50835	Up	PHOTOTROPIN 1 (PHOT1)	Blue-light photoreceptor. Contains a light activated serine-threonine kinase domain and LOV1 and LOV2 repeats. Mutants are defective in blue-light response. Mediates blue light-induced growth enhancements. PHOT1 and PHOT2 mediate blue light-dependent activation of the plasma membrane H+-ATPase in guard cell protoplasts. PHOT1 undergoes blue-light-dependent autophosphorylation. At least eight phos…	0.02176	13.81	13.43	10.96	10.88	16.06	15	16.68	26.29
AT1G24657	3.433	0.707675	0.206139	Down		pseudogene of Plant self-incompatibility protein S1 family;(source:Araport11)	0.02177	4.132	3.277	4.982	1.341	1.006	1.701	0.1237	0
ATCG00660	3.67	8.91	2.42779	Up	RIBOSOMAL PROTEIN L20 (RPL20)	encodes a chloroplast ribosomal protein L20, a constituent of the large subunit of the ribosomal complex	0.0218	4.715	3.683	4.517	1.765	5.992	7.293	6.915	15.44
AT4G21100	8.17725	11.8	1.44303	Up	DAMAGED DNA BINDING PROTEIN 1B (DDB1B)	One of two closely related genes similar to a damaged DNA binding protein originally described in mammals. May form a complex with DET1 to regulate photomorphogenesis. Loss of function mutations are lethal. The DDB1b protein binds with a number of DWD-containing proteins and may form part of a CUL4-based E3 ubiquitin ligase.	0.02184	9.692	9.41	6.11	7.497	10.78	10.69	11.84	13.89
AT3G19090	23.5225	12.7907	0.543767	Down	LA RELATED PROTEIN 6C (LARP6C)	RNA-binding protein;(source:Araport11)	0.02187	14.65	26.81	28.18	24.45	19.83	8.713	10.68	11.94
AT5G24420	62.78	40.16	0.639694	Down	6-PHOSPHOGLUCONOLACTONASE 5 (PGL5)	Encodes a cytosolic 6-phosphogluconolactonase (PGL) thought to be involved in the oxidative pentose-phosphate pathway (OPPP).	0.02187	83.26	56.8	52.55	58.51	49.77	42.93	37.49	30.45
AT3G18220	11.9745	4.58975	0.383294	Down	LIPID PHOSPHATE PHOSPHATASE 4 (LPP4)	Phosphatidic acid phosphatase (PAP2) family protein;(source:Araport11)	0.02187	11.33	10.71	20	5.858	8.449	4.577	3.756	1.577
ATMG00960	0.09347	0.53985	5.77565	Up	(CCB203)	Encodes a protein of the mitochondrial membrane which has been shown to be present in a number of unidentified complexes including a 500-KDa complex postulated to have heme lyase activity, in which another protein (AtCCMH, AT1G15220) is also involved. cytochrome c biogenesis orf203.	0.02187	0.1803	0.1152	0.07838	0	0.4535	0.1096	0.5523	1.044
AT5G66960	4.42375	7.0305	1.58926	Up		Prolyl oligopeptidase family protein;(source:Araport11)	0.022	4.655	5.079	3.003	4.958	5.231	7.495	6.197	9.199
AT5G44300	223.425	108.338	0.484894	Down		Dormancy/auxin associated family protein;(source:Araport11)	0.02208	124.9	238.6	324.5	205.7	168.7	101.7	110.6	52.35
AT4G12960	59.1325	23.6905	0.400634	Down	GAMMA-INTERFERON-RESPONSIVE LYSOSOMAL THIOL REDUCTASE (GILT)	Gamma interferon responsive lysosomal thiol (GILT) reductase family protein;(source:Araport11)	0.02208	49.17	39.79	110.1	37.47	37.98	32.76	14.12	9.902
AT3G15357	4.716	8.064	1.70992	Up		phosphopantothenoylcysteine decarboxylase subunit;(source:Araport11)	0.02217	4.452	5.389	4.434	4.589	8.03	8.002	8.71	7.514
AT4G01930	1.69975	0.837325	0.492617	Down		Cysteine/Histidine-rich C1 domain family protein;(source:Araport11)	0.02219	1.781	1.501	1.746	1.771	0.8294	0.9751	1.056	0.4888
AT3G17360	1.5385	2.76375	1.79639	Up	PHRAGMOPLAST ORIENTING KINESIN 1 (POK1)	PHRAGMOPLAST ORIENTING KINESIN 1 is one of the two Arabidopsis homologs isolated in yeast two-hybrid screen for interaction partners of maize gene TANGLED1 (TAN1). Based on sequence homology in their motor domains, POK1 and POK2 belong to the kinesin-12 class which also includes the well-characterized group of phragmoplast-associated kinesins AtPAKRPs. Both kinesins are composed of an N-terminal …	0.02219	1.975	1.743	1.032	1.404	1.9	2.149	2.326	4.68
AT3G11165	8.5595	3.832	0.44769	Down		hypothetical protein;(source:Araport11)	0.02227	6.444	9.544	10.03	8.22	5.087	2.794	5.346	2.101
AT3G22750	3.08625	1.47225	0.477035	Down		Protein kinase superfamily protein;(source:Araport11)	0.02227	4.825	2.647	2.869	2.004	2.201	1.364	1.034	1.29
AT4G34200	54.7525	74.9375	1.36866	Up	EMBRYO SAC DEVELOPMENT ARREST 9 (EDA9)	Encodes a 3-phosphoglycerate dehydrogenase that is essential for embryo and pollen development.	0.02228	54.32	58.83	49.03	56.83	78.4	70.09	82	69.26
AT5G63570	25.3	34.965	1.38202	Up	GLUTAMATE-1-SEMIALDEHYDE-2,1-AMINOMUTASE (GSA1)	Encodes a protein with homology to glutamate-1-semialdehyde 2,1-aminomutase catalyzing the conversion of glutamate-1-semialdehyde (GSA) into 5-amino levulinate. The expression of this gene was demonstrated to be light-induced. The mRNA is cell-to-cell mobile.	0.02237	28	27.77	20.96	24.47	32.51	33.1	36.55	37.7
AT5G59040	9.6825	5.3105	0.548464	Down	COPPER TRANSPORTER 3 (COPT3)	encodes a member of copper transporter family and functionally complements a high affinity copper transporter mutant in yeast	0.02247	10.72	9.362	8.608	10.04	4.594	5.316	7.066	4.266
AT3G05890	26.0875	14.8	0.567322	Down	RARE-COLD-INDUCIBLE 2B (RCI2B)	Low temperature and salt responsive protein family;(source:Araport11)	0.0225	20.54	22.19	35.26	26.36	14.84	16.95	15	12.41
ATMG01120	38.875	70.9625	1.8254	Up			0.02255	49.32	39.76	25.48	40.94	56.13	48.14	53.88	125.7
AT5G36150	2.70125	1.5765	0.583619	Down	PUTATIVE PENTACYCLIC TRITERPENE SYNTHASE 3 (PEN3)	putative pentacyclic triterpene synthase 3;(source:Araport11)	0.02256	2.801	3.153	2.223	2.628	1.522	1.441	1.756	1.587
AT1G54070	24.514	4.76318	0.194304	Down		Dormancy/auxin associated family protein;(source:Araport11)	0.02259	33.46	9.868	50.89	3.838	11.06	5.723	1.502	0.7677
AT5G41390	3.163	0.861025	0.272218	Down		PLAC8 family protein;(source:Araport11)	0.02261	2.525	2.674	5.511	1.942	1.752	1.227	0.3384	0.1267
AT5G08600	1.74165	3.34925	1.92303	Up		U3 ribonucleoprotein (Utp) family protein;(source:Araport11)	0.02261	1.86	1.704	0.9196	2.483	2.418	3.021	2.746	5.212
AT3G23380	0.4434	0.0825175	0.186102	Down	ROP-INTERACTIVE CRIB MOTIF-CONTAINING PROTEIN 5 (RIC5)	encodes a member of a novel protein family that contains contain a CRIB (for Cdc42/Rac-interactive binding) motif required for their specific interaction with GTP-bound Rop1 (plant-specific Rho GTPase). Interacts with Rop1 and is involved in pollen tube growth and function. Gene is expressed predominantly in inflorescence and flower tissue.	0.02273	0.2607	0.5752	0.6594	0.2783	0.1363	0.1152	0.0176	0.06097
AT5G54800	55.88	36.22	0.648175	Down	GLUCOSE 6-PHOSPHATE/PHOSPHATE TRANSLOCATOR 1 (GPT1)	Encodes glucose6-Phosphate/phosphate transporter 1. Essential for pollen maturation and embryo sac development. The mRNA is cell-to-cell mobile.	0.02275	52.52	53.8	70.35	46.85	38.48	38.68	39.48	28.24
AT4G36640	28.92	19.3775	0.670038	Down		Sec14p-like phosphatidylinositol transfer family protein;(source:Araport11)	0.02275	26.38	29.02	32.99	27.29	18.86	20.59	21.67	16.39
AT3G48500	9.62325	15.51	1.61172	Up	PIGMENT DEFECTIVE 312 (PDE312)	PEP complex component.	0.02276	13.24	10.48	6.705	8.068	11.55	13.76	14.19	22.54
AT4G29658	1.42562	0.32128	0.225361	Down	PRENYLATED RAB ACCEPTOR 1.C (PRA1.C)	prenylated RAB acceptor 1.C;(source:Araport11)	0.02279	1.796	1.606	1.457	0.8435	0.8777	0.08732	0.3201	0
AT2G21510	10.5377	6.65725	0.631753	Down		DNAJ heat shock N-terminal domain-containing protein;(source:Araport11)	0.02279	10.04	11.69	8.431	11.99	7.329	6.249	7.271	5.78
AT3G55010	25.1125	34.995	1.39353	Up	(PUR5)	encoding phosphoribosylformylglycinamidine cyclo-ligase (syn. AIR synthetase)that phosphorylates 5-phosphoribosyl-N-formylglycinamidine (FGAM) to form 5-aminoimidazole ribonucleotide (AIR)	0.02282	27.53	27.7	22.08	23.14	35.03	34.89	38.83	31.23
AT5G42950	17.545	26.365	1.50271	Up	ESSENTIAL FOR POTEXVIRUS ACCUMULATION 1 (EXA1)	EXA1 is a GYF domain-containing gene of the SMY2 subgroup. Mutants exhibit resistance to potexviruses.	0.02292	20.04	19.91	14.21	16.02	23.52	20.54	23.47	37.93
AT3G58310	6.94375	3.15775	0.454761	Down		cysteine-rich repeat secretory protein, putative (DUF26);(source:Araport11)	0.02295	4.297	7.46	10.39	5.628	4.593	2.244	3.282	2.512
AT3G15930	0.412225	0.9147	2.21893	Up		Pentatricopeptide repeat (PPR) superfamily protein;(source:Araport11)	0.02301	0.4487	0.4105	0.5201	0.2696	0.7314	0.6836	0.9348	1.309
AT4G33640	91.0825	58.21	0.639091	Down		costars family protein;(source:Araport11)	0.02306	96.59	82.6	71.04	114.1	58.18	75.28	54.71	44.67
AT1G20120	109.392	75.6075	0.691158	Down		GDSL-motif esterase/acyltransferase/lipase. Enzyme group with broad substrate specificity that may catalyze acyltransfer or hydrolase reactions with lipid and non-lipid substrates.	0.02313	108.3	118.6	112.2	98.47	75.71	71.32	89.53	65.87
AT1G33410	8.14625	12.8768	1.5807	Up	SUPPRESSOR OF AUXIN RESISTANCE1 (SAR1)	Encodes a nucleoporin that regulates CONSTANS (CO) protein stability through affecting nuclear pore complex localization of an E3-ubiquitin ligase, HIGH EXPRESSION OF OSMOTICALLY RESPONSIVE GENES1 (HOS1), which destabilizes CO protein in the morning period.	0.02314	9.028	9.523	5.495	8.539	9.887	11	11.21	19.41
AT5G26920	0.0980225	0.416017	4.2441	Up	CAM-BINDING PROTEIN 60-LIKE G (CBP60G)	Encodes a calmodulin-binding protein CBP60g (calmodulin binding protein 60-like.g). The calmodulin-binding domain is located near the N-terminus; calmodulin binding is dependent on Ca(2+). Inducible by both bacterial pathogen and MAMP (microbe-associated molecular pattern) treatments. Bacterial growth is enhanced in cbp60g mutants. cbp60g mutants also show defects in salicylic acid (SA) accumulat…	0.02324	0.1373	0.1503	0.06063	0.04386	0.06577	0.5244	0.233	0.8409
AT3G56800	90.095	61.41	0.681614	Down	CALMODULIN 3 (CAM3)	encodes a calmodulin	0.02327	81.35	91.05	78.58	109.4	57.59	73.8	60.96	53.29
AT1G01980	6.5565	0.904445	0.137946	Down	(ATBBE1)	Encodes an oligogalacturonide oxidase that inactivates the elicitor-active oligogalacturonides (OGs).	0.02327	9.235	2.397	13.38	1.214	2.795	0.6229	0.04478	0.1551
AT2G35570	0.10439	0.3141	3.00891	Up		pseudogene of Serine protease inhibitor (SERPIN) family protein;(source:Araport11)	0.02336	0.1961	0.07773	0.1097	0.03403	0.2818	0.2301	0.3966	0.3479
AT2G15340	3.12443	0.503633	0.161192	Down		glycine-rich protein;(source:Araport11)	0.02336	3.572	3.008	5.31	0.6077	0.7811	1.195	0.03843	0
AT3G22050	10.3905	4.61625	0.444276	Down		cysteine-rich repeat secretory protein, putative (DUF26);(source:Araport11)	0.02339	5.682	11.09	14.61	10.18	7.552	4.143	4.35	2.42
AT5G16290	32.21	44.445	1.37985	Up	VALINE-TOLERANT 1 (VAT1)	Encodes a regulatory subunit of acetohydroxy acid synthase (AHAS), the ﬁrst committed enzyme in the branched chain amino acid biosynthesis pathway.	0.02339	35.79	36.32	26.8	29.93	41.98	40.72	44.3	50.78
AT3G62590	16.9475	11.635	0.686532	Down	PLASTID LIPAS3 (PLIP3)	PLIP3 is a glycerolipid A1 lipase with substrate specificity for phosphatidylglycerol. Expression is induced by ABA.	0.02339	17.15	18.67	13.89	18.08	11.6	10.73	10.71	13.5
AT5G65870	43.9775	18.0903	0.411352	Down	PHYTOSULFOKINE 5 PRECURSOR (PSK5)	Probable phytosulfokines 5 precursor, coding for a unique plant peptide growth factor.	0.02341	37.09	32.56	79.17	27.09	27.64	23.84	14.49	6.391
AT1G55850	3.764	5.74225	1.52557	Up	CELLULOSE SYNTHASE LIKE E1 (CSLE1)	encodes a protein similar to cellulose synthase The mRNA is cell-to-cell mobile.	0.02355	3.512	4.462	3.606	3.476	5.458	5.269	5.33	6.912
AT1G10060	54.9275	37.895	0.689909	Down	BRANCHED-CHAIN AMINO ACID TRANSAMINASE 1 (BCAT-1)	encodes a mitochondrial branched-chain amino acid aminotransferase. Complements the yeast leu/iso-leu/val auxotrophy mutant.	0.02355	57.09	51.96	45.85	64.81	37.9	43.29	37.83	32.56
AT4G29740	0.4153	0.86275	2.07741	Up	CYTOKININ OXIDASE 4 (CKX4)	It encodes a protein whose sequence is similar to cytokinin oxidase/dehydrogenase, which catalyzes the degradation of cytokinins.	0.02355	0.4912	0.4336	0.3851	0.3513	0.7266	0.79	0.7454	1.189
ATCG00210	21.71	44.2925	2.04019	Up	(YCF6)	electron transporter, transferring electrons within cytochrome b6/f complex of photosystem II;(source:Araport11)	0.02355	22.69	19.77	28.96	15.42	42.95	34.27	36.87	63.08
AT3G61100	58.465	83.4525	1.42739	Up		Putative endonuclease or glycosyl hydrolase;(source:Araport11)	0.02358	66.59	56.6	45.73	64.94	73.04	98.46	89.34	72.97
AT3G16415	0.178025	0.03719	0.208903	Down		pseudogene of myrosinase-binding protein 2;(source:Araport11)	0.02359	0.2516	0.1969	0.1411	0.1225	0.02332	0.05917	0.06627	0
AT3G19970	6.84025	4.34	0.63448	Down		alpha/beta-Hydrolases superfamily protein;(source:Araport11)	0.02361	6.868	8.143	5.471	6.879	4.812	4.259	3.82	4.469
AT2G42560	0.12101	0.01739	0.143707	Down	LATE EMBRYOGENESIS ABUNDANT 25 (LEA25)	Late embryogenesis protein. Based on in vitro studies, likely plays a role in stablizing membranes in response to freezing stress.	0.02362	0.07629	0.1462	0.05895	0.2026	0	0.01545	0.03776	0.01635
AT5G05270	102.997	63.375	0.615306	Down	CHALCONE ISOMERASE LIKE (CHIL)	Chalcone-flavanone isomerase family protein;(source:Araport11)	0.02366	86.48	97.09	78.22	150.2	62.41	79.35	64.44	47.3
AT3G15353	1028.3	663.45	0.645191	Down	METALLOTHIONEIN 3 (MT3)	metallothionein, binds to and detoxifies excess copper and other metals, limiting oxidative damage	0.02369	907.8	1049	984.4	1172	693.4	830.9	659.3	470.2
AT5G03250	11.5903	7.665	0.661332	Down		Phototropic-responsive NPH3 family protein;(source:Araport11)	0.02369	9.97	13.19	9.861	13.34	7.967	6.333	7.933	8.427
AT4G24026	14.425	8.02425	0.556274	Down		hypothetical protein;(source:Araport11)	0.02369	12.8	10.65	17.61	16.64	7.111	7.908	6.908	10.17
AT2G29350	0.3463	1.2284	3.54721	Up	SENESCENCE-ASSOCIATED GENE 13 (SAG13)	Encodes a senescence associated protein required for resistance against fungal pathogens. Negative regulator of defense against bacterial pathogens. Induced by ROS. Required for defense against ROS and fungal pathogens most likely by activating anthocyanin biosynthesis.	0.02379	0.3394	0.2797	0.5457	0.2204	0.8811	2.954	0.4308	0.6477
AT2G25730	9.6105	14.255	1.48327	Up		zinc finger FYVE domain protein;(source:Araport11)	0.02383	10.03	11.35	7.731	9.331	13.17	11.32	12.35	20.18
AT1G77730	2.7887	0.904925	0.324497	Down		Pleckstrin homology (PH) domain superfamily protein;(source:Araport11)	0.02393	2.61	2.318	5.27	0.9568	1.64	0.7983	0.6033	0.5781
AT1G51770	0.99055	0.39575	0.399526	Down		Core-2/I-branching beta-1,6-N-acetylglucosaminyltransferase family protein;(source:Araport11)	0.02393	0.7898	1.372	0.7934	1.007	0.6205	0.4607	0.258	0.2438
AT3G61410	1.2035	0.5128	0.426091	Down		U-box kinase family protein;(source:Araport11)	0.02397	1.209	0.9174	0.8326	1.855	0.5735	0.5819	0.3386	0.5572
AT1G66760	1.6433	3.3865	2.06079	Up		MATE efflux family protein;(source:Araport11)	0.02397	3.108	1.384	1.204	0.8772	3.704	3.279	3.619	2.944
AT2G25344	7.086	2.4915	0.351609	Down	LOW-MOLECULAR-WEIGHT CYSTEINE-RICH 14 (LCR14)	Encodes a member of a family of small,secreted, cysteine rich protein with sequence similarity to the PCP (pollen coat protein) gene family.	0.02402	3.104	8.883	9.994	6.363	4.13	1.257	1.622	2.957
AT4G11030	11.3357	6.81	0.600754	Down	LONG-CHAIN ACYL-COENZYME A SYNTHETASE 5 (LACS5)	AMP-dependent synthetase and ligase family protein;(source:Araport11)	0.02414	7.263	15.06	11.34	11.68	7.97	5.281	6.857	7.132
AT4G16700	5.5445	8.243	1.4867	Up	PHOSPHATIDYLSERINE DECARBOXYLASE 1 (PSD1)	Encodes a mitochondrial phosphatidylserine decarboxylase. Expressed mainly in roots and flowers.	0.02416	6.351	5.873	4.133	5.821	7.793	8.498	8.535	8.146
AT5G64572	11.5925	6.8975	0.594997	Down		Natural antisense transcript overlaps with AT5G64570;(source:Araport11)	0.02417	12.95	11.12	11.93	10.37	7.047	6.877	9.263	4.403
AT3G23670	10.9505	17.3075	1.58052	Up	(KINESIN-12B)	Microtubule motor kinesin PAKRP1L/Kinesin-12B. Together with PAKRP1/Kinesin-12A, serve as linkers of the plus ends of antiparallel microtubules in the phragmoplast.	0.02417	11.46	13.33	7.312	11.7	13.58	14.12	15.56	25.97
AT3G54470	12.385	17.5025	1.4132	Up		encodes the bi-functional orotate phosphoribosyltransferase/orotidine-5'-phosphate decarboxylase catalyzing the fifth and sixth step in the de novo pyrimidine ribonucleotide biosynthesis	0.02417	13.06	14.87	11.06	10.55	16.89	16.31	17.63	19.18
AT2G47160	87.475	61.06	0.698028	Down	REQUIRES HIGH BORON 1 (BOR1)	Encodes a key transporter under boron (B) limitation in the soil. Protein accumulates in shoots and roots under conditions of boron deficiency and is degraded within several hours of restoring boron supply. Localized to the plasma membrane under B limitation, and to the cytoplasm after B application before degradation. Protein is transferred via the endosomes to the vacuole for degradation. Local…	0.02427	81.15	93.87	91.16	83.72	62.45	64.61	64.01	53.17
AT2G44120	221.25	318.225	1.43831	Up		Ribosomal protein L30/L7 family protein;(source:Araport11)	0.02429	231.3	223.4	231.2	199.1	317.8	348.1	353.4	253.6
AT3G06778	39.3425	22.725	0.57762	Down		Chaperone DnaJ-domain superfamily protein;(source:Araport11)	0.0243	34.21	40.34	44.37	38.45	35.88	19.35	20.44	15.23
AT2G17930	16.3825	24.2825	1.48222	Up	(TRA1A)	Component of the SPT module of the SAGA complex.	0.0243	17.41	19.51	14.27	14.34	21.81	19.36	22.44	33.52
AT4G22545	2.80625	1.27117	0.45298	Down		pseudogene of expressed protein;(source:Araport11)	0.0243	2.442	2.582	3.299	2.902	1.929	1.376	0.8645	0.9152
AT4G00620	11.8275	16.6625	1.40879	Up	EMBRYO DEFECTIVE 3127 (EMB3127)	Amino acid dehydrogenase family protein;(source:Araport11)	0.0243	13.42	12.25	10.61	11.03	15	18	18.22	15.43
AT3G53640	0.3735	0.15155	0.405756	Down		Protein kinase superfamily protein;(source:Araport11)	0.02437	0.3217	0.4656	0.3231	0.3836	0.1335	0.2085	0.1539	0.1103
AT5G09570	41.84	21.8375	0.521929	Down	(AT12CYS-2)	Twin CX9C domain protein. Induced by low phosphate or iron, drought and heat stress. Loss of both At12cys-1 and At12cys-2 lead to enhanced tolerance to drought and light stress and increased anti-oxidant capacity.	0.02437	35.05	34.55	63.94	33.82	22.93	24.22	29.22	10.98
AT1G54280	4.97675	2.639	0.530266	Down	AMINOPHOSPHOLIPID ATPASE 6 (ALA6)	Encodes a member of the P4 subfamily of P-type ATPases expressed in the pollen plasma membrane. Double mutants with ALA7 display pollen and pollen tube defects.	0.02444	3.639	5.638	6.427	4.203	4.196	1.916	2.644	1.8
AT5G22650	147.225	203.5	1.38224	Up	HISTONE DEACETYLASE 2B (HD2B)	Encodes a member of a plant-specific class of histone deacetylases. Controls the development of adaxial/abaxial leaf polarity. Its mRNA is widely expressed in stems, leaves, flowers and young siliques. Plant lines expressing RNAi constructs directed against this gene showed a marked reduction in agrobacterium-mediated root transformation.	0.02444	155	147.4	148.5	138	179.8	207	221.9	205.3
AT1G29920	1131.25	1614.5	1.42718	Up	CHLOROPHYLL A/B-BINDING PROTEIN 2 (CAB2)	Encodes lhcb1.1 a component of the LHCIIb light harvesting complex associated with photosystem II.	0.02444	1257	1056	1047	1165	1511	1557	1613	1777
AT1G54620	0.927625	0.214985	0.231759	Down		Plant invertase/pectin methylesterase inhibitor superfamily protein;(source:Araport11)	0.02448	0.2811	1.645	0.8416	0.9428	0.4376	0.1708	0.1913	0.06024
AT4G08930	7.804	4.7575	0.609623	Down	APR-LIKE 6 (APRL6)	Encodes a protein disulfide isomerase-like (PDIL) protein, a member of a multigene family within the thioredoxin (TRX) superfamily. This protein also belongs to the adenosine 5'-phosphosulfate reductase-like (APRL) group. The mRNA is cell-to-cell mobile.	0.0245	8.557	8.492	6.721	7.446	5.023	5.521	5.044	3.442
AT4G18990	3.0245	1.24138	0.41044	Down	XYLOGLUCAN ENDOTRANSGLUCOSYLASE/HYDROLASE 29 (XTH29)	xyloglucan endotransglucosylase/hydrolase 29;(source:Araport11)	0.02451	2.408	3.284	3.314	3.092	2.379	0.9449	1.061	0.5806
AT3G25265	101.79	45.9625	0.451542	Down	LOW-MOLECULAR-WEIGHT CYSTEINE-RICH 4 (LCR4)	Encodes a member of a family of small,secreted, cysteine rich protein with sequence similarity to the PCP (pollen coat protein) gene family.	0.02452	50.36	106.8	130.2	119.8	79.22	43.21	41.51	19.91
AT3G60100	4.15225	2.333	0.561864	Down	CITRATE SYNTHASE 5 (CSY5)	citrate synthase 5;(source:Araport11)	0.02452	3.453	5.779	3.582	3.795	2.47	1.916	2.675	2.271
AT2G29940	8.95675	5.879	0.656376	Down	ATP-BINDING CASSETTE G31 (ABCG31)	pleiotropic drug resistance 3;(source:Araport11)	0.02452	8.125	10.84	8.444	8.418	7.133	4.664	6.201	5.518
AT2G43080	71.1825	48.62	0.683033	Down	P4H ISOFORM 1 (AT-P4H-1)	Encodes a prolyl-4 hydroxylase that can hydroxylate poly(L-proline),the collagen model peptide (Pro-Pro-Gly)10 and other proline rich peptides.	0.02452	68.01	69.48	80.8	66.44	51.64	50.18	52.8	39.86
AT1G16630	2.7805	4.43875	1.59639	Up		transmembrane protein;(source:Araport11)	0.02452	3.03	3.229	2.087	2.776	3.972	4.109	3.609	6.065
AT2G20430	2.00675	0.73185	0.364694	Down	ROP-INTERACTIVE CRIB MOTIF-CONTAINING PROTEIN 6 (RIC6)	encodes a member of a novel protein family that contains contain a CRIB (for Cdc42/Rac-interactive binding) motif required for their specific interaction with GTP-bound Rop1 (plant-specific Rho GTPase). Most similar to RIC7 and RIC8 (subfamily group II). Gene is expressed predominantly in inflorescence and flower tissue.	0.02456	2.004	2.427	2.308	1.288	1.403	0.8224	0.3672	0.3348
AT1G55040	3.5605	5.624	1.57955	Up	SLOW EMBRYO DEVELOPMENT1 (SED1)	SED1 is a protein of unknown function that is located in the mitochondrion. sed1 mutants are embryo lethal.	0.02465	3.757	3.651	3.014	3.82	4.757	4.571	4.948	8.22
AT4G13395	0.719458	2.6045	3.62009	Up	ROTUNDIFOLIA LIKE 12 (RTFL12)	ROTUNDIFOLIA like 12;(source:Araport11)	0.02468	0.9369	0.08253	0.4494	1.409	1.486	4.476	1.631	2.825
AT4G01470	21.935	11.357	0.517757	Down	TONOPLAST INTRINSIC PROTEIN 1;3 (TIP1;3)	Encodes AtTIP1;3, functions as water and urea channels in pollen.	0.02468	16.74	25.42	25.83	19.75	18.18	8.526	12.27	6.452
AT1G59540	5.2825	7.683	1.45442	Up	(ZCF125)	Encodes a kinesin-like protein.	0.02468	6.113	5.843	4.108	5.066	6.493	7.08	7.859	9.3
AT1G17220	11.4013	17.4725	1.53251	Up	FU-GAERI1 (FUG1)	Encodes a chloroplast localized protein with similarity to translation initiation factor 2. Can complement loss of INFB in E.coli suggesting FUG1 does function as a translation initiation factor in vivo. Identified as a suppressor of the leaf variegation mutant var2-6. Suppression is only seen in hypomorphs as complete loss of function alleles are embryo lethal. The mRNA is cell-to-cell mobile.	0.0247	13.32	13.16	8.875	10.25	14.33	13.88	16.26	25.42
AT2G16030	2.09875	0.86955	0.414318	Down		S-adenosyl-L-methionine-dependent methyltransferases superfamily protein;(source:Araport11)	0.02471	1.009	1.891	2.73	2.765	1.064	0.627	1.066	0.7212
AT4G16480	29.835	17.475	0.585721	Down	INOSITOL TRANSPORTER 4 (INT4)	Encodes a high affinity H+:myo-inositol symporter. The only other compound shown to be transported was pinitol, a methylated derivative of myo-inositol. The mRNA is cell-to-cell mobile.	0.02473	20.58	35.32	30.85	32.59	26.11	13.41	15.83	14.55
AT5G66230	30.9275	44.9275	1.45267	Up		Chalcone-flavanone isomerase family protein;(source:Araport11)	0.02475	31.77	31.61	24.06	36.27	36.55	41.39	43.06	58.71
AT1G35190	4.08325	2.10425	0.515337	Down		2-oxoglutarate (2OG) and Fe(II)-dependent oxygenase superfamily protein;(source:Araport11)	0.02484	4.515	3.777	4.01	4.031	2.088	2.616	1.079	2.634
AT2G15860	20.2225	11.695	0.578316	Down		BAT2 domain protein;(source:Araport11)	0.02486	21.37	20.74	10.21	28.57	10.32	15.13	10.7	10.63
AT2G20570	17.835	25.155	1.41043	Up	GBF'S PRO-RICH REGION-INTERACTING FACTOR 1 (GPRI1)	Encodes GLK1, Golden2-like 1, one of a pair of partially redundant nuclear transcription factors that regulate chloroplast development in a cell-autonomous manner. GLK2, Golden2-like 2, is encoded by At5g44190. GLK1 and GLK2 regulate the expression of the photosynthetic apparatus. GLK1 is also a member of the GARP transcription factor family.	0.02486	19.99	17.17	18.24	15.94	25.14	25.79	26.27	23.42
AT5G11200	43.16	58.36	1.35218	Up	HOMOLOG OF HUMAN UAP56 B (UAP56B)	One of two genes encoding an ATP-dependent RNA helicase that localizes predominantly to euchromatic regions of Arabidopsis nuclei, and associates with genes transcribed by RNA polymerase II independently from the presence of introns. It is not detected at non-transcribed loci. It interacts with ssRNA, dsRNA and dsDNA, but not with ssDNA. Its ATPase activity is stimulated by RNA and dsDNA and its …	0.02487	48.1	47.64	35.62	41.28	55.54	56.48	59.82	61.6
AT4G18750	0.142713	0.377525	2.64535	Up	DEFECTIVELY ORGANIZED TRIBUTARIES 4 (DOT4)	Encodes a pentatricopeptide (PPR) protein involved in leaf and root development. dot4 mutants have an aberrant midgap venation pattern in juvenile leaves and cotyledons.	0.02498	0.213	0.1296	0.04115	0.1871	0.2624	0.3082	0.3916	0.5479
AT3G10290	7.45675	4.168	0.558957	Down		Nucleotide-sugar transporter family protein;(source:Araport11)	0.02507	7.036	6.593	8.621	7.577	5.468	4.275	4.268	2.661
AT5G18820	4.2755	6.65525	1.5566	Up	(CPNA2)	Encodes a subunit of chloroplasts chaperonins that are involved in mediating the folding of newly synthesized, translocated, or stress-denatured proteins. Cpn60 subunits are: Cpn60alpha1 (At2g28000), AtCpn60alpha2 (At5g18820), AtCpn60beta1 (At1g55490), AtCpn60beta2 (At3g13470), AtCpn60beta3 (At5g56500), AtCpn60beta4 (At1g26230).	0.02507	4.807	4.477	3.639	4.179	5.634	5.868	6.031	9.088
AT1G30410	3.63275	5.55075	1.52797	Up	ATP-BINDING CASSETTE C12 (ABCC12)	member of MRP subfamily	0.02509	4.284	4.494	2.735	3.018	4.704	4.672	5.304	7.523
AT5G55290	137.8	93.315	0.677177	Down	(VHA-E1)	Member of V-ATPase family. Vacuolar-type H + -ATPase (V-ATPase) is a multisubunit proton pump located on the endomembranes.	0.02516	132.7	122	141.8	154.7	86.34	115.8	93.65	77.47
AT4G12860	0.9506	0.29665	0.312066	Down	UNFERTILIZED EMBRYO SAC 14 (UNE14)	EF hand calcium-binding protein family;(source:Araport11)	0.02522	0.6011	1.075	1.219	0.9073	0.3887	0.3652	0.2008	0.2319
AT2G32080	38.88	26.22	0.674383	Down	PURIN-RICH ALPHA 1 (PUR ALPHA-1)	similar to the conserved animal nuclear protein PUR alpha which was implicated in the control of gene transcription and DNA replication	0.02525	42.47	38.8	28.22	46.03	22.88	29.28	23.86	28.86
AT3G52380	42.8775	63.7775	1.48744	Up	CHLOROPLAST RNA-BINDING PROTEIN 33 (CP33)	Encodes a chloroplast RNA-binding protein that stabilizes chloroplast RNAs as evidenced by analyses of transcript accumulation in null mutants. Essential for seedling development (albino, strongly retarded growth even on sucrose-containing medium).	0.02528	48.6	47.46	33.48	41.97	52.93	55.66	54.65	91.87
AT1G08135	0.458	0.122167	0.266741	Down	CATION/H+ EXCHANGER 6B (CHX6B)	cation/H+ exchanger 6B;(source:Araport11)	0.02531	0.5022	0.3981	0.7962	0.1355	0.282	0.07014	0.07714	0.05939
AT5G50040	8.67742	1.07865	0.124305	Down		Plant invertase/pectin methylesterase inhibitor superfamily protein;(source:Araport11)	0.02535	9.38	2.703	22.32	0.3067	2.365	1.651	0.09699	0.2016
AT3G20340	1.338	3.01375	2.25243	Up		Expression of the gene is downregulated in the presence of paraquat, an inducer of photoxidative stress.	0.0255	1.1	1.171	1.275	1.806	2.239	4.066	4.1	1.65
AT4G28085	0.91165	0.190125	0.20855	Down		transmembrane protein;(source:Araport11)	0.02557	0.38	0.4106	1.287	1.569	0.21	0.3552	0.1953	0
AT1G16110	0.380025	0.7969	2.09697	Up	WALL ASSOCIATED KINASE-LIKE 6 (WAKL6)	Encodes a WAK-like receptor-like kinase with a cytoplasmic Ser/Thr protein kinase domain and an extracellular domain with EGF-like repeats. It has been shown to be localized to the cell wall.	0.02557	0.5027	0.321	0.2846	0.4118	0.6216	0.6962	0.7118	1.158
ATMG00020	1128.9	1954	1.73089	Up	RIBOSOMAL RNA26S (RRN26)	mitochondrial 26S ribosomal RNA protein	0.02572	922.6	1309	1200	1084	1971	1339	1437	3069
AT1G14810	32.7525	44.6275	1.36257	Up		encodes an aspartate semialdehyde dehydrogenase, which produces the branch point intermediate for lysine and threonine/methionine biosynthesis	0.02572	32.42	34.34	28.86	35.39	45.28	43.19	44.72	45.32
AT1G16290	3.37975	1.53523	0.454242	Down		transglycosylase;(source:Araport11)	0.02572	2.855	3.389	4.431	2.844	2.451	1.304	1.622	0.7639
AT3G27660	9.477	5.34725	0.564234	Down	OLEOSIN 4 (OLEO4)	Encodes oleosin4 (Plant Cell, 2006, 18:1961), a protein found in oil bodies, involved in seed lipid accumulation. Functions in freezing tolerance of seeds. Note: also referred to as OLE3 in Plant Journal 2008, 55:798.	0.02572	8.334	10.04	9.184	10.35	6.805	5.678	5.496	3.41
AT2G22180	30.9675	12.8047	0.41349	Down		hydroxyproline-rich glycoprotein family protein;(source:Araport11)	0.02595	19.33	27.52	54.51	22.51	25.61	9.144	10.4	6.065
AT4G28090	15.545	9.745	0.62689	Down	SKU5 SIMILAR 10 (sks10)	SKU5 similar 10;(source:Araport11)	0.02597	14.28	16.65	19.33	11.92	10.54	8.014	11.49	8.936
AT4G32510	8.12275	4.44675	0.547444	Down		HCO3- transporter family;(source:Araport11)	0.02597	7.806	7.344	11.11	6.231	6.772	3.204	3.823	3.988
AT4G04570	0.553	1.08005	1.95307	Up	CYSTEINE-RICH RLK (RECEPTOR-LIKE PROTEIN KINASE) 40 (CRK40)	Encodes a cysteine-rich receptor-like protein kinase. The mRNA is cell-to-cell mobile.	0.02599	0.4736	0.5785	0.5728	0.5871	0.8482	1.101	1.029	1.342
AT3G55190	2.288	0.57114	0.249624	Down	(MAGL11)	alpha/beta-Hydrolases superfamily protein;(source:Araport11)	0.02604	1.782	2.129	3.964	1.277	1.425	0.5239	0.2987	0.03696
AT5G39910	2.26675	1.05903	0.4672	Down		Pectin lyase-like superfamily protein;(source:Araport11)	0.02606	3.264	2.124	1.613	2.066	1.009	1.018	1.417	0.7921
AT3G27440	6.6595	3.6855	0.55342	Down	URIDINE KINASE-LIKE 5 (UKL5)	One of the homologous genes predicted to encode proteins with UPRT domains (Uracil phosphoribosyltransferase). Five of these genes (At5g40870, At3g27190, At1g55810, At4g26510 and At3g27440) show a high level of identity, and are annotated as also containing a N-terminal uracil kinase (UK) domain. These genes are referred to as UKL1 (UK-like 1), UKL2, UKL3, UKL4 and UKL5, respectively.	0.02612	5.43	7.828	7.447	5.933	5.282	2.826	3.643	2.991
AT2G07689	0.1603	0.6503	4.05677	Up		NADH-Ubiquinone/plastoquinone (complex I) protein;(source:Araport11)	0.02617	0.2139	0	0.2479	0.1794	0.5225	0.5718	0.5717	0.9352
AT5G18570	11.482	16.515	1.43834	Up	EMBRYO DEFECTIVE 269 (EMB269)	Encodes AtObgC, a plant ortholog of bacterial Obg. AtObgC is a chloroplast-targeting GTPase essential for early embryogenesis. Mutations in this locus result in embryo lethality. The protein is dually localized in the stroma and the inner envelope membrane and is involved in thylakoid membrane biogenesis and functions primarily in plastid ribosome biogenesis during chloroplast development.	0.02617	14.13	11.82	8.798	11.18	13.92	15.91	16.16	20.07
AT4G02930	129.065	177.875	1.37818	Up		GTP binding Elongation factor Tu family protein;(source:Araport11)	0.02621	132.6	143.7	99.26	140.7	162.7	178.7	174.5	195.6
AT1G52400	514.3	776.575	1.50997	Up	BETA GLUCOSIDASE 18 (BGLU18)	encodes a member of glycosyl hydrolase family 1, located in inducible ER bodies which were formed after wounding, required in inducible ER body formation The mRNA is cell-to-cell mobile.	0.02621	686.1	582.8	359	429.3	823.1	663.8	729	890.4
AT3G05725	4.18975	1.03905	0.247998	Down		hypothetical protein (DUF3511);(source:Araport11)	0.02626	6.828	3.285	4.96	1.686	2.386	1.193	0.1562	0.421
AT2G38700	38.825	27.5	0.708307	Down	MEVALONATE DIPHOSPHATE DECARBOXYLASE 1 (MVD1)	Encodes mevalonate diphosphate decarboxylase, the enzyme that catalyzes the synthesis of isopentenyl diphosphate, used in sterol and isoprenoid biosynthesis. The protein appears to form a homodimeric complex. Incidentally, it was shown that the Arabidopsis MVD protein could also interact with its yeast homolog to form a heterodimer.	0.0263	41.45	37.69	34.17	41.99	25.41	29.7	27.8	27.09
AT1G11545	8.01725	4.5525	0.567838	Down	XYLOGLUCAN ENDOTRANSGLUCOSYLASE/HYDROLASE 8 (XTH8)	xyloglucan endotransglucosylase/hydrolase 8;(source:Araport11)	0.02636	7.179	8.638	8.533	7.719	5.912	4.777	4.632	2.889
AT1G02060	6.25025	8.905	1.42474	Up		Tetratricopeptide repeat (TPR)-like superfamily protein;(source:Araport11)	0.02648	6.967	6.894	5.472	5.668	8.457	8.244	8.889	10.03
AT3G45010	57.8575	40.285	0.69628	Down	SERINE CARBOXYPEPTIDASE-LIKE 48 (scpl48)	serine carboxypeptidase-like 48;(source:Araport11)	0.02648	52.61	63.22	60.21	55.39	43.28	37.51	44.64	35.71
AT5G01180	5.70675	3.21	0.562492	Down	NRT1/ PTR FAMILY 8.2 (NPF8.2)	Encodes a dipeptide transporter expressed in pollen and ovules during early seed development. GFP-tagged PTR5 localizes to the plasma membrane.	0.02652	4.279	6.201	7.304	5.043	4.36	2.8	3.182	2.498
AT3G27670	5.518	8.00325	1.45039	Up	RESURRECTION1 (RST1)	A novel protein, did not show high similarity to any protein of known function; reveals a novel genetic connection between lipid synthesis and embryo development. Expressed in all tissues examined including leaves, flowers, roots, stems, and siliques, but accumulation levels were not correlated with the degree to which different organs appeared affected by the mutation. Mutant plants showed alter…	0.02653	5.619	6.732	5.433	4.288	7.582	6.98	8.138	9.313
AT4G25010	10.0063	3.98875	0.398626	Down	(SWEET14)	Encodes a member of the SWEET sucrose efflux transporter family proteins. Together with SWEET13, it is likely involved in modulating the GA response and is required for proper development of anthers, seeds and seedlings.	0.02655	15.63	4.79	13.73	5.875	7.326	3.693	2.081	2.855
AT5G62020	4.46575	7.049	1.57846	Up	HEAT SHOCK TRANSCRIPTION FACTOR B2A (HSFB2A)	member of Heat Stress Transcription Factor (Hsf) family The mRNA is cell-to-cell mobile.	0.02657	4.261	4.555	4.514	4.533	6.109	6.592	6.25	9.245
AT4G02250	158.097	46.0275	0.291134	Down		Plant invertase/pectin methylesterase inhibitor superfamily protein;(source:Araport11)	0.02665	114.6	94.04	331.2	92.55	115	36.51	21.8	10.8
AT1G07340	39.175	27.415	0.699809	Down	SUGAR TRANSPORTER 2 (STP2)	sugar transporter 2;(source:Araport11)	0.02665	45.06	36.01	34.01	41.62	25.66	25.38	30.13	28.49
AT5G18700	23	31.9625	1.38967	Up	(RUK)	Encodes a microtubule-associated kinase-like protein RUNKEL (RUK). Contains a putative serine/threonine kinase domain and a microtubule-binding domain. RUK directly binds to microtubules in vitro and colocalizes with mitotic preprophase band, spindle, and phragmoplast in vivo. Required for cell plate expansion in cytokinesis.	0.02665	25.68	26.94	17.67	21.71	28.86	28.33	33.5	37.16
AT1G23940	4.142	7.6775	1.85357	Up			0.02688	5.129	4.458	2.136	4.845	4.75	6.188	7.912	11.86
AT1G07540	9.69075	5.189	0.535459	Down	TRF-LIKE 2 (TRFL2)	Arabidopsis thaliana telomere-binding protein, putative (At1g07540)	0.02689	4.949	13.41	9.484	10.92	6.808	3.584	5.051	5.313
AT4G39110	29.2875	12.3367	0.421229	Down	BUDDHAS PAPER SEAL 1 (BUPS1)	bups1 and bups1/2 double mutants have reduced feritlity due to premature rupture of pollen tubes before they reach the ovule. BUSP1 interacts with RALF4/19 peptide ligands and ANX1/2 receptors. BUPS/ANX signaling may regulate and promote pollen tube growth.	0.02699	26.65	21.46	54.79	14.25	22.81	11.18	7.655	7.702
AT2G03740	52.8025	35.655	0.675252	Down	LATE EMBRYOGENESIS ABUNDANT 11 (LEA11)	Late embryogenesis abundant protein. Associates with and stabilizes membranes as part of cryoprotective response.	0.02699	54.83	57.24	53.03	46.11	35.74	31.34	44.03	31.51
AT3G17170	26.855	38.6575	1.43949	Up	REGULATOR OF FATTY-ACID COMPOSITION 3 (RFC3)	Translation elongation factor EF1B/ribosomal protein S6 family protein;(source:Araport11)	0.02702	31.74	29.29	18.69	27.7	33.44	38.05	36	47.14
AT1G70820	5.514	8.33225	1.51111	Up		phosphoglucomutase, putative / glucose phosphomutase;(source:Araport11)	0.02703	6.84	5.851	5.028	4.337	8.382	6.394	9.08	9.473
AT2G43650	21.3225	34.8075	1.63243	Up	EMBRYO DEFECTIVE 2777 (EMB2777)	SAS10/C1D family protein. Loss of function mutants are embryo lethal.Ubiquitously expressed, with preference for tissues undergoing rapid cellular growth and differentiation.	0.02703	23	22.64	14.59	25.06	23.71	30.03	28.97	56.52
AT4G36130	64.2675	89.5325	1.39312	Up		Ribosomal protein L2 family;(source:Araport11)	0.02703	73.63	69.02	51.11	63.31	88.4	95.73	101	73
AT5G64580	13.2225	19.1125	1.44545	Up	EMBRYO DEFECTIVE 3144 (EMB3144)	Strong interaction with TIC inner envelope protein translocon which consists of Tic20/Tic56/Tic100/Tic214(Ycf1)(DOI:10.1105/tpc.18.00357).	0.02706	15.18	14.96	10.38	12.37	15.89	17.38	18.08	25.1
AT4G29510	46.49	62.7225	1.34916	Up	ARGININE METHYLTRANSFERASE 11 (PRMT11)	Has arginine N-methyltransferase activity. Modifies AtMBD7.	0.02707	48.93	49.97	43.99	43.07	60	62.38	62.61	65.9
AT1G19640	18.2575	12.1395	0.664905	Down	JASMONIC ACID CARBOXYL METHYLTRANSFERASE (JMT)	Encodes a S-adenosyl-L-methionine:jasmonic acid carboxyl methyltransferase that catalyzes the formation of methyljasmonate from jasmonic acid. Its expression is induced in response to wounding or methyljasmonate treatment.	0.02707	17.94	20.22	16.1	18.77	11.18	14.32	13.93	9.128
AT5G23890	13.5595	21.8925	1.61455	Up		GPI-anchored adhesin-like protein;(source:Araport11)	0.02711	15.54	15.75	9.828	13.12	17.68	16.21	18.28	35.4
AT5G20120	9.315	5.8335	0.626248	Down		testis- and ovary-specific PAZ domain protein;(source:Araport11)	0.02716	10.22	8.501	7.489	11.05	4.874	5.84	5.582	7.038
AT3G23170	38.0925	21.4375	0.562775	Down	PROLINE/SERINE-RICH PROTEIN (PRP)	PRP is a proline/serine rich protein of unknown function. It interacts with defense related MAP kinase MPK6 and others. It's expression is induced by PAMP elicitors. May play a role in response to pathogens.	0.02717	35.53	28.34	54.78	33.72	27.47	25.29	19.9	13.09
AT3G63130	22.8175	31.5225	1.38151	Up	RAN GTPASE ACTIVATING PROTEIN 1 (RANGAP1)	Encodes a RAN GTPase activating protein involved in nuclear import, cell plate formation and mitotic spindle formation. Associates with nuclear envelope membranes.	0.02722	23.63	25.94	19.49	22.21	29.16	28.93	30.77	37.23
AT5G19260	11.1175	7.10125	0.638745	Down	FANTASTIC FOUR 3 (FAF3)	A member of the FAF family proteins encoded by the FANTASTIC FOUR (FAF) genes: AT4G02810 (FAF1), AT1G03170 (FAF2), AT5G19260 (FAF3) and AT3G06020 (FAF4). FAFs have the potential to regulate shoot meristem size in Arabidopsis thaliana. FAFs can repress WUS, which ultimately leads to an arrest of meristem activity in FAF overexpressing lines.	0.02725	10.81	10.32	11.04	12.3	7.534	7.217	5.814	7.84
AT1G69450	10.6775	6.93525	0.64952	Down		Early-responsive to dehydration stress protein (ERD4);(source:Araport11)	0.02727	10.21	10.4	11.96	10.14	8.446	7.269	6.808	5.218
AT3G01160	9.6035	15.7975	1.64497	Up		pre-rRNA-processing ESF1-like protein;(source:Araport11)	0.02727	10.14	10.09	6.544	11.64	11.94	13.59	12.13	25.53
AT1G80560	10.8857	16.22	1.49002	Up	ISOPROPYLMALATE DEHYDROGENASE 2 (IMD2)	The AtIMD2 is one out of 3 genes encoding the enzyme 3-isopropylmalate dehydrogenase involved in leucine biosynthesis in Arabidopsis. Its subcellular location has been targeted to plastids. The mRNA is cell-to-cell mobile.	0.02729	13.96	11.54	6.473	11.57	14.88	15.87	16.75	17.38
AT3G50580	26.455	16.1725	0.611321	Down		transmembrane protein;(source:Araport11)	0.02732	20.58	22.3	38.4	24.54	15.61	15.58	17.77	15.73
AT3G24620	1.2617	0.385575	0.3056	Down	ROP (RHO OF PLANTS) GUANINE NUCLEOTIDE EXCHANGE FACTOR 8 (ROPGEF8)	Encodes a member of KPP-like gene family, homolog of KPP (kinase partner protein) gene in tomato. Also a member of the RopGEF (guanine nucleotide exchange factor) family, containing the novel PRONE domain (plant-specific Rop nucleotide exchanger), which is exclusively active towards members of the Rop subfamily.	0.02733	1.45	1.571	1.171	0.8548	0.9092	0.3631	0.2022	0.0678
AT1G66180	68.06	96.7125	1.42099	Up		The gene encodes a putative aspartyl protease (ASP). Its expression is induced in response to light and ascorbate. The mRNA is cell-to-cell mobile.	0.02736	61.78	69.35	77.31	63.8	97.03	84.36	94.06	111.4
AT1G25300	1.3928	0.55105	0.395642	Down		Octicosapeptide/Phox/Bem1p family protein;(source:Araport11)	0.0274	1.583	1.441	0.9372	1.61	0.6536	0.4094	0.8379	0.3033
AT5G41090	8.23725	4.3635	0.529728	Down	NAC DOMAIN CONTAINING PROTEIN 95 (NAC095)	NAC domain containing protein 95;(source:Araport11)	0.02754	10.04	8.768	8.058	6.083	2.792	5.929	4.568	4.165
AT3G52980	2.339	0.932925	0.398856	Down		Zinc finger (CCCH-type) family protein / RNA recognition motif (RRM)-containing protein;(source:Araport11)	0.02755	1.691	3.034	2.378	2.253	1.258	0.7581	1.407	0.3086
AT5G38005	1.53	0.5226	0.341569	Down		other_RNA;(source:Araport11)	0.02755	1.696	1.325	1.995	1.104	0.582	0.123	0.8645	0.5209
AT1G78980	1.01673	0.297425	0.292532	Down	STRUBBELIG-RECEPTOR FAMILY 5 (SRF5)	STRUBBELIG-receptor family 5;(source:Araport11)	0.02755	1.058	0.9765	1.605	0.4274	0.621	0.3636	0.1481	0.057
AT3G24230	2.86425	1.4463	0.504949	Down		Pectate lyase family protein;(source:Araport11)	0.02755	3.095	2.512	2.755	3.095	1.648	2.062	1.26	0.8152
AT3G51090	15.4525	9.81425	0.635124	Down		coiled-coil 90B-like protein (DUF1640);(source:Araport11)	0.02757	14.7	15.42	16.92	14.77	10.48	12.58	9.185	7.012
AT2G46520	13.2375	18.585	1.40397	Up	(XPO2)	cellular apoptosis susceptibility protein, putative / importin-alpha re-exporter;(source:Araport11)	0.02761	13.1	14.1	11.75	14	17.26	15.44	18.87	22.77
AT3G16770	25.535	16.08	0.629724	Down	ETHYLENE-RESPONSIVE ELEMENT BINDING PROTEIN (EBP)	Encodes a member of the ERF (ethylene response factor) subfamily B-2 of the plant specific ERF/AP2 transcription factor family (RAP2.3). The protein contains one AP2 domain. There are 5 members in this subfamily including RAP2.2 AND RAP2.12.It is localized to the nucleus and acts as a transcriptional activator through the GCC-box. It has been identified as a suppressor of Bax-induced cell death b…	0.02767	27.04	22.43	33.97	18.7	15.15	16.97	17.88	14.32
AT2G47170	90.1775	62.5625	0.693771	Down	(ARF1A1C)	Gene encoding ADP-ribosylation factor and similar to other ARFs and ARF-like proteins. Members of this family are known to be essential for vesicle coating and uncoating and functions in GTP-binding. The gene is shown to play a role in cell division, cell expansion and cellulose production using antisense construct. The mRNA is cell-to-cell mobile.	0.02769	92.91	88.86	72.34	106.6	57.34	75.28	59.97	57.66
AT1G02280	43.715	61.6625	1.41056	Up	TRANSLOCON AT THE OUTER ENVELOPE MEMBRANE OF CHLOROPLASTS 33 (TOC33)	Encodes a GTP-binding GTP-ase. Component of the chloroplast protein import machinery. Required for import of POR B into plastids. Toc33 phosphorylation may not play an important role in vivo.	0.02772	51.99	43.94	30.26	48.67	52.34	64.25	62.03	68.03
AT5G51810	8.54075	5.08475	0.595352	Down	GIBBERELLIN 20 OXIDASE 2 (GA20OX2)	Encodes gibberellin 20-oxidase. Involved in gibberellin biosynthesis. Up-regulated by far red light in elongating petioles. Not regulated by a circadian clock. Mutation of GA20ox2 delays flowering.	0.02781	7.873	8.835	8.349	9.106	6.372	5.221	5.502	3.244
AT1G30920	0.3902	0.102027	0.261475	Down		F-box family protein;(source:Araport11)	0.02781	0.3679	0.323	0.4264	0.4435	0.09913	0.02794	0.2219	0.05914
AT1G69410	46.195	29.42	0.636865	Down	EUKARYOTIC ELONGATION FACTOR 5A-3 (ELF5A-3)	Encodes eIF5A-2, a putative eukaryotic translation initiation factor. There are three eIF5A coding genes in Arabidopsis: eIF5A-1/At1g13950, eIF5A-2/At1g26630 and eIF5A-3/At1g69410.	0.02788	46.07	45.26	44.83	48.62	30.54	37.33	31.42	18.39
AT2G38710	62.4375	41.915	0.671311	Down		AMMECR1 family;(source:Araport11)	0.0279	59.43	68.19	47.36	74.77	45.33	48.1	39.29	34.94
AT2G39890	21.645	13.88	0.641257	Down	PROLINE TRANSPORTER 1 (PROT1)	Encodes a proline transporter with affinity for gly betaine, proline and GABA. Protein is expressed in the vascular tissue, specifically the phloem.	0.02792	18.78	20.92	27.22	19.66	16.85	14	13.46	11.21
AT4G27580	61.4235	10.474	0.170521	Down		phosphatidylinositol transfer SFH5-like protein;(source:Araport11)	0.02792	98.04	37.87	106.3	3.484	21.97	16.48	1.345	2.101
AT3G04740	9.86775	14.5575	1.47526	Up	STRUWWELPETER (SWP)	encodes a protein with similarities to subunits of the Mediator complex, required for RNA polymerase II recruitment at target promoters in response to specific activators. Lines carrying loss of function mutations in the gene have reduced cell numbers in aerial organs. On the other hand, lines overexpressing the gene have increased number of small cells in clusters, suggesting cell division is mo…	0.02794	10.36	11.41	8.614	9.087	13.5	11.11	13.13	20.49
AT1G15420	38.2875	54.06	1.41195	Up	LANT-SPECIFIC COMPONENT OF THE PRE- RRNA PROCESSING COMPLEX1 (PCP1)	Encodes a novel plant specific protein that is co-expressed with components of pre-rRNA processing complex. Co-localizes with NuGWD1 and SWA1.	0.02813	39.17	36.51	40.47	37	53.33	56.7	60.66	45.55
AT5G13000	35.5425	53.0325	1.49209	Up	GLUCAN SYNTHASE-LIKE 12 (GSL12)	encodes a gene similar to callose synthase	0.02825	40.96	43.45	26.4	31.36	46.11	43.36	49.38	73.28
ATCG01080	4.7635	10.6385	2.23334	Up	(NDHG)	NADH dehydrogenase ND6	0.0284	4.884	5.475	5.993	2.702	8.923	5.809	8.642	19.18
AT1G05490	3.36425	5.38525	1.60073	Up	CHROMATIN REMODELING 31 (chr31)	Involved in gene silencing. Locus-specific regulator of 24nt-siRNA expression, works together with CLSY1-4 as the master regulators of essentially all Pol-IV-dependent 24nt-siRNAs.	0.02848	3.362	3.47	3.094	3.531	4.693	3.55	4.936	8.362
ATCG00640	2.60925	9.02025	3.45703	Up	RIBOSOMAL PROTEIN L33 (RPL33)	encodes a chloroplast ribosomal protein L33, a constituent of the large subunit of the ribosomal complex	0.0285	2.539	4.997	1.75	1.151	4.34	4.504	4.637	22.6
AT3G17980	3.0921	0.704	0.227677	Down	C2 DOMAIN (C2)	Calcium-dependent lipid-binding (CaLB domain) family protein;(source:Araport11)	0.0285	4.126	2.075	5.843	0.3244	1.482	0.8147	0.2872	0.2321
AT2G15630	0.63755	1.24025	1.94534	Up		Pentatricopeptide repeat (PPR) superfamily protein;(source:Araport11)	0.0285	0.7778	0.731	0.5614	0.48	1.055	1.231	1.09	1.585
AT4G21720	14.015	8.8945	0.634641	Down		defensin-like protein;(source:Araport11)	0.0285	16.88	12.88	11.89	14.41	9.621	9.929	8.606	7.422
AT2G07687	1.2575	2.55125	2.02883	Up		Cytochrome c oxidase, subunit III;(source:Araport11)	0.02858	1.037	1.218	1.314	1.461	2.483	1.68	2.309	3.733
AT1G59910	7.13675	10.7743	1.50969	Up	FORMIN HOMOLOGUE 7 (FORMIN7)	Member of family of cytoskeletal-interacting proteins which have the ability to stimulate actin nucleation and barbed-end capping through the combined activity of conserved formin-homology 1 (FH1) and formin-homology 2 (FH2) domains.	0.02862	8.176	7.153	6.354	6.864	9.524	7.953	10.12	15.5
AT5G01075	422.175	282.65	0.669509	Down	TWISTED SEED1 (TWS1)	Encodes a small ER-localized protein that is strongly expressed in seeds and regulates both embryo development and accumulation of storage compounds. At the cellular level, TWS1 is responsible for cuticle deposition on epidermal cells and organization of the endomembrane system.	0.02862	370.8	352.8	445.7	519.4	293.1	324.6	276.8	236.1
AT1G09250	11.4895	5.9695	0.519561	Down	ATBS1 INTERACTING FACTOR 4 (AIF4)	basic helix-loop-helix (bHLH) DNA-binding superfamily protein;(source:Araport11)	0.02862	12.28	11.4	8.778	13.5	7.343	8.588	5.268	2.679
AT1G44446	35.0725	48.3875	1.37964	Up	CHLORINA 1 (CH1)	Encodes chlorophyllide aoxygenase which converts chlorophyllide a to chlorophyllide bby catalyzing two successive hydroxylations at the 7-methyl group of chlorophyllide a . Mutants are deficient in pigments that associate with thylakoid membrane proteins, lacking chlorophyll b and light-harvesting proteins of photosystem II. The protein was shown through cross-linking experiments to interact with…	0.02862	40.85	35.79	34.13	29.52	44.88	50.79	52.12	45.76
AT5G63790	4.038	6.97525	1.7274	Up	NAC DOMAIN CONTAINING PROTEIN 102 (NAC102)	Encodes a member of the NAC family of transcription factors. ANAC102 appears to have a role in mediating response to low oxygen stress (hypoxia) in germinating seedlings. Its expression can be induced by beta-cyclocitral, an oxidized by-product of beta-carotene generated in the chloroplasts, mediates a protective retrograde response that lowers the levels of toxic peroxides and carbonyls, limitin…	0.02862	3.616	4.432	2.653	5.451	4.851	8.179	6.161	8.71
AT5G53635	2.97725	1.5285	0.513393	Down		F-box/RNI-like/FBD-like domains-containing protein;(source:Araport11)	0.02867	2.985	2.863	3.91	2.151	1.363	1.362	1.92	1.469
AT2G03960	0.340975	0.11087	0.325156	Down		pseudogene of hypothetical protein (DUF239);(source:Araport11)	0.02867	0.3791	0.3384	0.4395	0.2069	0.1641	0.1998	0.06783	0.01175
AT5G15700	7.108	10.9015	1.53369	Up		Nucleus encoded plastid RNA polymerase. Localized in mitochondria and chloroplast.	0.02877	8.214	7.869	4.672	7.677	8.865	9.914	9.257	15.57
AT1G22720	0.6639	0.200875	0.302568	Down		Protein kinase superfamily protein;(source:Araport11)	0.02877	0.4599	0.8543	0.9207	0.4207	0.2403	0.254	0.2017	0.1075
AT2G20850	8.98075	12.405	1.38129	Up	STRUBBELIG-RECEPTOR FAMILY 1 (SRF1)	STRUBBELIG-receptor family 1;(source:Araport11)	0.02879	10.31	8.735	8.321	8.557	11.51	12.51	12.41	13.19
AT3G12620	21.6975	14.9725	0.690056	Down	D-CLADE TYPE 2C PROTEIN PHOSPHATASE 3 (PP2C.D3)	Protein phosphatase 2C family protein;(source:Araport11)	0.02887	21.24	21.42	22.95	21.18	16.95	15.12	14.45	13.37
AT3G17675	6.69375	3.5545	0.531018	Down		Encodes a Plantacyanin/Basic blue family protein	0.02901	7.11	6.46	6.56	6.645	3.66	3.267	3.834	3.457
AT3G50570	135.498	77.7575	0.573867	Down		hydroxyproline-rich glycoprotein family protein;(source:Araport11)	0.02904	105.3	91.89	225.3	119.5	72.73	73.46	91.96	72.88
AT2G38240	1.3983	0.180605	0.12916	Down	JASMONATE-INDUCED OXYGENASE4 (JOX4)	One of 4 paralogs encoding a 2-oxoglutarate/Fe(II)-dependent oxygenases that hydroxylates JA to 12-OH-JA.	0.02905	2.934	0.3682	2.291	0	0.2515	0.3003	0.03822	0.1324
AT1G20135	4.10475	1.1526	0.280797	Down		GDSL-motif esterase/acyltransferase/lipase. Enzyme group with broad substrate specificity that may catalyze acyltransfer or hydrolase reactions with lipid and non-lipid substrates.	0.02909	2.18	2.981	6.335	4.923	3.033	0.7134	0.6123	0.2517
AT4G13560	127.547	69.9125	0.548129	Down	UNFERTILIZED EMBRYO SAC 15 (UNE15)	Late embryogenesis abundant protein (LEA) family protein;(source:Araport11)	0.0292	97.69	149.7	144.3	118.5	107	69.89	68.68	34.08
AT5G40070	0.940125	0.296225	0.315091	Down		MADS-box family protein;(source:Araport11)	0.0292	1.106	1.45	0.4723	0.7322	0.2091	0.3537	0.1729	0.4492
AT5G18080	5.91625	2.468	0.417156	Down	SMALL AUXIN UP RNA 24 (SAUR24)	Encodes SAUR24 (small auxin up RNA 24). Note that TAIR nomenclature is based on Plant Mol Biol. 2002, 49:373-85 (PMID:12036261). In Planta (2011) 233:1223?1235 (PMID:21327815), SAUR24 is At5g18010.	0.0292	4.952	5.809	6.209	6.695	3.921	1.965	1.126	2.86
AT5G13210	1.6795	2.78275	1.65689	Up		Uncharacterized conserved protein UCP015417, vWA;(source:Araport11)	0.02925	1.582	1.883	1.746	1.507	2.565	2.415	2.814	3.337
AT1G02630	2.27775	1.04222	0.457568	Down		Nucleoside transporter family protein;(source:Araport11)	0.02925	1.833	2.365	1.61	3.303	1.004	1.61	1.018	0.5369
AT1G65730	43.205	26.145	0.605138	Down	YELLOW STRIPE LIKE 7 (YSL7)	Arabidopsis thaliana metal-nicotianamine transporter YSL4	0.02933	29.94	43.94	55.95	42.99	34.82	20.23	28.13	21.4
AT3G49240	5.8075	9.17	1.57899	Up	NUWA (NUWA)	Encodes NUWA, an imprinted gene that controls mitochondrial function in early seed development. It is expressed in both the mitochondrion and chloroplast and is also involved in RNA editing in the mitochondrion and chloroplast as a core member of E+-type PPR editosomes.	0.02933	6.175	5.901	4.933	6.221	7.668	7.307	7.595	14.11
AT1G03550	23.1525	15.9125	0.687291	Down	SECRETORY CARRIER MEMBRANE PROTEIN 4 (SCAMP4)	Secretory carrier membrane protein (SCAMP) family protein;(source:Araport11)	0.02933	23.58	22.91	21.42	24.7	14.68	15.19	13.53	20.25
AT4G13780	30.7175	42.0825	1.36998	Up		methionine-tRNA ligase, putative / methionyl-tRNA synthetase, putative / MetRS;(source:Araport11)	0.02933	31.42	32.85	27.47	31.13	37.75	37.8	40.93	51.85
AT4G20360	138.065	204	1.47756	Up	RAB GTPASE HOMOLOG E1B (ATRABE1B)	Nuclear transcribed, plastid localized EF-Tu translation elongation factor. Referred to as AtRabE1b in DOI:10.1104/pp.013052. However, wider community usage and more publications assign the symbol RabE1b to At5g59840.	0.02933	161.3	146.3	91.26	153.4	185.8	164.7	196.4	269.1
AT1G07476	4.8435	2.04375	0.421957	Down		transmembrane protein;(source:Araport11)	0.0294	2.29	5.802	5.459	5.823	3.397	1.706	1.837	1.235
AT4G37260	5.1565	8.994	1.74421	Up	MYB DOMAIN PROTEIN 73 (MYB73)	Member of the R2R3 factor gene family. The mRNA is cell-to-cell mobile.	0.02942	7.119	4.627	3.882	4.998	6.961	6.143	9.062	13.81
AT1G26480	49.425	26.135	0.528781	Down	GENERAL REGULATORY FACTOR 12 (GRF12)	14-3-3 protein GF14iota (grf12)	0.02945	33.62	60.44	62.25	41.39	41.34	23.47	25.72	14.01
AT5G18910	7.706	2.3625	0.306579	Down		Protein kinase superfamily protein;(source:Araport11)	0.02948	8.702	5.583	13.58	2.959	5.556	2.027	1.31	0.557
AT2G41560	7.9955	12.018	1.5031	Up	AUTOINHIBITED CA(2+)-ATPASE, ISOFORM 4 (ACA4)	Encodes a calmodulin-regulated Ca(2+)-ATPase that improves salt tolerance in yeast. Localized to the vacuole. Lesion mimic phenotype when mutation in the gene is combined with a mutation in ACA11. Lesion mimic phenotype of double knockout can be suppressed by nutritional supplements that increase anion levels (e.g. 15 mM Nitrate, Chloride, or Phosphate).	0.02964	9.998	7.729	6.901	7.354	9.942	10.05	11.09	16.99
AT3G16500	17.0875	24.0475	1.40732	Up	PHYTOCHROME-ASSOCIATED PROTEIN 1 (PAP1)	phytochrome-associated protein 1 (PAP1)	0.02965	19.28	19.46	11.63	17.98	22.43	23.42	24.82	25.52
AT1G11110	0.85595	0.325223	0.379955	Down		LisH and RanBPM domains containing protein;(source:Araport11)	0.02965	1.199	0.8403	0.5658	0.8187	0.4575	0.4385	0.323	0.08189
AT5G39840	4.81875	7.14625	1.48301	Up		ATP-dependent RNA helicase;(source:Araport11)	0.02965	5.418	5.392	3.877	4.588	6.288	6.432	6.682	9.183
ATMG00516	14.1175	25.595	1.813	Up			0.02968	14.19	16.79	11.52	13.97	22.94	15.6	22.22	41.62
AT4G31350	26.5	18.12	0.683774	Down		Core-2/I-branching beta-1,6-N-acetylglucosaminyltransferase family protein;(source:Araport11)	0.02968	25.72	28.8	20.81	30.67	18.11	19.47	19.61	15.29
AT5G66520	0.939	2.143	2.28222	Up	CHLOROPLAST RNA EDITING FACTOR 7 (CREF7)	Encodes a pentatricopeptide repeat protein involved in chloroplast mRNA editing. Mutants display defects in C-U editing of ndhB.	0.02974	1.09	1.156	0.49	1.02	1.503	1.136	1.812	4.121
AT1G71770	50.13	33.015	0.658588	Down	POLY(A)-BINDING PROTEIN 5 (PAB5)	Encodes a Class I polyA-binding protein. Expressed in floral organs. Binds polyA sepharose in vitro.	0.0298	44.39	56.98	56.76	42.39	39.13	24.81	36.53	31.59
AT5G59790	7.2165	10.796	1.49602	Up	SOSEKI5 (SOK5)	SOK5 is a DUF966 domain containing protein expressed in early embryos.	0.0298	8.034	7.566	6.028	7.238	9.234	8.75	10.11	15.09
AT5G60740	1.15902	0.52145	0.449904	Down	ATP-BINDING CASSETTE G28 (ABCG28)	ABC transporter family protein. Localizes to the growing tip of pollen tubes where it appears to be critical for localizing polyamines and reactive oxygen species.	0.02983	1.008	1.25	1.623	0.7551	0.8429	0.4216	0.322	0.4993
AT5G19940	51.3925	69.1125	1.3448	Up	FIBRILLIN6 (FBN6)	Enables plants to cope with moderate light stress and affects cadmium tolerance.	0.02987	56.4	54.6	44.31	50.26	63.9	68.12	74.49	69.94
AT1G18800	70.6075	95.5975	1.35393	Up	NAP1-RELATED PROTEIN 2 (NRP2)	Double nrp1-1 nrp2-1 mutants show arrest of cell cycle progression at G2/M and disordered cellular organization occurred in root tips. Localize in the nucleus and can form homomeric and heteromeric protein complexes with NRP1. Bind histones Histone2A and Histone2B and associate with chromatin in vivo. Plant mutated in both NRP1 and NRP2 genes show hypersensitivity to genotoxic stresses including …	0.0299	76.52	76.66	55.14	74.11	86.43	105	88.76	102.2
AT1G22370	0.604025	1.2329	2.04114	Up	UDP-GLUCOSYL TRANSFERASE 85A5 (UGT85A5)	UDP-glucosyl transferase 85A5;(source:Araport11)	0.02999	0.5868	0.6443	0.6325	0.5525	1.317	0.9759	0.9707	1.668
AT5G10430	75.1575	31.9625	0.425274	Down	ARABINOGALACTAN PROTEIN 4 (AGP4)	Encodes arabinogalactan-protein (AGP4) that is expressed in female reproductive tissues. It is involved in promoting degeneration of the persistent synergid after fertilization. In mutant ovules, the persistent synergid does not degrade resulting in polytuby.	0.03005	39.45	39.72	174.5	46.96	38.51	33.19	30.15	26
AT1G07840	15.8625	22.21	1.40016	Up		Sas10/Utp3/C1D family;(source:Araport11)	0.03008	16.32	16.57	13.25	17.31	19.97	21.47	20.26	27.14
AT5G01700	2.149	1.11005	0.516543	Down		Protein phosphatase 2C family protein;(source:Araport11)	0.03026	2.598	2.264	2.113	1.621	1.389	1.003	0.8822	1.166
ATCG00470	29.2175	47.18	1.61479	Up	ATP SYNTHASE EPSILON CHAIN (ATPE)	ATPase epsilon subunit	0.03026	26.07	39.96	25.21	25.63	39.75	37.06	41.3	70.61
AT2G39855	2.76725	1.315	0.475201	Down		plant/protein;(source:Araport11)	0.03035	2.814	2.064	3.964	2.227	1.597	1.087	1.425	1.151
AT4G09030	131.248	77	0.586678	Down	ARABINOGALACTAN PROTEIN 10 (AGP10)	Encodes arabinogalactan protein (AGP10). The mRNA is cell-to-cell mobile.	0.03035	98.79	100	211.4	114.8	82.8	84	78.19	63.01
AT5G51870	0.89255	0.199675	0.223713	Down	AGAMOUS-LIKE 71 (AGL71)	Encodes a MADS-box transcription factor involved in floral transition.	0.03037	0.5261	0.1991	0.655	2.19	0.056	0.1894	0.2025	0.3508
AT1G70790	20.9025	13.7575	0.658175	Down	C2-DOMAIN ABA-RELATED 9 (CAR9)	C2-domain ABA-related (CAR) protein, involved in the recruitment of ABA receptors to the plasma membrane to facilitate ABA signaling. Its stability and dynamic localization is regulated by LOT1.	0.03037	25.11	20.97	17.6	19.93	15.55	15.86	10.92	12.7
AT5G49910	28.9075	40.33	1.39514	Up	CHLOROPLAST HEAT SHOCK PROTEIN 70-2 (cpHsc70-2)	Stromal heat shock protein involved in protein import into chloroplast. The mRNA is cell-to-cell mobile.	0.03039	30.36	31.47	23.91	29.89	35.2	38.66	35.47	51.99
AT2G31220	11.089	7.27475	0.656033	Down	BASIC HELIX LOOP HELIX PROTEIN 10 (BHLH010)	Encodes a bHLH transcription factor that together with bHLH089 and bHLH091 is important for the normal transcriptome of the developing Arabidopsis anther, possibly by forming a feed-forward loop with DYT1.	0.03039	13.01	10.75	8.456	12.14	6.507	7.475	8.73	6.387
AT4G00350	12.228	5.8785	0.480741	Down		MATE efflux family protein;(source:Araport11)	0.03039	11.65	12.94	17.76	6.562	9.555	4.69	6.302	2.967
AT1G07985	0.2468	0.691475	2.80176	Up		Expressed protein;(source:Araport11)	0.03059	0.1837	0.1642	0.362	0.2773	0.4752	0.8036	0.8729	0.6142
AT1G06515	68.015	44.575	0.65537	Down	SMALL SUBUNIT OF SPT A (SSSPTA)	Encodes a 56-amino acid polypeptide with low but significant similarity to human small subunit of serine palmitoyltransferase that localizes to the ER and physically interacts with and greatly stimulates the activity of LCB1/LCB2 heterodimer ser palmitoyltransferase complex. Mutants have low pollen viability.	0.03059	62.08	67.33	64.81	77.84	45.09	56.73	45.22	31.26
AT1G20132	8.91075	5.1695	0.580142	Down		GDSL-motif esterase/acyltransferase/lipase. Enzyme group with broad substrate specificity that may catalyze acyltransfer or hydrolase reactions with lipid and non-lipid substrates.	0.03068	9.567	8.746	9.953	7.377	4.813	6.074	6.68	3.111
AT3G50350	14.181	7.18475	0.506646	Down		membrane insertase, putative (DUF1685);(source:Araport11)	0.03072	13.03	11.19	23.53	8.974	9.323	6.706	7.627	5.083
AT1G74875	1.26553	0.379345	0.299753	Down		F-box protein;(source:Araport11)	0.03074	1.96	1.011	1.617	0.4741	0.6229	0.4122	0.4338	0.04848
AT2G29200	10.0122	15.17	1.51514	Up	PUMILIO 1 (PUM1)	Encodes a member of the Arabidopsis Pumilio (APUM) proteins containing PUF domain (eight repeats of approximately 36 amino acids each). PUF proteins regulate both mRNA stability and translation through sequence-specific binding to the 3' UTR of target mRNA transcripts.	0.03077	10.71	10.82	6.869	11.65	12.23	13.24	13.37	21.84
AT1G14610	23.76	34.8875	1.46833	Up	TWIN 2 (TWN2)	Required for proper proliferation of basal cells.	0.03079	25.57	26.56	20.88	22.03	27.02	30.23	31.81	50.49
AT3G17220	16.0455	6.522	0.406469	Down	PECTIN METHYLESTERASE INHIBITOR 2 (PMEI2)	Pectin methylesterase inhibitor AtPMEI2. Inactivates AtPPME1 in vitro. Localized to Brefeldin A-induced compartments, and was found in FYVE-induced endosomal aggregates.	0.03081	8.272	17.08	25.09	13.74	10.79	5.717	7.338	2.243
AT3G04700	14.625	5.62675	0.384735	Down		carboxylate clamp-TPR protein (DUF1685);(source:Araport11)	0.03081	18.22	11.18	25.51	3.59	8.597	5.922	2.881	5.107
AT1G02470	11.8605	6.9765	0.588213	Down		Polyketide cyclase/dehydrase and lipid transport superfamily protein;(source:Araport11)	0.03093	11.57	14.34	13.03	8.502	6.939	8.499	4.835	7.633
AT5G03960	3.0865	1.6545	0.536044	Down	IQ-DOMAIN 12 (IQD12)	Member of IQ67 (CaM binding) domain containing family.	0.03104	2.333	3.744	2.645	3.624	1.924	1.43	1.672	1.592
AT3G49142	0.470025	0.96315	2.04915	Up		Tetratricopeptide repeat (TPR)-like superfamily protein;(source:Araport11)	0.03112	0.5157	0.5046	0.3881	0.4717	0.6352	0.8464	0.89	1.481
AT3G51720	14.1475	20.0425	1.41668	Up		WEB family protein (DUF827);(source:Araport11)	0.03112	13.79	15.52	14.81	12.47	17.76	18.71	21.65	22.05
ATCG00760	6.9525	24.7375	3.55807	Up	RIBOSOMAL PROTEIN L36 (RPL36)	encodes a chloroplast ribosomal protein L36, a constituent of the large subunit of the ribosomal complex	0.03112	7.745	3.4	12.2	4.465	11.65	11.76	12.04	63.5
AT3G25220	358.8	241.25	0.67238	Down	FK506-BINDING PROTEIN 15 KD-1 (FKBP15-1)	immunophilin (FKBP15-1)	0.03117	352.9	394.2	314.9	373.2	290.3	247.6	253.8	173.3
AT3G23727	8.2315	3.28225	0.398743	Down	SCR-LIKE 12 (SCRL12)	Encodes a member of a family of small, secreted, cysteine rich proteins with sequence similarity to SCR (S locus cysteine-rich protein).	0.03117	3.659	10.74	9.571	8.956	5.187	3.004	3.157	1.781
AT2G18020	771.8	1106.53	1.43369	Up	EMBRYO DEFECTIVE 2296 (EMB2296)	Ribosomal protein L2 family;(source:Araport11)	0.03117	778.5	768.9	793.5	746.3	1196	1164	1176	890.1
AT5G41310	0.193065	0.06327	0.327713	Down		P-loop nucleoside triphosphate hydrolases superfamily protein with CH (Calponin Homology) domain-containing protein;(source:Araport11)	0.03117	0.2148	0.2561	0.2213	0.08006	0.07546	0.09281	0.06025	0.02456
AT1G66540	1.924	0.97465	0.506575	Down		Cytochrome P450 superfamily protein;(source:Araport11)	0.03117	1.454	1.762	2.639	1.841	1.194	0.9013	1.002	0.8013
AT2G41760	23.3975	16.085	0.687467	Down	GLN-SPECIFIC AMINO-TERMINAL (NT)-AMIDASE (NTAQ1)	Controls the expression of specific defence-response genes, activates the synthesis pathway for the phytoalexin camalexin and influences basal resistance to Pseudomonas syringae pv tomato (Pst).	0.03118	24.09	23.81	20.02	25.67	16.11	17.87	16.39	13.97
AT5G50070	0.734575	0.168108	0.22885	Down		Plant invertase/pectin methylesterase inhibitor superfamily protein;(source:Araport11)	0.03119	0.7747	1.117	0.7532	0.2934	0.07183	0.3037	0.2969	0
AT4G34910	11.0567	16.96	1.5339	Up		P-loop containing nucleoside triphosphate hydrolases superfamily protein;(source:Araport11)	0.0312	11.85	12.54	8.767	11.07	13.84	15.36	13.05	25.59
AT4G16745	39.33	18.5525	0.471714	Down		Exostosin family protein;(source:Araport11)	0.03124	25.85	34.51	62.84	34.12	34.77	14.09	15.28	10.07
AT1G30350	49.2825	27.0625	0.54913	Down		Pectin lyase-like superfamily protein;(source:Araport11)	0.03132	33.38	60.32	63.74	39.69	39.1	20.42	31.4	17.33
AT2G38230	4.44125	6.9435	1.56341	Up	PYRIDOXINE BIOSYNTHESIS 1.1 (PDX1.1)	Encodes a protein predicted to function in tandem with PDX2 to form glutamine amidotransferase complex with involved in vitamin B6 biosynthesis. The mRNA is cell-to-cell mobile.	0.03144	4.966	4.497	4.005	4.297	6.722	6.61	6.838	7.604
AT2G36020	51.4325	17.5675	0.341564	Down	HVA22-LIKE PROTEIN J (HVA22J)	HVA22-like protein J;(source:Araport11)	0.03144	33.42	38.39	95.2	38.72	42.44	12.42	10.41	5
AT5G60390	2895	4174.75	1.44206	Up	(EF1ALPHA)	GTP binding Elongation factor Tu family protein;(source:Araport11)	0.03147	2909	2953	2748	2970	4356	3981	4380	3982
AT3G57960	4.51075	2.344	0.519648	Down		Emsy N Terminus (ENT) domain-containing protein;(source:Araport11)	0.03147	4.763	4.746	5.401	3.133	1.741	2.595	2.347	2.693
AT2G34680	8.63725	12.87	1.49006	Up	AUXIN-INDUCED IN ROOT CULTURES 9 (AIR9)	isolated from differential screening of a cDNA library from auxin-treated root culture. sequence does not show homology to any known proteins and is predicted to be extracellular.	0.03147	9.361	10.3	6.923	7.965	10.92	10.03	11.84	18.69
AT5G48100	0.326175	0.08977	0.27522	Down	TRANSPARENT TESTA 10 (TT10)	Encodes a protein that is similar to laccase-like polyphenol oxidases. Involved in lignin and flavonoids biosynthesis. It has four conserved copper binding domains. Expressed in developing testa, where it colocalizes with the flavonoid end products proanthocyanidins and flavonols. Mutant plants exhibited a delay in developmentally determined browning of the testa, characterized by the pale brown …	0.03147	0.2813	0.4277	0.2251	0.3706	0.2117	0.09766	0.04972	0
AT1G64800	2.37175	0.7424	0.313018	Down		DNA binding / transcription factor;(source:Araport11)	0.03147	2.22	2.076	2.665	2.526	1.709	0.4817	0.6769	0.102
AT5G62310	3.76225	2.27375	0.604359	Down	INCOMPLETE ROOT HAIR ELONGATION (IRE)	Encodes a protein with a serine/threonine kinase domain. There are two other closely related members in Arabidopsis. Knock-out mutation results in incomplete root hair elongation. Expression is found all organs examined but is especially strong in elongating root hairs.	0.03147	3.368	4.444	4.267	2.97	2.846	1.676	2.141	2.432
AT5G62290	46.61	64.285	1.37921	Up		nucleotide-sensitive chloride conductance regulator (ICln) family protein;(source:Araport11)	0.03147	53.23	52.42	36.46	44.33	69.24	60.56	68.42	58.92
AT2G45610	3.712	1.1147	0.300296	Down		alpha/beta-Hydrolases superfamily protein;(source:Araport11)	0.03159	1.922	2.47	8.638	1.818	2.372	0.958	0.6219	0.5069
AT5G49630	24.2875	16.455	0.677509	Down	AMINO ACID PERMEASE 6 (AAP6)	Is a high affinity amino acid transporter capable of transporting aspartate and tryptophan. May be involved in the amino acid uptake from xylem.	0.03161	19.5	26.35	25.79	25.51	16.83	18.22	16.78	13.99
AT2G19500	6.21925	3.5355	0.568477	Down	CYTOKININ OXIDASE 2 (CKX2)	It encodes a protein whose sequence is similar to cytokinin oxidase/dehydrogenase, which catalyzes the degradation of cytokinins.	0.03163	6.41	5.95	8.388	4.129	3.181	3.955	4.244	2.762
AT5G61660	2.3405	1.0338	0.4417	Down		glycine-rich protein;(source:Araport11)	0.03163	3.218	1.993	1.921	2.23	1.384	1.405	0.8011	0.5451
AT1G06640	48.64	31.06	0.638569	Down		encodes a protein whose sequence is similar to a 2-oxoglutarate-dependent dioxygenase The mRNA is cell-to-cell mobile.	0.03163	54.06	50.56	34.13	55.81	37.38	32.54	33.26	21.06
AT4G27970	2.4295	1.18195	0.486499	Down	SLAC1 HOMOLOGUE 2 (SLAH2)	Encodes a protein with ten predicted transmembrane helices. The SLAH2 protein has similarity to the SLAC1 protein involved in ion homeostasis in guard cells. But, it is not expressed in guard cells and cannot complement a slac1-2 mutant suggesting that it performs a different function. SLAH2:GFP localizes to the plasma membrane.	0.03169	1.731	2.862	2.811	2.314	1.692	0.9824	1.285	0.7684
AT1G59640	17.41	10.323	0.592935	Down	BIG PETAL P (BPEP)	A basic helix-loop-helix encoding gene (BIGPETAL, BPE) involved in the control of petal size. BPE is expressed via two mRNAs derived from an alternative splicing event. The BPEub (AT1G59640.1)transcript is expressed ubiquitously, whereas the BPEp (AT1G59640.2) transcript is preferentially expressed in petals. Plants that lack the petal-expressed variant BPEp have larger petals as a result of incr…	0.03169	16.13	21.2	16.76	15.55	14.07	12.72	8.159	6.343
AT4G38760	11.5525	17.145	1.48409	Up		nucleoporin (DUF3414);(source:Araport11)	0.03169	12.28	12.83	10.5	10.6	14.44	13.55	15.29	25.3
AT3G17970	18.415	25.7775	1.39981	Up	TRANSLOCON AT THE OUTER MEMBRANE OF CHLOROPLASTS 64-III (TOC64-III)	Integral chloroplast outer membrane protein. Belongs to one of the 36 carboxylate clamp (CC)-tetratricopeptide repeat (TPR) proteins (Prasad 2010, Pubmed ID: 20856808) with potential to interact with Hsp90/Hsp70 as co-chaperones.	0.03176	18.7	18.32	20.41	16.23	26.33	24.79	26.53	25.46
AT1G64600	12.9	20.4525	1.58547	Up		copper ion binding / methyltransferase;(source:Araport11)	0.0318	14.68	14.35	8.3	14.27	15.49	17.17	17.67	31.48
AT4G09490	33.7925	20.7075	0.612784	Down		Polynucleotidyl transferase, ribonuclease H-like superfamily protein;(source:Araport11)	0.03181	35.65	26.2	43.51	29.81	20.31	23.67	23.63	15.22
AT4G30500	24.8325	16.4125	0.660928	Down		transmembrane protein (DUF788);(source:Araport11)	0.03183	23.6	27.73	20.83	27.17	17.17	16.9	18.78	12.8
AT3G03800	2.33175	1.095	0.469604	Down	SYNTAXIN OF PLANTS 131 (SYP131)	member of SYP13 Gene Family	0.03183	2.932	2.219	2.752	1.424	1.506	0.8705	0.9455	1.058
AT2G25840	20.09	29.235	1.4552	Up	OVULE ABORTION 4 (OVA4)	Nucleotidylyl transferase superfamily protein;(source:Araport11)	0.03189	23.96	22.01	14.37	20.02	25.25	25.77	27.13	38.79
AT5G35965	0.11946	0.251625	2.10635	Up		transposable_element_gene;(source:Araport11);copia-like retrotransposon family, has a 5.9e-244 P-value blast match to GB:CAA72989 open reading frame 1 (Ty1_Copia-element) (Brassica oleracea);(source:TAIR10)	0.0319	0.09854	0.1449	0.1142	0.1202	0.2231	0.225	0.2128	0.3456
AT5G03545	1.5794	0.602075	0.381205	Down		Expressed in roots in response to phosphate starvation, this response is enhanced by the presence of IAA. Additionally, its expression is responsive to both phosphate (Pi) and phosphite (Phi) in shoots. The mRNA is cell-to-cell mobile.	0.03204	0.7146	1.521	1.519	2.563	0.3423	0.6754	0.4716	0.919
AT3G15680	125.425	168.55	1.34383	Up		Ran BP2/NZF zinc finger-like superfamily protein;(source:Araport11)	0.03204	118.5	137	111.1	135.1	177.9	172.5	156.2	167.6
AT2G21440	11.5583	18.87	1.6326	Up		RNA-binding (RRM/RBD/RNP motifs) family protein;(source:Araport11)	0.03209	12.08	13.05	7.873	13.23	13.93	14.95	15.25	31.35
AT2G38310	90.65	57.7025	0.636542	Down	PYR1-LIKE 4 (PYL4)	Encodes a member of the PYR (pyrabactin resistance )/PYL(PYR1-like)/RCAR (regulatory components of ABA receptor) family proteins with 14 members. PYR/PYL/RCAR family proteins function as abscisic acid sensors. Mediate ABA-dependent regulation of protein phosphatase 2Cs ABI1 and ABI2. The mRNA is cell-to-cell mobile.	0.03209	71.12	77.51	131.3	82.67	61.69	59.81	54.26	55.05
AT4G31780	18.815	26.7425	1.42134	Up	MONOGALACTOSYL DIACYLGLYCEROL SYNTHASE 1 (MGD1)	Encodes an A-type monogalactosyldiacylglycerol (MGDG) synthase. It represents the isoform responsible for the bulk of MGDG synthesis in Arabidopsis.	0.03244	22.63	21.35	17.35	13.93	26.45	25.93	28.99	25.6
AT1G67290	16.9713	4.0691	0.239764	Down	GLYOXAL OXIDASE 1 (GLOX1)	glyoxal oxidase-related protein;(source:Araport11)	0.03247	15.99	10.82	35.81	5.265	9.127	5.604	0.5344	1.011
AT1G58561	1.9095	3.11725	1.6325	Up		transposable_element_gene;(source:Araport11);copia-like retrotransposon family, has a 3.8e-219 P-value blast match to GB:AAA57005 Hopscotch polyprotein (Ty1_Copia-element) (Zea mays);(source:TAIR10)	0.03247	1.869	2.213	2.022	1.534	2.915	2.34	2.656	4.558
AT1G53380	10.7565	15.2275	1.41566	Up		hypothetical protein (DUF641);(source:Araport11)	0.03255	11.9	10.81	7.926	12.39	13	14.67	15.17	18.07
AT5G38450	1.8005	0.985125	0.54714	Down	CYTOCHROME P450, FAMILY 735, SUBFAMILY A, POLYPEPTIDE 1 (CYP735A1)	cytochrome P450, family 735, subfamily A, polypeptide 1;(source:Araport11)	0.03266	1.961	1.905	1.685	1.651	0.8466	0.8699	1.207	1.017
AT3G56690	10.7378	14.755	1.37412	Up	CAM INTERACTING PROTEIN 111 (CIP111)	encodes a protein similar to ATPases and binds to calmodulin in vitro. This is a single-copy gene and is expressed in all tissues examined.	0.03266	11.55	12.61	8.211	10.58	13.88	14.06	15	16.08
AT2G35300	9.0375	4.34675	0.480968	Down	LATE EMBRYOGENESIS ABUNDANT 18 (LEA18)	Encodes LEA4-2/LEA18, a member of the Late Embryogenesis Abundant (LEA) proteins which typically accumulate in response to low water availability conditions imposed during development or by the environment.	0.03269	5.637	6.983	12.51	11.02	5.862	4.062	4.038	3.425
AT3G10525	102.32	58.335	0.570123	Down	LOSS OF GIANT CELLS FROM ORGANS (LGO)	Encodes LGO (loss of giant cells from organs) required for endoreduplication in sepal giant cell formation. Giant cells in both leaves and sepals are absent in lgo mutants. LGO is a member of a plant specific cell cycle inhibitor family SIAMESE and was originally named as SMR1(SIAMESE RELATED 1).	0.03279	91.06	73.13	165.3	79.79	62.55	65.21	64.75	40.83
AT2G38910	0.461875	0.179335	0.388276	Down	CALCIUM-DEPENDENT PROTEIN KINASE 20 (CPK20)	member of Calcium Dependent Protein Kinase	0.03279	0.4572	0.6142	0.5117	0.2644	0.1926	0.07664	0.2048	0.2433
AT3G15900	205.125	144.75	0.705667	Down		homoserine O-acetyltransferase;(source:Araport11)	0.03289	219.8	199	199.1	202.6	143.8	155.8	163.5	115.9
AT5G43460	294.9	200.1	0.678535	Down		HR-like lesion-inducing protein-like protein;(source:Araport11)	0.03289	311.1	265.9	272.3	330.3	201.7	231.4	221.9	145.4
AT5G66540	17.965	27.39	1.52463	Up		U3 small nucleolar ribonucleoprotein;(source:Araport11)	0.03291	17.69	20.35	12.77	21.05	21.37	25.23	22.93	40.03
AT1G75110	4.4535	2.59975	0.583754	Down	REDUCED RESIDUAL ARABINOSE 2 (RRA2)	Encodes an arabinosyltransferase that modifies extensin proteins in root hair cells.	0.03308	4.279	4.691	3.229	5.615	2.854	2.798	2.577	2.17
AT5G41740	0.459075	1.04235	2.27054	Up		Disease resistance protein (TIR-NBS-LRR class) family;(source:Araport11)	0.03311	0.6186	0.5698	0.365	0.2829	0.4256	1.276	0.8378	1.63
AT4G29880	11.9205	3.40213	0.285401	Down	PLANT INTRACELLULAR RAS GROUP-RELATED LRR 7 (PIRL7)	Encodes PIRL7, a member of the Plant Intracellular Ras-group-related LRRs (Leucine rich repeat proteins). PIRLs are a distinct, plant-specific class of intracellular LRRs that likely mediate protein interactions, possibly in the context of signal transduction.	0.03316	14.41	9.47	18.72	5.082	8.001	3.982	0.9602	0.6653
AT3G25690	6.18125	9.4105	1.52243	Up	CHLOROPLAST UNUSUAL POSITIONING 1 (CHUP1)	actin binding protein required for normal chloroplast positioning The mRNA is cell-to-cell mobile.	0.03316	7.598	7.236	5.037	4.854	8.415	7.444	8.473	13.31
AT2G21990	0.696525	0.16175	0.232224	Down		MIZU-KUSSEI-like protein (Protein of unknown function, DUF617);(source:Araport11)	0.03317	1.032	0.3228	1.184	0.2473	0.3783	0.128	0.1407	0
AT5G60790	28.995	39.775	1.37179	Up	ATP-BINDING CASSETTE F1 (ABCF1)	member of GCN subfamily	0.03323	30.38	36.25	22.23	27.12	41.23	36.1	39.92	41.85
AT3G47348	138.072	203.35	1.47278	Up		snoRNA;(source:Araport11)	0.03338	149.6	139.3	98.39	165	188.2	214.6	172.6	238
AT3G55220	1.466	2.37675	1.62125	Up	SPLICEOSOME-ASSOCIATED PROTEIN 130 B (SAP130b)	Encodes a spliceosomal protein that is required for proper reproduction. RNAi lines display low pollen viability,caused by a defect in the transition from microspore to bicellular stage during pollen development.	0.03346	1.462	1.748	1.328	1.326	2.158	1.947	2.057	3.345
AT2G35733	9.05	4.38125	0.484116	Down		hypothetical protein;(source:Araport11)	0.03346	8.55	8.443	10.41	8.797	3.717	4.191	5.921	3.696
AT4G03350	1.00818	0.398675	0.395442	Down	ETERNALLY VEGETATIVE PHASE 1 (EVE1)	EVE1 encodes a a novel ubiquitin family protein involved in the transition from the vegetative to the reproductive phase of growth.	0.03356	0.958	1.602	0.8884	0.5843	0.3004	0.5927	0.388	0.3136
AT5G61680	0.551925	0.103	0.18662	Down		Pectin lyase-like superfamily protein;(source:Araport11)	0.03357	0.541	0.1036	1.427	0.1361	0.1944	0.03287	0.08033	0.1044
AT4G17340	8.45825	4.86775	0.575503	Down	TONOPLAST INTRINSIC PROTEIN 2;2 (TIP2;2)	tonoplast intrinsic protein 2;(source:Araport11)	0.03364	5.84	8.81	9.27	9.913	6.081	4.285	4.388	4.717
AT1G23720	1.28032	0.3103	0.24236	Down	EXTENSIN 15 (EXT15)	Proline-rich extensin-like family protein;(source:Araport11)	0.03364	0.5967	0.4572	3.491	0.5764	0.734	0.1276	0.2445	0.1351
AT1G71880	107.02	60.055	0.561157	Down	SUCROSE-PROTON SYMPORTER 1 (SUC1)	Sucrose transporter gene induced in response to nematodes; member of Sucrose-proton symporter family. The mRNA is cell-to-cell mobile.	0.0337	70.68	131	110.5	115.9	99.5	44.85	53.93	41.94
AT2G46650	17.6675	26.75	1.51408	Up	CYTOCHROME B5 ISOFORM C (CB5-C)	member of Cytochromes b5 The mRNA is cell-to-cell mobile.	0.0337	19.41	16.61	15.53	19.12	32.92	31.3	24.9	17.88
AT2G21480	2.98575	1.13973	0.381722	Down	BUDDHAS PAPER SEAL 2 (BUPS2)	BUSP2 plays a smaller role than BUSP1 in pollen tube growth. bups1/2 double mutants have reduced feritlity due to premature rupture of pollen tubes before they reach the ovule but single busp2 mutants are fertile. BUSP2 interacts with RALF4/19 peptide ligands and ANX1/2 receptors. BUPS/ANX signaling may regulate and promote pollen tube growth.	0.0337	2.938	2.508	5.481	1.016	2.043	0.9854	0.5825	0.948
AT5G57340	0.45615	0.896375	1.96509	Up		ras guanine nucleotide exchange factor Q-like protein;(source:Araport11)	0.03375	0.5365	0.5261	0.3442	0.4178	0.8123	1.025	0.9104	0.8378
AT3G33181	1.17718	2.2595	1.91943	Up		transposable_element_gene;(source:Araport11);gypsy-like retrotransposon family (Athila), has a 4.3e-216 P-value blast match to GB:CAA57397 Athila ORF 1 (Arabidopsis thaliana);(source:TAIR10)	0.03383	0.8384	1.3	0.9983	1.572	1.922	1.454	1.78	3.882
AT1G52980	19.485	28.865	1.4814	Up	NUCLEAR/NUCLEOLAR GTPASE 2 (AtNug2)	Encodes a GTPase that belongs to the subfamily of YlqF/YawG GTPases. Functions in Pre-60S ribosomal subunit maturation. The mRNA is cell-to-cell mobile.	0.03384	20.49	20.69	20.52	16.24	24.46	24.85	26.02	40.13
AT3G22850	22.355	15.435	0.69045	Down		aluminum induced protein with YGL and LRDR motifs;(source:Araport11)	0.03384	20.94	24.11	20.06	24.31	17.1	14.97	15.79	13.88
AT4G01190	1.13735	0.481525	0.423375	Down	PHOSPHATIDYLINOSITOL PHOSPHATE KINASE 10 (PIPK10)	Type I phosphatidylinositol-4-phosphate 5-kinase, subfamily A. Preferentially phosphorylates PtdIns4P. Expressed in flowers and inflorescence stems.	0.03386	0.8551	1.645	0.6343	1.415	0.4751	0.6928	0.4063	0.3519
AT5G51030	9.15775	4.98375	0.544211	Down		NAD(P)-binding Rossmann-fold superfamily protein;(source:Araport11)	0.03386	6.748	12.01	6.263	11.61	6.493	3.437	3.943	6.062
AT1G71680	54.1075	22.8003	0.421388	Down		Transmembrane amino acid transporter family protein;(source:Araport11)	0.03386	28.7	56.1	68.13	63.5	48.99	13.52	19.36	9.331
AT1G55265	37.6425	21.275	0.565186	Down		DUF538 family protein, putative (Protein of unknown function, DUF538);(source:Araport11)	0.03394	28.19	27.41	62.18	32.79	24.72	22.59	20.84	16.95
AT4G31230	1.44508	0.42755	0.295867	Down		kinase with adenine nucleotide alpha hydrolases-like domain-containing protein;(source:Araport11)	0.03394	2.139	1.541	1.735	0.3653	0.915	0.4751	0.1908	0.1293
AT1G07050	3.156	5.40425	1.71237	Up	FITNESS (FITNESS)	FITNESS encodes a protein with a single CCT domain and belongs to the CCT motif family genes (CMF). FITNESS acts upstream JUB1 thereby controlling H2O2 levels. FITNESS has a role in cellular redox homeostasis controlling H2O2 levels, due to changes in enzymes, metabolites and transcripts related to ROS detoxification.	0.03398	3.627	3.596	2.457	2.944	5.046	4.75	5.091	6.73
AT1G64360	4.7535	1.5378	0.323509	Down	ENESCENCE-ASSOCIATED AND QQS-RELATED (SAQR)	SAQR is a clade specific protein present in single copy in Arabidopsis.It's expression is increased during light induced oxidative stress ,drought stress and also during senescence. Promoter contains two AGL15 binding sites.	0.03408	2.401	3.787	8.634	4.192	3.38	1.012	1.255	0.5042
AT2G18230	365.025	249.2	0.682693	Down	PYROPHOSPHORYLASE 2 (PPa2)	Encodes a protein that might have inorganic pyrophosphatase activity.	0.0341	331	341.2	415.4	372.5	242.9	292.1	260.1	201.7
AT5G38383	0.03164	0.0893725	2.82467	Up		transposable_element_gene;(source:Araport11);gypsy-like retrotransposon family (Athila), has a 4.9e-185 P-value blast match to GB:CAA57397 Athila ORF 1 (Arabidopsis thaliana);(source:TAIR10)	0.0341	0.0216	0.02759	0.04114	0.03623	0.05987	0.06001	0.06301	0.1746
AT3G12510	34.93	22.0825	0.632193	Down		MADS-box family protein;(source:Araport11)	0.0341	29.58	29.31	29.92	50.91	24.32	24.73	19.88	19.4
AT3G19410	0.203332	0.0321925	0.158324	Down		F-box and associated interaction domains-containing protein;(source:Araport11)	0.03421	0.3203	0.06293	0.2855	0.1446	0.0531	0.02994	0.04573	0
AT1G27330	204.275	135.95	0.665524	Down		Ribosome associated membrane protein RAMP4;(source:Araport11)	0.03424	179.7	190.7	204.2	242.5	131.1	178	132.9	101.8
AT5G12220	4.20125	6.8895	1.63987	Up		las1-like family protein;(source:Araport11)	0.03426	4.603	5.658	2.579	3.965	5.24	5.863	6.773	9.682
AT5G46050	1.58213	0.72445	0.457897	Down	NRT1/ PTR FAMILY 5.2 (NPF5.2)	Encodes a di- and tri-peptide transporter involved in responses to wounding, virulent bacterial pathogens, and high NaCl concentrations. The protein is predicted to have 12 transmembrane helicies.	0.03428	1.775	1.762	1.841	0.9505	0.9109	1.033	0.5703	0.3836
AT4G32940	38.01	26.0625	0.685675	Down	GAMMA VACUOLAR PROCESSING ENZYME (GAMMA-VPE)	Encodes a vacuolar processing enzyme belonging to a novel group of cysteine proteinases that is expressed in vegetative organs and is upregulated in association with various types of cell death and under stressed conditions. They are essential in processing seed storage proteins and for mediating the susceptible response of toxin-induced cell death.	0.03428	33.16	34.1	44.19	40.59	27.25	27.25	27.44	22.31
AT1G75300	4.13175	1.58848	0.384456	Down		encodes a protein whose sequence is similar to an isoflavone reductase	0.03428	4.066	4.142	5.498	2.821	3.2	1.618	1.069	0.4669
AT3G07620	8.7	4.518	0.51931	Down		glycosyltransferase;(source:Araport11)	0.03443	5.195	9.697	11.67	8.238	6.636	3.924	4.794	2.718
ATMG00160	8.744	15.4475	1.76664	Up	CYTOCHROME OXIDASE 2 (COX2)	cytochrome c oxidase subunit 2	0.03443	7.188	10.78	8.557	8.451	13.98	11.3	10.77	25.74
AT1G49270	0.756718	0.13472	0.178032	Down	PROLINE-RICH EXTENSIN-LIKE RECEPTOR KINASE 7 (PERK7)	Encodes a member of the proline-rich extensin-like receptor kinase (PERK) family. This family consists of 15 predicted receptor kinases (PMID: 15653807).	0.03443	1.051	0.4698	1.462	0.04407	0.321	0.1597	0.02439	0.03379
AT5G25320	7.01525	3.509	0.500196	Down		ACT-like superfamily protein;(source:Araport11)	0.03443	3.955	8.868	8.112	7.126	5.829	2.727	3.114	2.366
AT5G47000	38.18	13.1832	0.345292	Down		Peroxidase superfamily protein;(source:Araport11)	0.03443	39.32	33.43	61.36	18.61	30.68	12.45	6.131	3.472
AT5G05450	11.0105	15.675	1.42364	Up	RNA HELICASE 18 (RH18)	P-loop containing nucleoside triphosphate hydrolases superfamily protein;(source:Araport11)	0.03452	12.35	12.09	10.29	9.312	14.65	13.03	15.35	19.67
AT1G04600	2.47375	1.5435	0.623951	Down	MYOSIN XI A (XIA)	member of Myosin-like proteins	0.03454	2.432	3.052	2.191	2.22	1.795	1.105	1.531	1.743
AT1G22760	159.375	101.172	0.634808	Down	POLY(A) BINDING PROTEIN 3 (PAB3)	Putative poly(A) binding protein May there fore function in posttranscriptional regulation, including mRNA turnover and translational initiation. Expression detected only in floral organs.	0.03459	126.6	188.1	165.8	157	134.2	71.57	107.9	91.02
AT4G31700	500.05	716.1	1.43206	Up	RIBOSOMAL PROTEIN S6 (RPS6)	Encodes a putative ribosomal protein S6 (rps6a). RPS6A and RPS6B are fully redundant and essential during gametogenesis.	0.03465	554.3	529.8	359.7	556.4	579.5	721.3	671.5	892.1
AT1G62390	16.765	24.2975	1.4493	Up	PHOX2 (Phox2)	Encodes one of the 36 carboxylate clamp (CC)-tetratricopeptide repeat (TPR) proteins (Prasad 2010, Pubmed ID: 20856808) with potential to interact with Hsp90/Hsp70 as co-chaperones.	0.03466	18.51	18.31	11.76	18.48	20.01	22.03	22.4	32.75
AT5G26730	210.5	148.925	0.707482	Down		Fasciclin-like arabinogalactan family protein;(source:Araport11)	0.03466	222.8	213.8	204.5	200.9	134.8	173.2	164.2	123.5
AT1G52000	6.84325	12.3148	1.79955	Up		Mannose-binding lectin superfamily protein;(source:Araport11)	0.03478	9.803	8.134	3.779	5.657	9.84	8.334	9.695	21.39
AT4G19520	0.156825	0.4021	2.564	Up		disease resistance protein (TIR-NBS-LRR class) family;(source:Araport11)	0.03478	0.1743	0.1743	0.1728	0.1059	0.167	0.3869	0.2551	0.7994
AT5G66020	5.944	3.481	0.585633	Down	SUPPRESSOR OF ACTIN 1B (ATSAC1B)	Mutants in this gene are unable to express female sterility in response to beta-aminobutyric acid, as wild type plants do. non-consensus AT donor splice site at exon 7, TA donor splice site at exon 10, AT acceptor splice at exon 13.	0.03488	4.642	7.335	5.04	6.759	4.678	2.562	3.435	3.249
AT3G42880	1.89353	0.7205	0.380507	Down	POLLEN RECEPTOR LIKE KINASE 3 (PRK3)	Leucine-rich repeat protein kinase family protein;(source:Araport11)	0.03488	2.418	1.66	2.668	0.8281	1.325	0.6176	0.2857	0.6537
AT1G04920	2.73	1.47725	0.541117	Down	SUCROSE PHOSPHATE SYNTHASE 3F (SPS3F)	Encodes a protein with putative sucrose-phosphate synthase activity.	0.03488	2.171	3.336	1.539	3.874	1.428	1.14	1.408	1.933
AT5G41190	28.34	38.0275	1.34183	Up	(NOB1)	Encodes a cytoplasmic protein with RNA endonuclease activity. Mutants display aberrant RNA processing and male and female gametophyte development.	0.03488	28.84	29.93	24.18	30.41	35.79	35.59	38.15	42.58
AT1G18485	1.04195	1.879	1.80335	Up		Pentatricopeptide repeat (PPR) superfamily protein;(source:Araport11)	0.03495	1.267	1.186	0.8831	0.8317	1.386	1.556	1.687	2.887
AT3G04340	10.1728	16.6675	1.63845	Up	EMBRYO DEFECTIVE 2458 (emb2458)	Functions in maintaining the cellular redox balance and regulates photorespiratory metabolism.Strong interaction with TIC inner envelope protein translocon which consists of Tic20/Tic56/Tic100/Tic214(Ycf1)(DOI:10.1105/tpc.18.00357).	0.03507	12.32	11.66	7.085	9.626	11.9	13.19	13.46	28.12
AT2G42440	0.35	0.082045	0.234414	Down	ASYMMETRIC LEAVES 2-LIKE 15 (ASL15)	Lateral organ boundaries (LOB) domain family protein;(source:Araport11)	0.03508	0.4743	0.196	0.5659	0.1638	0.1002	0.0678	0.1243	0.03588
AT5G20430	7.2175	3.27225	0.453377	Down		Mob1/phocein family protein;(source:Araport11)	0.03518	8.524	7.64	7.627	5.079	3.009	4.543	4.191	1.346
AT3G07310	8.69175	13.505	1.55377	Up		phosphoserine aminotransferase, putative (DUF760);(source:Araport11)	0.0352	11.52	9.361	7.071	6.815	10.32	12.16	12.74	18.8
AT4G25960	16.1525	22.59	1.39855	Up	ATP-BINDING CASSETTE B2 (ABCB2)	P-glycoprotein 2;(source:Araport11)	0.03522	15.12	19.22	15.67	14.6	23.81	18.12	22.26	26.17
AT5G58410	10.2338	14.2825	1.39563	Up		HEAT/U-box domain-containing protein;(source:Araport11)	0.03524	11.35	11.46	8.105	10.02	12.99	12.52	13.08	18.54
AT1G27770	4.5545	8.16375	1.79246	Up	AUTOINHIBITED CA2+-ATPASE 1 (ACA1)	Encodes a chloroplast envelope Ca2+-ATPase with an N-terminal autoinhibitor.	0.03526	4.818	5.328	2.799	5.273	4.753	6.935	6.197	14.77
AT1G53430	6.58925	9.22275	1.39967	Up	NEMATODE-INDUCED LRR-RLK 2 (NILR2)	Probable LRR receptor-like ser/thr-protein kinase; Commonly-enriched candidate LPS-interacting PM-associated proteins for both LPS chemotypes subsequent to the polymyxin B affinity chromatography strategy.	0.03542	6.779	7.16	6.107	6.311	8.183	8.215	8.723	11.77
AT1G23620	13.2737	8.3445	0.628647	Down		pseudogene of OBP32pep protein;(source:Araport11)	0.03547	10.97	17.49	8.495	16.14	9.414	7.493	7.828	8.643
AT2G33800	183.975	251.75	1.36839	Up	SCABRA 1 (SCA1)	Encodes SCABRA1 (SCA1), a nuclear gene encoding a plastid-type ribosomal protein that functions as a structural component of the 70S plastid ribosome. The sca1-rps5 allele exhibits defects in plastid 16SrRNA processing and a resulting decrease in accumulation of photosynthetic proteins. Loss-of-function mutations enhance the polarity defects of the as2 mutants.	0.03547	187	181.1	186.2	181.6	251.2	226.9	239.3	289.6
AT1G23070	1.1029	0.5244	0.475474	Down		organic solute transporter ostalpha protein (DUF300);(source:Araport11)	0.03548	0.9166	1.545	0.92	1.03	0.611	0.5282	0.3508	0.6076
AT1G13070	0.15784	0.0269975	0.171043	Down	CYTOCHROME P450, FAMILY 71, SUBFAMILY B, POLYPEPTIDE 27 (CYP71B27)	putative cytochrome P450	0.03552	0.1363	0.1305	0.07896	0.2856	0.03671	0.0207	0.05058	0
AT1G06830	4.997	2.28925	0.458125	Down	CEP DOWNSTREAM 1 (CEPD1)	Encodes a member of the CC-type glutaredoxin (ROXY) family that has been shown to interact with the transcription factor TGA2. CEPD1 is a non secreted polypeptide that is highly similar to CEPD2 which is another member of a novel family related to glutaredoxins. It is induced by nitrogen starvation. It acts downstream of the CEP1 peptide in systemic N-demand signalling .The RNA is expressed in th…	0.03554	2.65	4.85	5.478	7.01	2.395	2.722	1.44	2.6
AT5G13270	1.56288	2.84725	1.8218	Up	REQUIRED FOR ACCD RNA EDITING 1 (RARE1)	Encodes RARE1 (Required for accD RNA Editing 1), a trans-factor essential for C-to-U editing of the chloroplast accD transcript. RARE1 carries 15 PPR (pentatricopeptide repeat) motifs, an E/E+ and a DYW domain (C-terminal tripeptide).	0.03554	2.204	1.559	0.8915	1.597	1.956	2.448	2.887	4.098
AT2G46280	185.15	251.225	1.35687	Up	TGF-BETA RECEPTOR INTERACTING PROTEIN 1 (TRIP-1)	Encodes a homolog of mammalian TGF-beta receptor interacting protein. Co-immunoprecipitates with BRI1 and can be phosphorylated in vitro by BRI1 at specific sites (Thr-14, Thr-89, and either Thr-197 or Ser-198). May therefore be a cytoplasmic BRI1 substrate and involved in brassinosteroid regulated plant growth and development.The encoded protein has two DWD motifs. It can bind to DDB1a in Y2H as…	0.03554	192.9	184	176.8	186.9	233.9	242.9	236.8	291.3
AT3G07350	1.23725	2.3615	1.90867	Up		sulfate/thiosulfate import ATP-binding protein, putative (DUF506);(source:Araport11)	0.03554	1.526	1.001	1.248	1.174	1.547	2.083	2.778	3.038
AT2G46830	5.9095	3.756	0.635587	Down	CIRCADIAN CLOCK ASSOCIATED 1 (CCA1)	Encodes a transcriptional repressor that performs overlapping functions with LHY in a regulatory feedback loop that is closely associated with the circadian oscillator of Arabidopsis. Binds to the evening element in the promoter of TOC1 and represses TOC1 transcription. CCA1 and LHY colocalize in the nucleus and form heterodimers in vivo. CCA1 and LHY function synergistically in regulating circad…	0.03564	4.842	6.336	5.074	7.386	3.603	3.724	4.166	3.531
AT5G17590	9.63575	5.094	0.528656	Down		Putative membrane lipoprotein;(source:Araport11)	0.0357	9.34	10.59	11.3	7.313	7.533	3.88	4.918	4.045
AT1G48745	1.23125	0.5517	0.448081	Down		hypothetical protein;(source:Araport11)	0.0357	1.312	1.197	1.347	1.069	0.4849	0.5922	0.6958	0.4339
AT3G52620	2.667	1.19375	0.4476	Down		transmembrane protein;(source:Araport11)	0.03579	2.178	3.199	3.282	2.009	1.409	1.059	1.186	1.121
AT3G06880	4.89625	6.849	1.39883	Up		Transducin/WD40 repeat-like superfamily protein;(source:Araport11)	0.0358	5.319	5.46	4.249	4.557	6.139	5.914	7.003	8.34
AT3G54350	19.0575	27.7325	1.4552	Up	EMBRYO DEFECTIVE 1967 (emb1967)	Forkhead-associated (FHA) domain-containing protein;(source:Araport11)	0.03589	19.82	19.97	16.32	20.12	23.8	23.11	23.68	40.34
AT1G79915	8.4355	3.98825	0.472794	Down		Putative methyltransferase family protein;(source:Araport11)	0.03593	4.261	6.511	9.57	13.4	5.827	4.178	3.076	2.872
AT3G53560	20.9	30.1475	1.44246	Up		Tetratricopeptide repeat (TPR)-like superfamily protein;(source:Araport11)	0.03601	20.37	23.36	22.27	17.6	25.66	27.69	29.22	38.02
AT5G47640	12.5288	18.37	1.46623	Up	NUCLEAR FACTOR Y, SUBUNIT B2 (NF-YB2)	Involved in the regulation of response to nutrient levels.	0.03602	12.8	13.54	8.635	15.14	15.84	16.19	19.45	22
[truncated: 1,335 more rows]
